# Supplementary material
Source: Preprints.org preprint supplement (doi:10.20944/preprints202005.0027.v1)
Supplement: Supplementary file 2 [file supplementary]

## Sheet: US-likely
2020-05-01	2020-05-01	2022-10-01	2020-06-01	2020-07-15	2020-09-01	2021-01-01	scale all unlocks by	0-main region, 1-subregion, 2-without sub	Use Daily Partial Unlock->1	UNLOCK ALL->1	Initial & Unlocked R0	Total / Known case ratio	Mortality as % of vent cases enter at right	FINAL CASES	Econ Cost % 18-month lock down	Total Est. Deaths	Use proportional vent. alloc.	Initial Known Cases on Vent.	Spreading Window (Days)	Case Duration	Vents per capita	Vents avail for current region	Vents main region	Vents subregion (if not auto alloc)	Pre-Peak Vent. Util. Target	MWFSa or late Vent. Util. Target	TTSu Vent. Util. Target	Population	Population main region	Population subregion (e.g. NY St.)	Name of main region	Name of sub-region	Ventil mfg rate/day	Change per day in crit cases on vent (.01%=half in 1 yr.)	region mortality % of vent cases	sub-region mortality % of vent cases	region w/o sub-region mortality % vent cases
0	0.08	RE- LOCK	0.2	0.35	0.65	1	1	0	0	0	2.5	15	1.05	0.64152	0.330018	762334	0	0.05	6	14	0.000316176	100000	100000	7500	0.4	0.4	0.4	340000000	340000000	20000000	US	NY	300	0.0001	1.05	1.5	0.88
Date	Predicted Known cases	US known cases	US known cases	NY known cases	Target Vent. Util.	Known Spreading Cases	Known Active Cases	Total Cum. Cases	US Known New Cases	US COVID-19 Replication Rate (R0)	Unlock this day of the week on:	Lock-down ON/OFF	5.5	US cases - ending 11/10/22	historical known cases	UNLOCK %: R0=2.5, Deaths=0.76M, Cost=33%	ventilator utilization, 100000+300/day, Case Ratio=15	predicted active cases, fixed unlock, case ratio=15	predicted active cases as of 3/21	predicted active cases as of 3/21	herd immunity ihreshold 60%	potential unlock effectiveness	suscepti-bility	last actual R0	current # ventils	current % known cases on vent	last 2-day avg R0	last locked R0	susceptibility change rate	Rt	US pred	NY pred	US excl NY pred	predicted from date	Est. Deaths	cases end date	date
2020-03-21	24000	24000	24000	10356	0	24000	24000	360000	3528.4	2.5	2021-01-01	0	2020-03-21	0.00105882	0.00105882	0.08	0.012	0.00105882	0.00423529	0.00423529	0.6	0.08	0.998941	2.5	100000	0.05	2.5	2.5	1	2.49735	0.00423529	0.0062136	0.00426375	2020-05-01	185.241	2022-11-10		delta-cases
2020-03-22	32821	32821	32821	15168	0	32821	32821	492315	8821	2.35262	2021-01-01	1	2020-03-22	0.00144799	0.00144799	0	0.0163777	0.00144799	0.00599253	0.00599253	0.574943	0	0.998552	2.35262	100000	0.0499	2.42631	2.35262	0.99961	2.34922	0.00599253	0.00878651	0.00603274	2020-05-01	648.344	2022-11-10	2020-03-22	8821
2020-03-23	43600	43600	43600	20875	0	43600	43600	654000	10779	2.16157	2021-01-01	1	2020-03-23	0.00192353	0.00192353	0	0.0217129	0.00192353	0.00847445	0.00847445	0.537372	0	0.998076	2.16157	100000	0.0498002	2.2571	2.16157	0.999524	2.15741	0.00847445	0.0124154	0.00853121	2020-05-01	1214.24	2022-11-10	2020-03-23	10779
2020-03-24	53870	53870	53870	25665	0	53870	53870	808050	10270	2.10687	2021-01-01	1	2020-03-24	0.00237662	0.00237662	0	0.0267737	0.00237662	0.0119755	0.0119755	0.525363	0	0.997623	2.10687	100000	0.0497006	2.13422	2.10687	0.999546	2.10187	0.0119755	0.0175242	0.0120556	2020-05-01	1753.42	2022-11-10	2020-03-24	10270
2020-03-25	67857	67857	67857	30811	0	67857	67857	1017855	13987	2.04473	2021-01-01	1	2020-03-25	0.00299369	0.00299369	0	0.0336579	0.00299369	0.0169056	0.0169056	0.510938	0	0.997006	2.04473	100000	0.0496012	2.0758	2.04473	0.999381	2.03861	0.0169056	0.0246981	0.0170182	2020-05-01	2487.73	2022-11-10	2020-03-25	13987
2020-03-26	84773	84773	84773	37258	0	84773	84773	1271595	16916	1.95223	2021-01-01	1	2020-03-26	0.00373999	0.00373999	0	0.0419643	0.00373999	0.0238305	0.0238305	0.487764	0	0.99626	1.95223	100000	0.049502	1.99848	1.95223	0.999251	1.94492	0.0238305	0.0347348	0.0239884	2020-05-01	3375.82	2022-11-10	2020-03-26	16916
2020-03-27	102738	102738	102738	44635	0	78738	102738	1541070	17965	1.84384	2021-01-01	1	2020-03-27	0.00453256	0.00453256	0	0.0388989	0.00453256	0.0335233	0.0335233	0.457652	0	0.995467	1.84384	100000	0.049403	1.89803	1.84384	0.999204	1.83548	0.0335233	0.0487049	0.0337438	2020-05-01	4318.99	2022-11-10	2020-03-27	17965
2020-03-28	122070	122070	122070	52318	0	89249	122070	1831050	19332	1.82848		1	2020-03-28	0.00538544	0.00538544	0	0.0440035	0.00538544	0.04674	0.04674	0.453099	0	0.994615	1.82848	100000	0.0493042	1.83616	1.82848	0.999143	1.81864	0.04674	0.0676022	0.0470444	2020-05-01	5333.92	2022-11-10	2020-03-28	19332
2020-03-29	140321	140321	140321	59513	0	96721	140321	2104815	18251	1.71288		1	2020-03-29	0.00619063	0.00619063	0	0.0475921	0.00619063	0.0643276	0.0643276	0.416188	0	0.993809	1.71288	100000	0.0492056	1.77068	1.71288	0.99919	1.70228	0.0643276	0.0924662	0.0647407	2020-05-01	6292.09	2022-11-10	2020-03-29	18251
2020-03-30	162417	162417	162417	66497	0	108547	162417	2436255	22096	1.68898		1	2020-03-30	0.00716546	0.00716546	0	0.0533044	0.00716546	0.0874799	0.0874799	0.407925	0	0.992835	1.68898	100000	0.0491072	1.70093	1.68898	0.999019	1.67687	0.0874799	0.124697	0.0880308	2020-05-01	7452.13	2022-11-10	2020-03-30	22096
2020-03-31	187500	187500	187500	75795	0	119643	187500	2812500	25083	1.6542		1	2020-03-31	0.00827206	0.00827206	0	0.0586358	0.00827206	0.117531	0.117531	0.39548	0	0.991728	1.6542	100000	0.049009	1.67159	1.6542	0.998885	1.64052	0.117531	0.165675	0.118252	2020-05-01	8768.99	2022-11-10	2020-03-31	25083
2020-04-01	214465	214465	214465	83712	0	129692	214465	3216975	26965	1.60208		1	2020-04-01	0.00946169	0.00946169	0	0.0634336	0.00946169	0.155829	0.155829	0.375813	0	0.990538	1.60208	100000	0.0489109	1.62814	1.60208	0.9988	1.58692	0.155829	0.216486	0.156751	2020-05-01	10184.7	2022-11-10	2020-04-01	26965
2020-04-02	244000	244000	244000	92381	0	141262	244000	3660000	29535	1.57791		1	2020-04-02	0.0107647	0.0107647	0	0.0689544	0.0107647	0.203501	0.203501	0.366252	0	0.989235	1.57791	100000	0.0488131	1.59	1.57791	0.998685	1.56093	0.203501	0.277513	0.204647	2020-05-01	11735.2	2022-11-10	2020-04-02	29535
2020-04-03	276000	276000	276000	102863	0	153930	276000	4140000	32000	1.54834		1	2020-04-03	0.0121765	0.0121765	0	0.0749877	0.0121765	0.261084	0.261084	0.354149	0	0.987824	1.54834	100000	0.0487155	1.56313	1.54834	0.998573	1.52949	0.261084	0.347953	0.262462	2020-05-01	13415.2	2022-11-10	2020-04-03	32000
2020-04-04	310500	310500	310500	113704	0	170179	286500	4657500	34500	1.51828		1	2020-04-04	0.0136985	0.0136985	0	0.0827377	0.0126397	0.311259	0.311259	0.341359	0	0.986301	1.51828	100000	0.0486181	1.53331	1.51828	0.998459	1.49748	0.311259	0.400831	0.312737	2020-05-01	15226.5	2022-11-10	2020-04-04	34500
2020-04-05	336327	336327	336327	123018	0	173910	303506	5044905	25827	1.38878		1	2020-04-05	0.014838	0.014838	0	0.0843826	0.01339	0.379179	0.379179	0.279943	0	0.985162	1.38878	100000	0.0485208	1.45353	1.38878	0.998845	1.36817	0.379179	0.471759	0.38077	2020-05-01	16582.4	2022-11-10	2020-04-05	25827
2020-04-06	364028	364028	364028	130689	0	176528	320428	5460420	27701	1.35278		1	2020-04-06	0.0160601	0.0160601	0	0.0854815	0.0141365	0.448852	0.448852	0.260779	0	0.98394	1.35278	100000	0.0484238	1.37078	1.35278	0.998759	1.33105	0.448852	0.537363	0.45045	2020-05-01	18036.7	2022-11-10	2020-04-06	27701
2020-04-07	395000	395000	395000	139000	0	180535	341130	5925000	30972	1.32813		1	2020-04-07	0.0174265	0.0174265	0	0.087247	0.0150499	0.515085	0.515085	0.247064	0	0.982574	1.32813	100000	0.0483269	1.34045	1.32813	0.998611	1.30499	0.515085	0.591865	0.516562	2020-05-01	19662.7	2022-11-10	2020-04-07	30972
2020-04-08	426659	426659	426659	149316	0	182659	358802	6399885	31659	1.28047		1	2020-04-08	0.0188232	0.0188232	0	0.0880969	0.0158295	0.572266	0.572266	0.219034	0	0.981177	1.28047	100000	0.0482303	1.3043	1.28047	0.998579	1.25636	0.572266	0.630591	0.573491	2020-05-01	21324.8	2022-11-10	2020-04-08	31659
2020-04-09	466546	466546	466546	161504	0	190546	381773	6998190	39887	1.3179		1	2020-04-09	0.0205829	0.0205829	0	0.0917171	0.0168429	0.615228	0.615228	0.241215	0	0.979417	1.3179	100000	0.0481338	1.29918	1.3179	0.998207	1.29077	0.615228	0.650371	0.616094	2020-05-01	23418.9	2022-11-10	2020-04-09	39887
2020-04-10	502000	502000	502000	173258	0	191500	399262	7530000	35454	1.26072		1	2020-04-10	0.0221471	0.0221471	0	0.0919919	0.0176145	0.640319	0.640319	0.206804	0	0.977853	1.26072	100000	0.0480375	1.28931	1.26072	0.998403	1.2328	0.640319	0.649909	0.64076	2020-05-01	25280.2	2022-11-10	2020-04-10	35454
2020-04-11	531257	531257	531257	180458	0	194930	409187	7968855	29257	1.19394		1	2020-04-11	0.0234378	0.0234378	0	0.0934523	0.0180524	0.64573	0.64573	0.162436	0	0.976562	1.19394	100000	0.0479415	1.22733	1.19394	0.99868	1.16595	0.64573	0.629468	0.645721	2020-05-01	26816.2	2022-11-10	2020-04-11	29257
2020-04-12	560402	560402	560402	189415	0	196374	420081	8406030	29145	1.16741		1	2020-04-12	0.0247236	0.0247236	0	0.0939563	0.018533	0.631305	0.631305	0.143404	0	0.975276	1.16741	100000	0.0478456	1.18068	1.16741	0.998683	1.13855	0.631305	0.590562	0.63085	2020-05-01	28346.3	2022-11-10	2020-04-12	29145
2020-04-13	585290	585290	585290	195031	0	190290	422873	8779350	24888	1.09562		1	2020-04-13	0.0258216	0.0258216	0	0.0905915	0.0186562	0.598222	0.598222	0.0872787	0	0.974178	1.09562	100300	0.0477499	1.13152	1.09562	0.998874	1.06733	0.598222	0.535908	0.597358	2020-05-01	29653	2022-11-10	2020-04-13	24888
2020-04-14	611745	611745	611745	202208	0	185086	424245	9176175	26455	1.07278		1	2020-04-14	0.0269887	0.0269887	0	0.0876756	0.0187167	0.548788	0.548788	0.0678431	0	0.973011	1.07278	100600	0.0476544	1.0842	1.07278	0.998802	1.04383	0.548788	0.469442	0.547575	2020-05-01	31041.9	2022-11-10	2020-04-14	26455
2020-04-15	644025	644025	644025	214642	0	177479	429560	9660375	32280	1.09556		1	2020-04-15	0.0284129	0.0284129	0	0.0836545	0.0189512	0.486447	0.486447	0.0872269	0	0.971587	1.09556	100900	0.0475591	1.08417	1.09556	0.998536	1.06443	0.486447	0.396228	0.484974	2020-05-01	32736.6	2022-11-10	2020-04-15	32280
2020-04-16	676339	676339	676339	226198	0	174339	432339	10145085	32314	1.0891		1	2020-04-16	0.0298385	0.0298385	0	0.081767	0.0190738	0.415846	0.415846	0.081811	0	0.970162	1.0891	101200	0.047464	1.09233	1.0891	0.998533	1.0566	0.415846	0.322038	0.414229	2020-05-01	34433	2022-11-10	2020-04-16	32314
2020-04-17	709201	709201	709201	233951	0	177944	433201	10638015	32862	1.0971		1	2020-04-17	0.0312883	0.0312883	0	0.0830447	0.0191118	0.342499	0.342499	0.0885087	0	0.968712	1.0971	101500	0.047369	1.0931	1.0971	0.998506	1.06278	0.342499	0.252379	0.340868	2020-05-01	36158.3	2022-11-10	2020-04-17	32862
2020-04-18	737023	737023	737023	241041	0	176621	426523	11055345	27822	1.05497		1	2020-04-18	0.0325157	0.0325157	0	0.08202	0.0188172	0.271967	0.271967	0.0521061	0	0.967484	1.05497	101800	0.0472743	1.07604	1.05497	0.998733	1.02067	0.271967	0.1914	0.270444	2020-05-01	37618.9	2022-11-10	2020-04-18	27822
2020-04-19	764265	764265	764265	247215	0	178975	427938	11463975	27242	1.04165		1	2020-04-19	0.0337176	0.0337176	0	0.0827032	0.0188796	0.208799	0.208799	0.0399876	0	0.966282	1.04165	102100	0.0471798	1.04831	1.04165	0.998758	1.00653	0.208799	0.141228	0.207471	2020-05-01	39049.2	2022-11-10	2020-04-19	27242
2020-04-20	792759	792759	792759	252094	0	181014	428731	11891385	28494	1.03724		1	2020-04-20	0.0349747	0.0349747	0	0.0832336	0.0189146	0.155711	0.155711	0.0359044	0	0.965025	1.03724	102400	0.0470854	1.03945	1.03724	0.998699	1.00096	0.155711	0.102024	0.154622	2020-05-01	40545.1	2022-11-10	2020-04-20	28494
2020-04-21	816385	816385	816385	256555	0	172360	421385	12245775	23626	0.979247		1	2020-04-21	0.036017	0.036017	0	0.0788647	0.0185905	0.113447	0.113447	0	0	0.963983	0.979247	102700	0.0469912	1.00824	0.979247	0.99892	0.943977	0.113447	0.0726087	0.112597	2020-05-01	41785.5	2022-11-10	2020-04-21	23626
2020-04-22	848994	848994	848994	262268	0	172655	422335	12734910	32609	1.04832		1	2020-04-22	0.0374556	0.0374556	0	0.0786121	0.0186324	0.0812314	0.0812314	0.0460948	0	0.962544	1.04832	103000	0.0468972	1.01378	1.04832	0.998508	1.00906	0.0812314	0.0512009	0.0805932	2020-05-01	43497.4	2022-11-10	2020-04-22	32609
2020-04-23	879430	879430	879430	268581	0	170229	412884	13191450	30436	1.03063		1	2020-04-23	0.0387984	0.0387984	0	0.0771278	0.0182155	0.0574769	0.0574769	0.0297158	0	0.961202	1.03063	103300	0.0468034	1.03947	1.03063	0.998605	0.990639	0.0574769	0.0359644	0.0570121	2020-05-01	45095.3	2022-11-10	2020-04-23	30436
2020-04-24	925038	925038	925038	277445	0	188015	423038	13875570	45608	1.16643		1	2020-04-24	0.0408105	0.0408105	0	0.0847698	0.0186634	0.0403853	0.0403853	0.142684	0	0.95919	1.16643	103600	0.0467098	1.09853	1.16643	0.997907	1.11883	0.0403853	0.0252946	0.0400546	2020-05-01	47489.7	2022-11-10	2020-04-24	45608
2020-04-25	960525	960525	960525	288313	0	196260	429268	14407875	35487	1.09446		1	2020-04-25	0.0423761	0.0423761	0	0.0880552	0.0189383	0.028305	0.028305	0.08631	0	0.957624	1.09446	103900	0.0466164	1.13045	1.09446	0.998368	1.04808	0.028305	0.0179096	0.0280741	2020-05-01	49352.8	2022-11-10	2020-04-25	35487
2020-04-26	987322	987322	987322	293991	0	194563	426920	14809830	26797	1.02769		1	2020-04-26	0.0435583	0.0435583	0	0.0868684	0.0188347	0.0198761	0.0198761	0.0269414	0	0.956442	1.02769	104200	0.0465232	1.06108	1.02769	0.998765	0.982923	0.0198761	0.0128402	0.0197175	2020-05-01	50759.6	2022-11-10	2020-04-26	26797
2020-04-27	1010356	1010356	1010356	298004	0	193971	425066	15155340	23034	0.999728		1	2020-04-27	0.0445745	0.0445745	0	0.0861828	0.0187529	0.0140488	0.0140488	0	0	0.955425	0.999728	104500	0.0464301	1.01371	0.999728	0.998938	0.955166	0.0140488	0.00937982	0.0139416	2020-05-01	51968.9	2022-11-10	2020-04-27	23034
2020-04-28	1035765	1035765	1035765	303048	0	186771	424020	15536475	25409	0.97696		1	2020-04-28	0.0456955	0.0456955	0	0.0825807	0.0187068	0.0100459	0.0100459	0	0	0.954304	0.97696	104800	0.0463373	0.988344	0.97696	0.998827	0.932318	0.0100459	0.00702672	0.00997476	2020-05-01	53302.9	2022-11-10	2020-04-28	25409
2020-04-29	1064194	1064194	1064194	306158	0	184764	420169	15962910	28429	0.979414		1	2020-04-29	0.0469497	0.0469497	0	0.0812972	0.0185369	0.00730826	0.00730826	0	0	0.95305	0.979414	105100	0.0462446	0.978187	0.979414	0.998686	0.93343	0.00730826	0.0054306	0.00726219	2020-05-01	54795.4	2022-11-10	2020-04-29	28429
2020-04-30	1094464	1094464	1094464	310389	0	169426	418125	16416960	30270	0.984771		1	2020-04-30	0.0482852	0.0482852	0	0.0741876	0.0184467	0.00544148	0.00544148	0	0	0.951715	0.984771	105400	0.0461521	0.982093	0.984771	0.998599	0.937222	0.00544148	0.00434964	0.00541275	2020-05-01	56384.6	2022-11-10	2020-04-30	30270
2020-05-01	1129882	1129882	1129882	314318	0	169357	420681	16948230	35418	1.04886		0	2020-05-01	0.0498477	0.0498477	0.08	0.073799	0.0185595	0.00417115	0.00417115	0.0465811	0.08	0.950152	1.04886	105700	0.0460598	1.01681	0.984771	0.998358	0.996574	0.00417115	0.00361814	0.00415436	2020-05-01	58244	2022-11-10	2020-05-01	35418
2020-05-02	1.15789e+06	0			0	170573	420872	1.73684e+07	28012.5	1.0445		0	2020-05-02	0.0510836		0.08	0.0739701	0.0185679	0.00330788	0.00330788	0.0426019	0.08	0.948916	1.04886	106000	0.0459677	1.04668	0.984771	0.998699	0.991141	0.00330788	0.00312305	0.00329927	00:00:00	59714.7	2022-11-10	2020-05-02	-1129882
2020-05-03	1.18651e+06	0			0	176154	422245	1.77977e+07	28615.8	1.06077		0	2020-05-03	0.052346		0.08	0.0760227	0.0186285	0.00272166	0.00272166	0.0572873	0.08	0.947654	1.04886	106300	0.0458758	1.05263	0.984771	0.99867	1.00524	0.00272166	0.00278757	0.00271865	00:00:00	61217	2022-11-10	2020-05-03	0
2020-05-04	1.21655e+06	0			0.4	180787	423793	1.82483e+07	30041.6	1.07977		0	2020-05-04	0.0536714		0.08	0.0776468	0.0186967	0.00232361	0.00232361	0.073875	0.08	0.946329	1.04886	106600	0.045784	1.07027	0.984771	0.998601	1.02182	0.00232361	0.00255972	0.00232443	00:00:00	62794.2	2022-11-10	2020-05-04	0
2020-05-05	1.24756e+06	0			0	183367	431176	1.87134e+07	31008.8	1.0875		0	2020-05-05	0.0550394		0.08	0.0783767	0.0190225	0.0020532	0.0020532	0.080456	0.08	0.944961	1.04886	106900	0.0456924	1.08363	0.984771	0.998554	1.02764	0.0020532	0.00240436	0.00205661	00:00:00	64422.2	2022-11-10	2020-05-05	0
2020-05-06	1.27928e+06	0			0.4	184813	430283	1.91892e+07	31716.3	1.09825		0	2020-05-06	0.0564387		0.08	0.0786163	0.0189831	0.00186925	0.00186925	0.0894564	0.08	0.943561	1.04886	107200	0.0456011	1.09287	0.984771	0.998519	1.03626	0.00186925	0.00229777	0.00187442	00:00:00	66087.3	2022-11-10	2020-05-06	0
2020-05-07	1.31147e+06	0			0	181586	432038	1.9672e+07	32191.4	1.10761		0	2020-05-07	0.0578589		0.08	0.0768742	0.0190605	0.00174384	0.00174384	0.0971585	0.08	0.942141	1.04886	107500	0.0455099	1.10293	0.984771	0.998495	1.04353	0.00174384	0.00222399	0.0017502	00:00:00	67777.3	2022-11-10	2020-05-07	0
2020-05-08	1.34325e+06	0			0.4	185354	418211	2.01487e+07	31780.3	1.11458		0	2020-05-08	0.059261		0.08	0.0780943	0.0184505	0.00165804	0.00165804	0.102798	0.08	0.940739	1.04886	107800	0.0454188	1.11109	0.984771	0.998512	1.04852	0.00165804	0.00217225	0.0016652	00:00:00	69445.8	2022-11-10	2020-05-08	0
2020-05-09	1.37584e+06	0			0	189327	415312	2.06376e+07	32588.2	1.12135		0	2020-05-09	0.0606987		0.08	0.0793875	0.0183226	0.00159901	0.00159901	0.108214	0.08	0.939301	1.04886	108100	0.045328	1.11796	0.984771	0.998472	1.05328	0.00159901	0.00213531	0.0016067	00:00:00	71156.7	2022-11-10	2020-05-09	0
2020-05-10	1.40924e+06	0			0	192692	421922	2.11387e+07	33406.9	1.12712		0	2020-05-10	0.0621725		0.08	0.0804139	0.0186142	0.00155807	0.00155807	0.112784	0.08	0.937827	1.04886	108400	0.0452373	1.12423	0.984771	0.998431	1.05705	0.00155807	0.00210832	0.00156611	00:00:00	72910.5	2022-11-10	2020-05-10	0
2020-05-11	1.44334e+06	0			0.4	195777	432982	2.16501e+07	34094.2	1.132		0	2020-05-11	0.0636767		0.08	0.081313	0.0191021	0.00152936	0.00152936	0.116606	0.08	0.936323	1.04886	108700	0.0451469	1.12956	0.984771	0.998396	1.05992	0.00152936	0.002088	0.00153762	00:00:00	74700.5	2022-11-10	2020-05-11	0
2020-05-12	1.47806e+06	0			0	198779	442291	2.21708e+07	34717.6	1.13635		0	2020-05-12	0.0652083		0.08	0.0821677	0.0195128	0.0015089	0.0015089	0.119992	0.08	0.934792	1.04886	109000	0.0450566	1.13418	0.984771	0.998364	1.06225	0.0015089	0.00207216	0.0015173	00:00:00	76523.2	2022-11-10	2020-05-12	0
2020-05-13	1.51336e+06	0			0.4	201896	449170	2.27005e+07	35308.4	1.14011		0	2020-05-13	0.0667661		0.08	0.0830606	0.0198163	0.00149401	0.00149401	0.122888	0.08	0.933234	1.04886	109300	0.0449665	1.13823	0.984771	0.998334	1.06398	0.00149401	0.00205932	0.0015025	00:00:00	78376.8	2022-11-10	2020-05-13	0
2020-05-14	1.54927e+06	0			0	206019	454804	2.3239e+07	35904.2	1.14335		0	2020-05-14	0.0683501		0.08	0.0843562	0.0200649	0.00148288	0.00148288	0.125378	0.08	0.93165	1.04886	109600	0.0448765	1.14173	0.984771	0.998303	1.0652	0.00148288	0.00204852	0.00149141	00:00:00	80261.8	2022-11-10	2020-05-14	0
2020-05-15	1.58593e+06	0			0.4	210098	456052	2.3789e+07	36666.2	1.14619		0	2020-05-15	0.0699677		0.08	0.0856196	0.02012	0.00147429	0.00147429	0.127544	0.08	0.930032	1.04886	109900	0.0447868	1.14477	0.984771	0.998264	1.06599	0.00147429	0.00203907	0.00148284	00:00:00	82186.8	2022-11-10	2020-05-15	0
2020-05-16	1.62334e+06	0			0	214098	465447	2.43501e+07	37407.2	1.14865		0	2020-05-16	0.071618		0.08	0.0868382	0.0205344	0.00146742	0.00146742	0.129412	0.08	0.928382	1.04886	110200	0.0446972	1.14742	0.984771	0.998226	1.06638	0.00146742	0.00203055	0.00147596	00:00:00	84150.7	2022-11-10	2020-05-16	0
2020-05-17	1.66146e+06	0			0	218126	474954	2.4922e+07	38122.5	1.15078		0	2020-05-17	0.0732999		0.08	0.0880555	0.0209538	0.0014617	0.0014617	0.131027	0.08	0.9267	1.04886	110500	0.0446078	1.14972	0.984771	0.998188	1.06643	0.0014617	0.00202266	0.00147023	00:00:00	86152.1	2022-11-10	2020-05-17	0
2020-05-18	1.7003e+06	0			0.4	222241	483744	2.55044e+07	38832.1	1.15264		0	2020-05-18	0.0750131		0.08	0.0892946	0.0213417	0.00145677	0.00145677	0.132428	0.08	0.924987	1.04886	110800	0.0445186	1.15171	0.984771	0.998151	1.06618	0.00145677	0.00201519	0.00146527	00:00:00	88190.8	2022-11-10	2020-05-18	0
2020-05-19	1.73984e+06	0			0	226479	492282	2.60976e+07	39546.7	1.15426		0	2020-05-19	0.0767578		0.08	0.0905702	0.0217183	0.00145236	0.00145236	0.133641	0.08	0.923242	1.04886	111100	0.0444296	1.15345	0.984771	0.998114	1.06566	0.00145236	0.00200801	0.00146084	00:00:00	90267	2022-11-10	2020-05-19	0
2020-05-20	1.78012e+06	0			0.4	230848	500839	2.67017e+07	40273.7	1.15566		0	2020-05-20	0.0785346		0.08	0.0918849	0.0220959	0.00144832	0.00144832	0.134692	0.08	0.921465	1.04886	111400	0.0443407	1.15496	0.984771	0.998075	1.0649	0.00144832	0.00200105	0.00145676	00:00:00	92381.4	2022-11-10	2020-05-20	0
2020-05-21	1.82113e+06	0			0	235197	509663	2.7317e+07	41014.9	1.15688		0	2020-05-21	0.080344		0.08	0.0931776	0.0224851	0.00144452	0.00144452	0.135603	0.08	0.919656	1.04886	111700	0.044252	1.15627	0.984771	0.998036	1.06393	0.00144452	0.00199423	0.00145293	00:00:00	94534.6	2022-11-10	2020-05-21	0
2020-05-22	1.86287e+06	0			0.4	239533	519626	2.79431e+07	41743.6	1.15793		0	2020-05-22	0.0821857		0.08	0.0944521	0.0229247	0.0014409	0.0014409	0.136393	0.08	0.917814	1.04886	112000	0.0441635	1.15741	0.984771	0.997997	1.06277	0.0014409	0.00198752	0.00144927	00:00:00	96726.2	2022-11-10	2020-05-22	0
2020-05-23	1.90534e+06	0			0	243873	529500	2.85801e+07	42461.8	1.15885		0	2020-05-23	0.084059		0.08	0.0957145	0.0233603	0.00143738	0.00143738	0.137079	0.08	0.915941	1.04886	112300	0.0440752	1.15839	0.984771	0.997959	1.06144	0.00143738	0.00198089	0.00144572	00:00:00	98955.4	2022-11-10	2020-05-23	0
2020-05-24	1.94851e+06	0			0	248213	539266	2.92276e+07	43172.5	1.15965		0	2020-05-24	0.0859636		0.08	0.0969641	0.0237911	0.00143395	0.00143395	0.137673	0.08	0.914036	1.04886	112600	0.043987	1.15925	0.984771	0.997921	1.05997	0.00143395	0.00197433	0.00144225	00:00:00	101222	2022-11-10	2020-05-24	0
2020-05-25	1.99239e+06	0			0.4	252542	549047	2.98858e+07	43875.8	1.16035		0	2020-05-25	0.0878993		0.08	0.0981964	0.0242227	0.00143058	0.00143058	0.138189	0.08	0.912101	1.04886	112900	0.0438991	1.16	0.984771	0.997882	1.05835	0.00143058	0.00196781	0.00143884	00:00:00	103525	2022-11-10	2020-05-25	0
2020-05-26	2.03695e+06	0			0	256838	558899	3.05543e+07	44569.7	1.16095		0	2020-05-26	0.0898657		0.08	0.0994029	0.0246573	0.00142725	0.00142725	0.138637	0.08	0.910134	1.04886	113200	0.0438113	1.16065	0.984771	0.997844	1.05662	0.00142725	0.00196135	0.00143547	00:00:00	105865	2022-11-10	2020-05-26	0
2020-05-27	2.08221e+06	0			0.4	261074	568841	3.12331e+07	45250.6	1.16148		0	2020-05-27	0.091862		0.08	0.100574	0.0250959	0.00142396	0.00142396	0.139026	0.08	0.908138	1.04886	113500	0.0437236	1.16121	0.984771	0.997807	1.05478	0.00142396	0.00195492	0.00143213	00:00:00	108241	2022-11-10	2020-05-27	0
2020-05-28	2.12812e+06	0			0	265244	578851	3.19218e+07	45913.9	1.16193		0	2020-05-28	0.0938876		0.08	0.101707	0.0255375	0.00142068	0.00142068	0.139363	0.08	0.906112	1.04886	113800	0.0436362	1.1617	0.984771	0.997769	1.05284	0.00142068	0.00194852	0.00142882	00:00:00	110652	2022-11-10	2020-05-28	0
2020-05-29	2.17468e+06	0			0.4	269342	588744	3.26202e+07	46559.1	1.16233		0	2020-05-29	0.0959417		0.08	0.1028	0.025974	0.00141743	0.00141743	0.139656	0.08	0.904058	1.04886	114100	0.0435489	1.16213	0.984771	0.997733	1.05081	0.00141743	0.00194217	0.00142553	00:00:00	113096	2022-11-10	2020-05-29	0
2020-05-30	2.22186e+06	0			0	273354	598522	3.3328e+07	47185.1	1.16267		0	2020-05-30	0.0980234		0.08	0.10385	0.0264054	0.00141419	0.00141419	0.139911	0.08	0.901977	1.04886	114400	0.0434618	1.1625	0.984771	0.997697	1.0487	0.00141419	0.00193584	0.00142226	00:00:00	115573	2022-11-10	2020-05-30	0
2020-05-31	2.26965e+06	0			0	277269	608190	3.40448e+07	47790.1	1.16297		0	2020-05-31	0.100132		0.08	0.104852	0.0268319	0.00141097	0.00141097	0.140132	0.08	0.899868	1.04886	114700	0.0433749	1.16282	0.984771	0.997662	1.04652	0.00141097	0.00192954	0.001419	00:00:00	118082	2022-11-10	2020-05-31	0
2020-06-01	2.31984e+06	0			0.4	282881	619540	3.47975e+07	50182.2	1.20676		0	2020-06-01	0.102346		0.2	0.106482	0.0273326	0.00140777	0.00140777	0.171337	0.2	0.897654	1.04886	115000	0.0432881	1.18487	0.984771	0.99754	1.08326	0.00140777	0.00192327	0.00141575	00:00:00	120717	2022-11-10	2020-06-01	0
2020-06-02	2.37138e+06	0			0	289173	631535	3.55707e+07	51542.2	1.21787		0	2020-06-02	0.10462		0.2	0.10835	0.0278619	0.00140457	0.00140457	0.178895	0.2	0.89538	1.04886	115300	0.0432016	1.21232	0.984771	0.997467	1.09046	0.00140457	0.00191703	0.00141251	00:00:00	123423	2022-11-10	2020-06-02	0
2020-06-03	2.42453e+06	0			0.4	296410	644412	3.63679e+07	53150.7	1.23167		0	2020-06-03	0.106965		0.2	0.110551	0.02843	0.00140138	0.00140138	0.188096	0.2	0.893035	1.04886	115600	0.0431152	1.22477	0.984771	0.997381	1.09993	0.00140138	0.00191082	0.00140929	00:00:00	126213	2022-11-10	2020-06-03	0
2020-06-04	2.47962e+06	0			0	304946	658493	3.71944e+07	55095.9	1.24885		0	2020-06-04	0.109395		0.2	0.113214	0.0290512	0.00139821	0.00139821	0.199262	0.2	0.890605	1.04886	115900	0.0430289	1.24026	0.984771	0.997278	1.11223	0.00139821	0.00190463	0.00140608	00:00:00	129106	2022-11-10	2020-06-04	0
2020-06-05	2.53663e+06	0			0.4	314766	673754	3.80494e+07	57004.6	1.25937		0	2020-06-05	0.11191		0.2	0.116325	0.0297245	0.00139505	0.00139505	0.205952	0.2	0.88809	1.04886	116200	0.0429429	1.25411	0.984771	0.997176	1.11843	0.00139505	0.00189848	0.00140288	00:00:00	132098	2022-11-10	2020-06-05	0
2020-06-06	2.59579e+06	0			0	326133	690450	3.89368e+07	59157.4	1.26974		0	2020-06-06	0.11452		0.2	0.119975	0.030461	0.00139189	0.00139189	0.21244	0.2	0.88548	1.04886	116500	0.042857	1.26456	0.984771	0.997061	1.12433	0.00139189	0.00189235	0.00139969	00:00:00	135204	2022-11-10	2020-06-06	0
2020-06-07	2.65736e+06	0			0	337523	708849	3.98604e+07	61571.8	1.27926		0	2020-06-07	0.117236		0.2	0.123598	0.0312728	0.00138875	0.00138875	0.218299	0.2	0.882764	1.04886	116800	0.0427713	1.2745	0.984771	0.996932	1.12929	0.00138875	0.00188625	0.00139651	00:00:00	138437	2022-11-10	2020-06-07	0
2020-06-08	2.72126e+06	0			0.4	349885	728878	4.08189e+07	63904.2	1.28687		0	2020-06-08	0.120056		0.2	0.127541	0.0321564	0.00138562	0.00138562	0.222918	0.2	0.879944	1.04886	117100	0.0426857	1.28306	0.984771	0.996806	1.13237	0.00138562	0.00188017	0.00139334	00:00:00	141792	2022-11-10	2020-06-08	0
2020-06-09	2.78765e+06	0			0	363120	750694	4.18147e+07	66385.8	1.29374		0	2020-06-09	0.122984		0.2	0.131763	0.0331188	0.0013825	0.0013825	0.227047	0.2	0.877016	1.04886	117400	0.0426004	1.2903	0.984771	0.996672	1.13463	0.0013825	0.00187412	0.00139018	00:00:00	145277	2022-11-10	2020-06-09	0
2020-06-10	2.85663e+06	0			0.4	377010	774429	4.28495e+07	68986.1	1.29974		0	2020-06-10	0.126028		0.2	0.136182	0.034166	0.00137938	0.00137938	0.230614	0.2	0.873972	1.04886	117700	0.0425152	1.29674	0.984771	0.99653	1.13593	0.00137938	0.0018681	0.00138703	00:00:00	148899	2022-11-10	2020-06-10	0
2020-06-11	2.92829e+06	0			0	391663	800173	4.39244e+07	71657.5	1.30486		0	2020-06-11	0.129189		0.2	0.140833	0.0353017	0.00137628	0.00137628	0.233632	0.2	0.870811	1.04886	118000	0.0424301	1.3023	0.984771	0.996383	1.13628	0.00137628	0.00186211	0.00138389	00:00:00	152661	2022-11-10	2020-06-11	0
2020-06-12	3.00272e+06	0			0.4	406934	828043	4.50408e+07	74429	1.30935		0	2020-06-12	0.132473		0.2	0.145661	0.0365313	0.00137318	0.00137318	0.236265	0.2	0.867527	1.04886	118300	0.0423453	1.30711	0.984771	0.996229	1.1359	0.00137318	0.00185614	0.00138076	00:00:00	156568	2022-11-10	2020-06-12	0
2020-06-13	3.07999e+06	0			0	422632	858127	4.61999e+07	77269.2	1.31326		0	2020-06-13	0.135882		0.2	0.150596	0.0378585	0.0013701	0.0013701	0.238535	0.2	0.864118	1.04886	118600	0.0422606	1.31131	0.984771	0.996071	1.13481	0.0013701	0.00185019	0.00137764	00:00:00	160625	2022-11-10	2020-06-13	0
2020-06-14	3.16013e+06	0			0	438868	890477	4.7402e+07	80140.3	1.31664		0	2020-06-14	0.139418		0.2	0.155675	0.0392857	0.00136703	0.00136703	0.24049	0.2	0.860582	1.04886	118900	0.0421761	1.31495	0.984771	0.995908	1.13308	0.00136703	0.00184428	0.00137452	00:00:00	164832	2022-11-10	2020-06-14	0
2020-06-15	3.24319e+06	0			0.4	455546	923359	4.86479e+07	83063.9	1.31958		0	2020-06-15	0.143082		0.2	0.160862	0.0407364	0.00136396	0.00136396	0.242186	0.2	0.856918	1.04886	119200	0.0420917	1.31811	0.984771	0.995742	1.13078	0.00136396	0.00183839	0.00137142	00:00:00	169193	2022-11-10	2020-06-15	0
2020-06-16	3.32921e+06	0			0	472580	957836	4.99382e+07	86019.8	1.32214		0	2020-06-16	0.146877		0.2	0.166125	0.0422575	0.00136091	0.00136091	0.243652	0.2	0.853123	1.04886	119500	0.0420075	1.32086	0.984771	0.995571	1.12795	0.00136091	0.00183252	0.00136833	00:00:00	173709	2022-11-10	2020-06-16	0
2020-06-17	3.4182e+06	0			0.4	489912	993676	5.12731e+07	88990.2	1.32436		0	2020-06-17	0.150803		0.2	0.171443	0.0438386	0.00135786	0.00135786	0.24492	0.2	0.849197	1.04886	119800	0.0419235	1.32325	0.984771	0.995398	1.12464	0.00135786	0.00182668	0.00136525	00:00:00	178381	2022-11-10	2020-06-17	0
2020-06-18	3.51017e+06	0			0	507447	1.03054e+06	5.26525e+07	91963.4	1.32629		0	2020-06-18	0.15486		0.2	0.176781	0.0454651	0.00135482	0.00135482	0.246019	0.2	0.84514	1.04886	120100	0.0418397	1.32533	0.984771	0.995222	1.1209	0.00135482	0.00182086	0.00136218	00:00:00	183209	2022-11-10	2020-06-18	0
2020-06-19	3.60509e+06	0			0.4	525097	1.06846e+06	5.40763e+07	94919.7	1.32797		0	2020-06-19	0.159048		0.2	0.182109	0.0471379	0.0013518	0.0013518	0.246971	0.2	0.840952	1.04886	120400	0.041756	1.32713	0.984771	0.995045	1.11676	0.0013518	0.00181507	0.00135912	00:00:00	188192	2022-11-10	2020-06-19	0
2020-06-20	3.70293e+06	0			0	542799	1.10714e+06	5.55439e+07	97841.8	1.32943		0	2020-06-20	0.163365		0.2	0.187405	0.0488445	0.00134878	0.00134878	0.247797	0.2	0.836635	1.04886	120700	0.0416725	1.3287	0.984771	0.994867	1.11225	0.00134878	0.00180931	0.00135606	00:00:00	193329	2022-11-10	2020-06-20	0
2020-06-21	3.80365e+06	0			0	560452	1.14629e+06	5.70547e+07	100717	1.33069		0	2020-06-21	0.167808		0.2	0.192634	0.0505715	0.00134577	0.00134577	0.248513	0.2	0.832192	1.04886	121000	0.0415891	1.33006	0.984771	0.994689	1.10739	0.00134577	0.00180357	0.00135302	00:00:00	198617	2022-11-10	2020-06-21	0
2020-06-22	3.90717e+06	0			0.4	577958	1.18591e+06	5.86076e+07	103526	1.33179		0	2020-06-22	0.172375		0.2	0.197763	0.0523195	0.00134277	0.00134277	0.249134	0.2	0.827625	1.04886	121300	0.0415059	1.33124	0.984771	0.994512	1.10223	0.00134277	0.00179785	0.00134998	00:00:00	204052	2022-11-10	2020-06-22	0
2020-06-23	4.01342e+06	0			0	595217	1.22577e+06	6.02013e+07	106250	1.33275		0	2020-06-23	0.177063		0.2	0.20276	0.0540782	0.00133978	0.00133978	0.249672	0.2	0.822937	1.04886	121600	0.0414229	1.33227	0.984771	0.994336	1.09677	0.00133978	0.00179216	0.00134696	00:00:00	209630	2022-11-10	2020-06-23	0
2020-06-24	4.12229e+06	0			0.4	612124	1.26566e+06	6.18344e+07	108871	1.33358		0	2020-06-24	0.181866		0.2	0.20759	0.0558378	0.0013368	0.0013368	0.25014	0.2	0.818134	1.04886	121900	0.0413401	1.33317	0.984771	0.994163	1.09105	0.0013368	0.00178649	0.00134394	00:00:00	215346	2022-11-10	2020-06-24	0
2020-06-25	4.23366e+06	0			0	628574	1.30537e+06	6.35049e+07	111370	1.3343		0	2020-06-25	0.186779		0.2	0.212221	0.0575898	0.00133383	0.00133383	0.250545	0.2	0.813221	1.04886	122200	0.0412574	1.33394	0.984771	0.993994	1.08508	0.00133383	0.00178085	0.00134094	00:00:00	221192	2022-11-10	2020-06-25	0
2020-06-26	4.34739e+06	0			0.4	644462	1.34467e+06	6.52109e+07	113729	1.33493		0	2020-06-26	0.191797		0.2	0.216618	0.0593237	0.00133086	0.00133086	0.250897	0.2	0.808203	1.04886	122500	0.0411749	1.33462	0.984771	0.99383	1.0789	0.00133086	0.00177523	0.00133794	00:00:00	227163	2022-11-10	2020-06-26	0
2020-06-27	4.46332e+06	0			0	659677	1.38333e+06	6.69498e+07	115932	1.33548		0	2020-06-27	0.196911		0.2	0.220747	0.0610294	0.00132791	0.00132791	0.251203	0.2	0.803089	1.04886	122800	0.0410925	1.3352	0.984771	0.993672	1.0725	0.00132791	0.00176963	0.00133495	00:00:00	233250	2022-11-10	2020-06-27	0
2020-06-28	4.58128e+06	0			0	674110	1.42115e+06	6.87192e+07	117960	1.33595		0	2020-06-28	0.202115		0.2	0.224578	0.0626979	0.00132497	0.00132497	0.251468	0.2	0.797885	1.04886	123100	0.0410104	1.33571	0.984771	0.99352	1.06593	0.00132497	0.00176406	0.00133197	00:00:00	239443	2022-11-10	2020-06-28	0
2020-06-29	4.70108e+06	0			0.4	687657	1.45788e+06	7.05162e+07	119796	1.33636		0	2020-06-29	0.207401		0.2	0.228077	0.0643184	0.00132203	0.00132203	0.251699	0.2	0.792599	1.04886	123400	0.0409283	1.33615	0.984771	0.993376	1.0592	0.00132203	0.00175852	0.001329	00:00:00	245732	2022-11-10	2020-06-29	0
2020-06-30	4.82251e+06	0			0	700213	1.49329e+06	7.23376e+07	121427	1.33672		0	2020-06-30	0.212758		0.2	0.231215	0.0658805	0.0013191	0.0013191	0.251899	0.2	0.787242	1.04886	123700	0.0408465	1.33654	0.984771	0.993241	1.05232	0.0013191	0.00175299	0.00132604	00:00:00	252107	2022-11-10	2020-06-30	0
2020-07-01	4.94534e+06	0			0.4	711680	1.52714e+06	7.41801e+07	122837	1.33703		0	2020-07-01	0.218177		0.2	0.233964	0.0673737	0.00131618	0.00131618	0.252072	0.2	0.781823	1.04886	124000	0.0407648	1.33687	0.984771	0.993116	1.04532	0.00131618	0.00174749	0.00132309	00:00:00	258556	2022-11-10	2020-07-01	0
2020-07-02	5.06936e+06	0			0	721965	1.55919e+06	7.60403e+07	124014	1.3373		0	2020-07-02	0.223648		0.2	0.236298	0.0687877	0.00131328	0.00131328	0.252223	0.2	0.776352	1.04886	124300	0.0406833	1.33716	0.984771	0.993002	1.03821	0.00131328	0.00174201	0.00132015	00:00:00	265066	2022-11-10	2020-07-02	0
2020-07-03	5.1943e+06	0			0.4	730980	1.58922e+06	7.79146e+07	124947	1.33753		0	2020-07-03	0.22916		0.2	0.238196	0.0701125	0.00131037	0.00131037	0.252354	0.2	0.77084	1.04886	124600	0.0406019	1.33741	0.984771	0.9929	1.03102	0.00131037	0.00173656	0.00131721	00:00:00	271626	2022-11-10	2020-07-03	0
2020-07-04	5.31993e+06	0			0	738650	1.617e+06	7.9799e+07	125629	1.33774		0	2020-07-04	0.234703		0.2	0.239636	0.0713384	0.00130748	0.00130748	0.252468	0.2	0.765297	1.04886	124900	0.0405207	1.33763	0.984771	0.99281	1.02377	0.00130748	0.00173112	0.00131429	00:00:00	278222	2022-11-10	2020-07-04	0
2020-07-05	5.44598e+06	0			0	744904	1.64234e+06	8.16897e+07	126051	1.33791		0	2020-07-05	0.240264		0.2	0.240604	0.072456	0.0013046	0.0013046	0.252567	0.2	0.759736	1.04886	125200	0.0404396	1.33782	0.984771	0.992733	1.01646	0.0013046	0.00172572	0.00131137	00:00:00	284839	2022-11-10	2020-07-05	0
2020-07-06	5.57219e+06	0			0.4	749686	1.66502e+06	8.35829e+07	126209	1.33807		0	2020-07-06	0.245832		0.2	0.241087	0.0734567	0.00130173	0.00130173	0.252653	0.2	0.754168	1.04886	125500	0.0403588	1.33799	0.984771	0.992671	1.00913	0.00130173	0.00172033	0.00130847	00:00:00	291465	2022-11-10	2020-07-06	0
2020-07-07	5.69829e+06	0			0	752950	1.68487e+06	8.54744e+07	126101	1.3382		0	2020-07-07	0.251395		0.2	0.241076	0.0743325	0.00129886	0.00129886	0.252728	0.2	0.748605	1.04886	125800	0.0402781	1.33813	0.984771	0.992623	1.00178	0.00129886	0.00171496	0.00130557	00:00:00	298086	2022-11-10	2020-07-07	0
2020-07-08	5.82402e+06	0			0.4	754663	1.70173e+06	8.73603e+07	125726	1.33832		0	2020-07-08	0.256942		0.2	0.240567	0.0750762	0.001296	0.001296	0.252792	0.2	0.743058	1.04886	126100	0.0401975	1.33826	0.984771	0.992591	0.994447	0.001296	0.00170962	0.00130268	00:00:00	304686	2022-11-10	2020-07-08	0
2020-07-09	5.94911e+06	0			0	754803	1.71544e+06	8.92366e+07	125088	1.33842		0	2020-07-09	0.262461		0.2	0.239561	0.0756814	0.00129316	0.00129316	0.252849	0.2	0.737539	1.04886	126400	0.0401171	1.33837	0.984771	0.992573	0.987135	0.00129316	0.0017043	0.0012998	00:00:00	311253	2022-11-10	2020-07-09	0
2020-07-10	6.0733e+06	0			0.4	753365	1.72591e+06	9.10995e+07	124190	1.3385		0	2020-07-10	0.26794		0.2	0.238061	0.0761429	0.00129032	0.00129032	0.252898	0.2	0.73206	1.04886	126700	0.0400369	1.33846	0.984771	0.992571	0.979866	0.00129032	0.001699	0.00129693	00:00:00	317773	2022-11-10	2020-07-10	0
2020-07-11	6.19634e+06	0			0	750354	1.73301e+06	9.2945e+07	123040	1.33858		0	2020-07-11	0.273368		0.2	0.236077	0.0764565	0.00128748	0.00128748	0.25294	0.2	0.726632	1.04886	127000	0.0399568	1.33854	0.984771	0.992585	0.972656	0.00128748	0.00169373	0.00129406	00:00:00	324233	2022-11-10	2020-07-11	0
2020-07-12	6.31798e+06	0			0	745790	1.7367e+06	9.47697e+07	121645	1.33865		0	2020-07-12	0.278734		0.2	0.23362	0.0766191	0.00128466	0.00128466	0.252977	0.2	0.721266	1.04886	127300	0.0398769	1.33861	0.984771	0.992614	0.96552	0.00128466	0.00168848	0.00129121	00:00:00	330619	2022-11-10	2020-07-12	0
2020-07-13	6.438e+06	0			0.4	739708	1.73692e+06	9.657e+07	120018	1.3387		0	2020-07-13	0.284029		0.2	0.230707	0.0766289	0.00128185	0.00128185	0.253009	0.2	0.715971	1.04886	127600	0.0397971	1.33868	0.984771	0.992659	0.958473	0.00128185	0.00168324	0.00128836	00:00:00	336920	2022-11-10	2020-07-13	0
2020-07-14	6.55617e+06	0			0.4	732151	1.73366e+06	9.83425e+07	118169	1.33875		0	2020-07-14	0.289243		0.2	0.227359	0.0764852	0.00127904	0.00127904	0.253037	0.2	0.710757	1.04886	127900	0.0397175	1.33873	0.984771	0.992718	0.951529	0.00127904	0.00167803	0.00128552	00:00:00	343124	2022-11-10	2020-07-14	0
2020-07-15	6.677e+06	0			0.4	727896	1.73166e+06	1.00155e+08	120834	1.39322		0	2020-07-15	0.294574		0.35	0.225058	0.0763968	0.00127624	0.00127624	0.282236	0.35	0.705426	1.04886	128200	0.0396381	1.36599	0.984771	0.9925	0.982811	0.00127624	0.00167284	0.0012827	00:00:00	349468	2022-11-10	2020-07-15	0
2020-07-16	6.7974e+06	0			0.4	724104	1.72805e+06	1.01961e+08	120398	1.40686		0	2020-07-16	0.299885		0.35	0.222916	0.0762373	0.00127345	0.00127345	0.289196	0.35	0.700115	1.04886	128500	0.0395588	1.40004	0.984771	0.99247	0.984962	0.00127345	0.00166768	0.00127987	00:00:00	355789	2022-11-10	2020-07-16	0
2020-07-17	6.91771e+06	0			0.4	721373	1.72341e+06	1.03766e+08	120309	1.4239		0	2020-07-17	0.305193		0.35	0.221115	0.0760326	0.00127067	0.00127067	0.297702	0.35	0.694807	1.04886	128800	0.0394797	1.41538	0.984771	0.992419	0.989333	0.00127067	0.00166253	0.00127706	00:00:00	362105	2022-11-10	2020-07-17	0
2020-07-18	7.03843e+06	0			0.4	720453	1.7185e+06	1.05577e+08	120725	1.44518		0	2020-07-18	0.310519		0.35	0.219879	0.0758163	0.0012679	0.0012679	0.308045	0.35	0.689481	1.04886	129100	0.0394007	1.43454	0.984771	0.992334	0.996425	0.0012679	0.0016574	0.00127426	00:00:00	368443	2022-11-10	2020-07-18	0
2020-07-19	7.15916e+06	0			0.4	721157	1.71317e+06	1.07387e+08	120722	1.45817		0	2020-07-19	0.315845		0.35	0.219144	0.0755812	0.00126513	0.00126513	0.31421	0.35	0.684155	1.04886	129400	0.0393219	1.45168	0.984771	0.992275	0.997616	0.00126513	0.0016523	0.00127146	00:00:00	374781	2022-11-10	2020-07-19	0
2020-07-20	7.28012e+06	0			0.4	723948	1.70793e+06	1.09202e+08	120961	1.471		0	2020-07-20	0.321182		0.35	0.219045	0.0753497	0.00126238	0.00126238	0.320191	0.35	0.678818	1.04886	129700	0.0392433	1.46459	0.984771	0.9922	0.998543	0.00126238	0.00164722	0.00126868	00:00:00	381131	2022-11-10	2020-07-20	0
2020-07-21	7.40156e+06	0			0.4	724561	1.70327e+06	1.11023e+08	121447	1.48278		0	2020-07-21	0.32654		0.35	0.218287	0.0751444	0.00125963	0.00125963	0.32559	0.35	0.67346	1.04886	130000	0.0391648	1.47689	0.984771	0.992107	0.998593	0.00125963	0.00164215	0.0012659	00:00:00	387507	2022-11-10	2020-07-21	0
2020-07-22	7.52292e+06	0			0.4	725518	1.6989e+06	1.12844e+08	121355	1.49218		0	2020-07-22	0.331893		0.35	0.217636	0.0749515	0.00125689	0.00125689	0.329839	0.35	0.668107	1.04886	130300	0.0390865	1.48748	0.984771	0.99205	0.996934	0.00125689	0.00163711	0.00126313	00:00:00	393878	2022-11-10	2020-07-22	0
2020-07-23	7.64415e+06	0			0.4	726445	1.69505e+06	1.14662e+08	121236	1.50068		0	2020-07-23	0.337242		0.35	0.216978	0.0747815	0.00125416	0.00125416	0.333635	0.35	0.662758	1.04886	130600	0.0390083	1.49643	0.984771	0.991994	0.994587	0.00125416	0.00163209	0.00126036	00:00:00	400243	2022-11-10	2020-07-23	0
2020-07-24	7.76517e+06	0			0.4	726734	1.69187e+06	1.16478e+08	121014	1.5081		0	2020-07-24	0.342581		0.35	0.216134	0.0746414	0.00125143	0.00125143	0.336913	0.35	0.657419	1.04886	130900	0.0389303	1.50439	0.984771	0.991944	0.991452	0.00125143	0.00162709	0.00125761	00:00:00	406597	2022-11-10	2020-07-24	0
2020-07-25	7.88576e+06	0			0.4	726603	1.68942e+06	1.18286e+08	120591	1.51443		0	2020-07-25	0.347901		0.35	0.21517	0.0745334	0.00124872	0.00124872	0.339685	0.35	0.652099	1.04886	131200	0.0388524	1.51126	0.984771	0.991907	0.987557	0.00124872	0.00162211	0.00125486	00:00:00	412928	2022-11-10	2020-07-25	0
2020-07-26	8.00579e+06	0			0.4	725675	1.68781e+06	1.20087e+08	120033	1.51999		0	2020-07-26	0.353197		0.35	0.213976	0.0744622	0.00124601	0.00124601	0.342101	0.35	0.646803	1.04886	131500	0.0387747	1.51721	0.984771	0.991879	0.983135	0.00124601	0.00161715	0.00125213	00:00:00	419229	2022-11-10	2020-07-26	0
2020-07-27	8.12508e+06	0			0.4	723512	1.68708e+06	1.21876e+08	119284	1.52482		0	2020-07-27	0.358459		0.35	0.212427	0.0744299	0.00124331	0.00124331	0.344184	0.35	0.641541	1.04886	131800	0.0386972	1.5224	0.984771	0.991864	0.978233	0.00124331	0.0016122	0.0012494	00:00:00	425492	2022-11-10	2020-07-27	0
2020-07-28	8.24336e+06	0			0.4	720441	1.68719e+06	1.2365e+08	118284	1.529		0	2020-07-28	0.363678		0.35	0.210623	0.0744349	0.00124062	0.00124062	0.345977	0.35	0.636322	1.04886	132100	0.0386198	1.52691	0.984771	0.991866	0.972936	0.00124062	0.00160728	0.00124667	00:00:00	431702	2022-11-10	2020-07-28	0
2020-07-29	8.36046e+06	0			0.4	716308	1.68346e+06	1.25407e+08	117102	1.53264		0	2020-07-29	0.368844		0.35	0.208522	0.0742703	0.00123793	0.00123793	0.347531	0.35	0.631156	1.04886	132400	0.0385425	1.53082	0.984771	0.991881	0.967336	0.00123793	0.00160238	0.00124396	00:00:00	437850	2022-11-10	2020-07-29	0
2020-07-30	8.47619e+06	0			0.4	711017	1.67878e+06	1.27143e+08	115723	1.5358		0	2020-07-30	0.373949		0.35	0.206101	0.074064	0.00123526	0.00123526	0.348875	0.35	0.626051	1.04886	132700	0.0384655	1.53422	0.984771	0.991911	0.961491	0.00123526	0.0015975	0.00124125	00:00:00	443925	2022-11-10	2020-07-30	0
2020-07-31	8.59033e+06	0			0.4	704569	1.67262e+06	1.28855e+08	114143	1.53855		0	2020-07-31	0.378985		0.35	0.203364	0.073792	0.00123259	0.00123259	0.350037	0.35	0.621015	1.04886	133000	0.0383885	1.53718	0.984771	0.991956	0.955462	0.00123259	0.00159264	0.00123856	00:00:00	449918	2022-11-10	2020-07-31	0
2020-08-01	8.7027e+06	0			0.4	696909	1.66427e+06	1.30541e+08	112372	1.54094		0	2020-08-01	0.383943		0.35	0.200299	0.0734235	0.00122993	0.00122993	0.351045	0.35	0.616057	1.04886	133300	0.0383118	1.53974	0.984771	0.992017	0.949306	0.00122993	0.0015878	0.00123587	00:00:00	455817	2022-11-10
2020-08-02	8.81311e+06	0			0.4	688037	1.65396e+06	1.32197e+08	110412	1.54301		0	2020-08-02	0.388814		0.35	0.19691	0.0729687	0.00122727	0.00122727	0.351917	0.35	0.611186	1.04886	133600	0.0382351	1.54198	0.984771	0.992093	0.943068	0.00122727	0.00158297	0.00123318	00:00:00	461614	2022-11-10
2020-08-03	8.92138e+06	0			0.4	678023	1.64127e+06	1.33821e+08	108271	1.54481		0	2020-08-03	0.39359		0.35	0.193222	0.0724088	0.00122463	0.00122463	0.352673	0.35	0.60641	1.04886	133900	0.0381587	1.54391	0.984771	0.992185	0.93679	0.00122463	0.00157817	0.00123051	00:00:00	467298	2022-11-10
2020-08-04	9.02735e+06	0			0.4	666889	1.62579e+06	1.3541e+08	105968	1.54638		0	2020-08-04	0.398266		0.35	0.189245	0.0717259	0.00122199	0.00122199	0.353329	0.35	0.601734	1.04886	134200	0.0380823	1.5456	0.984771	0.992291	0.93051	0.00122199	0.00157338	0.00122784	00:00:00	472861	2022-11-10
2020-08-05	9.13087e+06	0			0.4	654682	1.60795e+06	1.36963e+08	103516	1.54774		0	2020-08-05	0.402832		0.35	0.184996	0.0709389	0.00121936	0.00121936	0.353897	0.35	0.597168	1.04886	134500	0.0380062	1.54706	0.984771	0.992411	0.924261	0.00121936	0.00156862	0.00122518	00:00:00	478296	2022-11-10
2020-08-06	9.23179e+06	0			0.4	641465	1.58764e+06	1.38477e+08	100926	1.54892		0	2020-08-06	0.407285		0.35	0.180496	0.0700429	0.00121674	0.00121674	0.35439	0.35	0.592715	1.04886	134800	0.0379302	1.54833	0.984771	0.992544	0.91807	0.00121674	0.00156387	0.00122253	00:00:00	483594	2022-11-10
2020-08-07	9.33001e+06	0			0.4	627309	1.56484e+06	1.3995e+08	98216.7	1.54995		0	2020-08-07	0.411618		0.35	0.175769	0.0690371	0.00121412	0.00121412	0.354818	0.35	0.588382	1.04886	135100	0.0378543	1.54944	0.984771	0.992689	0.911963	0.00121412	0.00155914	0.00121989	00:00:00	488751	2022-11-10
2020-08-08	9.42541e+06	0			0.4	612299	1.53965e+06	1.41381e+08	95402	1.55084		0	2020-08-08	0.415827		0.35	0.170841	0.0679259	0.00121152	0.00121152	0.355189	0.35	0.584173	1.04886	135400	0.0377786	1.5504	0.984771	0.992847	0.90596	0.00121152	0.00155443	0.00121725	00:00:00	493759	2022-11-10
2020-08-09	9.51791e+06	0			0.4	596528	1.51212e+06	1.42769e+08	92499.4	1.55162		0	2020-08-09	0.419908		0.35	0.16574	0.0667112	0.00120892	0.00120892	0.355512	0.35	0.580092	1.04886	135700	0.037703	1.55123	0.984771	0.993014	0.900082	0.00120892	0.00154974	0.00121463	00:00:00	498616	2022-11-10
2020-08-10	9.60744e+06	0			0.4	580086	1.48236e+06	1.44112e+08	89526.2	1.55229		0	2020-08-10	0.423858		0.35	0.160495	0.0653983	0.00120632	0.00120632	0.355791	0.35	0.576142	1.04886	136000	0.0376276	1.55196	0.984771	0.993191	0.894341	0.00120632	0.00154507	0.00121201	00:00:00	503316	2022-11-10
2020-08-11	9.69394e+06	0			0.4	563069	1.45058e+06	1.45409e+08	86498.5	1.55288		0	2020-08-11	0.427674		0.35	0.155133	0.063996	0.00120374	0.00120374	0.356034	0.35	0.572326	1.04886	136300	0.0375524	1.55258	0.984771	0.993376	0.888753	0.00120374	0.00154042	0.00120939	00:00:00	507857	2022-11-10
2020-08-12	9.77737e+06	0			0.4	545575	1.41691e+06	1.46661e+08	83432.2	1.55339		0	2020-08-12	0.431355		0.35	0.149683	0.0625106	0.00120116	0.00120116	0.356245	0.35	0.568645	1.04886	136600	0.0374773	1.55313	0.984771	0.993569	0.883326	0.00120116	0.00153578	0.00120679	00:00:00	512237	2022-11-10
2020-08-13	9.85771e+06	0			0.4	527701	1.38153e+06	1.47866e+08	80343	1.55383		0	2020-08-13	0.434899		0.35	0.144173	0.0609497	0.00119859	0.00119859	0.356428	0.35	0.565101	1.04886	136900	0.0374023	1.55361	0.984771	0.993767	0.87807	0.00119859	0.00153116	0.00120419	00:00:00	516455	2022-11-10
2020-08-14	9.93496e+06	0			0.4	509545	1.34463e+06	1.49024e+08	77245.5	1.55421		0	2020-08-14	0.438307		0.35	0.13863	0.0593218	0.00119603	0.00119603	0.356587	0.35	0.561693	1.04886	137200	0.0373275	1.55402	0.984771	0.993969	0.87299	0.00119603	0.00152657	0.0012016	00:00:00	520511	2022-11-10
2020-08-15	1.00091e+07	0			0.4	491199	1.30641e+06	1.50137e+08	74153.9	1.55455		0	2020-08-15	0.441578		0.35	0.133081	0.0576357	0.00119347	0.00119347	0.356725	0.35	0.558422	1.04886	137500	0.0372529	1.55438	0.984771	0.994176	0.868092	0.00119347	0.00152198	0.00119902	00:00:00	524404	2022-11-10
2020-08-16	1.00802e+07	0			0.4	472754	1.26708e+06	1.51203e+08	71080.9	1.55484		0	2020-08-16	0.444714		0.35	0.127549	0.0559005	0.00119093	0.00119093	0.356845	0.35	0.555286	1.04886	137800	0.0371784	1.55469	0.984771	0.994384	0.863378	0.00119093	0.00151742	0.00119644	00:00:00	528135	2022-11-10
2020-08-17	1.01482e+07	0			0.4	454294	1.22685e+06	1.52223e+08	68038.6	1.55509		0	2020-08-17	0.447716		0.35	0.122057	0.0541256	0.00118839	0.00118839	0.356949	0.35	0.552284	1.04886	138100	0.037104	1.55496	0.984771	0.994594	0.85885	0.00118839	0.00151288	0.00119388	00:00:00	531707	2022-11-10
2020-08-18	1.02133e+07	0			0.4	435899	1.18592e+06	1.53199e+08	65037.6	1.55531		0	2020-08-18	0.450585		0.35	0.116628	0.0523198	0.00118585	0.00118585	0.35704	0.35	0.549415	1.04886	138400	0.0370298	1.5552	0.984771	0.994805	0.854508	0.00118585	0.00150835	0.00119132	00:00:00	535122	2022-11-10
2020-08-19	1.02754e+07	0			0.4	417644	1.14449e+06	1.5413e+08	62087.5	1.5555		0	2020-08-19	0.453325		0.35	0.111279	0.0504921	0.00118333	0.00118333	0.357119	0.35	0.546675	1.04886	138700	0.0369557	1.5554	0.984771	0.995014	0.850352	0.00118333	0.00150384	0.00118876	00:00:00	538381	2022-11-10
2020-08-20	1.03346e+07	0			0.4	399595	1.10276e+06	1.55018e+08	59197	1.55566		0	2020-08-20	0.455936		0.35	0.106027	0.0486511	0.00118081	0.00118081	0.357187	0.35	0.544064	1.04886	139000	0.0368818	1.55558	0.984771	0.995223	0.846379	0.00118081	0.00149935	0.00118622	00:00:00	541489	2022-11-10
2020-08-21	1.03909e+07	0			0.4	381815	1.06092e+06	1.55864e+08	56373.4	1.55581		0	2020-08-21	0.458423		0.35	0.100889	0.0468051	0.0011783	0.0011783	0.357246	0.35	0.541577	1.04886	139300	0.0368081	1.55573	0.984771	0.995429	0.842588	0.0011783	0.00149487	0.00118368	00:00:00	544449	2022-11-10
2020-08-22	1.04445e+07	0			0.4	364357	1.01914e+06	1.56668e+08	53623.1	1.55593		0	2020-08-22	0.460789		0.35	0.0958772	0.0449619	0.00117579	0.00117579	0.357298	0.35	0.539211	1.04886	139600	0.0367344	1.55587	0.984771	0.995632	0.838975	0.00117579	0.00149041	0.00118115	00:00:00	547264	2022-11-10
2020-08-23	1.04955e+07	0			0.4	347270	977589	1.57433e+08	50951.3	1.55604		0	2020-08-23	0.463037		0.35	0.0910025	0.0431289	0.00117329	0.00117329	0.357342	0.35	0.536963	1.04886	139900	0.036661	1.55598	0.984771	0.995831	0.835536	0.00117329	0.00148597	0.00117862	00:00:00	549939	2022-11-10
2020-08-24	1.05439e+07	0			0.4	330595	936425	1.58158e+08	48362.3	1.55613		0	2020-08-24	0.46517		0.35	0.0862745	0.0413129	0.0011708	0.0011708	0.357381	0.35	0.53483	1.04886	140200	0.0365876	1.55609	0.984771	0.996026	0.832266	0.0011708	0.00148155	0.00117611	00:00:00	552478	2022-11-10
2020-08-25	1.05897e+07	0			0.4	314367	895786	1.58846e+08	45859.5	1.55621		0	2020-08-25	0.467194		0.35	0.0817006	0.03952	0.00116832	0.00116832	0.357415	0.35	0.532806	1.04886	140500	0.0365145	1.55617	0.984771	0.996217	0.829161	0.00116832	0.00147714	0.0011736	00:00:00	554886	2022-11-10
2020-08-26	1.06332e+07	0			0.4	298615	855799	1.59498e+08	43445.4	1.55629		0	2020-08-26	0.46911		0.35	0.0772867	0.0377558	0.00116584	0.00116584	0.357445	0.35	0.53089	1.04886	140800	0.0364414	1.55625	0.984771	0.996403	0.826216	0.00116584	0.00147275	0.00117109	00:00:00	557167	2022-11-10
2020-08-27	1.06743e+07	0			0.4	283363	816578	1.60114e+08	41121.7	1.55635		0	2020-08-27	0.470925		0.35	0.073037	0.0360255	0.00116337	0.00116337	0.35747	0.35	0.529075	1.04886	141100	0.0363686	1.55632	0.984771	0.996583	0.823425	0.00116337	0.00146838	0.0011686	00:00:00	559325	2022-11-10
2020-08-28	1.07132e+07	0			0.4	268630	778222	1.60698e+08	38889.4	1.5564		0	2020-08-28	0.47264		0.35	0.0689543	0.0343333	0.00116091	0.00116091	0.357492	0.35	0.52736	1.04886	141400	0.0362958	1.55637	0.984771	0.996757	0.820783	0.00116091	0.00146403	0.00116611	00:00:00	561367	2022-11-10
2020-08-29	1.07499e+07	0			0.4	254427	740817	1.61249e+08	36748.9	1.55645		0	2020-08-29	0.474262		0.35	0.0650401	0.0326831	0.00115846	0.00115846	0.357511	0.35	0.525738	1.04886	141700	0.0362232	1.55642	0.984771	0.996926	0.818285	0.00115846	0.00145969	0.00116363	00:00:00	563296	2022-11-10
2020-08-30	1.07846e+07	0			0.4	240765	704436	1.61769e+08	34699.9	1.55649		0	2020-08-30	0.475792		0.35	0.0612947	0.031078	0.00115601	0.00115601	0.357528	0.35	0.524208	1.04886	142000	0.0361508	1.55647	0.984771	0.997088	0.815923	0.00115601	0.00145537	0.00116116	00:00:00	565118	2022-11-10
2020-08-31	1.08174e+07	0			0.4	227647	669139	1.62261e+08	32741.7	1.55652		0	2020-08-31	0.477237		0.35	0.0577172	0.0295208	0.00115357	0.00115357	0.357543	0.35	0.522763	1.04886	142300	0.0360785	1.55651	0.984771	0.997244	0.813693	0.00115357	0.00145106	0.00115869	00:00:00	566837	2022-11-10
2020-09-01	1.08504e+07	0			0.4	217233	637133	1.62756e+08	33031.8	1.66539		0	2020-09-01	0.478694		0.65	0.0548512	0.0281088	0.00115113	0.00115113	0.39954	0.65	0.521306	1.04886	142600	0.0360063	1.61096	0.984771	0.997212	0.868177	0.00115113	0.00144677	0.00115623	00:00:00	568571	2022-11-10
2020-09-02	1.08823e+07	0			0.4	208059	606992	1.63235e+08	31946.9	1.69263		0	2020-09-02	0.480104		0.65	0.0523194	0.0267791	0.0011487	0.0011487	0.409202	0.65	0.519896	1.04886	142900	0.0359343	1.67901	0.984771	0.997296	0.87999	0.0011487	0.0014425	0.00115377	00:00:00	570249	2022-11-10
2020-09-03	1.09135e+07	0			0.4	200298	578924	1.63702e+08	31128.5	1.72666		0	2020-09-03	0.481477		0.65	0.0501618	0.0255408	0.00114628	0.00114628	0.420847	0.65	0.518523	1.04886	143200	0.0358624	1.70964	0.984771	0.997358	0.895313	0.00114628	0.00143824	0.00115133	00:00:00	571883	2022-11-10
2020-09-04	1.09441e+07	0			0.4	194173	553175	1.64162e+08	30624.4	1.76919		0	2020-09-04	0.482828		0.65	0.0484292	0.0244048	0.00114387	0.00114387	0.434771	0.65	0.517172	1.04886	143500	0.0357907	1.74793	0.984771	0.997394	0.914977	0.00114387	0.001434	0.00114889	00:00:00	573491	2022-11-10
2020-09-05	1.09741e+07	0			0.4	189518	529597	1.64612e+08	30045	1.79514		0	2020-09-05	0.484154		0.65	0.0470753	0.0233646	0.00114146	0.00114146	0.442942	0.65	0.515846	1.04886	143800	0.0357191	1.78217	0.984771	0.997437	0.926019	0.00114146	0.00142978	0.00114646	00:00:00	575068	2022-11-10
2020-09-06	1.10038e+07	0			0.4	186444	508313	1.65057e+08	29667.2	1.82077		0	2020-09-06	0.485462		0.65	0.0461228	0.0224256	0.00113906	0.00113906	0.450783	0.65	0.514538	1.04886	144100	0.0356477	1.80796	0.984771	0.997463	0.936857	0.00113906	0.00142557	0.00114403	00:00:00	576625	2022-11-10
2020-09-07	1.10333e+07	0			0.4	182900	489438	1.655e+08	29488.1	1.8443		0	2020-09-07	0.486763		0.65	0.0450618	0.0215929	0.00113667	0.00113667	0.45779	0.65	0.513237	1.04886	144400	0.0355764	1.83254	0.984771	0.997472	0.946564	0.00113667	0.00142138	0.00114161	00:00:00	578174	2022-11-10
2020-09-08	1.10624e+07	0			0.4	180101	472727	1.65937e+08	29148.2	1.86308		0	2020-09-08	0.488049		0.65	0.0441917	0.0208556	0.00113428	0.00113428	0.463255	0.65	0.511951	1.04886	144700	0.0355052	1.85369	0.984771	0.997494	0.953805	0.00113428	0.0014172	0.0011392	00:00:00	579704	2022-11-10
2020-09-09	1.10913e+07	0			0.4	177864	458173	1.6637e+08	28891.3	1.88006		0	2020-09-09	0.489324		0.65	0.0434654	0.0202135	0.0011319	0.0011319	0.468103	0.65	0.510676	1.04886	145000	0.0354342	1.87157	0.984771	0.99751	0.960104	0.0011319	0.00141304	0.00113679	00:00:00	581221	2022-11-10
2020-09-10	1.112e+07	0			0.4	175926	445737	1.668e+08	28685.7	1.89489		0	2020-09-10	0.490589		0.65	0.0428171	0.0196649	0.00112952	0.00112952	0.472264	0.65	0.509411	1.04886	145300	0.0353634	1.88748	0.984771	0.997522	0.965276	0.00112952	0.0014089	0.0011344	00:00:00	582727	2022-11-10
2020-09-11	1.11485e+07	0			0.4	174372	435339	1.67228e+08	28491.7	1.90753		0	2020-09-11	0.491846		0.65	0.0422669	0.0192061	0.00112716	0.00112716	0.475763	0.65	0.508154	1.04886	145600	0.0352926	1.90121	0.984771	0.997532	0.96932	0.00112716	0.00140477	0.001132	00:00:00	584222	2022-11-10
2020-09-12	1.11769e+07	0			0.4	173039	426925	1.67653e+08	28334.5	1.91865		0	2020-09-12	0.493096		0.65	0.0417739	0.0188349	0.0011248	0.0011248	0.478799	0.65	0.506904	1.04886	145900	0.0352221	1.91309	0.984771	0.99754	0.972569	0.0011248	0.00140065	0.00112962	00:00:00	585710	2022-11-10
2020-09-13	1.1205e+07	0			0.4	171741	420415	1.68076e+08	28189.8	1.92829		0	2020-09-13	0.49434		0.65	0.0412926	0.0185477	0.00112244	0.00112244	0.481406	0.65	0.50566	1.04886	146200	0.0351516	1.92347	0.984771	0.997547	0.97506	0.00112244	0.00139656	0.00112724	00:00:00	587190	2022-11-10
2020-09-14	1.12331e+07	0			0.4	170624	415704	1.68496e+08	28030.5	1.93664		0	2020-09-14	0.495577		0.65	0.040858	0.0183399	0.00112009	0.00112009	0.483642	0.65	0.504423	1.04886	146500	0.0350813	1.93247	0.984771	0.997554	0.976888	0.00112009	0.00139247	0.00112487	00:00:00	588662	2022-11-10
2020-09-15	1.1261e+07	0			0.4	169617	410556	1.68914e+08	27884.4	1.94392		0	2020-09-15	0.496807		0.65	0.0404528	0.0181128	0.00111775	0.00111775	0.485576	0.65	0.503193	1.04886	146800	0.0350111	1.94028	0.984771	0.997561	0.978167	0.00111775	0.0013884	0.0011225	00:00:00	590126	2022-11-10
2020-09-16	1.12887e+07	0			0.4	168673	406351	1.6933e+08	27742.1	1.95024		0	2020-09-16	0.498031		0.65	0.0400654	0.0179273	0.00111542	0.00111542	0.487242	0.65	0.501969	1.04886	147100	0.0349411	1.94708	0.984771	0.997568	0.97896	0.00111542	0.00138435	0.00112014	00:00:00	591582	2022-11-10
2020-09-17	1.13163e+07	0			0.4	167779	402821	1.69744e+08	27598.1	1.95573		0	2020-09-17	0.499248		0.65	0.0396925	0.0177715	0.00111309	0.00111309	0.488681	0.65	0.500752	1.04886	147400	0.0348712	1.95298	0.984771	0.997574	0.979332	0.00111309	0.00138032	0.00111779	00:00:00	593031	2022-11-10
2020-09-18	1.13438e+07	0			0.4	166897	399649	1.70156e+08	27452.1	1.9605		0	2020-09-18	0.50046		0.65	0.0393248	0.0176316	0.00111077	0.00111077	0.489925	0.65	0.49954	1.04886	147700	0.0348015	1.95811	0.984771	0.997581	0.979347	0.00111077	0.00137629	0.00111545	00:00:00	594472	2022-11-10
2020-09-19	1.1371e+07	0			0.4	166007	396903	1.70566e+08	27299.3	1.96464		0	2020-09-19	0.501664		0.65	0.0389576	0.0175104	0.00110845	0.00110845	0.491001	0.65	0.498336	1.04886	148000	0.0347319	1.96257	0.984771	0.997589	0.979051	0.00110845	0.00137229	0.00111311	00:00:00	595905	2022-11-10
2020-09-20	1.13982e+07	0			0.4	165114	394374	1.70973e+08	27137.8	1.96824		0	2020-09-20	0.502861		0.65	0.0385923	0.0173988	0.00110614	0.00110614	0.491932	0.65	0.497139	1.04886	148300	0.0346624	1.96644	0.984771	0.997597	0.978489	0.00110614	0.00136829	0.00111077	00:00:00	597330	2022-11-10
2020-09-21	1.14252e+07	0			0.4	164199	391855	1.71377e+08	26969.8	1.97137		0	2020-09-21	0.504051		0.65	0.0382245	0.0172877	0.00110384	0.00110384	0.492738	0.65	0.495949	1.04886	148600	0.0345931	1.9698	0.984771	0.997607	0.977698	0.00110384	0.00136432	0.00110845	00:00:00	598746	2022-11-10
2020-09-22	1.1452e+07	0			0.4	163250	389500	1.71779e+08	26793.1	1.97409		0	2020-09-22	0.505233		0.65	0.0378511	0.0171838	0.00110154	0.00110154	0.493437	0.65	0.494767	1.04886	148900	0.0345239	1.97273	0.984771	0.997617	0.976713	0.00110154	0.00136035	0.00110613	00:00:00	600153	2022-11-10
2020-09-23	1.14786e+07	0			0.4	162259	387215	1.72178e+08	26606.6	1.97645		0	2020-09-23	0.506407		0.65	0.0374705	0.017083	0.00109925	0.00109925	0.494042	0.65	0.493593	1.04886	149200	0.0344549	1.97527	0.984771	0.997628	0.975562	0.00109925	0.00135641	0.00110381	00:00:00	601549	2022-11-10
2020-09-24	1.1505e+07	0			0.4	161216	384939	1.72574e+08	26409.6	1.9785		0	2020-09-24	0.507572		0.65	0.0370807	0.0169826	0.00109697	0.00109697	0.494567	0.65	0.492428	1.04886	149500	0.034386	1.97748	0.984771	0.997639	0.974269	0.00109697	0.00135247	0.00110151	00:00:00	602936	2022-11-10
2020-09-25	1.15312e+07	0			0.4	160118	382649	1.72968e+08	26201.6	1.98028		0	2020-09-25	0.508728		0.65	0.036681	0.0168816	0.00109469	0.00109469	0.495022	0.65	0.491272	1.04886	149800	0.0343172	1.97939	0.984771	0.997653	0.972858	0.00109469	0.00134855	0.00109921	00:00:00	604312	2022-11-10
2020-09-26	1.15572e+07	0			0.4	158963	380297	1.73357e+08	25982.4	1.98183		0	2020-09-26	0.509874		0.65	0.0362709	0.0167778	0.00109242	0.00109242	0.495417	0.65	0.490126	1.04886	150100	0.0342486	1.98106	0.984771	0.997667	0.971348	0.00109242	0.00134465	0.00109691	00:00:00	605676	2022-11-10
2020-09-27	1.15829e+07	0			0.4	157745	377860	1.73744e+08	25752.2	1.98318		0	2020-09-27	0.51101		0.65	0.0358494	0.0166703	0.00109015	0.00109015	0.495759	0.65	0.48899	1.04886	150400	0.0341801	1.98251	0.984771	0.997682	0.969754	0.00109015	0.00134076	0.00109462	00:00:00	607028	2022-11-10
2020-09-28	1.16084e+07	0			0.4	156463	375340	1.74126e+08	25510.8	1.98435		0	2020-09-28	0.512136		0.65	0.0354162	0.0165591	0.00108789	0.00108789	0.496057	0.65	0.487864	1.04886	150700	0.0341117	1.98376	0.984771	0.997698	0.968093	0.00108789	0.00133688	0.00109234	00:00:00	608367	2022-11-10
2020-09-29	1.16337e+07	0			0.4	155115	372713	1.74505e+08	25258.1	1.98537		0	2020-09-29	0.51325		0.65	0.0349711	0.0164432	0.00108564	0.00108564	0.496314	0.65	0.48675	1.04886	151000	0.0340435	1.98486	0.984771	0.997716	0.966376	0.00108564	0.00133302	0.00109007	00:00:00	609693	2022-11-10
2020-09-30	1.16587e+07	0			0.4	153699	369966	1.7488e+08	24994.3	1.98625		0	2020-09-30	0.514353		0.65	0.0345142	0.016322	0.00108339	0.00108339	0.496538	0.65	0.485647	1.04886	151300	0.0339754	1.98581	0.984771	0.997735	0.964616	0.00108339	0.00132917	0.0010878	00:00:00	611005	2022-11-10
2020-10-01	1.16834e+07	0			0.4	152217	367087	1.75251e+08	24719.7	1.98702		0	2020-10-01	0.515443		0.65	0.0340455	0.016195	0.00108115	0.00108115	0.496733	0.65	0.484557	1.04886	151600	0.0339074	1.98663	0.984771	0.997754	0.962822	0.00108115	0.00132534	0.00108553	00:00:00	612303	2022-11-10
2020-10-02	1.17078e+07	0			0.4	150670	364070	1.75617e+08	24434.6	1.98768		0	2020-10-02	0.516521		0.65	0.0335655	0.0160619	0.00107892	0.00107892	0.496902	0.65	0.483479	1.04886	151900	0.0338396	1.98735	0.984771	0.997775	0.961002	0.00107892	0.00132152	0.00108328	00:00:00	613586	2022-11-10
2020-10-03	1.1732e+07	0			0.4	149057	360910	1.75979e+08	24139.3	1.98826		0	2020-10-03	0.517586		0.65	0.0330745	0.0159225	0.00107669	0.00107669	0.497048	0.65	0.482414	1.04886	152200	0.0337719	1.98797	0.984771	0.997797	0.959164	0.00107669	0.00131772	0.00108103	00:00:00	614853	2022-11-10
2020-10-04	1.17558e+07	0			0.4	147380	357606	1.76337e+08	23834.3	1.98877		0	2020-10-04	0.518638		0.65	0.0325729	0.0157767	0.00107447	0.00107447	0.497175	0.65	0.481362	1.04886	152500	0.0337044	1.98851	0.984771	0.99782	0.957316	0.00107447	0.00131393	0.00107878	00:00:00	616104	2022-11-10
2020-10-05	1.17793e+07	0			0.4	145642	354157	1.7669e+08	23520.1	1.9892		0	2020-10-05	0.519676		0.65	0.0320613	0.0156246	0.00107225	0.00107225	0.497286	0.65	0.480324	1.04886	152800	0.033637	1.98898	0.984771	0.997844	0.955462	0.00107225	0.00131015	0.00107654	00:00:00	617339	2022-11-10
2020-10-06	1.18025e+07	0			0.4	143845	350561	1.77038e+08	23197.1	1.98958		0	2020-10-06	0.520699		0.65	0.0315404	0.0154659	0.00107004	0.00107004	0.497382	0.65	0.479301	1.04886	153100	0.0335697	1.98939	0.984771	0.997869	0.953609	0.00107004	0.00130638	0.00107431	00:00:00	618557	2022-11-10
2020-10-07	1.18254e+07	0			0.4	141991	346820	1.77381e+08	22865.8	1.98991		0	2020-10-07	0.521708		0.65	0.0310109	0.0153009	0.00106784	0.00106784	0.497465	0.65	0.478292	1.04886	153400	0.0335026	1.98975	0.984771	0.997895	0.95176	0.00106784	0.00130263	0.00107208	00:00:00	619757	2022-11-10
2020-10-08	1.18479e+07	0			0.4	140083	342937	1.77719e+08	22526.8	1.9902		0	2020-10-08	0.522702		0.65	0.0304734	0.0151296	0.00106564	0.00106564	0.497538	0.65	0.477298	1.04886	153700	0.0334356	1.99006	0.984771	0.997922	0.949919	0.00106564	0.0012989	0.00106986	00:00:00	620940	2022-11-10
2020-10-09	1.18701e+07	0			0.4	138125	338916	1.78051e+08	22180.8	1.99045		0	2020-10-09	0.52368		0.65	0.0299289	0.0149522	0.00106344	0.00106344	0.497601	0.65	0.47632	1.04886	154000	0.0333687	1.99032	0.984771	0.99795	0.94809	0.00106344	0.00129518	0.00106765	00:00:00	622105	2022-11-10
2020-10-10	1.18919e+07	0			0.4	136119	334762	1.78379e+08	21828.2	1.99066		0	2020-10-10	0.524643		0.65	0.029378	0.0147689	0.00106126	0.00106126	0.497655	0.65	0.475357	1.04886	154300	0.033302	1.99056	0.984771	0.997978	0.946276	0.00106126	0.00129147	0.00106544	00:00:00	623251	2022-11-10
2020-10-11	1.19134e+07	0			0.4	134068	330479	1.78701e+08	21469.7	1.99085		0	2020-10-11	0.52559		0.65	0.0288215	0.01458	0.00105908	0.00105908	0.497703	0.65	0.47441	1.04886	154600	0.0332354	1.99076	0.984771	0.998007	0.94448	0.00105908	0.00128777	0.00106324	00:00:00	624378	2022-11-10
2020-10-12	1.19345e+07	0			0.4	131977	326074	1.79017e+08	21105.9	1.99102		0	2020-10-12	0.526522		0.65	0.0282604	0.0143856	0.0010569	0.0010569	0.497744	0.65	0.473478	1.04886	154900	0.0331689	1.99093	0.984771	0.998037	0.942704	0.0010569	0.00128409	0.00106104	00:00:00	625486	2022-11-10
2020-10-13	1.19552e+07	0			0.4	129849	321554	1.79328e+08	20737.4	1.99116		0	2020-10-13	0.527436		0.65	0.0276954	0.0141862	0.00105473	0.00105473	0.49778	0.65	0.472564	1.04886	155200	0.0331026	1.99109	0.984771	0.998068	0.940949	0.00105473	0.00128042	0.00105885	00:00:00	626575	2022-11-10
2020-10-14	1.19756e+07	0			0.4	127687	316924	1.79634e+08	20364.8	1.99128		0	2020-10-14	0.528335		0.65	0.0271273	0.0139819	0.00105257	0.00105257	0.497811	0.65	0.471665	1.04886	155500	0.0330363	1.99122	0.984771	0.998099	0.939218	0.00105257	0.00127676	0.00105667	00:00:00	627644	2022-11-10
2020-10-15	1.19956e+07	0			0.4	125494	312193	1.79934e+08	19988.7	1.99139		0	2020-10-15	0.529217		0.65	0.026557	0.0137732	0.00105041	0.00105041	0.497838	0.65	0.470783	1.04886	155800	0.0329703	1.99134	0.984771	0.99813	0.937513	0.00105041	0.00127312	0.00105449	00:00:00	628693	2022-11-10
2020-10-16	1.20152e+07	0			0.4	123276	307368	1.80228e+08	19609.7	1.99148		0	2020-10-16	0.530082		0.65	0.0259854	0.0135604	0.00104826	0.00104826	0.497862	0.65	0.469918	1.04886	156100	0.0329043	1.99144	0.984771	0.998162	0.935834	0.00104826	0.00126949	0.00105232	00:00:00	629723	2022-11-10
2020-10-17	1.20344e+07	0			0.4	121035	302457	1.80516e+08	19228.4	1.99156		0	2020-10-17	0.53093		0.65	0.0254131	0.0133437	0.00104611	0.00104611	0.497882	0.65	0.46907	1.04886	156400	0.0328385	1.99152	0.984771	0.998195	0.934182	0.00104611	0.00126587	0.00105015	00:00:00	630732	2022-11-10
2020-10-18	1.20533e+07	0			0.4	118774	297469	1.80799e+08	18845.4	1.99163		0	2020-10-18	0.531762		0.65	0.0248409	0.0131236	0.00104397	0.00104397	0.4979	0.65	0.468238	1.04886	156700	0.0327729	1.9916	0.984771	0.998228	0.93256	0.00104397	0.00126227	0.00104799	00:00:00	631721	2022-11-10
2020-10-19	1.20717e+07	0			0.4	116498	292410	1.81076e+08	18461.3	1.99169		0	2020-10-19	0.532576		0.65	0.0242697	0.0129004	0.00104184	0.00104184	0.497915	0.65	0.467424	1.04886	157000	0.0327073	1.99166	0.984771	0.998261	0.930966	0.00104184	0.00125868	0.00104583	00:00:00	632691	2022-11-10
2020-10-20	1.20898e+07	0			0.4	114210	287289	1.81347e+08	18076.5	1.99175		0	2020-10-20	0.533374		0.65	0.0237001	0.0126745	0.00103971	0.00103971	0.497928	0.65	0.466626	1.04886	157300	0.0326419	1.99172	0.984771	0.998294	0.929402	0.00103971	0.0012551	0.00104368	00:00:00	633640	2022-11-10
2020-10-21	1.21075e+07	0			0.4	111913	282115	1.81612e+08	17691.6	1.99179		0	2020-10-21	0.534154		0.65	0.0231329	0.0124462	0.00103759	0.00103759	0.49794	0.65	0.465846	1.04886	157600	0.0325766	1.99177	0.984771	0.998327	0.927869	0.00103759	0.00125153	0.00104154	00:00:00	634569	2022-11-10
2020-10-22	1.21248e+07	0			0.4	109610	276895	1.81872e+08	17307.1	1.99183		0	2020-10-22	0.534918		0.65	0.0225686	0.012216	0.00103547	0.00103547	0.49795	0.65	0.465082	1.04886	157900	0.0325115	1.99181	0.984771	0.998361	0.926367	0.00103547	0.00124798	0.0010394	00:00:00	635477	2022-11-10
2020-10-23	1.21417e+07	0			0.4	107305	271638	1.82126e+08	16923.5	1.99187		0	2020-10-23	0.535664		0.65	0.0220081	0.011984	0.00103336	0.00103336	0.497959	0.65	0.464336	1.04886	158200	0.0324464	1.99185	0.984771	0.998395	0.924896	0.00103336	0.00124444	0.00103727	00:00:00	636366	2022-11-10
2020-10-24	1.21583e+07	0			0.4	105001	266351	1.82374e+08	16541.3	1.9919		0	2020-10-24	0.536394		0.65	0.0214517	0.0117508	0.00103125	0.00103125	0.497967	0.65	0.463606	1.04886	158500	0.0323815	1.99188	0.984771	0.998428	0.923457	0.00103125	0.00124091	0.00103514	00:00:00	637234	2022-11-10
2020-10-25	1.21744e+07	0			0.4	102701	261042	1.82616e+08	16160.9	1.99193		0	2020-10-25	0.537107		0.65	0.0209002	0.0115166	0.00102915	0.00102915	0.497973	0.65	0.462893	1.04886	158800	0.0323168	1.99191	0.984771	0.998462	0.922049	0.00102915	0.0012374	0.00103302	00:00:00	638083	2022-11-10
2020-10-26	1.21902e+07	0			0.4	100407	255719	1.82853e+08	15782.7	1.99195		0	2020-10-26	0.537803		0.65	0.0203541	0.0112817	0.00102705	0.00102705	0.497979	0.65	0.462197	1.04886	159100	0.0322521	1.99194	0.984771	0.998496	0.920672	0.00102705	0.0012339	0.0010309	00:00:00	638911	2022-11-10
2020-10-27	1.22056e+07	0			0.4	98122.7	250389	1.83084e+08	15407.2	1.99197		0	2020-10-27	0.538483		0.65	0.0198139	0.0110466	0.00102496	0.00102496	0.497984	0.65	0.461517	1.04886	159400	0.0321876	1.99196	0.984771	0.998529	0.919327	0.00102496	0.00123041	0.00102879	00:00:00	639720	2022-11-10
2020-10-28	1.22206e+07	0			0.4	95850.2	245059	1.8331e+08	15034.6	1.99199		0	2020-10-28	0.539146		0.65	0.01928	0.0108114	0.00102288	0.00102288	0.497988	0.65	0.460854	1.04886	159700	0.0321233	1.99198	0.984771	0.998563	0.918014	0.00102288	0.00122693	0.00102669	00:00:00	640509	2022-11-10
2020-10-29	1.22353e+07	0			0.4	93592.1	239735	1.8353e+08	14665.4	1.992		0	2020-10-29	0.539793		0.65	0.0187529	0.0105766	0.0010208	0.0010208	0.497992	0.65	0.460207	1.04886	160000	0.032059	1.99199	0.984771	0.998596	0.916732	0.0010208	0.00122347	0.00102459	00:00:00	641279	2022-11-10
2020-10-30	1.22496e+07	0			0.4	91350.7	234426	1.83744e+08	14299.9	1.99201		0	2020-10-30	0.540424		0.65	0.018233	0.0103423	0.00101873	0.00101873	0.497995	0.65	0.459576	1.04886	160300	0.0319949	1.99201	0.984771	0.998629	0.915481	0.00101873	0.00122001	0.0010225	00:00:00	642030	2022-11-10
2020-10-31	1.22636e+07	0			0.4	89128.2	229136	1.83953e+08	13938.4	1.99202		0	2020-10-31	0.541039		0.65	0.0177207	0.0101089	0.00101666	0.00101666	0.497998	0.65	0.458961	1.04886	160600	0.0319309	1.99202	0.984771	0.998662	0.914262	0.00101666	0.00121657	0.00102041	00:00:00	642762	2022-11-10
2020-11-01	1.22771e+07	0			0.4	86926.6	223871	1.84157e+08	13581.1	1.99203		0	2020-11-01	0.541638		0.65	0.0172162	0.00987668	0.0010146	0.0010146	0.498001	0.65	0.458362	1.04886	160900	0.031867	1.99203	0.984771	0.998695	0.913073	0.0010146	0.00121314	0.00101833	00:00:00	643475	2022-11-10
2020-11-02	1.22904e+07	0			0.4	84747.9	218639	1.84355e+08	13228.4	1.99204		0	2020-11-02	0.542222		0.65	0.01672	0.00964582	0.00101254	0.00101254	0.498003	0.65	0.457778	1.04886	161200	0.0318033	1.99204	0.984771	0.998727	0.911914	0.00101254	0.00120973	0.00101625	00:00:00	644169	2022-11-10
2020-11-03	1.23032e+07	0			0.4	82593.8	213443	1.84549e+08	12880.5	1.99205		0	2020-11-03	0.54279		0.65	0.0162322	0.00941659	0.00101049	0.00101049	0.498005	0.65	0.45721	1.04886	161500	0.0317397	1.99205	0.984771	0.998759	0.910785	0.00101049	0.00120632	0.00101418	00:00:00	644845	2022-11-10
2020-11-04	1.23158e+07	0			0.4	80465.9	208289	1.84737e+08	12537.6	1.99206		0	2020-11-04	0.543343		0.65	0.0157531	0.0091892	0.00100844	0.00100844	0.498006	0.65	0.456657	1.04886	161800	0.0316762	1.99205	0.984771	0.99879	0.909686	0.00100844	0.00120293	0.00101212	00:00:00	645504	2022-11-10
2020-11-05	1.2328e+07	0			0.4	78365.9	203181	1.8492e+08	12199.8	1.99206		0	2020-11-05	0.543881		0.65	0.015283	0.00896388	0.0010064	0.0010064	0.498008	0.65	0.456119	1.04886	162100	0.0316129	1.99206	0.984771	0.998821	0.908617	0.0010064	0.00119955	0.00101006	00:00:00	646144	2022-11-10
2020-11-06	1.23398e+07	0			0.4	76294.9	198125	1.85098e+08	11867.5	1.99207		0	2020-11-06	0.544405		0.65	0.0148219	0.00874082	0.00100437	0.00100437	0.498009	0.65	0.455595	1.04886	162400	0.0315496	1.99207	0.984771	0.998852	0.907576	0.00100437	0.00119618	0.001008	00:00:00	646767	2022-11-10
2020-11-07	1.23514e+07	0			0.4	74254.4	193125	1.85271e+08	11540.6	1.99207		0	2020-11-07	0.544914		0.65	0.0143701	0.0085202	0.00100234	0.00100234	0.49801	0.65	0.455086	1.04886	162700	0.0314865	1.99207	0.984771	0.998882	0.906564	0.00100234	0.00119282	0.00100595	00:00:00	647373	2022-11-10
2020-11-08	1.23626e+07	0			0.4	72245.4	188183	1.85439e+08	11219.4	1.99208		0	2020-11-08	0.545409		0.65	0.0139277	0.0083022	0.00100031	0.00100031	0.498011	0.65	0.454591	1.04886	163000	0.0314236	1.99207	0.984771	0.998912	0.905579	0.00100031	0.00118948	0.00100391	00:00:00	647962	2022-11-10
2020-11-09	1.23735e+07	0			0.4	70268.9	183304	1.85603e+08	10904	1.99208		0	2020-11-09	0.54589		0.65	0.0134947	0.00808696	0.000998294	0.000998294	0.498012	0.65	0.45411	1.04886	163300	0.0313607	1.99208	0.984771	0.998942	0.904622	0.000998294	0.00118614	0.00100187	00:00:00	648535	2022-11-10
2020-11-10	1.23841e+07	0			0.4	68325.8	178492	1.85762e+08	10594.5	1.99208		0	2020-11-10	0.546358		0.65	0.0130713	0.00787464	0.00099628	0.00099628	0.498013	0.65	0.453642	1.04886	163600	0.031298	1.99208	0.984771	0.998971	0.903693	0.00099628	0.00118282	0.000999837	00:00:00	649091	2022-11-10
2020-11-11	1.23944e+07	0			0.4	66416.9	173748	1.85916e+08	10290.9	1.99208		0	2020-11-11	0.546812		0.65	0.0126575	0.00766536	0.000994271	0.000994271	0.498013	0.65	0.453188	1.04886	163900	0.0312354	1.99208	0.984771	0.998999	0.902789	0.000994271	0.00117951	0.000997809	00:00:00	649631	2022-11-10
2020-11-12	1.24044e+07	0			0.4	64542.9	169076	1.86066e+08	9993.42	1.99209		0	2020-11-12	0.547252		0.65	0.0122533	0.00745924	0.000992267	0.000992267	0.498014	0.65	0.452748	1.04886	164200	0.0311729	1.99208	0.984771	0.999027	0.901912	0.000992267	0.00117621	0.000995787	00:00:00	650156	2022-11-10
2020-11-13	1.24141e+07	0			0.4	62704.3	164478	1.86211e+08	9702	1.99209		0	2020-11-13	0.547681		0.65	0.0118588	0.00725639	0.000990269	0.000990269	0.498014	0.65	0.452319	1.04886	164500	0.0311106	1.99209	0.984771	0.999055	0.90106	0.000990269	0.00117292	0.00099377	00:00:00	650665	2022-11-10
2020-11-14	1.24235e+07	0			0.4	60901.6	159957	1.86353e+08	9416.72	1.99209		0	2020-11-14	0.548096		0.65	0.0114739	0.00705691	0.000988276	0.000988276	0.498015	0.65	0.451904	1.04886	164800	0.0310484	1.99209	0.984771	0.999082	0.900233	0.000988276	0.00116965	0.000991758	00:00:00	651159	2022-11-10
2020-11-15	1.24326e+07	0			0.4	59135.2	155513	1.8649e+08	9137.61	1.99209		0	2020-11-15	0.548499		0.65	0.0110986	0.00686087	0.000986287	0.000986287	0.498015	0.65	0.451501	1.04886	165100	0.0309863	1.99209	0.984771	0.999108	0.899431	0.000986287	0.00116638	0.000989751	00:00:00	651639	2022-11-10
2020-11-16	1.24415e+07	0			0.4	57405.4	151149	1.86623e+08	8864.67	1.99209		0	2020-11-16	0.54889		0.65	0.0107329	0.00666835	0.000984305	0.000984305	0.498015	0.65	0.45111	1.04886	165400	0.0309243	1.99209	0.984771	0.999134	0.898652	0.000984305	0.00116313	0.00098775	00:00:00	652105	2022-11-10
2020-11-17	1.24501e+07	0			0.4	55712.3	146867	1.86752e+08	8597.91	1.99209		0	2020-11-17	0.54927		0.65	0.0103767	0.00647941	0.000982327	0.000982327	0.498015	0.65	0.45073	1.04886	165700	0.0308625	1.99209	0.984771	0.999159	0.897897	0.000982327	0.00115989	0.000985753	00:00:00	652556	2022-11-10
2020-11-18	1.24584e+07	0			0.4	54056.2	142666	1.86877e+08	8337.33	1.99209		0	2020-11-18	0.549637		0.65	0.01003	0.00629411	0.000980354	0.000980354	0.498016	0.65	0.450363	1.04886	166000	0.0308007	1.99209	0.984771	0.999184	0.897165	0.000980354	0.00115666	0.000983762	00:00:00	652994	2022-11-10
2020-11-19	1.24665e+07	0			0.4	52437.1	138549	1.86998e+08	8082.9	1.99209		0	2020-11-19	0.549994		0.65	0.00969256	0.00611248	0.000978387	0.000978387	0.498016	0.65	0.450006	1.04886	166300	0.0307391	1.99209	0.984771	0.999208	0.896455	0.000978387	0.00115344	0.000981776	00:00:00	653418	2022-11-10
2020-11-20	1.24744e+07	0			0.4	50855	134517	1.87115e+08	7834.59	1.9921		0	2020-11-20	0.55034		0.65	0.00936442	0.00593456	0.000976424	0.000976424	0.498016	0.65	0.44966	1.04886	166600	0.0306776	1.9921	0.984771	0.999232	0.895766	0.000976424	0.00115023	0.000979796	00:00:00	653829	2022-11-10
2020-11-21	1.2482e+07	0			0.4	49309.8	130568	1.87229e+08	7592.37	1.9921		0	2020-11-21	0.550675		0.65	0.00904543	0.00576037	0.000974467	0.000974467	0.498016	0.65	0.449325	1.04886	166900	0.0306163	1.9921	0.984771	0.999255	0.895099	0.000974467	0.00114703	0.00097782	00:00:00	654228	2022-11-10
2020-11-22	1.24893e+07	0			0.4	47801.3	126705	1.8734e+08	7356.19	1.9921		0	2020-11-22	0.550999		0.65	0.00873548	0.00558993	0.000972514	0.000972514	0.498016	0.65	0.449001	1.04886	167200	0.0305551	1.9921	0.984771	0.999278	0.894453	0.000972514	0.00114385	0.00097585	00:00:00	654614	2022-11-10
2020-11-23	1.24964e+07	0			0.4	46329.4	122927	1.87447e+08	7126	1.9921		0	2020-11-23	0.551313		0.65	0.00843442	0.00542326	0.000970567	0.000970567	0.498016	0.65	0.448687	1.04886	167500	0.030494	1.9921	0.984771	0.9993	0.893827	0.000970567	0.00114067	0.000973884	00:00:00	654988	2022-11-10
2020-11-24	1.25033e+07	0			0.4	44893.8	119234	1.8755e+08	6901.74	1.9921		0	2020-11-24	0.551618		0.65	0.00814214	0.00526034	0.000968625	0.000968625	0.498016	0.65	0.448382	1.04886	167800	0.030433	1.9921	0.984771	0.999321	0.893221	0.000968625	0.0011375	0.000971924	00:00:00	655351	2022-11-10
2020-11-25	1.251e+07	0			0.4	43494.2	115627	1.8765e+08	6683.35	1.9921		0	2020-11-25	0.551913		0.65	0.00785849	0.00510118	0.000966687	0.000966687	0.498017	0.65	0.448087	1.04886	168100	0.0303721	1.9921	0.984771	0.999342	0.892633	0.000966687	0.00113435	0.000969969	00:00:00	655701	2022-11-10
2020-11-26	1.25165e+07	0			0.4	42130.4	112104	1.87747e+08	6470.74	1.9921		0	2020-11-26	0.552198		0.65	0.00758331	0.00494577	0.000964755	0.000964755	0.498017	0.65	0.447802	1.04886	168400	0.0303114	1.9921	0.984771	0.999363	0.892065	0.000964755	0.00113121	0.000968019	00:00:00	656041	2022-11-10
2020-11-27	1.25228e+07	0			0.4	40801.9	108666	1.87841e+08	6263.84	1.9921		0	2020-11-27	0.552475		0.65	0.00731646	0.00479409	0.000962828	0.000962828	0.498017	0.65	0.447525	1.04886	168700	0.0302507	1.9921	0.984771	0.999383	0.891515	0.000962828	0.00112808	0.000966074	00:00:00	656370	2022-11-10
2020-11-28	1.25288e+07	0			0.4	39508.3	105312	1.87932e+08	6062.58	1.9921		0	2020-11-28	0.552742		0.65	0.00705777	0.00464611	0.000960905	0.000960905	0.498017	0.65	0.447258	1.04886	169000	0.0301902	1.9921	0.984771	0.999402	0.890982	0.000960905	0.00112495	0.000964134	00:00:00	656688	2022-11-10
2020-11-29	1.25347e+07	0			0.4	38249.1	102041	1.8802e+08	5866.86	1.9921		0	2020-11-29	0.553001		0.65	0.00680709	0.00450181	0.000958988	0.000958988	0.498017	0.65	0.446999	1.04886	169300	0.0301298	1.9921	0.984771	0.999421	0.890466	0.000958988	0.00112184	0.000962199	00:00:00	656996	2022-11-10
2020-11-30	1.25404e+07	0			0.4	37024	98853	1.88105e+08	5676.59	1.9921		0	2020-11-30	0.553251		0.65	0.00656424	0.00436116	0.000957075	0.000957075	0.498017	0.65	0.446749	1.04886	169600	0.0300696	1.9921	0.984771	0.99944	0.889967	0.000957075	0.00111874	0.000960268	00:00:00	657294	2022-11-10
2020-12-01	1.25459e+07	0			0.4	35832.3	95746.8	1.88188e+08	5491.69	1.9921		0	2020-12-01	0.553494		0.65	0.00632906	0.00422412	0.000955167	0.000955167	0.498017	0.65	0.446506	1.04886	169900	0.0300094	1.9921	0.984771	0.999458	0.889485	0.000955167	0.00111565	0.000958343	00:00:00	657583	2022-11-10
2020-12-02	1.25512e+07	0			0.4	34673.6	92721.5	1.88268e+08	5312.05	1.9921		0	2020-12-02	0.553728		0.65	0.00610138	0.00409065	0.000953264	0.000953264	0.498017	0.65	0.446272	1.04886	170200	0.0299494	1.9921	0.984771	0.999475	0.889018	0.000953264	0.00111257	0.000956423	00:00:00	657862	2022-11-10
2020-12-03	1.25563e+07	0			0.4	33547.3	89776.2	1.88345e+08	5137.58	1.9921		0	2020-12-03	0.553955		0.65	0.00588102	0.00396071	0.000951366	0.000951366	0.498017	0.65	0.446045	1.04886	170500	0.0298895	1.9921	0.984771	0.999492	0.888567	0.000951366	0.0011095	0.000954508	00:00:00	658131	2022-11-10
2020-12-04	1.25613e+07	0			0.4	32452.9	86909.7	1.88419e+08	4968.17	1.9921		0	2020-12-04	0.554174		0.65	0.00566782	0.00383425	0.000949473	0.000949473	0.498017	0.65	0.445826	1.04886	170800	0.0298298	1.9921	0.984771	0.999509	0.88813	0.000949473	0.00110645	0.000952597	00:00:00	658392	2022-11-10
2020-12-05	1.25661e+07	0			0.4	31389.8	84121.1	1.88491e+08	4803.74	1.9921		0	2020-12-05	0.554386		0.65	0.00546159	0.00371123	0.000947585	0.000947585	0.498017	0.65	0.445614	1.04886	171100	0.0297701	1.9921	0.984771	0.999525	0.887708	0.000947585	0.0011034	0.000950692	00:00:00	658644	2022-11-10
2020-12-06	1.25707e+07	0			0.4	30357.4	81409.1	1.88561e+08	4644.16	1.9921		0	2020-12-06	0.554591		0.65	0.00526216	0.00359158	0.000945701	0.000945701	0.498017	0.65	0.445409	1.04886	171400	0.0297106	1.9921	0.984771	0.99954	0.8873	0.000945701	0.00110036	0.000948791	00:00:00	658888	2022-11-10
2020-12-07	1.25752e+07	0			0.4	29355	78772.4	1.88628e+08	4489.35	1.9921		0	2020-12-07	0.554789		0.65	0.00506937	0.00347525	0.000943823	0.000943823	0.498017	0.65	0.445211	1.04886	171700	0.0296511	1.9921	0.984771	0.999555	0.886905	0.000943823	0.00109733	0.000946896	00:00:00	659124	2022-11-10
2020-12-08	1.25795e+07	0			0.4	28382.2	76209.9	1.88693e+08	4339.19	1.9921		0	2020-12-08	0.55498		0.65	0.00488303	0.0033622	0.000941949	0.000941949	0.498017	0.65	0.44502	1.04886	172000	0.0295918	1.9921	0.984771	0.99957	0.886524	0.000941949	0.00109431	0.000945005	00:00:00	659352	2022-11-10
2020-12-09	1.25837e+07	0			0.4	27438.2	73720.1	1.88756e+08	4193.58	1.9921		0	2020-12-09	0.555165		0.65	0.00470297	0.00325236	0.000940079	0.000940079	0.498017	0.65	0.444835	1.04886	172300	0.0295326	1.9921	0.984771	0.999584	0.886155	0.000940079	0.00109131	0.000943119	00:00:00	659572	2022-11-10
2020-12-10	1.25878e+07	0			0.4	26522.4	71301.8	1.88817e+08	4052.42	1.9921		0	2020-12-10	0.555344		0.65	0.00452903	0.00314567	0.000938215	0.000938215	0.498017	0.65	0.444656	1.04886	172600	0.0294736	1.9921	0.984771	0.999598	0.885799	0.000938215	0.00108831	0.000941237	00:00:00	659785	2022-11-10
2020-12-11	1.25917e+07	0			0.4	25634.3	68953.5	1.88876e+08	3915.59	1.9921		0	2020-12-11	0.555517		0.65	0.00436104	0.00304207	0.000936355	0.000936355	0.498017	0.65	0.444483	1.04886	172900	0.0294146	1.9921	0.984771	0.999612	0.885455	0.000936355	0.00108532	0.000939361	00:00:00	659990	2022-11-10
2020-12-12	1.25955e+07	0			0.4	24773.1	66674	1.88932e+08	3783	1.9921		0	2020-12-12	0.555684		0.65	0.00419882	0.0029415	0.0009345	0.0009345	0.498017	0.65	0.444316	1.04886	173200	0.0293558	1.9921	0.984771	0.999625	0.885123	0.0009345	0.00108235	0.000937489	00:00:00	660189	2022-11-10
2020-12-13	1.25991e+07	0			0.4	23938.3	64461.6	1.88987e+08	3654.54	1.9921		0	2020-12-13	0.555845		0.65	0.00404221	0.0028439	0.00093265	0.00093265	0.498017	0.65	0.444155	1.04886	173500	0.0292971	1.9921	0.984771	0.999637	0.884801	0.00093265	0.00107938	0.000935622	00:00:00	660381	2022-11-10
2020-12-14	1.26027e+07	0			0.4	23129.2	62315.2	1.8904e+08	3530.11	1.9921		0	2020-12-14	0.556001		0.65	0.00389105	0.0027492	0.000930804	0.000930804	0.498017	0.65	0.443999	1.04886	173800	0.0292385	1.9921	0.984771	0.999649	0.884491	0.000930804	0.00107642	0.00093376	00:00:00	660566	2022-11-10
2020-12-15	1.26061e+07	0			0.4	22345.3	60233.1	1.89091e+08	3409.6	1.9921		0	2020-12-15	0.556151		0.65	0.00374518	0.00265734	0.000928963	0.000928963	0.498017	0.65	0.443849	1.04886	174100	0.02918	1.9921	0.984771	0.999661	0.884192	0.000928963	0.00107348	0.000931902	00:00:00	660745	2022-11-10
2020-12-16	1.26094e+07	0			0.4	21585.8	58214	1.89141e+08	3292.92	1.9921		0	2020-12-16	0.556296		0.65	0.00360444	0.00256826	0.000927127	0.000927127	0.498017	0.65	0.443704	1.04886	174400	0.0291217	1.9921	0.984771	0.999673	0.883902	0.000927127	0.00107054	0.00093005	00:00:00	660918	2022-11-10
2020-12-17	1.26126e+07	0			0.4	20850.1	56256.3	1.89188e+08	3179.95	1.9921		0	2020-12-17	0.556437		0.65	0.00346867	0.0024819	0.000925295	0.000925295	0.498017	0.65	0.443563	1.04886	174700	0.0290634	1.9921	0.984771	0.999684	0.883623	0.000925295	0.00106761	0.000928201	00:00:00	661085	2022-11-10
2020-12-18	1.26156e+07	0			0.4	20137.7	54358.8	1.89234e+08	3070.61	1.9921		0	2020-12-18	0.556572		0.65	0.00333772	0.00239818	0.000923468	0.000923468	0.498017	0.65	0.443428	1.04886	175000	0.0290053	1.9921	0.984771	0.999695	0.883353	0.000923468	0.00106469	0.000926358	00:00:00	661246	2022-11-10
2020-12-19	1.26186e+07	0			0.4	19448	52519.8	1.89279e+08	2964.79	1.9921		0	2020-12-19	0.556703		0.65	0.00321144	0.00231705	0.000921645	0.000921645	0.498017	0.65	0.443297	1.04886	175300	0.0289473	1.9921	0.984771	0.999705	0.883092	0.000921645	0.00106179	0.000924519	00:00:00	661402	2022-11-10
2020-12-20	1.26215e+07	0			0.4	18780.3	50738	1.89322e+08	2862.39	1.9921		0	2020-12-20	0.556829		0.65	0.00308969	0.00223844	0.000919827	0.000919827	0.498017	0.65	0.443171	1.04886	175600	0.0288894	1.9921	0.984771	0.999715	0.882841	0.000919827	0.00105889	0.000922685	00:00:00	661552	2022-11-10
2020-12-21	1.26242e+07	0			0.4	18134	49012	1.89363e+08	2763.33	1.9921		0	2020-12-21	0.556951		0.65	0.00297232	0.0021623	0.000918014	0.000918014	0.498017	0.65	0.443049	1.04886	175900	0.0288316	1.9921	0.984771	0.999725	0.882598	0.000918014	0.001056	0.000920856	00:00:00	661697	2022-11-10
2020-12-22	1.26269e+07	0			0.4	17508.6	47340.3	1.89403e+08	2667.5	1.9921		0	2020-12-22	0.557069		0.65	0.0028592	0.00208854	0.000916205	0.000916205	0.498017	0.65	0.442931	1.04886	176200	0.0287739	1.9921	0.984771	0.999734	0.882363	0.000916205	0.00105312	0.000919031	00:00:00	661837	2022-11-10
2020-12-23	1.26295e+07	0			0.4	16903.4	45721.6	1.89442e+08	2574.82	1.9921		0	2020-12-23	0.557182		0.65	0.00275018	0.00201713	0.000914401	0.000914401	0.498017	0.65	0.442818	1.04886	176500	0.0287164	1.9921	0.984771	0.999744	0.882137	0.000914401	0.00105025	0.000917211	00:00:00	661972	2022-11-10
2020-12-24	1.2632e+07	0			0.4	16318	44154.4	1.89479e+08	2485.19	1.9921		0	2020-12-24	0.557292		0.65	0.00264512	0.00194799	0.000912601	0.000912601	0.498017	0.65	0.442708	1.04886	176800	0.028659	1.9921	0.984771	0.999752	0.881919	0.000912601	0.00104739	0.000915395	00:00:00	662103	2022-11-10
2020-12-25	1.26343e+07	0			0.4	15751.8	42637.3	1.89515e+08	2398.53	1.9921		0	2020-12-25	0.557398		0.65	0.00254391	0.00188106	0.000910806	0.000910806	0.498017	0.65	0.442602	1.04886	177100	0.0286016	1.9921	0.984771	0.999761	0.881708	0.000910806	0.00104454	0.000913584	00:00:00	662229	2022-11-10
2020-12-26	1.26367e+07	0			0.4	15204.1	41169	1.8955e+08	2314.74	1.9921		0	2020-12-26	0.5575		0.65	0.00244641	0.00181628	0.000909015	0.000909015	0.498017	0.65	0.4425	1.04886	177400	0.0285444	1.9921	0.984771	0.999769	0.881504	0.000909015	0.0010417	0.000911777	00:00:00	662350	2022-11-10
2020-12-27	1.26389e+07	0			0.4	14674.5	39748.2	1.89583e+08	2233.75	1.9921		0	2020-12-27	0.557598		0.65	0.0023525	0.0017536	0.000907229	0.000907229	0.498017	0.65	0.442402	1.04886	177700	0.0284874	1.9921	0.984771	0.999777	0.881308	0.000907229	0.00103887	0.000909975	00:00:00	662467	2022-11-10
2020-12-28	1.26411e+07	0			0.4	14162.5	38373.6	1.89616e+08	2155.46	1.9921		0	2020-12-28	0.557694		0.65	0.00226205	0.00169295	0.000905447	0.000905447	0.498017	0.65	0.442306	1.04886	178000	0.0284304	1.9921	0.984771	0.999785	0.881119	0.000905447	0.00103605	0.000908178	00:00:00	662581	2022-11-10
2020-12-29	1.26431e+07	0			0.4	13667.5	37043.8	1.89647e+08	2079.81	1.9921		0	2020-12-29	0.557785		0.65	0.00217496	0.00163428	0.000903669	0.000903669	0.498017	0.65	0.442215	1.04886	178300	0.0283735	1.9921	0.984771	0.999793	0.880936	0.000903669	0.00103324	0.000906384	00:00:00	662690	2022-11-10
2020-12-30	1.26451e+07	0			0.4	13189	35757.6	1.89677e+08	2006.7	1.9921		0	2020-12-30	0.557874		0.65	0.0020911	0.00157754	0.000901896	0.000901896	0.498017	0.65	0.442126	1.04886	178600	0.0283168	1.9921	0.984771	0.9998	0.88076	0.000901896	0.00103043	0.000904596	00:00:00	662795	2022-11-10
2020-12-31	1.26471e+07	0			0.4	12726.5	34513.7	1.89706e+08	1936.05	1.9921		0	2020-12-31	0.557959		0.65	0.00201036	0.00152266	0.000900128	0.000900128	0.498017	0.65	0.442041	1.04886	178900	0.0282601	1.9921	0.984771	0.999807	0.880589	0.000900128	0.00102764	0.000902812	00:00:00	662897	2022-11-10
2021-01-01	1.26491e+07	0			0.4	12398.6	33429.9	1.89736e+08	1986.86	2.11907		0	2021-01-01	0.558047		1	0.00195137	0.00147485	0.000898364	0.000898364	0.528096	1	0.441953	1.04886	179200	0.0282036	2.05559	0.984771	0.999802	0.936532	0.000898364	0.00102485	0.000901032	00:00:00	663001	2022-11-10
2021-01-02	1.2651e+07	0			0.4	12129.2	32429.4	1.89765e+08	1964.28	2.15082		0	2021-01-02	0.558134		1	0.00190196	0.00143071	0.000896604	0.000896604	0.535061	1	0.441866	1.04886	179500	0.0281472	2.13495	0.984771	0.999804	0.950375	0.000896604	0.00102208	0.000899257	00:00:00	663104	2022-11-10
2021-01-03	1.2653e+07	0			0.4	11930.3	31523.7	1.89795e+08	1956.65	2.1905		0	2021-01-03	0.55822		1	0.00186393	0.00139075	0.000894848	0.000894848	0.543483	1	0.44178	1.04886	179800	0.0280909	2.17066	0.984771	0.999805	0.967719	0.000894848	0.00101931	0.000897486	00:00:00	663207	2022-11-10
2021-01-04	1.2655e+07	0			0.4	11818.3	30728.1	1.89824e+08	1967.77	2.2401		0	2021-01-04	0.558307		1	0.00183966	0.00135565	0.000893097	0.000893097	0.553591	1	0.441693	1.04886	180100	0.0280347	2.2153	0.984771	0.999803	0.989436	0.000893097	0.00101655	0.00089572	00:00:00	663310	2022-11-10
2021-01-05	1.26569e+07	0			0.4	11786.8	30035.8	1.89854e+08	1975.23	2.27035		0	2021-01-05	0.558394		1	0.00182805	0.00132511	0.00089135	0.00089135	0.55954	1	0.441606	1.04886	180400	0.0279787	2.25523	0.984771	0.999803	1.0026	0.00089135	0.00101381	0.000893958	00:00:00	663414	2022-11-10
2021-01-06	1.26589e+07	0			0.4	11846.3	29456.5	1.89884e+08	1995.51	2.30024		0	2021-01-06	0.558482		1	0.00183055	0.00129955	0.000889608	0.000889608	0.565262	1	0.441518	1.04886	180700	0.0279227	2.2853	0.984771	0.999801	1.0156	0.000889608	0.00101107	0.0008922	00:00:00	663519	2022-11-10
2021-01-07	1.2661e+07	0			0.4	11888.5	29000.4	1.89914e+08	2029.09	2.32767		0	2021-01-07	0.558571		1	0.00183037	0.00127943	0.00088787	0.00088787	0.570386	1	0.441429	1.04886	181000	0.0278669	2.31395	0.984771	0.999797	1.0275	0.00088787	0.00100834	0.000890447	00:00:00	663625	2022-11-10
2021-01-08	1.2663e+07	0			0.4	11979.3	28657	1.89945e+08	2055.06	2.34957		0	2021-01-08	0.558662		1	0.00183761	0.00126428	0.000886136	0.000886136	0.574389	1	0.441338	1.04886	181300	0.0278111	2.33862	0.984771	0.999795	1.03695	0.000886136	0.00100561	0.000888698	00:00:00	663733	2022-11-10
2021-01-09	1.26651e+07	0			0.4	12110.5	28430	1.89976e+08	2087.78	2.36937		0	2021-01-09	0.558754		1	0.00185095	0.00125427	0.000884406	0.000884406	0.577947	1	0.441246	1.04886	181600	0.0277555	2.35947	0.984771	0.999791	1.04547	0.000884406	0.0010029	0.000886954	00:00:00	663843	2022-11-10
2021-01-10	1.26672e+07	0			0.4	12268.3	28321.9	1.90008e+08	2125.59	2.38665		0	2021-01-10	0.558848		1	0.00186823	0.00124949	0.000882681	0.000882681	0.581003	1	0.441152	1.04886	181900	0.0277	2.37801	0.984771	0.999787	1.05288	0.000882681	0.0010002	0.000885214	00:00:00	663954	2022-11-10
2021-01-11	1.26694e+07	0			0.4	12459.2	28332.5	1.90041e+08	2166.13	2.4014		0	2021-01-11	0.558943		1	0.00189039	0.00124996	0.00088096	0.00088096	0.583576	1	0.441057	1.04886	182200	0.0276446	2.39402	0.984771	0.999783	1.05915	0.00088096	0.000997503	0.000883478	00:00:00	664068	2022-11-10
2021-01-12	1.26716e+07	0			0.4	12674.9	28463.9	1.90074e+08	2211.23	2.41435		0	2021-01-12	0.559041		1	0.00191612	0.00125576	0.000879243	0.000879243	0.585811	1	0.440959	1.04886	182500	0.0275893	2.40788	0.984771	0.999779	1.06463	0.000879243	0.000994817	0.000881746	00:00:00	664184	2022-11-10
2021-01-13	1.26739e+07	0			0.4	12905.3	28716.7	1.90108e+08	2259.49	2.4256		0	2021-01-13	0.559141		1	0.00194385	0.00126691	0.000877531	0.000877531	0.587731	1	0.440859	1.04886	182800	0.0275341	2.41998	0.984771	0.999774	1.06935	0.000877531	0.000992139	0.000880019	00:00:00	664303	2022-11-10
2021-01-14	1.26762e+07	0			0.4	13159.5	29089.9	1.90142e+08	2309.27	2.43534		0	2021-01-14	0.559243		1	0.00197493	0.00128338	0.000875822	0.000875822	0.589379	1	0.440757	1.04886	183100	0.0274791	2.43047	0.984771	0.999769	1.07339	0.000875822	0.00098947	0.000878296	00:00:00	664424	2022-11-10
2021-01-15	1.26785e+07	0			0.4	13434.1	29465.5	1.90178e+08	2362.42	2.44382		0	2021-01-15	0.559347		1	0.00200883	0.00129995	0.000874118	0.000874118	0.590805	1	0.440653	1.04886	183400	0.0274241	2.43958	0.984771	0.999764	1.07688	0.000874118	0.00098681	0.000876577	00:00:00	664548	2022-11-10
2021-01-16	1.26809e+07	0			0.4	13727	29919.7	1.90214e+08	2418.42	2.45119		0	2021-01-16	0.559454		1	0.00204516	0.00131998	0.000872418	0.000872418	0.592035	1	0.440546	1.04886	183700	0.0273693	2.44751	0.984771	0.999758	1.07986	0.000872418	0.000984159	0.000874863	00:00:00	664675	2022-11-10
2021-01-17	1.26834e+07	0			0.4	14037.8	30440	1.90251e+08	2476.99	2.45759		0	2021-01-17	0.559563		1	0.00208389	0.00134294	0.000870722	0.000870722	0.593097	1	0.440437	1.04886	184000	0.0273145	2.45439	0.984771	0.999752	1.08241	0.000870722	0.000981516	0.000873152	00:00:00	664805	2022-11-10
2021-01-18	1.2686e+07	0			0.4	14364.8	31010.4	1.90289e+08	2538.19	2.46315		0	2021-01-18	0.559675		1	0.0021247	0.00136811	0.00086903	0.00086903	0.594016	1	0.440325	1.04886	184300	0.0272599	2.46037	0.984771	0.999746	1.08459	0.00086903	0.000978882	0.000871446	00:00:00	664938	2022-11-10
2021-01-19	1.26886e+07	0			0.4	14707	31636.9	1.90328e+08	2601.74	2.46798		0	2021-01-19	0.55979		1	0.00216744	0.00139575	0.000867343	0.000867343	0.594811	1	0.44021	1.04886	184600	0.0272054	2.46557	0.984771	0.999739	1.08643	0.000867343	0.000976256	0.000869744	00:00:00	665075	2022-11-10
2021-01-20	1.26912e+07	0			0.4	15065.3	32309	1.90368e+08	2667.56	2.47218		0	2021-01-20	0.559907		1	0.00221221	0.00142539	0.00086566	0.00086566	0.595499	1	0.440093	1.04886	184900	0.027151	2.47008	0.984771	0.999733	1.08799	0.00086566	0.000973639	0.000868047	00:00:00	665215	2022-11-10
2021-01-21	1.2694e+07	0			0.4	15438.7	33015.7	1.90409e+08	2735.85	2.47583		0	2021-01-21	0.560028		1	0.00225884	0.00145658	0.00086398	0.00086398	0.596095	1	0.439972	1.04886	185200	0.0270967	2.474	0.984771	0.999726	1.0893	0.00086398	0.00097103	0.000866353	00:00:00	665358	2022-11-10
2021-01-22	1.26968e+07	0			0.4	15826.8	33767.1	1.90452e+08	2806.48	2.479		0	2021-01-22	0.560152		1	0.00230725	0.00148973	0.000862305	0.000862305	0.596611	1	0.439848	1.04886	185500	0.0270425	2.47741	0.984771	0.999719	1.09038	0.000862305	0.00096843	0.000864664	00:00:00	665506	2022-11-10
2021-01-23	1.26997e+07	0			0.4	16229.2	34558.7	1.90495e+08	2879.41	2.48175		0	2021-01-23	0.560279		1	0.00235737	0.00152465	0.000860634	0.000860634	0.597059	1	0.439721	1.04886	185800	0.0269884	2.48037	0.984771	0.999711	1.09128	0.000860634	0.000965838	0.000862978	00:00:00	665657	2022-11-10
2021-01-24	1.27026e+07	0			0.4	16645.6	35387.8	1.90539e+08	2954.61	2.48414		0	2021-01-24	0.560409		1	0.00240914	0.00156123	0.000858967	0.000858967	0.597447	1	0.439591	1.04886	186100	0.0269344	2.48295	0.984771	0.999704	1.09201	0.000858967	0.000963254	0.000861297	00:00:00	665812	2022-11-10
2021-01-25	1.27056e+07	0			0.4	17076	36253.7	1.90585e+08	3032.06	2.48622		0	2021-01-25	0.560543		1	0.0024625	0.00159943	0.000857304	0.000857304	0.597784	1	0.439457	1.04886	186400	0.0268805	2.48518	0.984771	0.999696	1.09259	0.000857304	0.000960679	0.00085962	00:00:00	665971	2022-11-10
2021-01-26	1.27088e+07	0			0.4	17520.2	37154.2	1.90631e+08	3111.76	2.48803		0	2021-01-26	0.56068		1	0.00251746	0.00163916	0.000855645	0.000855645	0.598076	1	0.43932	1.04886	186700	0.0268268	2.48713	0.984771	0.999688	1.09304	0.000855645	0.000958112	0.000857947	00:00:00	666135	2022-11-10
2021-01-27	1.27119e+07	0			0.4	17978	38088.5	1.90679e+08	3193.72	2.4896		0	2021-01-27	0.560821		1	0.00257395	0.00168037	0.00085399	0.00085399	0.598329	1	0.439179	1.04886	187000	0.0267731	2.48881	0.984771	0.999679	1.09338	0.00085399	0.000955553	0.000856279	00:00:00	666302	2022-11-10
2021-01-28	1.27152e+07	0			0.4	18449.5	39057.1	1.90728e+08	3277.93	2.49096		0	2021-01-28	0.560966		1	0.00263194	0.00172311	0.000852339	0.000852339	0.598549	1	0.439034	1.04886	187300	0.0267196	2.49028	0.984771	0.999671	1.09362	0.000852339	0.000953002	0.000854614	00:00:00	666474	2022-11-10
2021-01-29	1.27186e+07	0			0.4	18934.5	40059.1	1.90779e+08	3364.38	2.49215		0	2021-01-29	0.561114		1	0.00269141	0.00176731	0.000850692	0.000850692	0.59874	1	0.438886	1.04886	187600	0.0266661	2.49156	0.984771	0.999662	1.09377	0.000850692	0.00095046	0.000852953	00:00:00	666651	2022-11-10
2021-01-30	1.2722e+07	0			0.4	19432.9	41093.7	1.90831e+08	3453.08	2.49318		0	2021-01-30	0.561266		1	0.00275234	0.00181296	0.000849049	0.000849049	0.598905	1	0.438734	1.04886	187900	0.0266128	2.49266	0.984771	0.999653	1.09384	0.000849049	0.000947925	0.000851296	00:00:00	666832	2022-11-10
2021-01-31	1.27256e+07	0			0.4	19944.9	42160.8	1.90884e+08	3544.03	2.49407		0	2021-01-31	0.561423		1	0.00281471	0.00186003	0.00084741	0.00084741	0.599049	1	0.438577	1.04886	188200	0.0265596	2.49362	0.984771	0.999644	1.09384	0.00084741	0.000945399	0.000849644	00:00:00	667018	2022-11-10
2021-02-01	1.27292e+07	0			0.4	20470.4	43259.8	1.90938e+08	3637.23	2.49485		0	2021-02-01	0.561583		1	0.0028785	0.00190852	0.000845775	0.000845775	0.599174	1	0.438417	1.04886	188500	0.0265065	2.49446	0.984771	0.999634	1.09378	0.000845775	0.000942881	0.000847995	00:00:00	667209	2022-11-10
2021-02-02	1.2733e+07	0			0.4	21009.4	44390.8	1.90994e+08	3732.7	2.49552		0	2021-02-02	0.561748		1	0.0029437	0.00195842	0.000844144	0.000844144	0.599283	1	0.438252	1.04886	188800	0.0264534	2.49519	0.984771	0.999624	1.09367	0.000844144	0.000940371	0.000846351	00:00:00	667405	2022-11-10
2021-02-03	1.27368e+07	0			0.4	21561.9	45553.7	1.91052e+08	3830.45	2.49611		0	2021-02-03	0.561917		1	0.00301029	0.00200972	0.000842517	0.000842517	0.599377	1	0.438083	1.04886	189100	0.0264005	2.49582	0.984771	0.999614	1.0935	0.000842517	0.000937869	0.00084471	00:00:00	667606	2022-11-10
2021-02-04	1.27407e+07	0			0.4	22128	46748.3	1.91111e+08	3930.47	2.49662		0	2021-02-04	0.56209		1	0.00307826	0.00206243	0.000840894	0.000840894	0.599459	1	0.43791	1.04886	189400	0.0263477	2.49637	0.984771	0.999604	1.09329	0.000840894	0.000935375	0.000843073	00:00:00	667813	2022-11-10
2021-02-05	1.27447e+07	0			0.4	22707.7	47974.6	1.91171e+08	4032.78	2.49706		0	2021-02-05	0.562268		1	0.00314759	0.00211653	0.000839275	0.000839275	0.59953	1	0.437732	1.04886	189700	0.026295	2.49684	0.984771	0.999594	1.09304	0.000839275	0.000932889	0.000841441	00:00:00	668024	2022-11-10
2021-02-06	1.27489e+07	0			0.4	23301	49232.6	1.91233e+08	4137.38	2.49745		0	2021-02-06	0.562451		1	0.00321829	0.00217203	0.00083766	0.00083766	0.599591	1	0.437549	1.04886	190000	0.0262424	2.49726	0.984771	0.999583	1.09276	0.00083766	0.00093041	0.000839812	00:00:00	668242	2022-11-10
2021-02-07	1.27531e+07	0			0.4	23908.1	50522.3	1.91297e+08	4244.29	2.49778		0	2021-02-07	0.562638		1	0.00329034	0.00222892	0.000836048	0.000836048	0.599645	1	0.437362	1.04886	190300	0.02619	2.49762	0.984771	0.999572	1.09244	0.000836048	0.00092794	0.000838187	00:00:00	668465	2022-11-10
2021-02-08	1.27575e+07	0			0.4	24528.9	51843.7	1.91362e+08	4353.51	2.49807		0	2021-02-08	0.56283		1	0.00336372	0.00228722	0.000834441	0.000834441	0.599692	1	0.43717	1.04886	190600	0.0261376	2.49793	0.984771	0.999561	1.09208	0.000834441	0.000925477	0.000836566	00:00:00	668693	2022-11-10
2021-02-09	1.27619e+07	0			0.4	25163.5	53197	1.91429e+08	4465.05	2.49833		0	2021-02-09	0.563027		1	0.00343843	0.00234693	0.000832837	0.000832837	0.599732	1	0.436973	1.04886	190900	0.0260853	2.4982	0.984771	0.999549	1.0917	0.000832837	0.000923023	0.000834949	00:00:00	668927	2022-11-10
2021-02-10	1.27665e+07	0			0.4	25811.9	54582.2	1.91498e+08	4578.9	2.49855		0	2021-02-10	0.563229		1	0.00351446	0.00240804	0.000831237	0.000831237	0.599767	1	0.436771	1.04886	191200	0.0260331	2.49844	0.984771	0.999538	1.09129	0.000831237	0.000920576	0.000833336	00:00:00	669168	2022-11-10
2021-02-11	1.27712e+07	0			0.4	26474.2	55999.3	1.91568e+08	4695.08	2.49874		0	2021-02-11	0.563436		1	0.00359179	0.00247056	0.000829641	0.000829641	0.599798	1	0.436564	1.04886	191500	0.0259811	2.49864	0.984771	0.999526	1.09086	0.000829641	0.000918137	0.000831727	00:00:00	669414	2022-11-10
2021-02-12	1.2776e+07	0			0.4	27150.4	57448.5	1.91641e+08	4813.59	2.4989		0	2021-02-12	0.563649		1	0.00367042	0.00253449	0.000828049	0.000828049	0.599824	1	0.436351	1.04886	191800	0.0259291	2.49882	0.984771	0.999514	1.0904	0.000828049	0.000915705	0.000830122	00:00:00	669667	2022-11-10
2021-02-13	1.2781e+07	0			0.4	27840.6	58929.9	1.91715e+08	4934.42	2.49905		0	2021-02-13	0.563866		1	0.00375032	0.00259985	0.000826461	0.000826461	0.599847	1	0.436134	1.04886	192100	0.0258772	2.49897	0.984771	0.999501	1.08992	0.000826461	0.000913281	0.000828521	00:00:00	669926	2022-11-10
2021-02-14	1.2786e+07	0			0.4	28544.6	60443.4	1.9179e+08	5057.57	2.49917		0	2021-02-14	0.564089		1	0.00383149	0.00266662	0.000824876	0.000824876	0.599867	1	0.435911	1.04886	192400	0.0258255	2.49911	0.984771	0.999488	1.08942	0.000824876	0.000910865	0.000826923	00:00:00	670192	2022-11-10
2021-02-15	1.27912e+07	0			0.4	29262.6	61989.3	1.91868e+08	5183.05	2.49928		0	2021-02-15	0.564318		1	0.00391391	0.00273482	0.000823295	0.000823295	0.599885	1	0.435682	1.04886	192700	0.0257738	2.49923	0.984771	0.999475	1.08889	0.000823295	0.000908457	0.000825329	00:00:00	670464	2022-11-10
2021-02-16	1.27965e+07	0			0.4	29994.5	63567.4	1.91948e+08	5310.83	2.49937		0	2021-02-16	0.564552		1	0.00399756	0.00280444	0.000821718	0.000821718	0.5999	1	0.435448	1.04886	193000	0.0257223	2.49933	0.984771	0.999462	1.08835	0.000821718	0.000906056	0.00082374	00:00:00	670743	2022-11-10
2021-02-17	1.2802e+07	0			0.4	30740.4	65177.9	1.92029e+08	5440.92	2.49946		0	2021-02-17	0.564792		1	0.00408242	0.00287549	0.000820145	0.000820145	0.599913	1	0.435208	1.04886	193300	0.0256709	2.49942	0.984771	0.999449	1.08778	0.000820145	0.000903663	0.000822154	00:00:00	671028	2022-11-10
2021-02-18	1.28075e+07	0			0.4	31500.1	66820.7	1.92113e+08	5573.3	2.49953		0	2021-02-18	0.565038		1	0.00416848	0.00294797	0.000818576	0.000818576	0.599924	1	0.434962	1.04886	193600	0.0256195	2.49949	0.984771	0.999435	1.0872	0.000818576	0.000901277	0.000820571	00:00:00	671321	2022-11-10
2021-02-19	1.28132e+07	0			0.4	32273.6	68495.9	1.92199e+08	5707.95	2.49959		0	2021-02-19	0.56529		1	0.0042557	0.00302188	0.00081701	0.00081701	0.599934	1	0.43471	1.04886	193900	0.0255683	2.49956	0.984771	0.999421	1.0866	0.00081701	0.000898898	0.000818993	00:00:00	671621	2022-11-10
2021-02-20	1.28191e+07	0			0.4	33060.9	70203.3	1.92286e+08	5844.86	2.49964		0	2021-02-20	0.565548		1	0.00434408	0.00309721	0.000815448	0.000815448	0.599943	1	0.434452	1.04886	194200	0.0255171	2.49962	0.984771	0.999407	1.08598	0.000815448	0.000896528	0.000817418	00:00:00	671927	2022-11-10
2021-02-21	1.28251e+07	0			0.4	33861.9	71943	1.92376e+08	5984	2.49969		0	2021-02-21	0.565812		1	0.00443357	0.00317396	0.00081389	0.00081389	0.59995	1	0.434188	1.04886	194500	0.0254661	2.49967	0.984771	0.999392	1.08534	0.00081389	0.000894164	0.000815847	00:00:00	672242	2022-11-10
2021-02-22	1.28312e+07	0			0.4	34676.4	73714.9	1.92468e+08	6125.35	2.49973		0	2021-02-22	0.566082		1	0.00452416	0.00325213	0.000812335	0.000812335	0.599957	1	0.433918	1.04886	194800	0.0254152	2.49971	0.984771	0.999378	1.08468	0.000812335	0.000891808	0.00081428	00:00:00	672563	2022-11-10
2021-02-23	1.28375e+07	0			0.4	35504.3	75518.7	1.92562e+08	6268.87	2.49977		0	2021-02-23	0.566359		1	0.00461581	0.00333171	0.000810784	0.000810784	0.599963	1	0.433641	1.04886	195100	0.0253643	2.49975	0.984771	0.999363	1.084	0.000810784	0.00088946	0.000812717	00:00:00	672892	2022-11-10
2021-02-24	1.28439e+07	0			0.4	36345.6	77354.3	1.92658e+08	6414.54	2.4998		0	2021-02-24	0.566642		1	0.00470848	0.00341269	0.000809237	0.000809237	0.599967	1	0.433358	1.04886	195400	0.0253136	2.49978	0.984771	0.999347	1.08331	0.000809237	0.000887118	0.000811157	00:00:00	673229	2022-11-10
2021-02-25	1.28504e+07	0			0.4	37199.9	79221.6	1.92757e+08	6562.31	2.49982		0	2021-02-25	0.566931		1	0.00480215	0.00349507	0.000807694	0.000807694	0.599972	1	0.433069	1.04886	195700	0.025263	2.49981	0.984771	0.999332	1.0826	0.000807694	0.000884784	0.000809601	00:00:00	673574	2022-11-10
2021-02-26	1.28572e+07	0			0.4	38067.2	81120.1	1.92857e+08	6712.14	2.49985		0	2021-02-26	0.567227		1	0.00489677	0.00357883	0.000806154	0.000806154	0.599975	1	0.432773	1.04886	196000	0.0252125	2.49984	0.984771	0.999316	1.08187	0.000806154	0.000882458	0.000808049	00:00:00	673926	2022-11-10
2021-02-27	1.2864e+07	0			0.4	38947.2	83049.7	1.9296e+08	6863.99	2.49987		0	2021-02-27	0.56753		1	0.00499231	0.00366396	0.000804618	0.000804618	0.599979	1	0.43247	1.04886	196300	0.025162	2.49986	0.984771	0.9993	1.08112	0.000804618	0.000880138	0.0008065	00:00:00	674286	2022-11-10
2021-02-28	1.2871e+07	0			0.4	39839.6	85009.9	1.93066e+08	7017.79	2.49988		0	2021-02-28	0.56784		1	0.00508871	0.00375044	0.000803085	0.000803085	0.599981	1	0.43216	1.04886	196600	0.0251117	2.49988	0.984771	0.999284	1.08035	0.000803085	0.000877826	0.000804956	00:00:00	674655	2022-11-10
2021-03-01	1.28782e+07	0			0.4	40744.3	87000.4	1.93173e+08	7173.5	2.4999		0	2021-03-01	0.568156		1	0.00518594	0.00383825	0.000801556	0.000801556	0.599984	1	0.431844	1.04886	196900	0.0250615	2.49989	0.984771	0.999268	1.07957	0.000801556	0.000875521	0.000803414	00:00:00	675031	2022-11-10
2021-03-02	1.28855e+07	0			0.4	41660.8	89020.6	1.93283e+08	7331.06	2.49991		0	2021-03-02	0.56848		1	0.00528394	0.00392738	0.000800031	0.000800031	0.599986	1	0.43152	1.04886	197200	0.0250114	2.49991	0.984771	0.999251	1.07876	0.000800031	0.000873224	0.000801877	00:00:00	675416	2022-11-10
2021-03-03	1.2893e+07	0			0.4	42588.9	91070	1.93395e+08	7490.39	2.49992		0	2021-03-03	0.56881		1	0.00538266	0.0040178	0.000798509	0.000798509	0.599988	1	0.43119	1.04886	197500	0.0249613	2.49992	0.984771	0.999234	1.07794	0.000798509	0.000870933	0.000800343	00:00:00	675809	2022-11-10
2021-03-04	1.29007e+07	0			0.4	43528.1	93148.2	1.9351e+08	7651.42	2.49993		0	2021-03-04	0.569148		1	0.00548204	0.00410948	0.000796991	0.000796991	0.599989	1	0.430852	1.04886	197800	0.0249114	2.49993	0.984771	0.999217	1.0771	0.000796991	0.00086865	0.000798813	00:00:00	676211	2022-11-10
2021-03-05	1.29085e+07	0			0.4	44478.2	95254.3	1.93627e+08	7814.07	2.49994		0	2021-03-05	0.569493		1	0.00558203	0.00420239	0.000795476	0.000795476	0.599991	1	0.430507	1.04886	198100	0.0248616	2.49994	0.984771	0.9992	1.07624	0.000795476	0.000866373	0.000797286	00:00:00	676621	2022-11-10
2021-03-06	1.29165e+07	0			0.4	45438.7	97387.7	1.93747e+08	7978.26	2.49995		0	2021-03-06	0.569845		1	0.00568255	0.00429652	0.000793965	0.000793965	0.599992	1	0.430155	1.04886	198400	0.0248119	2.49995	0.984771	0.999182	1.07537	0.000793965	0.000864104	0.000795763	00:00:00	677040	2022-11-10
2021-03-07	1.29246e+07	0			0.4	46409.1	99547.6	1.93869e+08	8143.9	2.49996		0	2021-03-07	0.570204		1	0.00578356	0.0043918	0.000792458	0.000792458	0.599993	1	0.429796	1.04886	198700	0.0247622	2.49995	0.984771	0.999165	1.07447	0.000792458	0.000861842	0.000794244	00:00:00	677468	2022-11-10
2021-03-08	1.29329e+07	0			0.4	47388.9	101733	1.93994e+08	8310.9	2.49996		0	2021-03-08	0.57057		1	0.00588497	0.00448823	0.000790954	0.000790954	0.599994	1	0.42943	1.04886	199000	0.0247127	2.49996	0.984771	0.999147	1.07356	0.000790954	0.000859586	0.000792728	00:00:00	677904	2022-11-10
2021-03-09	1.29414e+07	0			0.4	48377.7	103943	1.94121e+08	8479.14	2.49997		0	2021-03-09	0.570945		1	0.00598672	0.00458574	0.000789454	0.000789454	0.599995	1	0.429055	1.04886	199300	0.0246633	2.49996	0.984771	0.999129	1.07262	0.000789454	0.000857338	0.000791216	00:00:00	678349	2022-11-10
2021-03-10	1.29501e+07	0			0.4	49374.8	106177	1.94251e+08	8648.53	2.49997		0	2021-03-10	0.571326		1	0.00608873	0.0046843	0.000787957	0.000787957	0.599995	1	0.428674	1.04886	199600	0.024614	2.49997	0.984771	0.999111	1.07167	0.000787957	0.000855097	0.000789707	00:00:00	678803	2022-11-10
2021-03-11	1.29589e+07	0			0.4	50379.7	108434	1.94383e+08	8818.95	2.49998		0	2021-03-11	0.571715		1	0.00619091	0.00478385	0.000786464	0.000786464	0.599996	1	0.428285	1.04886	199900	0.0245647	2.49997	0.984771	0.999092	1.0707	0.000786464	0.000852862	0.000788202	00:00:00	679266	2022-11-10
2021-03-12	1.29679e+07	0			0.4	51391.7	110712	1.94518e+08	8990.28	2.49998		0	2021-03-12	0.572112		1	0.0062932	0.00488436	0.000784974	0.000784974	0.599997	1	0.427888	1.04886	200200	0.0245156	2.49998	0.984771	0.999074	1.06971	0.000784974	0.000850635	0.0007867	00:00:00	679738	2022-11-10
2021-03-13	1.2977e+07	0			0.4	52410.2	113011	1.94655e+08	9162.39	2.49998		0	2021-03-13	0.572516		1	0.0063955	0.00498576	0.000783488	0.000783488	0.599997	1	0.427484	1.04886	200500	0.0244666	2.49998	0.984771	0.999055	1.0687	0.000783488	0.000848414	0.000785202	00:00:00	680219	2022-11-10
2021-03-14	1.29864e+07	0			0.4	53434.4	115328	1.94795e+08	9335.15	2.49998		0	2021-03-14	0.572928		1	0.00649773	0.005088	0.000782005	0.000782005	0.599997	1	0.427072	1.04886	200800	0.0244176	2.49998	0.984771	0.999037	1.06767	0.000782005	0.0008462	0.000783708	00:00:00	680709	2022-11-10
2021-03-15	1.29959e+07	0			0.4	54463.7	117663	1.94938e+08	9508.43	2.49999		0	2021-03-15	0.573347		1	0.00659978	0.00519101	0.000780525	0.000780525	0.599998	1	0.426653	1.04886	201100	0.0243688	2.49998	0.984771	0.999018	1.06663	0.000780525	0.000843993	0.000782217	00:00:00	681209	2022-11-10
2021-03-16	1.30056e+07	0			0.4	55497.3	120014	1.95083e+08	9682.08	2.49999		0	2021-03-16	0.573775		1	0.00670158	0.00529473	0.00077905	0.00077905	0.599998	1	0.426225	1.04886	201400	0.0243201	2.49999	0.984771	0.998999	1.06556	0.00077905	0.000841793	0.000780729	00:00:00	681717	2022-11-10
2021-03-17	1.30154e+07	0			0.4	56534.3	122379	1.95231e+08	9855.94	2.49999		0	2021-03-17	0.574209		1	0.00680301	0.00539909	0.000777577	0.000777577	0.599998	1	0.425791	1.04886	201700	0.0242714	2.49999	0.984771	0.99898	1.06447	0.000777577	0.0008396	0.000779245	00:00:00	682234	2022-11-10
2021-03-18	1.30254e+07	0			0.4	57573.9	124758	1.95382e+08	10029.9	2.49999		0	2021-03-18	0.574652		1	0.00690399	0.00550402	0.000776108	0.000776108	0.599999	1	0.425348	1.04886	202000	0.0242229	2.49999	0.984771	0.998961	1.06337	0.000776108	0.000837413	0.000777765	00:00:00	682761	2022-11-10
2021-03-19	1.30356e+07	0			0.4	58615.2	127147	1.95535e+08	10203.7	2.49999		0	2021-03-19	0.575102		1	0.00700439	0.00560945	0.000774642	0.000774642	0.599999	1	0.424898	1.04886	202300	0.0241744	2.49999	0.984771	0.998942	1.06224	0.000774642	0.000835233	0.000776288	00:00:00	683297	2022-11-10
2021-03-20	1.3046e+07	0			0.4	59657.2	129546	1.9569e+08	10377.2	2.49999		0	2021-03-20	0.57556		1	0.00710413	0.00571529	0.00077318	0.00077318	0.599999	1	0.42444	1.04886	202600	0.0241261	2.49999	0.984771	0.998923	1.0611	0.00077318	0.00083306	0.000774814	00:00:00	683841	2022-11-10
2021-03-21	1.30566e+07	0			0.4	60699.2	131953	1.95849e+08	10550.4	2.49999		0	2021-03-21	0.576025		1	0.00720308	0.00582145	0.000771722	0.000771722	0.599999	1	0.423975	1.04886	202900	0.0240778	2.49999	0.984771	0.998903	1.05993	0.000771722	0.000830893	0.000773344	00:00:00	684395	2022-11-10
2021-03-22	1.30673e+07	0			0.4	61740	134365	1.96009e+08	10722.9	2.49999		0	2021-03-22	0.576498		1	0.00730114	0.00592786	0.000770266	0.000770266	0.599999	1	0.423502	1.04886	203200	0.0240297	2.49999	0.984771	0.998884	1.05875	0.000770266	0.000828733	0.000771878	00:00:00	684958	2022-11-10
2021-03-23	1.30782e+07	0			0.4	62778.6	136780	1.96173e+08	10894.6	2.5		0	2021-03-23	0.576979		1	0.00739819	0.00603443	0.000768814	0.000768814	0.599999	1	0.423021	1.04886	203500	0.0239816	2.5	0.984771	0.998865	1.05755	0.000768814	0.00082658	0.000770414	00:00:00	685530	2022-11-10
2021-03-24	1.30893e+07	0			0.4	63814	139197	1.96339e+08	11065.3	2.5		0	2021-03-24	0.577467		1	0.00749412	0.00614105	0.000767366	0.000767366	0.599999	1	0.422533	1.04886	203800	0.0239337	2.5	0.984771	0.998846	1.05633	0.000767366	0.000824433	0.000768955	00:00:00	686111	2022-11-10
2021-03-25	1.31005e+07	0			0.4	64845.1	141613	1.96507e+08	11234.8	2.5		0	2021-03-25	0.577963		1	0.00758881	0.00624763	0.00076592	0.00076592	0.599999	1	0.422037	1.04886	204100	0.0238858	2.5	0.984771	0.998827	1.05509	0.00076592	0.000822292	0.000767498	00:00:00	686701	2022-11-10
2021-03-26	1.31119e+07	0			0.4	65870.7	144026	1.96678e+08	11402.9	2.5		0	2021-03-26	0.578466		1	0.00768213	0.00635407	0.000764478	0.000764478	0.6	1	0.421534	1.04886	204400	0.023838	2.5	0.984771	0.998808	1.05383	0.000764478	0.000820159	0.000766045	00:00:00	687300	2022-11-10
2021-03-27	1.31235e+07	0			0.4	66889.8	146433	1.96852e+08	11569.5	2.5		0	2021-03-27	0.578976		1	0.00777397	0.00646026	0.00076304	0.00076304	0.6	1	0.421024	1.04886	204700	0.0237903	2.5	0.984771	0.998789	1.05256	0.00076304	0.000818031	0.000764595	00:00:00	687907	2022-11-10
2021-03-28	1.31352e+07	0			0.4	67901.2	148832	1.97028e+08	11734.2	2.5		0	2021-03-28	0.579494		1	0.00786421	0.0065661	0.000761605	0.000761605	0.6	1	0.420506	1.04886	205000	0.0237428	2.5	0.984771	0.99877	1.05126	0.000761605	0.000815911	0.000763149	00:00:00	688523	2022-11-10
2021-03-29	1.31471e+07	0			0.4	68903.7	151220	1.97206e+08	11897	2.5		0	2021-03-29	0.580019		1	0.00795271	0.00667148	0.000760173	0.000760173	0.6	1	0.419981	1.04886	205300	0.0236953	2.5	0.984771	0.998752	1.04995	0.000760173	0.000813796	0.000761706	00:00:00	689148	2022-11-10
2021-03-30	1.31592e+07	0			0.4	69896	153596	1.97387e+08	12057.6	2.5		0	2021-03-30	0.580551		1	0.00803936	0.00677628	0.000758744	0.000758744	0.6	1	0.419449	1.04886	205600	0.0236479	2.5	0.984771	0.998733	1.04862	0.000758744	0.000811689	0.000760267	00:00:00	689781	2022-11-10
2021-03-31	1.31714e+07	0			0.4	70877	155956	1.97571e+08	12215.8	2.5		0	2021-03-31	0.58109		1	0.00812404	0.00688039	0.000757319	0.000757319	0.6	1	0.41891	1.04886	205900	0.0236006	2.5	0.984771	0.998715	1.04728	0.000757319	0.000809587	0.000758831	00:00:00	690422	2022-11-10
2021-04-01	1.31837e+07	0			0.4	71845.4	158297	1.97756e+08	12371.3	2.5		0	2021-04-01	0.581636		1	0.00820661	0.00698369	0.000755897	0.000755897	0.6	1	0.418364	1.04886	206200	0.0235534	2.5	0.984771	0.998697	1.04591	0.000755897	0.000807492	0.000757398	00:00:00	691072	2022-11-10
2021-04-02	1.31963e+07	0			0.4	72799.9	160617	1.97944e+08	12524	2.5		0	2021-04-02	0.582188		1	0.00828695	0.00708606	0.000754478	0.000754478	0.6	1	0.417812	1.04886	206500	0.0235063	2.5	0.984771	0.998679	1.04453	0.000754478	0.000805403	0.000755968	00:00:00	691729	2022-11-10
2021-04-03	1.32089e+07	0			0.4	73739.2	162914	1.98134e+08	12673.6	2.5		0	2021-04-03	0.582747		1	0.00836494	0.00718737	0.000753063	0.000753063	0.6	1	0.417253	1.04886	206800	0.0234593	2.5	0.984771	0.998662	1.04313	0.000753063	0.000803321	0.000754542	00:00:00	692394	2022-11-10
2021-04-04	1.32218e+07	0			0.4	74662.2	165183	1.98326e+08	12820	2.5		0	2021-04-04	0.583313		1	0.00844045	0.0072875	0.000751651	0.000751651	0.6	1	0.416687	1.04886	207100	0.0234124	2.5	0.984771	0.998644	1.04172	0.000751651	0.000801245	0.000753119	00:00:00	693067	2022-11-10
2021-04-05	1.32347e+07	0			0.4	75567.4	167423	1.98521e+08	12962.8	2.5		0	2021-04-05	0.583885		1	0.00851337	0.00738632	0.000750242	0.000750242	0.6	1	0.416115	1.04886	207400	0.0233655	2.5	0.984771	0.998628	1.04029	0.000750242	0.000799175	0.000751699	00:00:00	693748	2022-11-10
2021-04-06	1.32478e+07	0			0.4	76453.6	169631	1.98717e+08	13102	2.5		0	2021-04-06	0.584463		1	0.00858357	0.0074837	0.000748836	0.000748836	0.6	1	0.415537	1.04886	207700	0.0233188	2.5	0.984771	0.998611	1.03884	0.000748836	0.000797112	0.000750283	00:00:00	694436	2022-11-10
2021-04-07	1.32611e+07	0			0.4	77319.5	171803	1.98916e+08	13237.2	2.5		0	2021-04-07	0.585047		1	0.00865093	0.00757953	0.000747434	0.000747434	0.6	1	0.414953	1.04886	208000	0.0232722	2.5	0.984771	0.998595	1.03738	0.000747434	0.000795054	0.00074887	00:00:00	695131	2022-11-10
2021-04-08	1.32744e+07	0			0.4	78163.9	173936	1.99116e+08	13368.3	2.5		0	2021-04-08	0.585636		1	0.00871534	0.00767365	0.000746034	0.000746034	0.6	1	0.414364	1.04886	208300	0.0232256	2.5	0.984771	0.998579	1.03591	0.000746034	0.000793003	0.00074746	00:00:00	695833	2022-11-10
2021-04-09	1.32879e+07	0			0.4	78985.4	176028	1.99319e+08	13495.1	2.5		0	2021-04-09	0.586232		1	0.00877668	0.00776596	0.000744638	0.000744638	0.6	1	0.413768	1.04886	208600	0.0231792	2.5	0.984771	0.998563	1.03442	0.000744638	0.000790958	0.000746054	00:00:00	696541	2022-11-10
2021-04-10	1.33015e+07	0			0.4	79782.8	178076	1.99523e+08	13617.4	2.5		0	2021-04-10	0.586833		1	0.00883485	0.0078563	0.000743246	0.000743246	0.6	1	0.413167	1.04886	208900	0.0231328	2.5	0.984771	0.998548	1.03292	0.000743246	0.00078892	0.00074465	00:00:00	697256	2022-11-10
2021-04-11	1.33153e+07	0			0.4	80554.8	180077	1.99729e+08	13734.9	2.5		0	2021-04-11	0.587439		1	0.00888974	0.00794457	0.000741856	0.000741856	0.6	1	0.412561	1.04886	209200	0.0230865	2.5	0.984771	0.998533	1.0314	0.000741856	0.000786887	0.00074325	00:00:00	697977	2022-11-10
2021-04-12	1.33291e+07	0			0.4	81300.3	182027	1.99937e+08	13847.4	2.5		0	2021-04-12	0.588049		1	0.00894124	0.00803061	0.00074047	0.00074047	0.6	1	0.411951	1.04886	209500	0.0230404	2.5	0.984771	0.998519	1.02988	0.00074047	0.000784861	0.000741853	00:00:00	698704	2022-11-10
2021-04-13	1.33431e+07	0			0.4	82017.9	183925	2.00146e+08	13954.9	2.5		0	2021-04-13	0.588665		1	0.00898925	0.00811432	0.000739086	0.000739086	0.6	1	0.411335	1.04886	209800	0.0229943	2.5	0.984771	0.998506	1.02834	0.000739086	0.00078284	0.00074046	00:00:00	699437	2022-11-10
2021-04-14	1.33571e+07	0			0.4	82706.6	185766	2.00357e+08	14057	2.5		0	2021-04-14	0.589285		1	0.00903368	0.00819555	0.000737706	0.000737706	0.6	1	0.410715	1.04886	210100	0.0229483	2.5	0.984771	0.998492	1.02679	0.000737706	0.000780826	0.000739069	00:00:00	700175	2022-11-10
2021-04-15	1.33713e+07	0			0.4	83365.2	187548	2.00569e+08	14153.7	2.5		0	2021-04-15	0.58991		1	0.00907445	0.00827418	0.000736329	0.000736329	0.6	1	0.41009	1.04886	210400	0.0229024	2.5	0.984771	0.99848	1.02523	0.000736329	0.000778818	0.000737682	00:00:00	700918	2022-11-10
2021-04-16	1.33855e+07	0			0.4	83992.5	189269	2.00783e+08	14244.7	2.5		0	2021-04-16	0.590538		1	0.00911146	0.0083501	0.000734956	0.000734956	0.6	1	0.409462	1.04886	210700	0.0228566	2.5	0.984771	0.998468	1.02365	0.000734956	0.000776816	0.000736298	00:00:00	701666	2022-11-10
2021-04-17	1.33999e+07	0			0.4	84587.6	190925	2.00998e+08	14329.9	2.5		0	2021-04-17	0.59117		1	0.00914463	0.00842317	0.000733585	0.000733585	0.6	1	0.40883	1.04886	211000	0.0228109	2.5	0.984771	0.998456	1.02207	0.000733585	0.000774819	0.000734917	00:00:00	702418	2022-11-10
2021-04-18	1.34143e+07	0			0.4	85149.3	192514	2.01214e+08	14409.1	2.5		0	2021-04-18	0.591806		1	0.0091739	0.00849328	0.000732217	0.000732217	0.6	1	0.408194	1.04886	211300	0.0227653	2.5	0.984771	0.998445	1.02048	0.000732217	0.000772829	0.000733539	00:00:00	703174	2022-11-10
2021-04-19	1.34288e+07	0			0.4	85676.7	194034	2.01431e+08	14482.3	2.5		0	2021-04-19	0.592445		1	0.0091992	0.00856031	0.000730853	0.000730853	0.6	1	0.407555	1.04886	211600	0.0227197	2.5	0.984771	0.998435	1.01889	0.000730853	0.000770845	0.000732165	00:00:00	703935	2022-11-10
2021-04-20	1.34433e+07	0			0.4	86168.8	195481	2.0165e+08	14549.1	2.5		0	2021-04-20	0.593087		1	0.00922047	0.00862416	0.000729492	0.000729492	0.6	1	0.406913	1.04886	211900	0.0226743	2.5	0.984771	0.998425	1.01728	0.000729492	0.000768867	0.000730793	00:00:00	704699	2022-11-10
2021-04-21	1.34579e+07	0			0.4	86624.8	196853	2.01869e+08	14609.7	2.5		0	2021-04-21	0.593731		1	0.00923764	0.00868471	0.000728134	0.000728134	0.6	1	0.406269	1.04886	212200	0.0226289	2.5	0.984771	0.998416	1.01567	0.000728134	0.000766894	0.000729425	00:00:00	705466	2022-11-10
2021-04-22	1.34726e+07	0			0.4	87043.8	198149	2.02089e+08	14663.7	2.5		0	2021-04-22	0.594378		1	0.00925068	0.00874186	0.000726778	0.000726778	0.6	1	0.405622	1.04886	212500	0.0225837	2.5	0.984771	0.998408	1.01405	0.000726778	0.000764928	0.00072806	00:00:00	706235	2022-11-10
2021-04-23	1.34873e+07	0			0.4	87425.1	199365	2.02309e+08	14711.2	2.5		0	2021-04-23	0.595027		1	0.00925955	0.00879551	0.000725426	0.000725426	0.6	1	0.404973	1.04886	212800	0.0225385	2.5	0.984771	0.9984	1.01243	0.000725426	0.000762967	0.000726698	00:00:00	707008	2022-11-10
2021-04-24	1.3502e+07	0			0.4	87768	200500	2.02531e+08	14752	2.5		0	2021-04-24	0.595678		1	0.00926421	0.00884557	0.000724077	0.000724077	0.6	1	0.404322	1.04886	213100	0.0224934	2.5	0.984771	0.998393	1.0108	0.000724077	0.000761012	0.000725339	00:00:00	707782	2022-11-10
2021-04-25	1.35168e+07	0			0.4	88071.8	201551	2.02752e+08	14786	2.5		0	2021-04-25	0.59633		1	0.00926465	0.00889194	0.000722732	0.000722732	0.6	1	0.40367	1.04886	213400	0.0224485	2.5	0.984771	0.998387	1.00917	0.000722732	0.000759063	0.000723983	00:00:00	708559	2022-11-10
2021-04-26	1.35316e+07	0			0.4	88335.9	202517	2.02975e+08	14813.3	2.5		0	2021-04-26	0.596984		1	0.00926083	0.00893456	0.000721389	0.000721389	0.6	1	0.403016	1.04886	213700	0.0224036	2.5	0.984771	0.998381	1.00754	0.000721389	0.00075712	0.00072263	00:00:00	709336	2022-11-10
2021-04-27	1.35465e+07	0			0.4	88559.9	203395	2.03197e+08	14833.7	2.5		0	2021-04-27	0.597638		1	0.00925275	0.00897333	0.000720049	0.000720049	0.6	1	0.402362	1.04886	214000	0.0223588	2.5	0.984771	0.998376	1.0059	0.000720049	0.000755183	0.000721281	00:00:00	710115	2022-11-10
2021-04-28	1.35613e+07	0			0.4	88743.3	204185	2.0342e+08	14847.1	2.5		0	2021-04-28	0.598293		1	0.00924042	0.00900818	0.000718712	0.000718712	0.6	1	0.401707	1.04886	214300	0.022314	2.5	0.984771	0.998372	1.00427	0.000718712	0.000753251	0.000719934	00:00:00	710894	2022-11-10
2021-04-29	1.35762e+07	0			0.4	88885.8	204885	2.03643e+08	14853.7	2.5		0	2021-04-29	0.598949		1	0.00922383	0.00903906	0.000717378	0.000717378	0.6	1	0.401051	1.04886	214600	0.0222694	2.5	0.984771	0.998369	1.00263	0.000717378	0.000751325	0.000718591	00:00:00	711674	2022-11-10
2021-04-30	1.3591e+07	0			0.4	88987	205494	2.03865e+08	14853.2	2.5		0	2021-04-30	0.599604		1	0.009203	0.00906591	0.000716048	0.000716048	0.6	1	0.400396	1.04886	214900	0.0222249	2.5	0.984771	0.998366	1.00099	0.000716048	0.000749405	0.00071725	00:00:00	712454	2022-11-10
2021-05-01	1.36059e+07	0			0.4	89046.8	206010	2.04088e+08	14845.8	2.5		0	2021-05-01	0.600259		1	0.00917795	0.00908867	0.00071472	0.00071472	0.6	1	0.399741	1.04886	215200	0.0221804	2.5	0.984771	0.998364	0.999352	0.00071472	0.000747491	0.000715913	00:00:00	713233	2022-11-10
2021-05-02	1.36207e+07	0			0.4	89065	206432	2.04311e+08	14831.5	2.5		0	2021-05-02	0.600913		1	0.00914872	0.00910731	0.000713395	0.000713395	0.6	1	0.399087	1.04886	215500	0.0221361	2.5	0.984771	0.998363	0.997717	0.000713395	0.000745582	0.000714578	00:00:00	714012	2022-11-10
2021-05-03	1.36355e+07	0			0.4	89041.6	206760	2.04533e+08	14810.3	2.5		0	2021-05-03	0.601567		1	0.00911533	0.00912178	0.000712074	0.000712074	0.6	1	0.398433	1.04886	215800	0.0220918	2.5	0.984771	0.998363	0.996083	0.000712074	0.000743679	0.000713247	00:00:00	714790	2022-11-10
2021-05-04	1.36503e+07	0			0.4	88976.7	206993	2.04754e+08	14782.1	2.5		0	2021-05-04	0.602219		1	0.00907785	0.00913206	0.000710755	0.000710755	0.6	1	0.397781	1.04886	216100	0.0220476	2.5	0.984771	0.998363	0.994453	0.000710755	0.000741781	0.000711919	00:00:00	715566	2022-11-10
2021-05-05	1.3665e+07	0			0.4	88870.2	207131	2.04976e+08	14747.2	2.5		0	2021-05-05	0.60287		1	0.0090363	0.00913813	0.000709439	0.000709439	0.6	1	0.39713	1.04886	216400	0.0220035	2.5	0.984771	0.998364	0.992826	0.000709439	0.00073989	0.000710593	00:00:00	716340	2022-11-10
2021-05-06	1.36797e+07	0			0.4	88722.4	207173	2.05196e+08	14705.4	2.5		0	2021-05-06	0.603518		1	0.00899077	0.00913997	0.000708126	0.000708126	0.6	1	0.396482	1.04886	216700	0.0219595	2.5	0.984771	0.998366	0.991204	0.000708126	0.000738003	0.000709271	00:00:00	717112	2022-11-10
2021-05-07	1.36944e+07	0			0.4	88533.6	207118	2.05416e+08	14657	2.5		0	2021-05-07	0.604165		1	0.00894131	0.00913758	0.000706816	0.000706816	0.6	1	0.395835	1.04886	217000	0.0219156	2.5	0.984771	0.998369	0.989588	0.000706816	0.000736123	0.000707952	00:00:00	717881	2022-11-10
2021-05-08	1.3709e+07	0			0.4	88304	206968	2.05635e+08	14602	2.5		0	2021-05-08	0.604809		1	0.008888	0.00913096	0.00070551	0.00070551	0.6	1	0.395191	1.04886	217300	0.0218718	2.5	0.984771	0.998373	0.987977	0.00070551	0.000734247	0.000706635	00:00:00	718648	2022-11-10
2021-05-09	1.37235e+07	0			0.4	88034.1	206723	2.05853e+08	14540.4	2.5		0	2021-05-09	0.605451		1	0.00883093	0.00912012	0.000704206	0.000704206	0.6	1	0.394549	1.04886	217600	0.021828	2.5	0.984771	0.998377	0.986373	0.000704206	0.000732378	0.000705322	00:00:00	719411	2022-11-10
2021-05-10	1.3738e+07	0			0.4	87724.4	206382	2.0607e+08	14472.4	2.5		0	2021-05-10	0.606089		1	0.00877017	0.00910508	0.000702905	0.000702905	0.6	1	0.393911	1.04886	217900	0.0217844	2.5	0.984771	0.998382	0.984777	0.000702905	0.000730514	0.000704011	00:00:00	720171	2022-11-10
2021-05-11	1.37524e+07	0			0.4	87375.4	205946	2.06286e+08	14398.2	2.5		0	2021-05-11	0.606724		1	0.00870582	0.00908587	0.000701606	0.000701606	0.6	1	0.393276	1.04886	218200	0.0217408	2.5	0.984771	0.998387	0.983189	0.000701606	0.000728655	0.000702704	00:00:00	720927	2022-11-10
2021-05-12	1.37667e+07	0			0.4	86987.7	205417	2.06501e+08	14317.8	2.5		0	2021-05-12	0.607356		1	0.00863798	0.00906251	0.000700311	0.000700311	0.6	1	0.392644	1.04886	218500	0.0216973	2.5	0.984771	0.998394	0.98161	0.000700311	0.000726802	0.000701399	00:00:00	721679	2022-11-10
2021-05-13	1.3781e+07	0			0.4	86562	204795	2.06715e+08	14231.3	2.5		0	2021-05-13	0.607984		1	0.00856676	0.00903506	0.000699019	0.000699019	0.6	1	0.392016	1.04886	218800	0.0216539	2.5	0.984771	0.998401	0.98004	0.000699019	0.000724954	0.000700098	00:00:00	722426	2022-11-10
2021-05-14	1.37951e+07	0			0.4	86099.1	204080	2.06927e+08	14139	2.5		0	2021-05-14	0.608608		1	0.00849226	0.00900355	0.00069773	0.00069773	0.6	1	0.391392	1.04886	219100	0.0216106	2.5	0.984771	0.998409	0.978481	0.00069773	0.000723112	0.000698799	00:00:00	723168	2022-11-10
2021-05-15	1.38091e+07	0			0.4	85599.8	203276	2.07137e+08	14041.1	2.5		0	2021-05-15	0.609227		1	0.0084146	0.00896805	0.000696443	0.000696443	0.6	1	0.390773	1.04886	219400	0.0215674	2.5	0.984771	0.998417	0.976932	0.000696443	0.000721275	0.000697503	00:00:00	723905	2022-11-10
2021-05-16	1.38231e+07	0			0.4	85064.9	202382	2.07346e+08	13937.5	2.5		0	2021-05-16	0.609842		1	0.0083339	0.00892861	0.000695159	0.000695159	0.6	1	0.390158	1.04886	219700	0.0215242	2.5	0.984771	0.998426	0.975395	0.000695159	0.000719444	0.000696211	00:00:00	724637	2022-11-10
2021-05-17	1.38369e+07	0			0.4	84495.4	201400	2.07554e+08	13828.6	2.5		0	2021-05-17	0.610452		1	0.00825028	0.0088853	0.000693879	0.000693879	0.6	1	0.389548	1.04886	220000	0.0214812	2.5	0.984771	0.998436	0.97387	0.000693879	0.000717618	0.000694921	00:00:00	725363	2022-11-10
2021-05-18	1.38506e+07	0			0.4	83892.2	200333	2.07759e+08	13714.6	2.5		0	2021-05-18	0.611057		1	0.00816387	0.0088382	0.000692601	0.000692601	0.6	1	0.388943	1.04886	220300	0.0214382	2.5	0.984771	0.998447	0.972357	0.000692601	0.000715797	0.000693634	00:00:00	726083	2022-11-10
2021-05-19	1.38642e+07	0			0.4	83256.4	199181	2.07963e+08	13595.5	2.5		0	2021-05-19	0.611657		1	0.0080748	0.00878739	0.000691326	0.000691326	0.6	1	0.388343	1.04886	220600	0.0213954	2.5	0.984771	0.998458	0.970858	0.000691326	0.000713981	0.000692349	00:00:00	726797	2022-11-10
2021-05-20	1.38777e+07	0			0.4	82589	197947	2.08165e+08	13471.7	2.5		0	2021-05-20	0.612251		1	0.0079832	0.00873296	0.000690053	0.000690053	0.6	1	0.387749	1.04886	220900	0.0213526	2.5	0.984771	0.99847	0.969372	0.000690053	0.000712171	0.000691068	00:00:00	727504	2022-11-10
2021-05-21	1.3891e+07	0			0.4	81891.2	196633	2.08366e+08	13343.2	2.5		0	2021-05-21	0.61284		1	0.0078892	0.008675	0.000688784	0.000688784	0.6	1	0.38716	1.04886	221200	0.0213099	2.5	0.984771	0.998482	0.9679	0.000688784	0.000710367	0.00068979	00:00:00	728205	2022-11-10
2021-05-22	1.39042e+07	0			0.4	81164.1	195242	2.08564e+08	13210.4	2.5		0	2021-05-22	0.613423		1	0.00779294	0.00861361	0.000687518	0.000687518	0.6	1	0.386577	1.04886	221500	0.0212672	2.5	0.984771	0.998495	0.966443	0.000687518	0.000708567	0.000688514	00:00:00	728898	2022-11-10
2021-05-23	1.39173e+07	0			0.4	80408.9	193775	2.0876e+08	13073.4	2.5		0	2021-05-23	0.613999		1	0.00769457	0.00854889	0.000686254	0.000686254	0.6	1	0.386001	1.04886	221800	0.0212247	2.5	0.984771	0.998508	0.965001	0.000686254	0.000706773	0.000687242	00:00:00	729585	2022-11-10
2021-05-24	1.39303e+07	0			0.4	79626.8	192235	2.08954e+08	12932.4	2.5		0	2021-05-24	0.61457		1	0.00759421	0.00848095	0.000684993	0.000684993	0.6	1	0.38543	1.04886	222100	0.0211823	2.5	0.984771	0.998522	0.963575	0.000684993	0.000704984	0.000685972	00:00:00	730264	2022-11-10
2021-05-25	1.3943e+07	0			0.4	78819	190624	2.09146e+08	12787.7	2.5		0	2021-05-25	0.615134		1	0.00749201	0.0084099	0.000683735	0.000683735	0.6	1	0.384866	1.04886	222400	0.0211399	2.5	0.984771	0.998536	0.962164	0.000683735	0.0007032	0.000684705	00:00:00	730935	2022-11-10
2021-05-26	1.39557e+07	0			0.4	77986.7	188946	2.09335e+08	12639.5	2.5		0	2021-05-26	0.615692		1	0.00738812	0.00833586	0.000682479	0.000682479	0.6	1	0.384308	1.04886	222700	0.0210976	2.5	0.984771	0.998551	0.96077	0.000682479	0.000701421	0.000683441	00:00:00	731599	2022-11-10
2021-05-27	1.39682e+07	0			0.4	77131.4	187203	2.09523e+08	12487.9	2.5		0	2021-05-27	0.616243		1	0.00728266	0.00825894	0.000681227	0.000681227	0.6	1	0.383757	1.04886	223000	0.0210554	2.5	0.984771	0.998566	0.959393	0.000681227	0.000699648	0.000682179	00:00:00	732254	2022-11-10
2021-05-28	1.39805e+07	0			0.4	76254.2	185397	2.09708e+08	12333.2	2.5		0	2021-05-28	0.616787		1	0.00717578	0.00817927	0.000679977	0.000679977	0.6	1	0.383213	1.04886	223300	0.0210133	2.5	0.984771	0.998582	0.958033	0.000679977	0.00069788	0.000680921	00:00:00	732902	2022-11-10
2021-05-29	1.39927e+07	0			0.4	75356.4	183531	2.0989e+08	12175.7	2.5		0	2021-05-29	0.617324		1	0.00706762	0.00809698	0.00067873	0.00067873	0.6	1	0.382676	1.04886	223600	0.0209713	2.5	0.984771	0.998598	0.95669	0.00067873	0.000696117	0.000679665	00:00:00	733541	2022-11-10
2021-05-30	1.40047e+07	0			0.4	74439.4	181609	2.1007e+08	12015.5	2.5		0	2021-05-30	0.617854		1	0.00695832	0.00801218	0.000677486	0.000677486	0.6	1	0.382146	1.04886	223900	0.0209293	2.5	0.984771	0.998615	0.955365	0.000677486	0.000694359	0.000678412	00:00:00	734172	2022-11-10
2021-05-31	1.40165e+07	0			0.4	73504.5	179634	2.10248e+08	11852.8	2.5		0	2021-05-31	0.618377		1	0.00684801	0.00792501	0.000676245	0.000676245	0.6	1	0.381623	1.04886	224200	0.0208875	2.5	0.984771	0.998632	0.954057	0.000676245	0.000692606	0.000677162	00:00:00	734794	2022-11-10
2021-06-01	1.40282e+07	0			0.4	72552.9	177607	2.10424e+08	11687.9	2.5		0	2021-06-01	0.618893		1	0.00673682	0.0078356	0.000675006	0.000675006	0.6	1	0.381107	1.04886	224500	0.0208457	2.5	0.984771	0.998649	0.952768	0.000675006	0.000690858	0.000675915	00:00:00	735408	2022-11-10
2021-06-02	1.40398e+07	0			0.4	71586.1	175532	2.10596e+08	11521	2.5		0	2021-06-02	0.619401		1	0.0066249	0.00774408	0.00067377	0.00067377	0.6	1	0.380599	1.04886	224800	0.020804	2.5	0.984771	0.998666	0.951498	0.00067377	0.000689115	0.00067467	00:00:00	736012	2022-11-10
2021-06-03	1.40511e+07	0			0.4	70605.2	173413	2.10767e+08	11352.3	2.5		0	2021-06-03	0.619902		1	0.00651236	0.00765057	0.000672537	0.000672537	0.6	1	0.380098	1.04886	225100	0.0207624	2.5	0.984771	0.998684	0.950245	0.000672537	0.000687378	0.000673428	00:00:00	736608	2022-11-10
2021-06-04	1.40623e+07	0			0.4	69611.6	171252	2.10934e+08	11182	2.5		0	2021-06-04	0.620395		1	0.00639935	0.00755523	0.000671306	0.000671306	0.6	1	0.379605	1.04886	225400	0.0207209	2.5	0.984771	0.998702	0.949012	0.000671306	0.000685645	0.000672189	00:00:00	737195	2022-11-10
2021-06-05	1.40733e+07	0			0.4	68606.5	169052	2.111e+08	11010.4	2.5		0	2021-06-05	0.620881		1	0.00628597	0.00745817	0.000670078	0.000670078	0.6	1	0.379119	1.04886	225700	0.0206794	2.5	0.984771	0.99872	0.947798	0.000670078	0.000683917	0.000670953	00:00:00	737774	2022-11-10
2021-06-06	1.40841e+07	0			0.4	67591.2	166816	2.11262e+08	10837.5	2.5		0	2021-06-06	0.621359		1	0.00617236	0.00735952	0.000668853	0.000668853	0.6	1	0.378641	1.04886	226000	0.0206381	2.5	0.984771	0.998739	0.946602	0.000668853	0.000682195	0.000669719	00:00:00	738342	2022-11-10
2021-06-07	1.40948e+07	0			0.4	66566.9	164547	2.11422e+08	10663.7	2.5		0	2021-06-07	0.621829		1	0.00605862	0.00725943	0.000667631	0.000667631	0.6	1	0.378171	1.04886	226300	0.0205968	2.5	0.984771	0.998758	0.945426	0.000667631	0.000680477	0.000668488	00:00:00	738902	2022-11-10
2021-06-08	1.41053e+07	0			0.4	65534.9	162248	2.11579e+08	10489	2.5		0	2021-06-08	0.622292		1	0.00594488	0.00715802	0.000666411	0.000666411	0.6	1	0.377708	1.04886	226600	0.0205556	2.5	0.984771	0.998776	0.944269	0.000666411	0.000678764	0.00066726	00:00:00	739453	2022-11-10
2021-06-09	1.41156e+07	0			0.4	64496.4	159923	2.11734e+08	10313.8	2.5		0	2021-06-09	0.622747		1	0.00583125	0.00705541	0.000665194	0.000665194	0.6	1	0.377253	1.04886	226900	0.0205145	2.5	0.984771	0.998795	0.943132	0.000665194	0.000677057	0.000666035	00:00:00	739994	2022-11-10
2021-06-10	1.41257e+07	0			0.4	63452.4	157573	2.11886e+08	10138.1	2.5		0	2021-06-10	0.623195		1	0.00571783	0.00695174	0.00066398	0.00066398	0.6	1	0.376805	1.04886	227200	0.0204735	2.5	0.984771	0.998814	0.942014	0.00066398	0.000675354	0.000664812	00:00:00	740527	2022-11-10
2021-06-11	1.41357e+07	0			0.4	62404.2	155202	2.12036e+08	9962.18	2.5		0	2021-06-11	0.623634		1	0.00560473	0.00684714	0.000662768	0.000662768	0.6	1	0.376366	1.04886	227500	0.0204325	2.5	0.984771	0.998834	0.940915	0.000662768	0.000673656	0.000663592	00:00:00	741050	2022-11-10
2021-06-12	1.41455e+07	0			0.4	61352.9	152812	2.12182e+08	9786.18	2.5		0	2021-06-12	0.624066		1	0.00549204	0.00674172	0.000661559	0.000661559	0.6	1	0.375934	1.04886	227800	0.0203917	2.5	0.984771	0.998853	0.939836	0.000661559	0.000671963	0.000662375	00:00:00	741564	2022-11-10
2021-06-13	1.41551e+07	0			0.4	60299.5	150407	2.12327e+08	9610.28	2.5		0	2021-06-13	0.62449		1	0.00537987	0.00663561	0.000660353	0.000660353	0.6	1	0.37551	1.04886	228100	0.0203509	2.5	0.984771	0.998872	0.938776	0.000660353	0.000670275	0.00066116	00:00:00	742068	2022-11-10
2021-06-14	1.41645e+07	0			0.4	59245.1	147989	2.12468e+08	9434.62	2.5		0	2021-06-14	0.624906		1	0.0052683	0.00652893	0.000659149	0.000659149	0.6	1	0.375094	1.04886	228400	0.0203102	2.5	0.984771	0.998892	0.937735	0.000659149	0.000668591	0.000659948	00:00:00	742563	2022-11-10
2021-06-15	1.41738e+07	0			0.4	58190.7	145560	2.12607e+08	9259.37	2.5		0	2021-06-15	0.625314		1	0.00515741	0.00642179	0.000657948	0.000657948	0.6	1	0.374686	1.04886	228700	0.0202696	2.5	0.984771	0.998911	0.936714	0.000657948	0.000666913	0.000658739	00:00:00	743049	2022-11-10
2021-06-16	1.41829e+07	0			0.4	57137.3	143124	2.12743e+08	9084.68	2.5		0	2021-06-16	0.625715		1	0.0050473	0.0063143	0.000656749	0.000656749	0.6	1	0.374285	1.04886	229000	0.020229	2.5	0.984771	0.99893	0.935712	0.000656749	0.000665239	0.000657532	00:00:00	743526	2022-11-10
2021-06-17	1.41918e+07	0			0.4	56085.8	140682	2.12877e+08	8910.68	2.5		0	2021-06-17	0.626108		1	0.00493803	0.00620658	0.000655554	0.000655554	0.6	1	0.373892	1.04886	229300	0.0201886	2.5	0.984771	0.99895	0.934729	0.000655554	0.000663571	0.000656328	00:00:00	743994	2022-11-10
2021-06-18	1.42005e+07	0			0.4	55037.1	138238	2.13008e+08	8737.5	2.5		0	2021-06-18	0.626494		1	0.00482969	0.00609873	0.00065436	0.00065436	0.6	1	0.373506	1.04886	229600	0.0201482	2.5	0.984771	0.998969	0.933765	0.00065436	0.000661907	0.000655127	00:00:00	744453	2022-11-10
2021-06-19	1.42091e+07	0			0.4	53992.1	135793	2.13136e+08	8565.29	2.5		0	2021-06-19	0.626872		1	0.00472235	0.00599086	0.00065317	0.00065317	0.6	1	0.373128	1.04886	229900	0.0201079	2.5	0.984771	0.998988	0.932821	0.00065317	0.000660247	0.000653928	00:00:00	744903	2022-11-10
2021-06-20	1.42175e+07	0			0.4	52951.7	133350	2.13262e+08	8394.16	2.5		0	2021-06-20	0.627242		1	0.00461606	0.00588307	0.000651982	0.000651982	0.6	1	0.372758	1.04886	230200	0.0200677	2.5	0.984771	0.999007	0.931895	0.000651982	0.000658593	0.000652732	00:00:00	745343	2022-11-10
2021-06-21	1.42257e+07	0			0.4	51916.5	130910	2.13386e+08	8224.23	2.5		0	2021-06-21	0.627605		1	0.00451089	0.00577544	0.000650797	0.000650797	0.6	1	0.372395	1.04886	230500	0.0200275	2.5	0.984771	0.999027	0.930988	0.000650797	0.000656943	0.000651539	00:00:00	745775	2022-11-10
2021-06-22	1.42338e+07	0			0.4	50887.5	128477	2.13507e+08	8055.61	2.5		0	2021-06-22	0.62796		1	0.0044069	0.00566809	0.000649614	0.000649614	0.6	1	0.37204	1.04886	230800	0.0199875	2.5	0.984771	0.999046	0.930099	0.000649614	0.000655298	0.000650348	00:00:00	746198	2022-11-10
2021-06-23	1.42417e+07	0			0.4	49865.2	126051	2.13625e+08	7888.4	2.5		0	2021-06-23	0.628308		1	0.00430414	0.00556109	0.000648433	0.000648433	0.6	1	0.371692	1.04886	231100	0.0199475	2.5	0.984771	0.999065	0.929229	0.000648433	0.000653658	0.00064916	00:00:00	746612	2022-11-10
2021-06-24	1.42494e+07	0			0.4	48850.4	123636	2.13741e+08	7722.7	2.5		0	2021-06-24	0.628649		1	0.00420266	0.00545452	0.000647256	0.000647256	0.6	1	0.371351	1.04886	231400	0.0199076	2.5	0.984771	0.999083	0.928377	0.000647256	0.000652022	0.000647974	00:00:00	747018	2022-11-10
2021-06-25	1.42569e+07	0			0.4	47843.7	121232	2.13854e+08	7558.6	2.5		0	2021-06-25	0.628983		1	0.0041025	0.00534848	0.000646081	0.000646081	0.6	1	0.371017	1.04886	231700	0.0198678	2.5	0.984771	0.999102	0.927544	0.000646081	0.000650391	0.000646791	00:00:00	747414	2022-11-10
2021-06-26	1.42643e+07	0			0.4	46845.7	118842	2.13965e+08	7396.19	2.5		0	2021-06-26	0.629309		1	0.00400371	0.00524304	0.000644908	0.000644908	0.6	1	0.370691	1.04886	232000	0.0198281	2.5	0.984771	0.999121	0.926728	0.000644908	0.000648765	0.000645611	00:00:00	747803	2022-11-10
2021-06-27	1.42716e+07	0			0.4	45857	116468	2.14074e+08	7235.54	2.5		0	2021-06-27	0.629628		1	0.00390632	0.00513828	0.000643738	0.000643738	0.6	1	0.370372	1.04886	232300	0.0197884	2.5	0.984771	0.999139	0.92593	0.000643738	0.000647143	0.000644433	00:00:00	748183	2022-11-10
2021-06-28	1.42786e+07	0			0.4	44878.2	114110	2.1418e+08	7076.74	2.5		0	2021-06-28	0.62994		1	0.00381037	0.00503425	0.000642571	0.000642571	0.6	1	0.37006	1.04886	232600	0.0197488	2.5	0.984771	0.999157	0.925149	0.000642571	0.000645526	0.000643258	00:00:00	748554	2022-11-10
2021-06-29	1.42856e+07	0			0.4	43909.6	111770	2.14283e+08	6919.84	2.5		0	2021-06-29	0.630246		1	0.00371588	0.00493104	0.000641406	0.000641406	0.6	1	0.369754	1.04886	232900	0.0197093	2.5	0.984771	0.999175	0.924386	0.000641406	0.000643914	0.000642085	00:00:00	748917	2022-11-10
2021-06-30	1.42923e+07	0			0.4	42951.8	109450	2.14385e+08	6764.91	2.5		0	2021-06-30	0.630544		1	0.00362289	0.00482869	0.000640244	0.000640244	0.6	1	0.369456	1.04886	233200	0.0196699	2.5	0.984771	0.999193	0.92364	0.000640244	0.000642306	0.000640915	00:00:00	749273	2022-11-10
2021-07-01	1.42989e+07	0			0.4	42005.2	107152	2.14484e+08	6612	2.5		0	2021-07-01	0.630836		1	0.00353142	0.00472728	0.000639084	0.000639084	0.6	1	0.369164	1.04886	233500	0.0196306	2.5	0.984771	0.99921	0.922911	0.000639084	0.000640702	0.000639747	00:00:00	749620	2022-11-10
2021-07-02	1.43054e+07	0			0.4	41070.2	104875	2.14581e+08	6461.18	2.5		0	2021-07-02	0.631121		1	0.00344148	0.00462686	0.000637926	0.000637926	0.6	1	0.368879	1.04886	233800	0.0195913	2.5	0.984771	0.999228	0.922198	0.000637926	0.000639104	0.000638582	00:00:00	749959	2022-11-10
2021-07-03	1.43117e+07	0			0.4	40147.1	102623	2.14676e+08	6312.48	2.5		0	2021-07-03	0.631399		1	0.0033531	0.00452747	0.000636772	0.000636772	0.6	1	0.368601	1.04886	234100	0.0195521	2.5	0.984771	0.999245	0.921502	0.000636772	0.00063751	0.00063742	00:00:00	750290	2022-11-10
2021-07-04	1.43179e+07	0			0.4	39236.3	100394	2.14768e+08	6165.94	2.5		0	2021-07-04	0.631671		1	0.00326629	0.00442916	0.000635619	0.000635619	0.6	1	0.368329	1.04886	234400	0.019513	2.5	0.984771	0.999262	0.920822	0.000635619	0.00063592	0.00063626	00:00:00	750614	2022-11-10
2021-07-05	1.43239e+07	0			0.4	38338.1	98191.7	2.14859e+08	6021.61	2.5		0	2021-07-05	0.631937		1	0.00318107	0.00433199	0.000634469	0.000634469	0.6	1	0.368063	1.04886	234700	0.019474	2.5	0.984771	0.999279	0.920158	0.000634469	0.000634335	0.000635103	00:00:00	750930	2022-11-10
2021-07-06	1.43298e+07	0			0.4	37452.7	96015.6	2.14947e+08	5879.52	2.5		0	2021-07-06	0.632196		1	0.00309743	0.00423598	0.000633322	0.000633322	0.6	1	0.367804	1.04886	235000	0.019435	2.5	0.984771	0.999295	0.919509	0.000633322	0.000632754	0.000633948	00:00:00	751239	2022-11-10
2021-07-07	1.43355e+07	0			0.4	36580.4	93866.9	2.15033e+08	5739.69	2.5		0	2021-07-07	0.63245		1	0.00301539	0.00414119	0.000632177	0.000632177	0.6	1	0.36755	1.04886	235300	0.0193962	2.5	0.984771	0.999312	0.918876	0.000632177	0.000631178	0.000632795	00:00:00	751540	2022-11-10
2021-07-08	1.43411e+07	0			0.4	35721.4	91746.4	2.15117e+08	5602.15	2.5		0	2021-07-08	0.632697		1	0.00293494	0.00404763	0.000631035	0.000631035	0.6	1	0.367303	1.04886	235600	0.0193574	2.5	0.984771	0.999328	0.918258	0.000631035	0.000629606	0.000631645	00:00:00	751834	2022-11-10
2021-07-09	1.43466e+07	0			0.4	34875.8	89654.7	2.15199e+08	5466.91	2.5		0	2021-07-09	0.632938		1	0.0028561	0.00395535	0.000629895	0.000629895	0.6	1	0.367062	1.04886	235900	0.0193187	2.5	0.984771	0.999343	0.917655	0.000629895	0.000628039	0.000630498	00:00:00	752121	2022-11-10
2021-07-10	1.43519e+07	0			0.4	34043.9	87592.5	2.15279e+08	5334	2.5		0	2021-07-10	0.633173		1	0.00277886	0.00386437	0.000628758	0.000628758	0.6	1	0.366827	1.04886	236200	0.01928	2.5	0.984771	0.999359	0.917067	0.000628758	0.000626476	0.000629353	00:00:00	752401	2022-11-10
2021-07-11	1.43571e+07	0			0.4	33225.7	85560.4	2.15357e+08	5203.42	2.5		0	2021-07-11	0.633403		1	0.00270322	0.00377472	0.000627623	0.000627623	0.6	1	0.366597	1.04886	236500	0.0192415	2.5	0.984771	0.999374	0.916493	0.000627623	0.000624918	0.000628211	00:00:00	752675	2022-11-10
2021-07-12	1.43622e+07	0			0.4	32421.3	83558.8	2.15433e+08	5075.19	2.5		0	2021-07-12	0.633627		1	0.00262917	0.00368642	0.00062649	0.00062649	0.6	1	0.366373	1.04886	236800	0.019203	2.5	0.984771	0.999389	0.915933	0.00062649	0.000623364	0.000627071	00:00:00	752941	2022-11-10
2021-07-13	1.43672e+07	0			0.4	31631	81588.3	2.15507e+08	4949.3	2.5		0	2021-07-13	0.633845		1	0.0025567	0.00359948	0.00062536	0.00062536	0.6	1	0.366155	1.04886	237100	0.0191646	2.5	0.984771	0.999404	0.915387	0.00062536	0.000621814	0.000625933	00:00:00	753201	2022-11-10
2021-07-14	1.4372e+07	0			0.4	30854.6	79649.1	2.1558e+08	4825.76	2.5		0	2021-07-14	0.634058		1	0.00248581	0.00351393	0.000624232	0.000624232	0.6	1	0.365942	1.04886	237400	0.0191262	2.5	0.984771	0.999419	0.914855	0.000624232	0.000620269	0.000624798	00:00:00	753454	2022-11-10
2021-07-15	1.43767e+07	0			0.4	30092.2	77741.7	2.1565e+08	4704.58	2.5		0	2021-07-15	0.634265		1	0.00241649	0.00342978	0.000623107	0.000623107	0.6	1	0.365735	1.04886	237700	0.019088	2.5	0.984771	0.999433	0.914336	0.000623107	0.000618728	0.000623665	00:00:00	753701	2022-11-10
2021-07-16	1.43813e+07	0			0.4	29344	75866.3	2.15719e+08	4585.74	2.5		0	2021-07-16	0.634468		1	0.00234873	0.00334704	0.000621984	0.000621984	0.6	1	0.365532	1.04886	238000	0.0190498	2.5	0.984771	0.999447	0.913831	0.000621984	0.000617192	0.000622535	00:00:00	753942	2022-11-10
2021-07-17	1.43857e+07	0			0.4	28609.8	74023	2.15786e+08	4469.24	2.5		0	2021-07-17	0.634665		1	0.00228251	0.00326572	0.000620864	0.000620864	0.6	1	0.365335	1.04886	238300	0.0190117	2.5	0.984771	0.999461	0.913338	0.000620864	0.00061566	0.000621408	00:00:00	754177	2022-11-10
2021-07-18	1.43901e+07	0			0.4	27889.7	72212.2	2.15851e+08	4355.07	2.5		0	2021-07-18	0.634857		1	0.00221781	0.00318583	0.000619746	0.000619746	0.6	1	0.365143	1.04886	238600	0.0189737	2.5	0.984771	0.999474	0.912857	0.000619746	0.000614132	0.000620282	00:00:00	754405	2022-11-10
2021-07-19	1.43943e+07	0			0.4	27183.6	70433.8	2.15915e+08	4243.22	2.5		0	2021-07-19	0.635044		1	0.00215463	0.00310737	0.00061863	0.00061863	0.6	1	0.364956	1.04886	238900	0.0189358	2.5	0.984771	0.999487	0.912389	0.00061863	0.000612608	0.000619159	00:00:00	754628	2022-11-10
2021-07-20	1.43985e+07	0			0.4	26491.5	68687.9	2.15977e+08	4133.67	2.5		0	2021-07-20	0.635227		1	0.00209295	0.00303035	0.000617517	0.000617517	0.6	1	0.364773	1.04886	239200	0.0188979	2.5	0.984771	0.9995	0.911933	0.000617517	0.000611089	0.000618039	00:00:00	754845	2022-11-10
2021-07-21	1.44025e+07	0			0.4	25813.4	66974.7	2.16037e+08	4026.42	2.5		0	2021-07-21	0.635404		1	0.00203274	0.00295476	0.000616406	0.000616406	0.6	1	0.364596	1.04886	239500	0.0188601	2.5	0.984771	0.999513	0.911489	0.000616406	0.000609574	0.000616921	00:00:00	755056	2022-11-10
2021-07-22	1.44064e+07	0			0.4	25149	65293.9	2.16096e+08	3921.43	2.5		0	2021-07-22	0.635577		1	0.001974	0.00288061	0.000615298	0.000615298	0.6	1	0.364423	1.04886	239800	0.0188224	2.5	0.984771	0.999525	0.911057	0.000615298	0.000608063	0.000615805	00:00:00	755262	2022-11-10
2021-07-23	1.44102e+07	0			0.4	24498.5	63645.7	2.16154e+08	3818.7	2.5		0	2021-07-23	0.635746		1	0.00191669	0.0028079	0.000614191	0.000614191	0.6	1	0.364254	1.04886	240100	0.0187847	2.5	0.984771	0.999538	0.910636	0.000614191	0.000606557	0.000614692	00:00:00	755463	2022-11-10
2021-07-24	1.4414e+07	0			0.4	23861.6	62029.9	2.16209e+08	3718.2	2.5		0	2021-07-24	0.63591		1	0.00186081	0.00273661	0.000613088	0.000613088	0.6	1	0.36409	1.04886	240400	0.0187471	2.5	0.984771	0.99955	0.910226	0.000613088	0.000605054	0.000613581	00:00:00	755658	2022-11-10
2021-07-25	1.44176e+07	0			0.4	23238.3	60446.4	2.16264e+08	3619.91	2.5		0	2021-07-25	0.63607		1	0.00180632	0.00266675	0.000611986	0.000611986	0.6	1	0.36393	1.04886	240700	0.0187097	2.5	0.984771	0.999561	0.909826	0.000611986	0.000603556	0.000612473	00:00:00	755848	2022-11-10
2021-07-26	1.44211e+07	0			0.4	22628.5	58895	2.16316e+08	3523.81	2.5		0	2021-07-26	0.636225		1	0.00175321	0.00259831	0.000610887	0.000610887	0.6	1	0.363775	1.04886	241000	0.0186722	2.5	0.984771	0.999573	0.909438	0.000610887	0.000602062	0.000611367	00:00:00	756033	2022-11-10
2021-07-27	1.44245e+07	0			0.4	22031.9	57375.6	2.16368e+08	3429.86	2.5		0	2021-07-27	0.636376		1	0.00170146	0.00253128	0.000609791	0.000609791	0.6	1	0.363624	1.04886	241300	0.0186349	2.5	0.984771	0.999584	0.909059	0.000609791	0.000600573	0.000610263	00:00:00	756213	2022-11-10
2021-07-28	1.44279e+07	0			0.4	21448.5	55887.9	2.16418e+08	3338.05	2.5		0	2021-07-28	0.636524		1	0.00165104	0.00246564	0.000608696	0.000608696	0.6	1	0.363476	1.04886	241600	0.0185976	2.5	0.984771	0.999595	0.908691	0.000608696	0.000599087	0.000609162	00:00:00	756388	2022-11-10
2021-07-29	1.44311e+07	0			0.4	20878.2	54431.7	2.16467e+08	3248.35	2.5		0	2021-07-29	0.636667		1	0.00160194	0.0024014	0.000607604	0.000607604	0.6	1	0.363333	1.04886	241900	0.0185604	2.5	0.984771	0.999606	0.908333	0.000607604	0.000597606	0.000608063	00:00:00	756559	2022-11-10
2021-07-30	1.44343e+07	0			0.4	20320.7	53006.7	2.16514e+08	3160.72	2.5		0	2021-07-30	0.636806		1	0.00155412	0.00233853	0.000606515	0.000606515	0.6	1	0.363194	1.04886	242200	0.0185233	2.5	0.984771	0.999616	0.907984	0.000606515	0.000596128	0.000606966	00:00:00	756725	2022-11-10
2021-07-31	1.44374e+07	0			0.4	19775.9	51612.6	2.1656e+08	3075.15	2.5		0	2021-07-31	0.636942		1	0.00150756	0.00227703	0.000605427	0.000605427	0.6	1	0.363058	1.04886	242500	0.0184863	2.5	0.984771	0.999626	0.907645	0.000605427	0.000594655	0.000605872	00:00:00	756886	2022-11-10
2021-08-01	1.44403e+07	0			0.4	19243.7	50249.1	2.16605e+08	2991.59	2.5		0	2021-08-01	0.637074		1	0.00146224	0.00221687	0.000604342	0.000604342	0.6	1	0.362926	1.04886	242800	0.0184493	2.5	0.984771	0.999636	0.907315	0.000604342	0.000593186	0.00060478	00:00:00	757043	2022-11-10
2021-08-02	1.44433e+07	0			0.4	18723.9	48915.9	2.16649e+08	2910.02	2.5		0	2021-08-02	0.637202		1	0.00141815	0.00215805	0.00060326	0.00060326	0.6	1	0.362798	1.04886	243100	0.0184124	2.5	0.984771	0.999646	0.906994	0.00060326	0.000591721	0.000603691	00:00:00	757196	2022-11-10
2021-08-03	1.44461e+07	0			0.4	18216.2	47612.6	2.16691e+08	2830.41	2.5		0	2021-08-03	0.637327		1	0.00137524	0.00210056	0.000602179	0.000602179	0.6	1	0.362673	1.04886	243400	0.0183756	2.5	0.984771	0.999656	0.906682	0.000602179	0.000590261	0.000602603	00:00:00	757345	2022-11-10
2021-08-04	1.44488e+07	0			0.4	17720.6	46338.9	2.16733e+08	2752.72	2.5		0	2021-08-04	0.637449		1	0.0013335	0.00204436	0.000601101	0.000601101	0.6	1	0.362551	1.04886	243700	0.0183388	2.5	0.984771	0.999665	0.906378	0.000601101	0.000588804	0.000601519	00:00:00	757489	2022-11-10
2021-08-05	1.44515e+07	0			0.4	17236.8	45094.4	2.16773e+08	2676.93	2.5		0	2021-08-05	0.637567		1	0.00129291	0.00198946	0.000600025	0.000600025	0.6	1	0.362433	1.04886	244000	0.0183021	2.5	0.984771	0.999674	0.906083	0.000600025	0.000587351	0.000600436	00:00:00	757630	2022-11-10
2021-08-06	1.44541e+07	0			0.4	16764.7	43878.7	2.16812e+08	2603	2.5		0	2021-08-06	0.637682		1	0.00125344	0.00193583	0.000598952	0.000598952	0.6	1	0.362318	1.04886	244300	0.0182655	2.5	0.984771	0.999683	0.905796	0.000598952	0.000585903	0.000599356	00:00:00	757766	2022-11-10
2021-08-07	1.44566e+07	0			0.4	16304	42691.4	2.1685e+08	2530.9	2.5		0	2021-08-07	0.637793		1	0.00121507	0.00188345	0.000597881	0.000597881	0.6	1	0.362207	1.04886	244600	0.018229	2.5	0.984771	0.999692	0.905517	0.000597881	0.000584458	0.000598278	00:00:00	757899	2022-11-10
2021-08-08	1.44591e+07	0			0.4	15854.5	41532.1	2.16887e+08	2460.59	2.5		0	2021-08-08	0.637902		1	0.00117776	0.0018323	0.000596812	0.000596812	0.6	1	0.362098	1.04886	244900	0.0181925	2.5	0.984771	0.9997	0.905246	0.000596812	0.000583017	0.000597202	00:00:00	758028	2022-11-10
2021-08-09	1.44615e+07	0			0.4	15416.2	40400.3	2.16922e+08	2392.04	2.5		0	2021-08-09	0.638007		1	0.00114151	0.00178237	0.000595745	0.000595745	0.6	1	0.361993	1.04886	245200	0.0181562	2.5	0.984771	0.999709	0.904982	0.000595745	0.000581581	0.000596129	00:00:00	758154	2022-11-10
2021-08-10	1.44638e+07	0			0.4	14988.7	39295.7	2.16957e+08	2325.23	2.5		0	2021-08-10	0.63811		1	0.00110628	0.00173363	0.00059468	0.00059468	0.6	1	0.36189	1.04886	245500	0.0181198	2.5	0.984771	0.999717	0.904725	0.00059468	0.000580148	0.000595057	00:00:00	758276	2022-11-10
2021-08-11	1.44661e+07	0			0.4	14571.9	38217.8	2.16991e+08	2260.11	2.5		0	2021-08-11	0.63821		1	0.00107206	0.00168608	0.000593618	0.000593618	0.6	1	0.36179	1.04886	245800	0.0180836	2.5	0.984771	0.999724	0.904476	0.000593618	0.00057872	0.000593989	00:00:00	758395	2022-11-10
2021-08-12	1.44683e+07	0			0.4	14165.5	37166.1	2.17024e+08	2196.65	2.5		0	2021-08-12	0.638307		1	0.00103881	0.00163968	0.000592558	0.000592558	0.6	1	0.361693	1.04886	246100	0.0180474	2.5	0.984771	0.999732	0.904234	0.000592558	0.000577295	0.000592922	00:00:00	758510	2022-11-10
2021-08-13	1.44704e+07	0			0.4	13769.4	36140.2	2.17056e+08	2134.82	2.5		0	2021-08-13	0.638401		1	0.00100652	0.00159442	0.000591501	0.000591501	0.6	1	0.361599	1.04886	246400	0.0180113	2.5	0.984771	0.99974	0.903998	0.000591501	0.000575874	0.000591858	00:00:00	758622	2022-11-10
2021-08-14	1.44725e+07	0			0.4	13383.4	35139.6	2.17087e+08	2074.59	2.5		0	2021-08-14	0.638492		1	0.000975158	0.00155028	0.000590445	0.000590445	0.6	1	0.361508	1.04886	246700	0.0179753	2.5	0.984771	0.999747	0.903769	0.000590445	0.000574458	0.000590796	00:00:00	758731	2022-11-10
2021-08-15	1.44745e+07	0			0.4	13007.3	34163.9	2.17118e+08	2015.92	2.5		0	2021-08-15	0.638581		1	0.000944709	0.00150723	0.000589392	0.000589392	0.6	1	0.361419	1.04886	247000	0.0179394	2.5	0.984771	0.999754	0.903547	0.000589392	0.000573045	0.000589736	00:00:00	758837	2022-11-10
2021-08-16	1.44765e+07	0			0.4	12640.9	33212.7	2.17147e+08	1958.79	2.5		0	2021-08-16	0.638668		1	0.000915147	0.00146527	0.000588341	0.000588341	0.6	1	0.361332	1.04886	247300	0.0179035	2.5	0.984771	0.999761	0.903331	0.000588341	0.000571636	0.000588678	00:00:00	758940	2022-11-10
2021-08-17	1.44784e+07	0			0.4	12283.9	32285.4	2.17176e+08	1903.15	2.5		0	2021-08-17	0.638752		1	0.000886451	0.00142436	0.000587292	0.000587292	0.6	1	0.361248	1.04886	247600	0.0178677	2.5	0.984771	0.999768	0.903121	0.000587292	0.000570231	0.000587623	00:00:00	759040	2022-11-10
2021-08-18	1.44802e+07	0			0.4	11936.3	31381.7	2.17203e+08	1848.98	2.5		0	2021-08-18	0.638833		1	0.000858599	0.00138449	0.000586245	0.000586245	0.6	1	0.361167	1.04886	247900	0.0178319	2.5	0.984771	0.999774	0.902917	0.000586245	0.00056883	0.00058657	00:00:00	759137	2022-11-10
2021-08-19	1.4482e+07	0			0.4	11597.7	30501	2.1723e+08	1796.24	2.5		0	2021-08-19	0.638912		1	0.000831569	0.00134563	0.000585201	0.000585201	0.6	1	0.361088	1.04886	248200	0.0177963	2.5	0.984771	0.999781	0.902719	0.000585201	0.000567432	0.000585519	00:00:00	759231	2022-11-10
2021-08-20	1.44838e+07	0			0.4	11268	29642.9	2.17256e+08	1744.91	2.5		0	2021-08-20	0.638989		1	0.000805341	0.00130778	0.000584159	0.000584159	0.6	1	0.361011	1.04886	248500	0.0177607	2.5	0.984771	0.999787	0.902527	0.000584159	0.000566039	0.000584471	00:00:00	759323	2022-11-10
2021-08-21	1.44855e+07	0			0.4	10947	28807	2.17282e+08	1694.94	2.5		0	2021-08-21	0.639064		1	0.000779894	0.0012709	0.000583119	0.000583119	0.6	1	0.360936	1.04886	248800	0.0177252	2.5	0.984771	0.999793	0.90234	0.000583119	0.000564649	0.000583424	00:00:00	759412	2022-11-10
2021-08-22	1.44871e+07	0			0.4	10634.5	27992.7	2.17307e+08	1646.32	2.5		0	2021-08-22	0.639137		1	0.000755207	0.00123497	0.000582081	0.000582081	0.6	1	0.360863	1.04886	249100	0.0176897	2.5	0.984771	0.999799	0.902158	0.000582081	0.000563264	0.00058238	00:00:00	759498	2022-11-10
2021-08-23	1.44887e+07	0			0.4	10330.4	27199.6	2.1733e+08	1599.01	2.5		0	2021-08-23	0.639207		1	0.00073126	0.00119998	0.000581045	0.000581045	0.6	1	0.360793	1.04886	249400	0.0176543	2.5	0.984771	0.999805	0.901982	0.000581045	0.000561882	0.000581338	00:00:00	759582	2022-11-10
2021-08-24	1.44903e+07	0			0.4	10034.4	26427.4	2.17354e+08	1552.97	2.5		0	2021-08-24	0.639276		1	0.000708034	0.00116591	0.000580012	0.000580012	0.6	1	0.360724	1.04886	249700	0.017619	2.5	0.984771	0.99981	0.90181	0.000580012	0.000560504	0.000580298	00:00:00	759663	2022-11-10
2021-08-25	1.44918e+07	0			0.4	9746.33	25675.5	2.17376e+08	1508.19	2.5		0	2021-08-25	0.639342		1	0.00068551	0.00113274	0.000578981	0.000578981	0.6	1	0.360658	1.04886	250000	0.0175838	2.5	0.984771	0.999816	0.901644	0.000578981	0.000559129	0.000579261	00:00:00	759743	2022-11-10
2021-08-26	1.44932e+07	0			0.4	9466.05	24943.4	2.17398e+08	1464.62	2.5		0	2021-08-26	0.639407		1	0.000663668	0.00110045	0.000577951	0.000577951	0.6	1	0.360593	1.04886	250300	0.0175486	2.5	0.984771	0.999821	0.901483	0.000577951	0.000557759	0.000578225	00:00:00	759820	2022-11-10
2021-08-27	1.44946e+07	0			0.4	9193.35	24230.9	2.1742e+08	1422.25	2.5		0	2021-08-27	0.63947		1	0.00064249	0.00106901	0.000576925	0.000576925	0.6	1	0.36053	1.04886	250600	0.0175135	2.5	0.984771	0.999826	0.901326	0.000576925	0.000556392	0.000577192	00:00:00	759894	2022-11-10
2021-08-28	1.4496e+07	0			0.4	8928.06	23537.3	2.1744e+08	1381.03	2.5		0	2021-08-28	0.639531		1	0.000621957	0.00103841	0.0005759	0.0005759	0.6	1	0.360469	1.04886	250900	0.0174785	2.5	0.984771	0.999831	0.901173	0.0005759	0.000555029	0.000576161	00:00:00	759967	2022-11-10
2021-08-29	1.44974e+07	0			0.4	8670.01	22862.3	2.17461e+08	1340.96	2.5		0	2021-08-29	0.63959		1	0.000602053	0.00100863	0.000574877	0.000574877	0.6	1	0.36041	1.04886	251200	0.0174435	2.5	0.984771	0.999836	0.901025	0.000574877	0.00055367	0.000575132	00:00:00	760037	2022-11-10
2021-08-30	1.44987e+07	0			0.4	8419.02	22205.5	2.1748e+08	1301.98	2.5		0	2021-08-30	0.639647		1	0.000582759	0.000979656	0.000573857	0.000573857	0.6	1	0.360353	1.04886	251500	0.0174087	2.5	0.984771	0.999841	0.900882	0.000573857	0.000552314	0.000574106	00:00:00	760105	2022-11-10
2021-08-31	1.44999e+07	0			0.4	8174.93	21566.5	2.17499e+08	1264.09	2.5		0	2021-08-31	0.639703		1	0.000564058	0.000951462	0.000572838	0.000572838	0.6	1	0.360297	1.04886	251800	0.0173738	2.5	0.984771	0.999845	0.900742	0.000572838	0.000550962	0.000573081	00:00:00	760172	2022-11-10
2021-09-01	1.45012e+07	0			0.4	7937.56	20944.8	2.17517e+08	1227.25	2.5		0	2021-09-01	0.639757		1	0.000545934	0.000924033	0.000571822	0.000571822	0.6	1	0.360243	1.04886	252100	0.0173391	2.5	0.984771	0.99985	0.900607	0.000571822	0.000549614	0.000572059	00:00:00	760236	2022-11-10
2021-09-02	1.45024e+07	0			0.4	7706.75	20339.9	2.17535e+08	1191.44	2.5		0	2021-09-02	0.63981		1	0.000528371	0.000897351	0.000570808	0.000570808	0.6	1	0.36019	1.04886	252400	0.0173044	2.5	0.984771	0.999854	0.900476	0.000570808	0.00054827	0.000571038	00:00:00	760299	2022-11-10
2021-09-03	1.45035e+07	0			0.4	7482.34	19751.7	2.17553e+08	1156.62	2.5		0	2021-09-03	0.639861		1	0.000511352	0.000871397	0.000569796	0.000569796	0.6	1	0.360139	1.04886	252700	0.0172698	2.5	0.984771	0.999858	0.900348	0.000569796	0.000546929	0.00057002	00:00:00	760360	2022-11-10
2021-09-04	1.45046e+07	0			0.4	7264.17	19179.5	2.17569e+08	1122.79	2.5		0	2021-09-04	0.63991		1	0.000494861	0.000846155	0.000568786	0.000568786	0.6	1	0.36009	1.04886	253000	0.0172353	2.5	0.984771	0.999862	0.900224	0.000568786	0.000545592	0.000569004	00:00:00	760418	2022-11-10
2021-09-05	1.45057e+07	0			0.4	7052.09	18623.1	2.17586e+08	1089.9	2.5		0	2021-09-05	0.639958		1	0.000478885	0.000821607	0.000567778	0.000567778	0.6	1	0.360042	1.04886	253300	0.0172008	2.5	0.984771	0.999866	0.900104	0.000567778	0.000544259	0.00056799	00:00:00	760476	2022-11-10
2021-09-06	1.45068e+07	0			0.4	6845.93	18082	2.17602e+08	1057.94	2.5		0	2021-09-06	0.640005		1	0.000463407	0.000797736	0.000566772	0.000566772	0.6	1	0.359995	1.04886	253600	0.0171664	2.5	0.984771	0.99987	0.899987	0.000566772	0.000542929	0.000566979	00:00:00	760531	2022-11-10
2021-09-07	1.45078e+07	0			0.4	6645.55	17555.9	2.17617e+08	1026.88	2.5		0	2021-09-07	0.64005		1	0.000448413	0.000774526	0.000565769	0.000565769	0.6	1	0.35995	1.04886	253900	0.0171321	2.5	0.984771	0.999874	0.899874	0.000565769	0.000541603	0.000565969	00:00:00	760585	2022-11-10
2021-09-08	1.45088e+07	0			0.4	6450.81	17044.4	2.17632e+08	996.694	2.5		0	2021-09-08	0.640094		1	0.000433889	0.00075196	0.000564767	0.000564767	0.6	1	0.359906	1.04886	254200	0.0170978	2.5	0.984771	0.999878	0.899764	0.000564767	0.000540281	0.000564962	00:00:00	760637	2022-11-10
2021-09-09	1.45098e+07	0			0.4	6261.55	16547.2	2.17647e+08	967.368	2.5		0	2021-09-09	0.640137		1	0.000419822	0.000730022	0.000563768	0.000563768	0.6	1	0.359863	1.04886	254500	0.0170636	2.5	0.984771	0.999881	0.899657	0.000563768	0.000538962	0.000563956	00:00:00	760688	2022-11-10
2021-09-10	1.45107e+07	0			0.4	6077.64	16063.8	2.17661e+08	938.876	2.5		0	2021-09-10	0.640178		1	0.000406197	0.000708697	0.000562771	0.000562771	0.6	1	0.359822	1.04886	254800	0.0170295	2.5	0.984771	0.999885	0.899554	0.000562771	0.000537646	0.000562953	00:00:00	760738	2022-11-10
2021-09-11	1.45116e+07	0			0.4	5898.94	15594	2.17674e+08	911.195	2.5		0	2021-09-11	0.640219		1	0.000393003	0.000687969	0.000561775	0.000561775	0.6	1	0.359781	1.04886	255100	0.0169954	2.5	0.984771	0.999888	0.899453	0.000561775	0.000536335	0.000561952	00:00:00	760785	2022-11-10
2021-09-12	1.45125e+07	0			0.4	5725.31	15137.3	2.17688e+08	884.304	2.5		0	2021-09-12	0.640258		1	0.000380225	0.000667823	0.000560782	0.000560782	0.6	1	0.359742	1.04886	255400	0.0169614	2.5	0.984771	0.999892	0.899356	0.000560782	0.000535027	0.000560953	00:00:00	760832	2022-11-10
2021-09-13	1.45134e+07	0			0.4	5556.62	14693.5	2.177e+08	858.182	2.5		0	2021-09-13	0.640295		1	0.000367852	0.000648243	0.000559791	0.000559791	0.6	1	0.359705	1.04886	255700	0.0169275	2.5	0.984771	0.999895	0.899261	0.000559791	0.000533722	0.000559956	00:00:00	760877	2022-11-10
2021-09-14	1.45142e+07	0			0.4	5392.73	14262.2	2.17713e+08	832.809	2.5		0	2021-09-14	0.640332		1	0.000355871	0.000629216	0.000558802	0.000558802	0.6	1	0.359668	1.04886	256000	0.0168936	2.5	0.984771	0.999898	0.899169	0.000558802	0.000532421	0.000558961	00:00:00	760921	2022-11-10
2021-09-15	1.4515e+07	0			0.4	5233.53	13843.1	2.17725e+08	808.163	2.5		0	2021-09-15	0.640368		1	0.000344271	0.000610727	0.000557815	0.000557815	0.6	1	0.359632	1.04886	256300	0.0168599	2.5	0.984771	0.999901	0.89908	0.000557815	0.000531124	0.000557968	00:00:00	760963	2022-11-10
2021-09-16	1.45158e+07	0			0.4	5078.88	13435.9	2.17737e+08	784.227	2.5		0	2021-09-16	0.640402		1	0.00033304	0.000592762	0.00055683	0.00055683	0.6	1	0.359598	1.04886	256600	0.0168261	2.5	0.984771	0.999904	0.898994	0.00055683	0.00052983	0.000556977	00:00:00	761004	2022-11-10
2021-09-17	1.45166e+07	0			0.4	4928.67	13040.3	2.17748e+08	760.98	2.5		0	2021-09-17	0.640436		1	0.000322166	0.000575307	0.000555847	0.000555847	0.6	1	0.359564	1.04886	256900	0.0167925	2.5	0.984771	0.999907	0.89891	0.000555847	0.000528539	0.000555989	00:00:00	761044	2022-11-10
2021-09-18	1.45173e+07	0			0.4	4782.77	12655.9	2.17759e+08	738.404	2.5		0	2021-09-18	0.640469		1	0.00031164	0.000558349	0.000554866	0.000554866	0.6	1	0.359531	1.04886	257200	0.0167589	2.5	0.984771	0.999909	0.898828	0.000554866	0.000527253	0.000555002	00:00:00	761083	2022-11-10
2021-09-19	1.4518e+07	0			0.4	4641.06	12282.5	2.1777e+08	716.481	2.5		0	2021-09-19	0.6405		1	0.000301451	0.000541875	0.000553887	0.000553887	0.6	1	0.3595	1.04886	257500	0.0167254	2.5	0.984771	0.999912	0.898749	0.000553887	0.000525969	0.000554017	00:00:00	761121	2022-11-10
2021-09-20	1.45187e+07	0			0.4	4503.45	11919.7	2.17781e+08	695.192	2.5		0	2021-09-20	0.640531		1	0.000291587	0.000525871	0.00055291	0.00055291	0.6	1	0.359469	1.04886	257800	0.0166919	2.5	0.984771	0.999915	0.898673	0.00055291	0.000524689	0.000553035	00:00:00	761157	2022-11-10
2021-09-21	1.45194e+07	0			0.4	4369.81	11567.4	2.17791e+08	674.521	2.5		0	2021-09-21	0.640561		1	0.00028204	0.000510326	0.000551936	0.000551936	0.6	1	0.359439	1.04886	258100	0.0166585	2.5	0.984771	0.999917	0.898598	0.000551936	0.000523413	0.000552054	00:00:00	761192	2022-11-10
2021-09-22	1.452e+07	0			0.4	4240.03	11225.2	2.178e+08	654.45	2.5		0	2021-09-22	0.64059		1	0.0002728	0.000495227	0.000550963	0.000550963	0.6	1	0.35941	1.04886	258400	0.0166252	2.5	0.984771	0.99992	0.898526	0.000550963	0.00052214	0.000551076	00:00:00	761227	2022-11-10
2021-09-23	1.45207e+07	0			0.4	4114.01	10892.7	2.1781e+08	634.963	2.5		0	2021-09-23	0.640618		1	0.000263856	0.000480562	0.000549992	0.000549992	0.6	1	0.359382	1.04886	258700	0.016592	2.5	0.984771	0.999922	0.898456	0.000549992	0.00052087	0.000550099	00:00:00	761260	2022-11-10
2021-09-24	1.45213e+07	0			0.4	3991.65	10569.9	2.17819e+08	616.043	2.5		0	2021-09-24	0.640645		1	0.0002552	0.00046632	0.000549023	0.000549023	0.6	1	0.359355	1.04886	259000	0.0165588	2.5	0.984771	0.999924	0.898388	0.000549023	0.000519604	0.000549125	00:00:00	761292	2022-11-10
2021-09-25	1.45219e+07	0			0.4	3872.84	10256.4	2.17828e+08	597.675	2.5		0	2021-09-25	0.640671		1	0.000246824	0.000452488	0.000548056	0.000548056	0.6	1	0.359329	1.04886	259300	0.0165257	2.5	0.984771	0.999927	0.898322	0.000548056	0.000518342	0.000548153	00:00:00	761324	2022-11-10
2021-09-26	1.45225e+07	0			0.4	3757.5	9951.93	2.17837e+08	579.844	2.5		0	2021-09-26	0.640697		1	0.000238717	0.000439056	0.000547092	0.000547092	0.6	1	0.359303	1.04886	259600	0.0164926	2.5	0.984771	0.999929	0.898258	0.000547092	0.000517083	0.000547182	00:00:00	761354	2022-11-10
2021-09-27	1.4523e+07	0			0.4	3645.51	9656.29	2.17845e+08	562.534	2.5		0	2021-09-27	0.640722		1	0.000230873	0.000426013	0.000546129	0.000546129	0.6	1	0.359278	1.04886	259900	0.0164596	2.5	0.984771	0.999931	0.898196	0.000546129	0.000515827	0.000546214	00:00:00	761384	2022-11-10
2021-09-28	1.45236e+07	0			0.4	3536.79	9369.21	2.17853e+08	545.73	2.5		0	2021-09-28	0.640746		1	0.000223282	0.000413347	0.000545168	0.000545168	0.6	1	0.359254	1.04886	260200	0.0164267	2.5	0.984771	0.999933	0.898136	0.000545168	0.000514574	0.000545247	00:00:00	761412	2022-11-10
2021-09-29	1.45241e+07	0			0.4	3431.25	9090.46	2.17861e+08	529.42	2.5		0	2021-09-29	0.640769		1	0.000215936	0.00040105	0.000544209	0.000544209	0.6	1	0.359231	1.04886	260500	0.0163939	2.5	0.984771	0.999935	0.898078	0.000544209	0.000513325	0.000544283	00:00:00	761440	2022-11-10
2021-09-30	1.45246e+07	0			0.4	3328.79	8819.82	2.17869e+08	513.587	2.5		0	2021-09-30	0.640792		1	0.000208829	0.00038911	0.000543252	0.000543252	0.6	1	0.359208	1.04886	260800	0.0163611	2.5	0.984771	0.999937	0.898021	0.000543252	0.00051208	0.000543321	00:00:00	761467	2022-11-10
2021-10-01	1.45251e+07	0			0.4	3229.34	8557.06	2.17877e+08	498.221	2.5		0	2021-10-01	0.640814		1	0.000201952	0.000377518	0.000542297	0.000542297	0.6	1	0.359186	1.04886	261100	0.0163284	2.5	0.984771	0.999939	0.897966	0.000542297	0.000510837	0.00054236	00:00:00	761493	2022-11-10
2021-10-02	1.45256e+07	0			0.4	3132.8	8301.97	2.17884e+08	483.306	2.5		0	2021-10-02	0.640835		1	0.000195299	0.000366263	0.000541344	0.000541344	0.6	1	0.359165	1.04886	261400	0.0162957	2.5	0.984771	0.999941	0.897913	0.000541344	0.000509599	0.000541402	00:00:00	761519	2022-11-10
2021-10-03	1.45261e+07	0			0.4	3039.09	8054.31	2.17891e+08	468.83	2.5		0	2021-10-03	0.640856		1	0.000188862	0.000355337	0.000540393	0.000540393	0.6	1	0.359144	1.04886	261700	0.0162631	2.5	0.984771	0.999942	0.897861	0.000540393	0.000508363	0.000540446	00:00:00	761543	2022-11-10
2021-10-04	1.45265e+07	0			0.4	2948.14	7813.9	2.17898e+08	454.781	2.5		0	2021-10-04	0.640876		1	0.000182634	0.000344731	0.000539444	0.000539444	0.6	1	0.359124	1.04886	262000	0.0162306	2.5	0.984771	0.999944	0.897811	0.000539444	0.000507131	0.000539491	00:00:00	761567	2022-11-10
2021-10-05	1.4527e+07	0			0.4	2859.87	7580.53	2.17904e+08	441.146	2.5		0	2021-10-05	0.640895		1	0.000176609	0.000334435	0.000538497	0.000538497	0.6	1	0.359105	1.04886	262300	0.0161981	2.5	0.984771	0.999946	0.897762	0.000538497	0.000505902	0.000538539	00:00:00	761590	2022-11-10
2021-10-06	1.45274e+07	0			0.4	2774.2	7353.99	2.17911e+08	427.914	2.5		0	2021-10-06	0.640914		1	0.00017078	0.000324441	0.000537552	0.000537552	0.6	1	0.359086	1.04886	262600	0.0161657	2.5	0.984771	0.999947	0.897715	0.000537552	0.000504676	0.000537588	00:00:00	761613	2022-11-10
2021-10-07	1.45278e+07	0			0.4	2691.05	7134.1	2.17917e+08	415.073	2.5		0	2021-10-07	0.640932		1	0.000165142	0.00031474	0.000536609	0.000536609	0.6	1	0.359068	1.04886	262900	0.0161334	2.5	0.984771	0.999949	0.897669	0.000536609	0.000503454	0.00053664	00:00:00	761635	2022-11-10
2021-10-08	1.45282e+07	0			0.4	2610.35	6920.67	2.17923e+08	402.612	2.5		0	2021-10-08	0.64095		1	0.000159687	0.000305324	0.000535668	0.000535668	0.6	1	0.35905	1.04886	263200	0.0161011	2.5	0.984771	0.999951	0.897625	0.000535668	0.000502235	0.000535693	00:00:00	761656	2022-11-10
2021-10-09	1.45286e+07	0			0.4	2532.04	6713.52	2.17929e+08	390.52	2.5		0	2021-10-09	0.640967		1	0.000154411	0.000296184	0.000534728	0.000534728	0.6	1	0.359033	1.04886	263500	0.0160689	2.5	0.984771	0.999952	0.897582	0.000534728	0.000501019	0.000534748	00:00:00	761676	2022-11-10
2021-10-10	1.4529e+07	0			0.4	2456.05	6512.46	2.17935e+08	378.786	2.5		0	2021-10-10	0.640984		1	0.000149307	0.000287314	0.000533791	0.000533791	0.6	1	0.359016	1.04886	263800	0.0160368	2.5	0.984771	0.999953	0.89754	0.000533791	0.000499807	0.000533806	00:00:00	761696	2022-11-10
2021-10-11	1.45293e+07	0			0.4	2382.31	6317.32	2.1794e+08	367.401	2.5		0	2021-10-11	0.641		1	0.00014437	0.000278706	0.000532855	0.000532855	0.6	1	0.359	1.04886	264100	0.0160047	2.5	0.984771	0.999955	0.897499	0.000532855	0.000498597	0.000532865	00:00:00	761715	2022-11-10
2021-10-12	1.45297e+07	0			0.4	2310.74	6127.95	2.17945e+08	356.353	2.5		0	2021-10-12	0.641016		1	0.000139595	0.000270351	0.000531922	0.000531922	0.6	1	0.358984	1.04886	264400	0.0159727	2.5	0.984771	0.999956	0.89746	0.000531922	0.000497391	0.000531926	00:00:00	761734	2022-11-10
2021-10-13	1.453e+07	0			0.4	2241.3	5944.16	2.17951e+08	345.634	2.5		0	2021-10-13	0.641031		1	0.000134976	0.000262242	0.00053099	0.00053099	0.6	1	0.358969	1.04886	264700	0.0159408	2.5	0.984771	0.999958	0.897422	0.00053099	0.000496189	0.000530989	00:00:00	761752	2022-11-10
2021-10-14	1.45304e+07	0			0.4	2173.93	5765.81	2.17956e+08	335.233	2.5		0	2021-10-14	0.641046		1	0.000130508	0.000254374	0.00053006	0.00053006	0.6	1	0.358954	1.04886	265000	0.0159089	2.5	0.984771	0.999959	0.897385	0.00053006	0.000494989	0.000530054	00:00:00	761770	2022-11-10
2021-10-15	1.45307e+07	0			0.4	2108.55	5592.73	2.17961e+08	325.141	2.5		0	2021-10-15	0.64106		1	0.000126187	0.000246738	0.000529133	0.000529133	0.6	1	0.35894	1.04886	265300	0.0158771	2.5	0.984771	0.99996	0.897349	0.000529133	0.000493793	0.000529121	00:00:00	761787	2022-11-10
2021-10-16	1.4531e+07	0			0.4	2045.11	5424.77	2.17965e+08	315.351	2.5		0	2021-10-16	0.641074		1	0.000122008	0.000239328	0.000528207	0.000528207	0.6	1	0.358926	1.04886	265600	0.0158453	2.5	0.984771	0.999961	0.897314	0.000528207	0.0004926	0.00052819	00:00:00	761804	2022-11-10
2021-10-17	1.45313e+07	0			0.4	1983.56	5261.79	2.1797e+08	305.851	2.5		0	2021-10-17	0.641088		1	0.000117967	0.000232138	0.000527283	0.000527283	0.6	1	0.358912	1.04886	265900	0.0158136	2.5	0.984771	0.999962	0.897281	0.000527283	0.00049141	0.000527261	00:00:00	761820	2022-11-10
2021-10-18	1.45316e+07	0			0.4	1923.85	5103.65	2.17974e+08	296.635	2.5		0	2021-10-18	0.641101		1	0.000114057	0.000225161	0.00052636	0.00052636	0.6	1	0.358899	1.04886	266200	0.015782	2.5	0.984771	0.999964	0.897248	0.00052636	0.000490223	0.000526333	00:00:00	761835	2022-11-10
2021-10-19	1.45319e+07	0			0.4	1865.91	4950.2	2.17979e+08	287.694	2.5		0	2021-10-19	0.641114		1	0.000110277	0.000218391	0.00052544	0.00052544	0.6	1	0.358886	1.04886	266500	0.0157504	2.5	0.984771	0.999965	0.897216	0.00052544	0.00048904	0.000525408	00:00:00	761850	2022-11-10
2021-10-20	1.45322e+07	0			0.4	1809.69	4801.3	2.17983e+08	279.02	2.5		0	2021-10-20	0.641126		1	0.000106621	0.000211822	0.000524522	0.000524522	0.6	1	0.358874	1.04886	266800	0.0157189	2.5	0.984771	0.999966	0.897185	0.000524522	0.000487859	0.000524484	00:00:00	761865	2022-11-10
2021-10-21	1.45325e+07	0			0.4	1755.16	4656.84	2.17987e+08	270.605	2.5		0	2021-10-21	0.641138		1	0.000103085	0.000205449	0.000523605	0.000523605	0.6	1	0.358862	1.04886	267100	0.0156875	2.5	0.984771	0.999967	0.897156	0.000523605	0.000486682	0.000523563	00:00:00	761879	2022-11-10
2021-10-22	1.45327e+07	0			0.4	1702.25	4516.67	2.17991e+08	262.441	2.5		0	2021-10-22	0.641149		1	9.96656e-05	0.000199265	0.00052269	0.00052269	0.6	1	0.358851	1.04886	267400	0.0156561	2.5	0.984771	0.999968	0.897127	0.00052269	0.000485508	0.000522643	00:00:00	761893	2022-11-10
2021-10-23	1.4533e+07	0			0.4	1650.92	4380.67	2.17995e+08	254.522	2.5		0	2021-10-23	0.641161		1	9.63589e-05	0.000193265	0.000521777	0.000521777	0.6	1	0.358839	1.04886	267700	0.0156248	2.5	0.984771	0.999969	0.897099	0.000521777	0.000484337	0.000521725	00:00:00	761906	2022-11-10
2021-10-24	1.45332e+07	0			0.4	1601.12	4248.72	2.17998e+08	246.839	2.5		0	2021-10-24	0.641171		1	9.31611e-05	0.000187444	0.000520866	0.000520866	0.6	1	0.358829	1.04886	268000	0.0155936	2.5	0.984771	0.99997	0.897071	0.000520866	0.000483169	0.000520809	00:00:00	761919	2022-11-10
2021-10-25	1.45335e+07	0			0.4	1552.82	4120.71	2.18002e+08	239.387	2.5		0	2021-10-25	0.641182		1	9.00689e-05	0.000181796	0.000519957	0.000519957	0.6	1	0.358818	1.04886	268300	0.0155624	2.5	0.984771	0.999971	0.897045	0.000519957	0.000482004	0.000519895	00:00:00	761932	2022-11-10
2021-10-26	1.45337e+07	0			0.4	1505.95	3996.51	2.18005e+08	232.157	2.5		0	2021-10-26	0.641192		1	8.70786e-05	0.000176317	0.00051905	0.00051905	0.6	1	0.358808	1.04886	268600	0.0155312	2.5	0.984771	0.999971	0.897019	0.00051905	0.000480843	0.000518983	00:00:00	761944	2022-11-10
2021-10-27	1.45339e+07	0			0.4	1460.49	3876.02	2.18009e+08	225.145	2.5		0	2021-10-27	0.641202		1	8.4187e-05	0.000171001	0.000518145	0.000518145	0.6	1	0.358798	1.04886	268900	0.0155002	2.5	0.984771	0.999972	0.896995	0.000518145	0.000479684	0.000518072	00:00:00	761956	2022-11-10
2021-10-28	1.45341e+07	0			0.4	1416.39	3759.13	2.18012e+08	218.342	2.5		0	2021-10-28	0.641212		1	8.13909e-05	0.000165844	0.000517241	0.000517241	0.6	1	0.358788	1.04886	269200	0.0154692	2.5	0.984771	0.999973	0.89697	0.000517241	0.000478529	0.000517164	00:00:00	761967	2022-11-10
2021-10-29	1.45343e+07	0			0.4	1373.61	3645.73	2.18015e+08	211.744	2.5		0	2021-10-29	0.641221		1	7.86872e-05	0.000160841	0.000516339	0.000516339	0.6	1	0.358779	1.04886	269500	0.0154382	2.5	0.984771	0.999974	0.896947	0.000516339	0.000477377	0.000516257	00:00:00	761978	2022-11-10
2021-10-30	1.45346e+07	0			0.4	1332.12	3535.73	2.18018e+08	205.343	2.5		0	2021-10-30	0.64123		1	7.60728e-05	0.000155988	0.000515439	0.000515439	0.6	1	0.35877	1.04886	269800	0.0154074	2.5	0.984771	0.999975	0.896924	0.000515439	0.000476227	0.000515352	00:00:00	761989	2022-11-10
2021-10-31	1.45348e+07	0			0.4	1291.87	3429.01	2.18021e+08	199.135	2.5		0	2021-10-31	0.641239		1	7.35448e-05	0.00015128	0.000514541	0.000514541	0.6	1	0.358761	1.04886	270100	0.0153765	2.5	0.984771	0.999976	0.896902	0.000514541	0.000475081	0.000514449	00:00:00	762000	2022-11-10
2021-11-01	1.45349e+07	0			0.4	1252.82	3325.49	2.18024e+08	193.113	2.5		0	2021-11-01	0.641248		1	7.11004e-05	0.000146713	0.000513645	0.000513645	0.6	1	0.358752	1.04886	270400	0.0153458	2.5	0.984771	0.999976	0.896881	0.000513645	0.000473938	0.000513548	00:00:00	762010	2022-11-10
2021-11-02	1.45351e+07	0			0.4	1214.95	3225.07	2.18027e+08	187.272	2.5		0	2021-11-02	0.641256		1	6.87369e-05	0.000142282	0.00051275	0.00051275	0.6	1	0.358744	1.04886	270700	0.0153151	2.5	0.984771	0.999977	0.896861	0.00051275	0.000472798	0.000512649	00:00:00	762020	2022-11-10
2021-11-03	1.45353e+07	0			0.4	1178.21	3127.65	2.1803e+08	181.607	2.5		0	2021-11-03	0.641264		1	6.64516e-05	0.000137985	0.000511858	0.000511858	0.6	1	0.358736	1.04886	271000	0.0152845	2.5	0.984771	0.999978	0.89684	0.000511858	0.000471661	0.000511751	00:00:00	762029	2022-11-10
2021-11-04	1.45355e+07	0			0.4	1142.58	3033.16	2.18032e+08	176.112	2.5		0	2021-11-04	0.641272		1	6.42419e-05	0.000133816	0.000510967	0.000510967	0.6	1	0.358728	1.04886	271300	0.0152539	2.5	0.984771	0.999978	0.896821	0.000510967	0.000470527	0.000510855	00:00:00	762038	2022-11-10
2021-11-05	1.45357e+07	0			0.4	1108.02	2941.5	2.18035e+08	170.782	2.5		0	2021-11-05	0.641279		1	6.21054e-05	0.000129772	0.000510078	0.000510078	0.6	1	0.358721	1.04886	271600	0.0152234	2.5	0.984771	0.999979	0.896802	0.000510078	0.000469396	0.000509961	00:00:00	762047	2022-11-10
2021-11-06	1.45358e+07	0			0.4	1074.5	2852.59	2.18037e+08	165.612	2.5		0	2021-11-06	0.641286		1	6.00397e-05	0.00012585	0.00050919	0.00050919	0.6	1	0.358714	1.04886	271900	0.0151929	2.5	0.984771	0.99998	0.896784	0.00050919	0.000468268	0.000509069	00:00:00	762056	2022-11-10
2021-11-07	1.4536e+07	0			0.4	1041.98	2766.35	2.1804e+08	160.599	2.5		0	2021-11-07	0.641293		1	5.80424e-05	0.000122045	0.000508305	0.000508305	0.6	1	0.358707	1.04886	272200	0.0151626	2.5	0.984771	0.99998	0.896766	0.000508305	0.000467143	0.000508179	00:00:00	762065	2022-11-10
2021-11-08	1.45361e+07	0			0.4	1010.45	2682.7	2.18042e+08	155.736	2.5		0	2021-11-08	0.6413		1	5.61113e-05	0.000118354	0.000507421	0.000507421	0.6	1	0.3587	1.04886	272500	0.0151322	2.5	0.984771	0.999981	0.896749	0.000507421	0.000466021	0.000507291	00:00:00	762073	2022-11-10
2021-11-09	1.45363e+07	0			0.4	979.86	2601.56	2.18044e+08	151.02	2.5		0	2021-11-09	0.641307		1	5.42442e-05	0.000114775	0.000506539	0.000506539	0.6	1	0.358693	1.04886	272800	0.015102	2.5	0.984771	0.999981	0.896732	0.000506539	0.000464902	0.000506404	00:00:00	762081	2022-11-10
2021-11-10	1.45364e+07	0			0.4	950.194	2522.86	2.18047e+08	146.445	2.5		0	2021-11-10	0.641313		1	5.24391e-05	0.000111303	0.000505659	0.000505659	0.6	1	0.358687	1.04886	273100	0.0150718	2.5	0.984771	0.999982	0.896716	0.000505659	0.000463785	0.000505519	00:00:00	762088	2022-11-10
2021-11-11	1.45366e+07	0			0.4	921.421	2446.53	2.18049e+08	142.009	2.5		0	2021-11-11	0.64132		1	5.06938e-05	0.000107935	0.000504781	0.000504781	0.6	1	0.35868	1.04886	273400	0.0150416	2.5	0.984771	0.999983	0.896701	0.000504781	0.000462672	0.000504636	00:00:00	762096	2022-11-10
2021-11-12	1.45367e+07	0			0.4	893.515	2372.49	2.18051e+08	137.706	2.5		0	2021-11-12	0.641326		1	4.90064e-05	0.000104669	0.000503904	0.000503904	0.6	1	0.358674	1.04886	273700	0.0150115	2.5	0.984771	0.999983	0.896685	0.000503904	0.000461562	0.000503755	00:00:00	762103	2022-11-10
2021-11-13	1.45369e+07	0			0.4	866.45	2300.68	2.18053e+08	133.534	2.5		0	2021-11-13	0.641332		1	4.7375e-05	0.000101501	0.000503029	0.000503029	0.6	1	0.358668	1.04886	274000	0.0149815	2.5	0.984771	0.999984	0.896671	0.000503029	0.000460455	0.000502875	00:00:00	762110	2022-11-10
2021-11-14	1.4537e+07	0			0.4	840.201	2231.03	2.18055e+08	129.487	2.5		0	2021-11-14	0.641337		1	4.57977e-05	9.84279e-05	0.000502156	0.000502156	0.6	1	0.358663	1.04886	274300	0.0149516	2.5	0.984771	0.999984	0.896656	0.000502156	0.00045935	0.000501997	00:00:00	762117	2022-11-10
2021-11-15	1.45371e+07	0			0.4	814.743	2163.48	2.18057e+08	125.562	2.5		0	2021-11-15	0.641343		1	4.42728e-05	9.54477e-05	0.000501285	0.000501285	0.6	1	0.358657	1.04886	274600	0.0149217	2.5	0.984771	0.999985	0.896643	0.000501285	0.000458249	0.000501122	00:00:00	762123	2022-11-10
2021-11-16	1.45372e+07	0			0.4	790.054	2097.97	2.18058e+08	121.756	2.5		0	2021-11-16	0.641348		1	4.27986e-05	9.25573e-05	0.000500415	0.000500415	0.6	1	0.358652	1.04886	274900	0.0148918	2.5	0.984771	0.999985	0.896629	0.000500415	0.00045715	0.000500247	00:00:00	762130	2022-11-10
2021-11-17	1.45373e+07	0			0.4	766.109	2034.42	2.1806e+08	118.064	2.5		0	2021-11-17	0.641354		1	4.13733e-05	8.9754e-05	0.000499547	0.000499547	0.6	1	0.358646	1.04886	275200	0.014862	2.5	0.984771	0.999985	0.896616	0.000499547	0.000456055	0.000499375	00:00:00	762136	2022-11-10
2021-11-18	1.45375e+07	0			0.4	742.886	1972.8	2.18062e+08	114.484	2.5		0	2021-11-18	0.641359		1	3.99953e-05	8.70351e-05	0.000498681	0.000498681	0.6	1	0.358641	1.04886	275500	0.0148323	2.5	0.984771	0.999986	0.896603	0.000498681	0.000454962	0.000498504	00:00:00	762142	2022-11-10
2021-11-19	1.45376e+07	0			0.4	720.365	1913.03	2.18064e+08	111.012	2.5		0	2021-11-19	0.641364		1	3.86632e-05	8.43982e-05	0.000497817	0.000497817	0.6	1	0.358636	1.04886	275800	0.0148026	2.5	0.984771	0.999986	0.896591	0.000497817	0.000453872	0.000497635	00:00:00	762148	2022-11-10
2021-11-20	1.45377e+07	0			0.4	698.524	1855.06	2.18065e+08	107.646	2.5		0	2021-11-20	0.641368		1	3.73753e-05	8.18409e-05	0.000496954	0.000496954	0.6	1	0.358632	1.04886	276100	0.014773	2.5	0.984771	0.999987	0.896579	0.000496954	0.000452785	0.000496768	00:00:00	762153	2022-11-10
2021-11-21	1.45378e+07	0			0.4	677.342	1798.84	2.18067e+08	104.38	2.5		0	2021-11-21	0.641373		1	3.61302e-05	7.93606e-05	0.000496093	0.000496093	0.6	1	0.358627	1.04886	276400	0.0147435	2.5	0.984771	0.999987	0.896568	0.000496093	0.000451701	0.000495903	00:00:00	762159	2022-11-10
2021-11-22	1.45379e+07	0			0.4	656.801	1744.32	2.18068e+08	101.214	2.5		0	2021-11-22	0.641377		1	3.49265e-05	7.69553e-05	0.000495234	0.000495234	0.6	1	0.358623	1.04886	276700	0.014714	2.5	0.984771	0.999988	0.896557	0.000495234	0.00045062	0.000495039	00:00:00	762164	2022-11-10
2021-11-23	1.4538e+07	0			0.4	636.88	1691.44	2.1807e+08	98.1432	2.5		0	2021-11-23	0.641382		1	3.37628e-05	7.46225e-05	0.000494377	0.000494377	0.6	1	0.358618	1.04886	277000	0.0146846	2.5	0.984771	0.999988	0.896546	0.000494377	0.000449541	0.000494177	00:00:00	762169	2022-11-10
2021-11-24	1.45381e+07	0			0.4	617.561	1640.16	2.18071e+08	95.1653	2.5		0	2021-11-24	0.641386		1	3.26378e-05	7.23601e-05	0.000493521	0.000493521	0.6	1	0.358614	1.04886	277300	0.0146552	2.5	0.984771	0.999988	0.896535	0.000493521	0.000448466	0.000493317	00:00:00	762174	2022-11-10
2021-11-25	1.45382e+07	0			0.4	598.826	1590.43	2.18073e+08	92.2775	2.5		0	2021-11-25	0.64139		1	3.15503e-05	7.01661e-05	0.000492667	0.000492667	0.6	1	0.35861	1.04886	277600	0.0146259	2.5	0.984771	0.999989	0.896525	0.000492667	0.000447393	0.000492458	00:00:00	762179	2022-11-10
2021-11-26	1.45383e+07	0			0.4	580.657	1542.2	2.18074e+08	89.477	2.5		0	2021-11-26	0.641394		1	3.04989e-05	6.80383e-05	0.000491815	0.000491815	0.6	1	0.358606	1.04886	277900	0.0145966	2.5	0.984771	0.999989	0.896515	0.000491815	0.000446323	0.000491602	00:00:00	762184	2022-11-10
2021-11-27	1.45383e+07	0			0.4	563.038	1495.43	2.18075e+08	86.7613	2.5		0	2021-11-27	0.641398		1	2.94825e-05	6.59748e-05	0.000490964	0.000490964	0.6	1	0.358602	1.04886	278200	0.0145674	2.5	0.984771	0.999989	0.896506	0.000490964	0.000445256	0.000490747	00:00:00	762189	2022-11-10
2021-11-28	1.45384e+07	0			0.4	545.952	1450.07	2.18076e+08	84.1278	2.5		0	2021-11-28	0.641401		1	2.84999e-05	6.39737e-05	0.000490115	0.000490115	0.6	1	0.358599	1.04886	278500	0.0145383	2.5	0.984771	0.99999	0.896496	0.000490115	0.000444192	0.000489893	00:00:00	762193	2022-11-10
2021-11-29	1.45385e+07	0			0.4	529.383	1406.08	2.18078e+08	81.574	2.5		0	2021-11-29	0.641405		1	2.755e-05	6.2033e-05	0.000489268	0.000489268	0.6	1	0.358595	1.04886	278800	0.0145092	2.5	0.984771	0.99999	0.896487	0.000489268	0.00044313	0.000489042	00:00:00	762197	2022-11-10
2021-11-30	1.45386e+07	0			0.4	513.315	1363.42	2.18079e+08	79.0975	2.5		0	2021-11-30	0.641408		1	2.66317e-05	6.01511e-05	0.000488422	0.000488422	0.6	1	0.358592	1.04886	279100	0.0144802	2.5	0.984771	0.99999	0.896479	0.000488422	0.000442071	0.000488192	00:00:00	762201	2022-11-10
2021-12-01	1.45387e+07	0			0.4	497.734	1322.06	2.1808e+08	76.696	2.5		0	2021-12-01	0.641412		1	2.5744e-05	5.8326e-05	0.000487578	0.000487578	0.6	1	0.358588	1.04886	279400	0.0144513	2.5	0.984771	0.999991	0.89647	0.000487578	0.000441015	0.000487344	00:00:00	762205	2022-11-10
2021-12-02	1.45387e+07	0			0.4	482.624	1281.94	2.18081e+08	74.3673	2.5		0	2021-12-02	0.641415		1	2.48859e-05	5.65561e-05	0.000486736	0.000486736	0.6	1	0.358585	1.04886	279700	0.0144224	2.5	0.984771	0.999991	0.896462	0.000486736	0.000439962	0.000486497	00:00:00	762209	2022-11-10
2021-12-03	1.45388e+07	0			0.4	467.972	1243.04	2.18082e+08	72.109	2.5		0	2021-12-03	0.641418		1	2.40563e-05	5.48398e-05	0.000485896	0.000485896	0.6	1	0.358582	1.04886	280000	0.0143935	2.5	0.984771	0.999991	0.896454	0.000485896	0.000438912	0.000485652	00:00:00	762213	2022-11-10
2021-12-04	1.45389e+07	0			0.4	453.763	1205.31	2.18083e+08	69.9192	2.5		0	2021-12-04	0.641421		1	2.32543e-05	5.31754e-05	0.000485057	0.000485057	0.6	1	0.358579	1.04886	280300	0.0143647	2.5	0.984771	0.999991	0.896446	0.000485057	0.000437864	0.000484809	00:00:00	762217	2022-11-10
2021-12-05	1.4539e+07	0			0.4	439.985	1168.72	2.18084e+08	67.7957	2.5		0	2021-12-05	0.641424		1	2.2479e-05	5.15614e-05	0.00048422	0.00048422	0.6	1	0.358576	1.04886	280600	0.014336	2.5	0.984771	0.999992	0.896439	0.00048422	0.000436819	0.000483968	00:00:00	762220	2022-11-10
2021-12-06	1.4539e+07	0			0.4	426.624	1133.25	2.18085e+08	65.7366	2.5		0	2021-12-06	0.641427		1	2.17296e-05	4.99962e-05	0.000483384	0.000483384	0.6	1	0.358573	1.04886	280900	0.0143073	2.5	0.984771	0.999992	0.896432	0.000483384	0.000435777	0.000483128	00:00:00	762224	2022-11-10
2021-12-07	1.45391e+07	0			0.4	413.668	1098.84	2.18086e+08	63.7399	2.5		0	2021-12-07	0.64143		1	2.10051e-05	4.84784e-05	0.00048255	0.00048255	0.6	1	0.35857	1.04886	281200	0.0142787	2.5	0.984771	0.999992	0.896425	0.00048255	0.000434738	0.00048229	00:00:00	762227	2022-11-10
2021-12-08	1.45391e+07	0			0.4	401.104	1065.48	2.18087e+08	61.8036	2.5		0	2021-12-08	0.641433		1	2.03048e-05	4.70066e-05	0.000481718	0.000481718	0.6	1	0.358567	1.04886	281500	0.0142501	2.5	0.984771	0.999992	0.896418	0.000481718	0.000433701	0.000481454	00:00:00	762230	2022-11-10
2021-12-09	1.45392e+07	0			0.4	388.921	1033.13	2.18088e+08	59.9261	2.5		0	2021-12-09	0.641436		1	1.96277e-05	4.55793e-05	0.000480888	0.000480888	0.6	1	0.358564	1.04886	281800	0.0142216	2.5	0.984771	0.999993	0.896411	0.000480888	0.000432667	0.000480619	00:00:00	762233	2022-11-10
2021-12-10	1.45393e+07	0			0.4	377.107	1001.76	2.18089e+08	58.1055	2.5		0	2021-12-10	0.641438		1	1.89733e-05	4.41953e-05	0.000480059	0.000480059	0.6	1	0.358562	1.04886	282100	0.0141932	2.5	0.984771	0.999993	0.896405	0.000480059	0.000431635	0.000479786	00:00:00	762237	2022-11-10
2021-12-11	1.45393e+07	0			0.4	365.652	971.339	2.1809e+08	56.3402	2.5		0	2021-12-11	0.641441		1	1.83406e-05	4.28532e-05	0.000479232	0.000479232	0.6	1	0.358559	1.04886	282400	0.0141648	2.5	0.984771	0.999993	0.896399	0.000479232	0.000430607	0.000478955	00:00:00	762239	2022-11-10
2021-12-12	1.45394e+07	0			0.4	354.544	941.839	2.18091e+08	54.6283	2.5		0	2021-12-12	0.641443		1	1.77291e-05	4.15517e-05	0.000478406	0.000478406	0.6	1	0.358557	1.04886	282700	0.0141365	2.5	0.984771	0.999993	0.896393	0.000478406	0.000429581	0.000478125	00:00:00	762242	2022-11-10
2021-12-13	1.45394e+07	0			0.4	343.772	913.233	2.18091e+08	52.9684	2.5		0	2021-12-13	0.641445		1	1.71379e-05	4.02897e-05	0.000477582	0.000477582	0.6	1	0.358555	1.04886	283000	0.0141082	2.5	0.984771	0.999993	0.896387	0.000477582	0.000428558	0.000477297	00:00:00	762245	2022-11-10
2021-12-14	1.45395e+07	0			0.4	333.327	885.495	2.18092e+08	51.3588	2.5		0	2021-12-14	0.641448		1	1.65664e-05	3.90659e-05	0.00047676	0.00047676	0.6	1	0.358552	1.04886	283300	0.01408	2.5	0.984771	0.999994	0.896381	0.00047676	0.000427537	0.00047647	00:00:00	762248	2022-11-10
2021-12-15	1.45395e+07	0			0.4	323.199	858.597	2.18093e+08	49.7981	2.5		0	2021-12-15	0.64145		1	1.60139e-05	3.78793e-05	0.000475939	0.000475939	0.6	1	0.35855	1.04886	283600	0.0140518	2.5	0.984771	0.999994	0.896376	0.000475939	0.000426519	0.000475646	00:00:00	762250	2022-11-10
2021-12-16	1.45396e+07	0			0.4	313.378	832.514	2.18094e+08	48.2847	2.5		0	2021-12-16	0.641452		1	1.54799e-05	3.67286e-05	0.00047512	0.00047512	0.6	1	0.358548	1.04886	283900	0.0140237	2.5	0.984771	0.999994	0.89637	0.00047512	0.000425504	0.000474822	00:00:00	762253	2022-11-10
2021-12-17	1.45396e+07	0			0.4	303.855	807.222	2.18094e+08	46.8172	2.5		0	2021-12-17	0.641454		1	1.49636e-05	3.56127e-05	0.000474303	0.000474303	0.6	1	0.358546	1.04886	284200	0.0139957	2.5	0.984771	0.999994	0.896365	0.000474303	0.000424491	0.000474001	00:00:00	762255	2022-11-10
2021-12-18	1.45397e+07	0			0.4	294.621	782.697	2.18095e+08	45.3942	2.5		0	2021-12-18	0.641456		1	1.44646e-05	3.45308e-05	0.000473487	0.000473487	0.6	1	0.358544	1.04886	284500	0.0139677	2.5	0.984771	0.999994	0.89636	0.000473487	0.000423481	0.000473181	00:00:00	762258	2022-11-10
2021-12-19	1.45397e+07	0			0.4	285.667	758.916	2.18096e+08	44.0145	2.5		0	2021-12-19	0.641458		1	1.39822e-05	3.34816e-05	0.000472673	0.000472673	0.6	1	0.358542	1.04886	284800	0.0139398	2.5	0.984771	0.999995	0.896355	0.000472673	0.000422474	0.000472363	00:00:00	762260	2022-11-10
2021-12-20	1.45398e+07	0			0.4	276.985	735.856	2.18096e+08	42.6766	2.5		0	2021-12-20	0.64146		1	1.35159e-05	3.24642e-05	0.00047186	0.00047186	0.6	1	0.35854	1.04886	285100	0.0139119	2.5	0.984771	0.999995	0.896351	0.00047186	0.000421469	0.000471546	00:00:00	762262	2022-11-10
2021-12-21	1.45398e+07	0			0.4	268.566	713.495	2.18097e+08	41.3793	2.5		0	2021-12-21	0.641462		1	1.30651e-05	3.14777e-05	0.000471049	0.000471049	0.6	1	0.358538	1.04886	285400	0.0138841	2.5	0.984771	0.999995	0.896346	0.000471049	0.000420467	0.000470731	00:00:00	762265	2022-11-10
2021-12-22	1.45398e+07	0			0.4	260.403	691.813	2.18098e+08	40.1214	2.5		0	2021-12-22	0.641463		1	1.26294e-05	3.05212e-05	0.00047024	0.00047024	0.6	1	0.358537	1.04886	285700	0.0138563	2.5	0.984771	0.999995	0.896342	0.00047024	0.000419467	0.000469918	00:00:00	762267	2022-11-10
2021-12-23	1.45399e+07	0			0.4	252.488	670.789	2.18098e+08	38.9017	2.5		0	2021-12-23	0.641465		1	1.22082e-05	2.95936e-05	0.000469432	0.000469432	0.6	1	0.358535	1.04886	286000	0.0138286	2.5	0.984771	0.999995	0.896337	0.000469432	0.00041847	0.000469106	00:00:00	762269	2022-11-10
2021-12-24	1.45399e+07	0			0.4	244.812	650.402	2.18099e+08	37.719	2.5		0	2021-12-24	0.641467		1	1.1801e-05	2.86942e-05	0.000468626	0.000468626	0.6	1	0.358533	1.04886	286300	0.0138009	2.5	0.984771	0.999995	0.896333	0.000468626	0.000417476	0.000468296	00:00:00	762271	2022-11-10
2021-12-25	1.45399e+07	0			0.4	237.37	630.634	2.18099e+08	36.5723	2.5		0	2021-12-25	0.641468		1	1.14075e-05	2.78221e-05	0.000467821	0.000467821	0.6	1	0.358532	1.04886	286600	0.0137733	2.5	0.984771	0.999995	0.896329	0.000467821	0.000416484	0.000467487	00:00:00	762273	2022-11-10
2021-12-26	1.454e+07	0			0.4	230.154	611.466	2.181e+08	35.4603	2.5		0	2021-12-26	0.64147		1	1.1027e-05	2.69765e-05	0.000467018	0.000467018	0.6	1	0.35853	1.04886	286900	0.0137458	2.5	0.984771	0.999996	0.896325	0.000467018	0.000415495	0.00046668	00:00:00	762274	2022-11-10
2021-12-27	1.454e+07	0			0.4	223.157	592.88	2.181e+08	34.3821	2.5		0	2021-12-27	0.641471		1	1.06592e-05	2.61565e-05	0.000466217	0.000466217	0.6	1	0.358529	1.04886	287200	0.0137183	2.5	0.984771	0.999996	0.896321	0.000466217	0.000414508	0.000465875	00:00:00	762276	2022-11-10
2021-12-28	1.45401e+07	0			0.4	216.372	574.858	2.18101e+08	33.3367	2.5		0	2021-12-28	0.641473		1	1.03037e-05	2.53614e-05	0.000465417	0.000465417	0.6	1	0.358527	1.04886	287500	0.0136908	2.5	0.984771	0.999996	0.896318	0.000465417	0.000413524	0.000465071	00:00:00	762278	2022-11-10
2021-12-29	1.45401e+07	0			0.4	209.793	557.383	2.18101e+08	32.323	2.5		0	2021-12-29	0.641474		1	9.96006e-06	2.45904e-05	0.000464619	0.000464619	0.6	1	0.358526	1.04886	287800	0.0136635	2.5	0.984771	0.999996	0.896314	0.000464619	0.000412543	0.000464269	00:00:00	762280	2022-11-10
2021-12-30	1.45401e+07	0			0.4	203.415	540.438	2.18102e+08	31.3401	2.5		0	2021-12-30	0.641476		1	9.62787e-06	2.38429e-05	0.000463822	0.000463822	0.6	1	0.358524	1.04886	288100	0.0136361	2.5	0.984771	0.999996	0.896311	0.000463822	0.000411564	0.000463469	00:00:00	762281	2022-11-10
2021-12-31	1.45401e+07	0			0.4	197.229	524.008	2.18102e+08	30.3871	2.5		0	2021-12-31	0.641477		1	9.30676e-06	2.3118e-05	0.000463027	0.000463027	0.6	1	0.358523	1.04886	288400	0.0136089	2.5	0.984771	0.999996	0.896307	0.000463027	0.000410587	0.00046267	00:00:00	762283	2022-11-10
2022-01-01	1.45402e+07	0			0.4	191.232	508.077	2.18103e+08	29.463	2.5		0	2022-01-01	0.641478		1	8.99635e-06	2.24152e-05	0.000462233	0.000462233	0.6	1	0.358522	1.04886	288700	0.0135816	2.5	0.984771	0.999996	0.896304	0.000462233	0.000409613	0.000461872	00:00:00	762285	2022-11-10
2022-01-02	1.45402e+07	0			0.4	185.417	492.63	2.18103e+08	28.567	2.5		0	2022-01-02	0.64148		1	8.6963e-06	2.17337e-05	0.000461441	0.000461441	0.6	1	0.35852	1.04886	289000	0.0135545	2.5	0.984771	0.999996	0.896301	0.000461441	0.000408642	0.000461076	00:00:00	762286	2022-11-10
2022-01-03	1.45402e+07	0			0.4	179.779	477.651	2.18103e+08	27.6982	2.5		0	2022-01-03	0.641481		1	8.40626e-06	2.10729e-05	0.000460651	0.000460651	0.6	1	0.358519	1.04886	289300	0.0135274	2.5	0.984771	0.999997	0.896298	0.000460651	0.000407673	0.000460282	00:00:00	762287	2022-11-10
2022-01-04	1.45403e+07	0			0.4	174.311	463.128	2.18104e+08	26.8559	2.5		0	2022-01-04	0.641482		1	8.1259e-06	2.04321e-05	0.000459862	0.000459862	0.6	1	0.358518	1.04886	289600	0.0135003	2.5	0.984771	0.999997	0.896295	0.000459862	0.000406707	0.000459489	00:00:00	762289	2022-11-10
2022-01-05	1.45403e+07	0			0.4	169.01	449.046	2.18104e+08	26.0391	2.5		0	2022-01-05	0.641483		1	7.85488e-06	1.98108e-05	0.000459075	0.000459075	0.6	1	0.358517	1.04886	289900	0.0134733	2.5	0.984771	0.999997	0.896292	0.000459075	0.000405743	0.000458698	00:00:00	762290	2022-11-10
2022-01-06	1.45403e+07	0			0.4	163.87	435.391	2.18105e+08	25.2471	2.5		0	2022-01-06	0.641484		1	7.59291e-06	1.92084e-05	0.000458289	0.000458289	0.6	1	0.358516	1.04886	290200	0.0134464	2.5	0.984771	0.999997	0.896289	0.000458289	0.000404782	0.000457909	00:00:00	762292	2022-11-10
2022-01-07	1.45403e+07	0			0.4	158.886	422.151	2.18105e+08	24.4792	2.5		0	2022-01-07	0.641485		1	7.33967e-06	1.86243e-05	0.000457505	0.000457505	0.6	1	0.358515	1.04886	290500	0.0134195	2.5	0.984771	0.999997	0.896287	0.000457505	0.000403823	0.000457121	00:00:00	762293	2022-11-10
2022-01-08	1.45404e+07	0			0.4	154.054	409.314	2.18105e+08	23.7346	2.5		0	2022-01-08	0.641486		1	7.09488e-06	1.8058e-05	0.000456722	0.000456722	0.6	1	0.358514	1.04886	290800	0.0133926	2.5	0.984771	0.999997	0.896284	0.000456722	0.000402866	0.000456334	00:00:00	762294	2022-11-10
2022-01-09	1.45404e+07	0			0.4	149.369	396.866	2.18106e+08	23.0127	2.5		0	2022-01-09	0.641487		1	6.85826e-06	1.75088e-05	0.000455941	0.000455941	0.6	1	0.358513	1.04886	291100	0.0133659	2.5	0.984771	0.999997	0.896281	0.000455941	0.000401912	0.000455549	00:00:00	762295	2022-11-10
2022-01-10	1.45404e+07	0			0.4	144.825	384.797	2.18106e+08	22.3127	2.5		0	2022-01-10	0.641488		1	6.62953e-06	1.69763e-05	0.000455161	0.000455161	0.6	1	0.358512	1.04886	291400	0.0133391	2.5	0.984771	0.999997	0.896279	0.000455161	0.000400961	0.000454766	00:00:00	762296	2022-11-10
2022-01-11	1.45404e+07	0			0.4	140.42	373.094	2.18106e+08	21.634	2.5		0	2022-01-11	0.641489		1	6.40843e-06	1.646e-05	0.000454383	0.000454383	0.6	1	0.358511	1.04886	291700	0.0133124	2.5	0.984771	0.999997	0.896277	0.000454383	0.000400012	0.000453984	00:00:00	762298	2022-11-10
2022-01-12	1.45404e+07	0			0.4	136.149	361.747	2.18107e+08	20.9759	2.5		0	2022-01-12	0.64149		1	6.1947e-06	1.59594e-05	0.000453606	0.000453606	0.6	1	0.35851	1.04886	292000	0.0132858	2.5	0.984771	0.999997	0.896274	0.000453606	0.000399065	0.000453204	00:00:00	762299	2022-11-10
2022-01-13	1.45405e+07	0			0.4	132.008	350.744	2.18107e+08	20.3378	2.5		0	2022-01-13	0.641491		1	5.98811e-06	1.5474e-05	0.000452831	0.000452831	0.6	1	0.358509	1.04886	292300	0.0132592	2.5	0.984771	0.999997	0.896272	0.000452831	0.000398121	0.000452425	00:00:00	762300	2022-11-10
2022-01-14	1.45405e+07	0			0.4	127.992	340.076	2.18107e+08	19.7191	2.5		0	2022-01-14	0.641492		1	5.78841e-06	1.50034e-05	0.000452058	0.000452058	0.6	1	0.358508	1.04886	292600	0.0132327	2.5	0.984771	0.999998	0.89627	0.000452058	0.000397179	0.000451648	00:00:00	762301	2022-11-10
2022-01-15	1.45405e+07	0			0.4	124.099	329.733	2.18108e+08	19.1193	2.5		0	2022-01-15	0.641493		1	5.59536e-06	1.4547e-05	0.000451286	0.000451286	0.6	1	0.358507	1.04886	292900	0.0132063	2.5	0.984771	0.999998	0.896268	0.000451286	0.00039624	0.000450872	00:00:00	762302	2022-11-10
2022-01-16	1.45405e+07	0			0.4	120.324	319.703	2.18108e+08	18.5376	2.5		0	2022-01-16	0.641494		1	5.40876e-06	1.41046e-05	0.000450515	0.000450515	0.6	1	0.358506	1.04886	293200	0.0131799	2.5	0.984771	0.999998	0.896266	0.000450515	0.000395303	0.000450098	00:00:00	762303	2022-11-10
2022-01-17	1.45405e+07	0			0.4	116.663	309.979	2.18108e+08	17.9737	2.5		0	2022-01-17	0.641495		1	5.22839e-06	1.36755e-05	0.000449746	0.000449746	0.6	1	0.358505	1.04886	293500	0.0131535	2.5	0.984771	0.999998	0.896264	0.000449746	0.000394369	0.000449325	00:00:00	762304	2022-11-10
2022-01-18	1.45406e+07	0			0.4	113.114	300.55	2.18108e+08	17.4269	2.5		0	2022-01-18	0.641495		1	5.05403e-06	1.32595e-05	0.000448978	0.000448978	0.6	1	0.358505	1.04886	293800	0.0131272	2.5	0.984771	0.999998	0.896262	0.000448978	0.000393437	0.000448554	00:00:00	762305	2022-11-10
2022-01-19	1.45406e+07	0			0.4	109.673	291.407	2.18109e+08	16.8967	2.5		0	2022-01-19	0.641496		1	4.88549e-06	1.28562e-05	0.000448212	0.000448212	0.6	1	0.358504	1.04886	294100	0.0131009	2.5	0.984771	0.999998	0.89626	0.000448212	0.000392507	0.000447784	00:00:00	762306	2022-11-10
2022-01-20	1.45406e+07	0			0.4	106.337	282.543	2.18109e+08	16.3826	2.5		0	2022-01-20	0.641497		1	4.72257e-06	1.24651e-05	0.000447448	0.000447448	0.6	1	0.358503	1.04886	294400	0.0130747	2.5	0.984771	0.999998	0.896258	0.000447448	0.00039158	0.000447016	00:00:00	762306	2022-11-10
2022-01-21	1.45406e+07	0			0.4	103.102	273.948	2.18109e+08	15.8842	2.5		0	2022-01-21	0.641497		1	4.56509e-06	1.20859e-05	0.000446685	0.000446685	0.6	1	0.358503	1.04886	294700	0.0130486	2.5	0.984771	0.999998	0.896256	0.000446685	0.000390655	0.000446249	00:00:00	762307	2022-11-10
2022-01-22	1.45406e+07	0			0.4	99.965	265.614	2.18109e+08	15.4009	2.5		0	2022-01-22	0.641498		1	4.41286e-06	1.17183e-05	0.000445923	0.000445923	0.6	1	0.358502	1.04886	295000	0.0130225	2.5	0.984771	0.999998	0.896255	0.000445923	0.000389732	0.000445484	00:00:00	762308	2022-11-10
2022-01-23	1.45406e+07	0			0.4	96.9237	257.534	2.1811e+08	14.9323	2.5		0	2022-01-23	0.641499		1	4.2657e-06	1.13618e-05	0.000445163	0.000445163	0.6	1	0.358501	1.04886	295300	0.0129964	2.5	0.984771	0.999998	0.896253	0.000445163	0.000388812	0.000444721	00:00:00	762309	2022-11-10
2022-01-24	1.45407e+07	0			0.4	93.9748	249.699	2.1811e+08	14.478	2.5		0	2022-01-24	0.641499		1	4.12346e-06	1.10161e-05	0.000444404	0.000444404	0.6	1	0.358501	1.04886	295600	0.0129704	2.5	0.984771	0.999998	0.896251	0.000444404	0.000387894	0.000443958	00:00:00	762310	2022-11-10
2022-01-25	1.45407e+07	0			0.4	91.1156	242.103	2.1811e+08	14.0375	2.5		0	2022-01-25	0.6415		1	3.98596e-06	1.0681e-05	0.000443647	0.000443647	0.6	1	0.3585	1.04886	295900	0.0129445	2.5	0.984771	0.999998	0.89625	0.000443647	0.000386979	0.000443198	00:00:00	762310	2022-11-10
2022-01-26	1.45407e+07	0			0.4	88.3434	234.737	2.1811e+08	13.6104	2.5		0	2022-01-26	0.641501		1	3.85305e-06	1.03561e-05	0.000442891	0.000442891	0.6	1	0.358499	1.04886	296200	0.0129186	2.5	0.984771	0.999998	0.896248	0.000442891	0.000386066	0.000442439	00:00:00	762311	2022-11-10
2022-01-27	1.45407e+07	0			0.4	85.6555	227.596	2.1811e+08	13.1963	2.5		0	2022-01-27	0.641501		1	3.72458e-06	1.0041e-05	0.000442137	0.000442137	0.6	1	0.358499	1.04886	296500	0.0128928	2.5	0.984771	0.999998	0.896247	0.000442137	0.000385155	0.000441681	00:00:00	762312	2022-11-10
2022-01-28	1.45407e+07	0			0.4	83.0493	220.671	2.18111e+08	12.7947	2.5		0	2022-01-28	0.641502		1	3.60039e-06	9.73549e-06	0.000441384	0.000441384	0.6	1	0.358498	1.04886	296800	0.012867	2.5	0.984771	0.999998	0.896245	0.000441384	0.000384247	0.000440925	00:00:00	762312	2022-11-10
2022-01-29	1.45407e+07	0			0.4	80.5224	213.957	2.18111e+08	12.4054	2.5		0	2022-01-29	0.641502		1	3.48034e-06	9.43929e-06	0.000440633	0.000440633	0.6	1	0.358498	1.04886	297100	0.0128413	2.5	0.984771	0.999998	0.896244	0.000440633	0.000383341	0.00044017	00:00:00	762313	2022-11-10
2022-01-30	1.45407e+07	0			0.4	78.0723	207.448	2.18111e+08	12.0279	2.5		0	2022-01-30	0.641503		1	3.36429e-06	9.1521e-06	0.000439883	0.000439883	0.6	1	0.358497	1.04886	297400	0.0128156	2.5	0.984771	0.999999	0.896243	0.000439883	0.000382437	0.000439417	00:00:00	762314	2022-11-10
2022-01-31	1.45407e+07	0			0.4	75.6967	201.136	2.18111e+08	11.662	2.5		0	2022-01-31	0.641503		1	3.25212e-06	8.87364e-06	0.000439135	0.000439135	0.6	1	0.358497	1.04886	297700	0.0127899	2.5	0.984771	0.999999	0.896241	0.000439135	0.000381535	0.000438665	00:00:00	762314	2022-11-10
2022-02-01	1.45408e+07	0			0.4	73.3934	195.016	2.18111e+08	11.3071	2.5		0	2022-02-01	0.641504		1	3.14369e-06	8.60365e-06	0.000438388	0.000438388	0.6	1	0.358496	1.04886	298000	0.0127644	2.5	0.984771	0.999999	0.89624	0.000438388	0.000380636	0.000437915	00:00:00	762315	2022-11-10
2022-02-02	1.45408e+07	0			0.4	71.1602	189.082	2.18111e+08	10.963	2.5		0	2022-02-02	0.641504		1	3.03888e-06	8.34187e-06	0.000437643	0.000437643	0.6	1	0.358496	1.04886	298300	0.0127388	2.5	0.984771	0.999999	0.896239	0.000437643	0.000379739	0.000437166	00:00:00	762315	2022-11-10
2022-02-03	1.45408e+07	0			0.4	68.9949	183.329	2.18112e+08	10.6294	2.5		0	2022-02-03	0.641505		1	2.93756e-06	8.08806e-06	0.000436899	0.000436899	0.6	1	0.358495	1.04886	298600	0.0127134	2.5	0.984771	0.999999	0.896238	0.000436899	0.000378845	0.000436418	00:00:00	762316	2022-11-10
2022-02-04	1.45408e+07	0			0.4	66.8954	177.751	2.18112e+08	10.306	2.5		0	2022-02-04	0.641505		1	2.83963e-06	7.84196e-06	0.000436156	0.000436156	0.6	1	0.358495	1.04886	298900	0.0126879	2.5	0.984771	0.999999	0.896237	0.000436156	0.000377952	0.000435672	00:00:00	762317	2022-11-10
2022-02-05	1.45408e+07	0			0.4	64.8598	172.342	2.18112e+08	9.99235	2.5		0	2022-02-05	0.641506		1	2.74496e-06	7.60334e-06	0.000435415	0.000435415	0.6	1	0.358494	1.04886	299200	0.0126626	2.5	0.984771	0.999999	0.896236	0.000435415	0.000377062	0.000434928	00:00:00	762317	2022-11-10
2022-02-06	1.45408e+07	0			0.4	62.8861	167.098	2.18112e+08	9.68828	2.5		0	2022-02-06	0.641506		1	2.65344e-06	7.37199e-06	0.000434675	0.000434675	0.6	1	0.358494	1.04886	299500	0.0126372	2.5	0.984771	0.999999	0.896235	0.000434675	0.000376175	0.000434185	00:00:00	762318	2022-11-10
2022-02-07	1.45408e+07	0			0.4	60.9725	162.014	2.18112e+08	9.39346	2.5		0	2022-02-07	0.641507		1	2.56499e-06	7.14767e-06	0.000433937	0.000433937	0.6	1	0.358493	1.04886	299800	0.012612	2.5	0.984771	0.999999	0.896234	0.000433937	0.000375289	0.000433443	00:00:00	762318	2022-11-10
2022-02-08	1.45408e+07	0			0.4	59.1171	157.084	2.18112e+08	9.1076	2.5		0	2022-02-08	0.641507		1	2.47948e-06	6.93017e-06	0.0004332	0.0004332	0.6	1	0.358493	1.04886	300100	0.0125867	2.5	0.984771	0.999999	0.896233	0.0004332	0.000374406	0.000432703	00:00:00	762319	2022-11-10
2022-02-09	1.45408e+07	0			0.4	57.3181	152.304	2.18113e+08	8.83044	2.5		0	2022-02-09	0.641507		1	2.39682e-06	6.71929e-06	0.000432464	0.000432464	0.6	1	0.358493	1.04886	300400	0.0125616	2.5	0.984771	0.999999	0.896232	0.000432464	0.000373525	0.000431964	00:00:00	762319	2022-11-10
2022-02-10	1.45408e+07	0			0.4	55.5738	147.669	2.18113e+08	8.56172	2.5		0	2022-02-10	0.641508		1	2.31692e-06	6.51483e-06	0.00043173	0.00043173	0.6	1	0.358492	1.04886	300700	0.0125364	2.5	0.984771	0.999999	0.896231	0.00043173	0.000372646	0.000431227	00:00:00	762319	2022-11-10
2022-02-11	1.45409e+07	0			0.4	53.8827	143.176	2.18113e+08	8.30116	2.5		0	2022-02-11	0.641508		1	2.23969e-06	6.31658e-06	0.000430998	0.000430998	0.6	1	0.358492	1.04886	301000	0.0125114	2.5	0.984771	0.999999	0.89623	0.000430998	0.00037177	0.000430491	00:00:00	762320	2022-11-10
2022-02-12	1.45409e+07	0			0.4	52.2429	138.819	2.18113e+08	8.04854	2.5		0	2022-02-12	0.641508		1	2.16503e-06	6.12437e-06	0.000430267	0.000430267	0.6	1	0.358492	1.04886	301300	0.0124863	2.5	0.984771	0.999999	0.896229	0.000430267	0.000370896	0.000429756	00:00:00	762320	2022-11-10
2022-02-13	1.45409e+07	0			0.4	50.6531	134.595	2.18113e+08	7.8036	2.5		0	2022-02-13	0.641509		1	2.09286e-06	5.938e-06	0.000429537	0.000429537	0.6	1	0.358491	1.04886	301600	0.0124614	2.5	0.984771	0.999999	0.896228	0.000429537	0.000370024	0.000429023	00:00:00	762321	2022-11-10
2022-02-14	1.45409e+07	0			0.4	49.1116	130.499	2.18113e+08	7.56611	2.5		0	2022-02-14	0.641509		1	2.0231e-06	5.7573e-06	0.000428808	0.000428808	0.6	1	0.358491	1.04886	301900	0.0124364	2.5	0.984771	0.999999	0.896227	0.000428808	0.000369154	0.000428292	00:00:00	762321	2022-11-10
2022-02-15	1.45409e+07	0			0.4	47.617	126.528	2.18113e+08	7.33585	2.5		0	2022-02-15	0.641509		1	1.95566e-06	5.5821e-06	0.000428081	0.000428081	0.6	1	0.358491	1.04886	302200	0.0124116	2.5	0.984771	0.999999	0.896226	0.000428081	0.000368286	0.000427562	00:00:00	762322	2022-11-10
2022-02-16	1.45409e+07	0			0.4	46.1679	122.677	2.18113e+08	7.1126	2.5		0	2022-02-16	0.64151		1	1.89048e-06	5.41223e-06	0.000427356	0.000427356	0.6	1	0.35849	1.04886	302500	0.0123867	2.5	0.984771	0.999999	0.896226	0.000427356	0.000367421	0.000426833	00:00:00	762322	2022-11-10
2022-02-17	1.45409e+07	0			0.4	44.7628	118.944	2.18113e+08	6.89614	2.5		0	2022-02-17	0.64151		1	1.82747e-06	5.24752e-06	0.000426632	0.000426632	0.6	1	0.35849	1.04886	302800	0.012362	2.5	0.984771	0.999999	0.896225	0.000426632	0.000366558	0.000426105	00:00:00	762322	2022-11-10
2022-02-18	1.45409e+07	0			0.4	43.4006	115.324	2.18114e+08	6.68626	2.5		0	2022-02-18	0.64151		1	1.76656e-06	5.08783e-06	0.000425909	0.000425909	0.6	1	0.35849	1.04886	303100	0.0123372	2.5	0.984771	0.999999	0.896224	0.000425909	0.000365697	0.00042538	00:00:00	762323	2022-11-10
2022-02-19	1.45409e+07	0			0.4	42.0797	111.815	2.18114e+08	6.48277	2.5		0	2022-02-19	0.641511		1	1.70768e-06	4.93299e-06	0.000425188	0.000425188	0.6	1	0.358489	1.04886	303400	0.0123126	2.5	0.984771	0.999999	0.896223	0.000425188	0.000364838	0.000424655	00:00:00	762323	2022-11-10
2022-02-20	1.45409e+07	0			0.4	40.7991	108.412	2.18114e+08	6.28547	2.5		0	2022-02-20	0.641511		1	1.65076e-06	4.78287e-06	0.000424468	0.000424468	0.6	1	0.358489	1.04886	303700	0.012288	2.5	0.984771	0.999999	0.896223	0.000424468	0.000363982	0.000423932	00:00:00	762323	2022-11-10
2022-02-21	1.45409e+07	0			0.4	39.5574	105.112	2.18114e+08	6.09418	2.5		0	2022-02-21	0.641511		1	1.59575e-06	4.63731e-06	0.000423749	0.000423749	0.6	1	0.358489	1.04886	304000	0.0122634	2.5	0.984771	0.999999	0.896222	0.000423749	0.000363127	0.00042321	00:00:00	762324	2022-11-10
2022-02-22	1.45409e+07	0			0.4	38.3535	101.914	2.18114e+08	5.9087	2.5		0	2022-02-22	0.641511		1	1.54257e-06	4.49619e-06	0.000423032	0.000423032	0.6	1	0.358489	1.04886	304300	0.0122388	2.5	0.984771	0.999999	0.896221	0.000423032	0.000362275	0.00042249	00:00:00	762324	2022-11-10
2022-02-23	1.45409e+07	0			0.4	37.1863	98.812	2.18114e+08	5.72887	2.5		0	2022-02-23	0.641512		1	1.49116e-06	4.35935e-06	0.000422316	0.000422316	0.6	1	0.358488	1.04886	304600	0.0122144	2.5	0.984771	0.999999	0.896221	0.000422316	0.000361425	0.000421771	00:00:00	762324	2022-11-10
2022-02-24	1.45409e+07	0			0.4	36.0545	95.8048	2.18114e+08	5.55452	2.5		0	2022-02-24	0.641512		1	1.44146e-06	4.22668e-06	0.000421601	0.000421601	0.6	1	0.358488	1.04886	304900	0.0121899	2.5	0.984771	0.999999	0.89622	0.000421601	0.000360577	0.000421053	00:00:00	762325	2022-11-10
2022-02-25	1.45409e+07	0			0.4	34.9572	92.8891	2.18114e+08	5.38546	2.5		0	2022-02-25	0.641512		1	1.39343e-06	4.09805e-06	0.000420888	0.000420888	0.6	1	0.358488	1.04886	305200	0.0121656	2.5	0.984771	0.999999	0.896219	0.000420888	0.000359731	0.000420337	00:00:00	762325	2022-11-10
2022-02-26	1.45409e+07	0			0.4	33.8933	90.0621	2.18114e+08	5.22156	2.5		0	2022-02-26	0.641512		1	1.34699e-06	3.97333e-06	0.000420176	0.000420176	0.6	1	0.358488	1.04886	305500	0.0121412	2.5	0.984771	0.999999	0.896219	0.000420176	0.000358887	0.000419622	00:00:00	762325	2022-11-10
2022-02-27	1.4541e+07	0			0.4	32.8618	87.3211	2.18114e+08	5.06263	2.5		0	2022-02-27	0.641513		1	1.30211e-06	3.8524e-06	0.000419466	0.000419466	0.6	1	0.358487	1.04886	305800	0.0121169	2.5	0.984771	0.999999	0.896218	0.000419466	0.000358046	0.000418909	00:00:00	762325	2022-11-10
2022-02-28	1.4541e+07	0			0.4	31.8616	84.6636	2.18114e+08	4.90855	2.5		0	2022-02-28	0.641513		1	1.25872e-06	3.73516e-06	0.000418757	0.000418757	0.6	1	0.358487	1.04886	306100	0.0120927	2.5	0.984771	0.999999	0.896218	0.000418757	0.000357207	0.000418197	00:00:00	762326	2022-11-10
2022-03-01	1.4541e+07	0			0.4	30.8919	82.0869	2.18114e+08	4.75915	2.5		0	2022-03-01	0.641513		1	1.21677e-06	3.62148e-06	0.000418049	0.000418049	0.6	1	0.358487	1.04886	306400	0.0120685	2.5	0.984771	0.999999	0.896217	0.000418049	0.000356369	0.000417486	00:00:00	762326	2022-11-10
2022-03-02	1.4541e+07	0			0.4	29.9517	79.5886	2.18115e+08	4.61431	2.5		0	2022-03-02	0.641513		1	1.17623e-06	3.51126e-06	0.000417343	0.000417343	0.6	1	0.358487	1.04886	306700	0.0120444	2.5	0.984771	0.999999	0.896217	0.000417343	0.000355534	0.000416776	00:00:00	762326	2022-11-10
2022-03-03	1.4541e+07	0			0.4	29.0401	77.1663	2.18115e+08	4.47386	2.5		0	2022-03-03	0.641514		1	1.13704e-06	3.4044e-06	0.000416638	0.000416638	0.6	1	0.358486	1.04886	307000	0.0120203	2.5	0.984771	0.999999	0.896216	0.000416638	0.000354701	0.000416069	00:00:00	762326	2022-11-10
2022-03-04	1.4541e+07	0			0.4	28.1562	74.8177	2.18115e+08	4.3377	2.5		0	2022-03-04	0.641514		1	1.09915e-06	3.30078e-06	0.000415935	0.000415935	0.6	1	0.358486	1.04886	307300	0.0119963	2.5	0.984771	0.999999	0.896216	0.000415935	0.00035387	0.000415362	00:00:00	762327	2022-11-10
2022-03-05	1.4541e+07	0			0.4	27.2992	72.5406	2.18115e+08	4.20567	2.5		0	2022-03-05	0.641514		1	1.06253e-06	3.20032e-06	0.000415232	0.000415232	0.6	1	0.358486	1.04886	307600	0.0119723	2.5	0.984771	0.999999	0.896215	0.000415232	0.000353042	0.000414657	00:00:00	762327	2022-11-10
2022-03-06	1.4541e+07	0			0.4	26.4684	70.3328	2.18115e+08	4.07767	2.5		0	2022-03-06	0.641514		1	1.02713e-06	3.10292e-06	0.000414531	0.000414531	0.6	1	0.358486	1.04886	307900	0.0119483	2.5	0.984771	0.999999	0.896215	0.000414531	0.000352215	0.000413953	00:00:00	762327	2022-11-10
2022-03-07	1.4541e+07	0			0.4	25.6628	68.1922	2.18115e+08	3.95356	2.5		0	2022-03-07	0.641514		1	9.92906e-07	3.00848e-06	0.000413832	0.000413832	0.6	1	0.358486	1.04886	308200	0.0119244	2.5	0.984771	1	0.896214	0.000413832	0.00035139	0.00041325	00:00:00	762327	2022-11-10
2022-03-08	1.4541e+07	0			0.4	24.8817	66.1167	2.18115e+08	3.83322	2.5		0	2022-03-08	0.641514		1	9.59826e-07	2.91691e-06	0.000413134	0.000413134	0.6	1	0.358486	1.04886	308500	0.0119006	2.5	0.984771	1	0.896214	0.000413134	0.000350568	0.000412549	00:00:00	762327	2022-11-10
2022-03-09	1.4541e+07	0			0.4	24.1244	64.1044	2.18115e+08	3.71655	2.5		0	2022-03-09	0.641515		1	9.27849e-07	2.82814e-06	0.000412437	0.000412437	0.6	1	0.358485	1.04886	308800	0.0118768	2.5	0.984771	1	0.896214	0.000412437	0.000349747	0.000411849	00:00:00	762328	2022-11-10
2022-03-10	1.4541e+07	0			0.4	23.3901	62.1533	2.18115e+08	3.60343	2.5		0	2022-03-10	0.641515		1	8.96938e-07	2.74206e-06	0.000411741	0.000411741	0.6	1	0.358485	1.04886	309100	0.011853	2.5	0.984771	1	0.896213	0.000411741	0.000348929	0.000411151	00:00:00	762328	2022-11-10
2022-03-11	1.4541e+07	0			0.4	22.6782	60.2616	2.18115e+08	3.49375	2.5		0	2022-03-11	0.641515		1	8.67057e-07	2.6586e-06	0.000411047	0.000411047	0.6	1	0.358485	1.04886	309400	0.0118293	2.5	0.984771	1	0.896213	0.000411047	0.000348112	0.000410453	00:00:00	762328	2022-11-10
2022-03-12	1.4541e+07	0			0.4	21.9879	58.4275	2.18115e+08	3.38741	2.5		0	2022-03-12	0.641515		1	8.38172e-07	2.57768e-06	0.000410354	0.000410354	0.6	1	0.358485	1.04886	309700	0.0118057	2.5	0.984771	1	0.896212	0.000410354	0.000347298	0.000409758	00:00:00	762328	2022-11-10
2022-03-13	1.4541e+07	0			0.4	21.3187	56.6491	2.18115e+08	3.28431	2.5		0	2022-03-13	0.641515		1	8.10251e-07	2.49923e-06	0.000409662	0.000409662	0.6	1	0.358485	1.04886	310000	0.011782	2.5	0.984771	1	0.896212	0.000409662	0.000346486	0.000409063	00:00:00	762328	2022-11-10
2022-03-14	1.4541e+07	0			0.4	20.6698	54.9249	2.18115e+08	3.18434	2.5		0	2022-03-14	0.641515		1	7.8326e-07	2.42316e-06	0.000408972	0.000408972	0.6	1	0.358485	1.04886	310300	0.0117585	2.5	0.984771	1	0.896212	0.000408972	0.000345676	0.00040837	00:00:00	762328	2022-11-10
2022-03-15	1.4541e+07	0			0.4	20.0407	53.2532	2.18115e+08	3.08742	2.5		0	2022-03-15	0.641515		1	7.57169e-07	2.34941e-06	0.000408283	0.000408283	0.6	1	0.358485	1.04886	310600	0.011735	2.5	0.984771	1	0.896211	0.000408283	0.000344868	0.000407678	00:00:00	762329	2022-11-10
2022-03-16	1.4541e+07	0			0.4	19.4307	51.6323	2.18115e+08	2.99345	2.5		0	2022-03-16	0.641516		1	7.31947e-07	2.2779e-06	0.000407595	0.000407595	0.6	1	0.358484	1.04886	310900	0.0117115	2.5	0.984771	1	0.896211	0.000407595	0.000344062	0.000406988	00:00:00	762329	2022-11-10
2022-03-17	1.4541e+07	0			0.4	18.8393	50.0608	2.18115e+08	2.90233	2.5		0	2022-03-17	0.641516		1	7.07566e-07	2.20857e-06	0.000406909	0.000406909	0.6	1	0.358484	1.04886	311200	0.0116881	2.5	0.984771	1	0.896211	0.000406909	0.000343258	0.000406298	00:00:00	762329	2022-11-10
2022-03-18	1.4541e+07	0			0.4	18.2658	48.5371	2.18115e+08	2.81399	2.5		0	2022-03-18	0.641516		1	6.83998e-07	2.14134e-06	0.000406224	0.000406224	0.6	1	0.358484	1.04886	311500	0.0116647	2.5	0.984771	1	0.89621	0.000406224	0.000342455	0.000405611	00:00:00	762329	2022-11-10
2022-03-19	1.4541e+07	0			0.4	17.7099	47.0598	2.18115e+08	2.72834	2.5		0	2022-03-19	0.641516		1	6.61216e-07	2.07617e-06	0.00040554	0.00040554	0.6	1	0.358484	1.04886	311800	0.0116414	2.5	0.984771	1	0.89621	0.00040554	0.000341655	0.000404924	00:00:00	762329	2022-11-10
2022-03-20	1.4541e+07	0			0.4	17.1708	45.6274	2.18115e+08	2.64529	2.5		0	2022-03-20	0.641516		1	6.39193e-07	2.01297e-06	0.000404858	0.000404858	0.6	1	0.358484	1.04886	312100	0.0116181	2.5	0.984771	1	0.89621	0.000404858	0.000340857	0.000404239	00:00:00	762329	2022-11-10
2022-03-21	1.4541e+07	0			0.4	16.6482	44.2386	2.18116e+08	2.56478	2.5		0	2022-03-21	0.641516		1	6.17904e-07	1.9517e-06	0.000404177	0.000404177	0.6	1	0.358484	1.04886	312400	0.0115949	2.5	0.984771	1	0.89621	0.000404177	0.000340061	0.000403555	00:00:00	762330	2022-11-10
2022-03-22	1.4541e+07	0			0.4	16.1414	42.8921	2.18116e+08	2.48671	2.5		0	2022-03-22	0.641516		1	5.97324e-07	1.8923e-06	0.000403497	0.000403497	0.6	1	0.358484	1.04886	312700	0.0115717	2.5	0.984771	1	0.896209	0.000403497	0.000339267	0.000402872	00:00:00	762330	2022-11-10
2022-03-23	1.4541e+07	0			0.4	15.6501	41.5866	2.18116e+08	2.41102	2.5		0	2022-03-23	0.641516		1	5.77431e-07	1.8347e-06	0.000402818	0.000402818	0.6	1	0.358484	1.04886	313000	0.0115485	2.5	0.984771	1	0.896209	0.000402818	0.000338475	0.000402191	00:00:00	762330	2022-11-10
2022-03-24	1.4541e+07	0			0.4	15.1738	40.3208	2.18116e+08	2.33763	2.5		0	2022-03-24	0.641517		1	5.582e-07	1.77886e-06	0.000402141	0.000402141	0.6	1	0.358483	1.04886	313300	0.0115254	2.5	0.984771	1	0.896209	0.000402141	0.000337685	0.000401511	00:00:00	762330	2022-11-10
2022-03-25	1.4541e+07	0			0.4	14.7119	39.0935	2.18116e+08	2.26648	2.5		0	2022-03-25	0.641517		1	5.3961e-07	1.72471e-06	0.000401465	0.000401465	0.6	1	0.358483	1.04886	313600	0.0115024	2.5	0.984771	1	0.896208	0.000401465	0.000336897	0.000400832	00:00:00	762330	2022-11-10
2022-03-26	1.4541e+07	0			0.4	14.2641	37.9036	2.18116e+08	2.19749	2.5		0	2022-03-26	0.641517		1	5.2164e-07	1.67222e-06	0.00040079	0.00040079	0.6	1	0.358483	1.04886	313900	0.0114794	2.5	0.984771	1	0.896208	0.00040079	0.000336111	0.000400155	00:00:00	762330	2022-11-10
2022-03-27	1.4541e+07	0			0.4	13.8299	36.7499	2.18116e+08	2.1306	2.5		0	2022-03-27	0.641517		1	5.04269e-07	1.62132e-06	0.000400117	0.000400117	0.6	1	0.358483	1.04886	314200	0.0114564	2.5	0.984771	1	0.896208	0.000400117	0.000335327	0.000399478	00:00:00	762330	2022-11-10
2022-03-28	1.4541e+07	0			0.4	13.409	35.6313	2.18116e+08	2.06575	2.5		0	2022-03-28	0.641517		1	4.87476e-07	1.57197e-06	0.000399445	0.000399445	0.6	1	0.358483	1.04886	314500	0.0114335	2.5	0.984771	1	0.896208	0.000399445	0.000334545	0.000398803	00:00:00	762330	2022-11-10
2022-03-29	1.45411e+07	0			0.4	13.0008	34.5467	2.18116e+08	2.00287	2.5		0	2022-03-29	0.641517		1	4.71243e-07	1.52412e-06	0.000398774	0.000398774	0.6	1	0.358483	1.04886	314800	0.0114106	2.5	0.984771	1	0.896208	0.000398774	0.000333765	0.00039813	00:00:00	762330	2022-11-10
2022-03-30	1.45411e+07	0			0.4	12.6051	33.4952	2.18116e+08	1.9419	2.5		0	2022-03-30	0.641517		1	4.55552e-07	1.47773e-06	0.000398104	0.000398104	0.6	1	0.358483	1.04886	315100	0.0113878	2.5	0.984771	1	0.896207	0.000398104	0.000332987	0.000397458	00:00:00	762331	2022-11-10
2022-03-31	1.45411e+07	0			0.4	12.2214	32.4756	2.18116e+08	1.8828	2.5		0	2022-03-31	0.641517		1	4.40383e-07	1.43275e-06	0.000397436	0.000397436	0.6	1	0.358483	1.04886	315400	0.011365	2.5	0.984771	1	0.896207	0.000397436	0.000332211	0.000396787	00:00:00	762331	2022-11-10
2022-04-01	1.45411e+07	0			0.4	11.8494	31.4871	2.18116e+08	1.82549	2.5		0	2022-04-01	0.641517		1	4.25719e-07	1.38914e-06	0.000396769	0.000396769	0.6	1	0.358483	1.04886	315700	0.0113423	2.5	0.984771	1	0.896207	0.000396769	0.000331436	0.000396117	00:00:00	762331	2022-11-10
2022-04-02	1.45411e+07	0			0.4	11.4887	30.5287	2.18116e+08	1.76992	2.5		0	2022-04-02	0.641517		1	4.11544e-07	1.34686e-06	0.000396103	0.000396103	0.6	1	0.358483	1.04886	316000	0.0113196	2.5	0.984771	1	0.896207	0.000396103	0.000330664	0.000395448	00:00:00	762331	2022-11-10
2022-04-03	1.45411e+07	0			0.4	11.139	29.5995	2.18116e+08	1.71605	2.5		0	2022-04-03	0.641517		1	3.97841e-07	1.30586e-06	0.000395439	0.000395439	0.6	1	0.358483	1.04886	316300	0.011297	2.5	0.984771	1	0.896207	0.000395439	0.000329893	0.000394781	00:00:00	762331	2022-11-10
2022-04-04	1.45411e+07	0			0.4	10.8	28.6985	2.18116e+08	1.66381	2.5		0	2022-04-04	0.641517		1	3.84595e-07	1.26611e-06	0.000394775	0.000394775	0.6	1	0.358483	1.04886	316600	0.0112744	2.5	0.984771	1	0.896206	0.000394775	0.000329125	0.000394115	00:00:00	762331	2022-11-10
2022-04-05	1.45411e+07	0			0.4	10.4712	27.825	2.18116e+08	1.61317	2.5		0	2022-04-05	0.641518		1	3.71791e-07	1.22757e-06	0.000394113	0.000394113	0.6	1	0.358482	1.04886	316900	0.0112518	2.5	0.984771	1	0.896206	0.000394113	0.000328358	0.000393451	00:00:00	762331	2022-11-10
2022-04-06	1.45411e+07	0			0.4	10.1525	26.978	2.18116e+08	1.56406	2.5		0	2022-04-06	0.641518		1	3.59412e-07	1.19021e-06	0.000393453	0.000393453	0.6	1	0.358482	1.04886	317200	0.0112293	2.5	0.984771	1	0.896206	0.000393453	0.000327594	0.000392787	00:00:00	762331	2022-11-10
2022-04-07	1.45411e+07	0			0.4	9.84346	26.1568	2.18116e+08	1.51645	2.5		0	2022-04-07	0.641518		1	3.47447e-07	1.15398e-06	0.000392793	0.000392793	0.6	1	0.358482	1.04886	317500	0.0112069	2.5	0.984771	1	0.896206	0.000392793	0.000326831	0.000392125	00:00:00	762331	2022-11-10
2022-04-08	1.45411e+07	0			0.4	9.54383	25.3606	2.18116e+08	1.47029	2.5		0	2022-04-08	0.641518		1	3.3588e-07	1.11885e-06	0.000392135	0.000392135	0.6	1	0.358482	1.04886	317800	0.0111845	2.5	0.984771	1	0.896206	0.000392135	0.00032607	0.000391464	00:00:00	762331	2022-11-10
2022-04-09	1.45411e+07	0			0.4	9.25333	24.5887	2.18116e+08	1.42554	2.5		0	2022-04-09	0.641518		1	3.24698e-07	1.0848e-06	0.000391478	0.000391478	0.6	1	0.358482	1.04886	318100	0.0111621	2.5	0.984771	1	0.896206	0.000391478	0.000325311	0.000390804	00:00:00	762331	2022-11-10
2022-04-10	1.45411e+07	0			0.4	8.97166	23.8402	2.18116e+08	1.38215	2.5		0	2022-04-10	0.641518		1	3.13889e-07	1.05178e-06	0.000390822	0.000390822	0.6	1	0.358482	1.04886	318400	0.0111398	2.5	0.984771	1	0.896205	0.000390822	0.000324554	0.000390146	00:00:00	762331	2022-11-10
2022-04-11	1.45411e+07	0			0.4	8.69857	23.1146	2.18116e+08	1.34008	2.5		0	2022-04-11	0.641518		1	3.0344e-07	1.01976e-06	0.000390167	0.000390167	0.6	1	0.358482	1.04886	318700	0.0111175	2.5	0.984771	1	0.896205	0.000390167	0.000323799	0.000389489	00:00:00	762332	2022-11-10
2022-04-12	1.45411e+07	0			0.4	8.43379	22.411	2.18116e+08	1.29928	2.5		0	2022-04-12	0.641518		1	2.93339e-07	9.8872e-07	0.000389514	0.000389514	0.6	1	0.358482	1.04886	319000	0.0110952	2.5	0.984771	1	0.896205	0.000389514	0.000323046	0.000388833	00:00:00	762332	2022-11-10
2022-04-13	1.45411e+07	0			0.4	8.17707	21.7288	2.18116e+08	1.25973	2.5		0	2022-04-13	0.641518		1	2.83574e-07	9.58624e-07	0.000388862	0.000388862	0.6	1	0.358482	1.04886	319300	0.0110731	2.5	0.984771	1	0.896205	0.000388862	0.000322294	0.000388178	00:00:00	762332	2022-11-10
2022-04-14	1.45411e+07	0			0.4	7.92817	21.0674	2.18116e+08	1.22139	2.5		0	2022-04-14	0.641518		1	2.74135e-07	9.29444e-07	0.000388211	0.000388211	0.6	1	0.358482	1.04886	319600	0.0110509	2.5	0.984771	1	0.896205	0.000388211	0.000321545	0.000387525	00:00:00	762332	2022-11-10
2022-04-15	1.45411e+07	0			0.4	7.68684	20.4261	2.18116e+08	1.18421	2.5		0	2022-04-15	0.641518		1	2.6501e-07	9.01153e-07	0.000387561	0.000387561	0.6	1	0.358482	1.04886	319900	0.0110288	2.5	0.984771	1	0.896205	0.000387561	0.000320797	0.000386873	00:00:00	762332	2022-11-10
2022-04-16	1.45411e+07	0			0.4	7.45286	19.8044	2.18116e+08	1.14816	2.5		0	2022-04-16	0.641518		1	2.56189e-07	8.73722e-07	0.000386913	0.000386913	0.6	1	0.358482	1.04886	320200	0.0110068	2.5	0.984771	1	0.896205	0.000386913	0.000320051	0.000386222	00:00:00	762332	2022-11-10
2022-04-17	1.45411e+07	0			0.4	7.226	19.2015	2.18116e+08	1.11321	2.5		0	2022-04-17	0.641518		1	2.47662e-07	8.47127e-07	0.000386266	0.000386266	0.6	1	0.358482	1.04886	320500	0.0109847	2.5	0.984771	1	0.896204	0.000386266	0.000319307	0.000385572	00:00:00	762332	2022-11-10
2022-04-18	1.45411e+07	0			0.4	7.00604	18.6171	2.18116e+08	1.07933	2.5		0	2022-04-18	0.641518		1	2.39419e-07	8.21341e-07	0.00038562	0.00038562	0.6	1	0.358482	1.04886	320800	0.0109628	2.5	0.984771	1	0.896204	0.00038562	0.000318565	0.000384924	00:00:00	762332	2022-11-10
2022-04-19	1.45411e+07	0			0.4	6.79278	18.0504	2.18116e+08	1.04647	2.5		0	2022-04-19	0.641518		1	2.3145e-07	7.9634e-07	0.000384975	0.000384975	0.6	1	0.358482	1.04886	321100	0.0109408	2.5	0.984771	1	0.896204	0.000384975	0.000317825	0.000384276	00:00:00	762332	2022-11-10
2022-04-20	1.45411e+07	0			0.4	6.58601	17.5009	2.18116e+08	1.01462	2.5		0	2022-04-20	0.641518		1	2.23747e-07	7.721e-07	0.000384331	0.000384331	0.6	1	0.358482	1.04886	321400	0.010919	2.5	0.984771	1	0.896204	0.000384331	0.000317087	0.00038363	00:00:00	762332	2022-11-10
2022-04-21	1.45411e+07	0			0.4	6.38553	16.9682	2.18116e+08	0.983735	2.5		0	2022-04-21	0.641518		1	2.16301e-07	7.48597e-07	0.000383689	0.000383689	0.6	1	0.358482	1.04886	321700	0.0108971	2.5	0.984771	1	0.896204	0.000383689	0.00031635	0.000382985	00:00:00	762332	2022-11-10
2022-04-22	1.45411e+07	0			0.4	6.19116	16.4517	2.18116e+08	0.95379	2.5		0	2022-04-22	0.641518		1	2.09102e-07	7.2581e-07	0.000383048	0.000383048	0.6	1	0.358482	1.04886	322000	0.0108753	2.5	0.984771	1	0.896204	0.000383048	0.000315616	0.000382342	00:00:00	762332	2022-11-10
2022-04-23	1.45411e+07	0			0.4	6.0027	15.9509	2.18116e+08	0.924757	2.5		0	2022-04-23	0.641518		1	2.02143e-07	7.03717e-07	0.000382408	0.000382408	0.6	1	0.358482	1.04886	322300	0.0108536	2.5	0.984771	1	0.896204	0.000382408	0.000314883	0.000381699	00:00:00	762332	2022-11-10
2022-04-24	1.45411e+07	0			0.4	5.81998	15.4654	2.18116e+08	0.896608	2.5		0	2022-04-24	0.641519		1	1.95416e-07	6.82296e-07	0.000381769	0.000381769	0.6	1	0.358481	1.04886	322600	0.0108319	2.5	0.984771	1	0.896204	0.000381769	0.000314152	0.000381058	00:00:00	762332	2022-11-10
2022-04-25	1.45411e+07	0			0.4	5.64282	14.9946	2.18116e+08	0.869315	2.5		0	2022-04-25	0.641519		1	1.88913e-07	6.61527e-07	0.000381131	0.000381131	0.6	1	0.358481	1.04886	322900	0.0108102	2.5	0.984771	1	0.896204	0.000381131	0.000313422	0.000380418	00:00:00	762332	2022-11-10
2022-04-26	1.45411e+07	0			0.4	5.47106	14.5382	2.18116e+08	0.842853	2.5		0	2022-04-26	0.641519		1	1.82627e-07	6.41391e-07	0.000380495	0.000380495	0.6	1	0.358481	1.04886	323200	0.0107886	2.5	0.984771	1	0.896203	0.000380495	0.000312695	0.000379779	00:00:00	762332	2022-11-10
2022-04-27	1.45411e+07	0			0.4	5.30452	14.0957	2.18116e+08	0.817197	2.5		0	2022-04-27	0.641519		1	1.7655e-07	6.21867e-07	0.00037986	0.00037986	0.6	1	0.358481	1.04886	323500	0.010767	2.5	0.984771	1	0.896203	0.00037986	0.000311969	0.000379142	00:00:00	762332	2022-11-10
2022-04-28	1.45411e+07	0			0.4	5.14305	13.6666	2.18116e+08	0.792321	2.5		0	2022-04-28	0.641519		1	1.70675e-07	6.02938e-07	0.000379226	0.000379226	0.6	1	0.358481	1.04886	323800	0.0107455	2.5	0.984771	1	0.896203	0.000379226	0.000311245	0.000378505	00:00:00	762332	2022-11-10
2022-04-29	1.45411e+07	0			0.4	4.9865	13.2506	2.18116e+08	0.768203	2.5		0	2022-04-29	0.641519		1	1.64996e-07	5.84584e-07	0.000378593	0.000378593	0.6	1	0.358481	1.04886	324100	0.010724	2.5	0.984771	1	0.896203	0.000378593	0.000310523	0.00037787	00:00:00	762333	2022-11-10
2022-04-30	1.45411e+07	0			0.4	4.83471	12.8472	2.18116e+08	0.744819	2.5		0	2022-04-30	0.641519		1	1.59506e-07	5.6679e-07	0.000377962	0.000377962	0.6	1	0.358481	1.04886	324400	0.0107025	2.5	0.984771	1	0.896203	0.000377962	0.000309803	0.000377236	00:00:00	762333	2022-11-10
2022-05-01	1.45411e+07	0			0.4	4.68754	12.4562	2.18116e+08	0.722147	2.5		0	2022-05-01	0.641519		1	1.54198e-07	5.49537e-07	0.000377331	0.000377331	0.6	1	0.358481	1.04886	324700	0.0106811	2.5	0.984771	1	0.896203	0.000377331	0.000309085	0.000376603	00:00:00	762333	2022-11-10
2022-05-02	1.45411e+07	0			0.4	4.54485	12.077	2.18116e+08	0.700165	2.5		0	2022-05-02	0.641519		1	1.49068e-07	5.32809e-07	0.000376702	0.000376702	0.6	1	0.358481	1.04886	325000	0.0106598	2.5	0.984771	1	0.896203	0.000376702	0.000308368	0.000375972	00:00:00	762333	2022-11-10
2022-05-03	1.45411e+07	0			0.4	4.40651	11.7094	2.18116e+08	0.678852	2.5		0	2022-05-03	0.641519		1	1.44108e-07	5.1659e-07	0.000376074	0.000376074	0.6	1	0.358481	1.04886	325300	0.0106385	2.5	0.984771	1	0.896203	0.000376074	0.000307653	0.000375341	00:00:00	762333	2022-11-10
2022-05-04	1.45411e+07	0			0.4	4.27237	11.3529	2.18116e+08	0.658187	2.5		0	2022-05-04	0.641519		1	1.39314e-07	5.00865e-07	0.000375447	0.000375447	0.6	1	0.358481	1.04886	325600	0.0106172	2.5	0.984771	1	0.896203	0.000375447	0.00030694	0.000374712	00:00:00	762333	2022-11-10
2022-05-05	1.45411e+07	0			0.4	4.14232	11.0074	2.18116e+08	0.638152	2.5		0	2022-05-05	0.641519		1	1.34679e-07	4.85619e-07	0.000374821	0.000374821	0.6	1	0.358481	1.04886	325900	0.0105959	2.5	0.984771	1	0.896203	0.000374821	0.000306229	0.000374084	00:00:00	762333	2022-11-10
2022-05-06	1.45411e+07	0			0.4	4.01623	10.6723	2.18116e+08	0.618727	2.5		0	2022-05-06	0.641519		1	1.30198e-07	4.70837e-07	0.000374197	0.000374197	0.6	1	0.358481	1.04886	326200	0.0105747	2.5	0.984771	1	0.896203	0.000374197	0.000305519	0.000373457	00:00:00	762333	2022-11-10
2022-05-07	1.45411e+07	0			0.4	3.89398	10.3474	2.18116e+08	0.599893	2.5		0	2022-05-07	0.641519		1	1.25867e-07	4.56505e-07	0.000373573	0.000373573	0.6	1	0.358481	1.04886	326500	0.0105536	2.5	0.984771	1	0.896203	0.000373573	0.000304811	0.000372832	00:00:00	762333	2022-11-10
2022-05-08	1.45411e+07	0			0.4	3.77544	10.0325	2.18116e+08	0.581632	2.5		0	2022-05-08	0.641519		1	1.21679e-07	4.42609e-07	0.000372951	0.000372951	0.6	1	0.358481	1.04886	326800	0.0105325	2.5	0.984771	1	0.896203	0.000372951	0.000304105	0.000372207	00:00:00	762333	2022-11-10
2022-05-09	1.45411e+07	0			0.4	3.66052	9.72708	2.18116e+08	0.563927	2.5		0	2022-05-09	0.641519		1	1.17632e-07	4.29136e-07	0.00037233	0.00037233	0.6	1	0.358481	1.04886	327100	0.0105114	2.5	0.984771	1	0.896202	0.00037233	0.000303401	0.000371584	00:00:00	762333	2022-11-10
2022-05-10	1.45411e+07	0			0.4	3.54909	9.43098	2.18116e+08	0.546761	2.5		0	2022-05-10	0.641519		1	1.13718e-07	4.16073e-07	0.00037171	0.00037171	0.6	1	0.358481	1.04886	327400	0.0104904	2.5	0.984771	1	0.896202	0.00037171	0.000302698	0.000370961	00:00:00	762333	2022-11-10
2022-05-11	1.45411e+07	0			0.4	3.44106	9.1439	2.18116e+08	0.530117	2.5		0	2022-05-11	0.641519		1	1.09936e-07	4.03407e-07	0.000371091	0.000371091	0.6	1	0.358481	1.04886	327700	0.0104694	2.5	0.984771	1	0.896202	0.000371091	0.000301998	0.00037034	00:00:00	762333	2022-11-10
2022-05-12	1.45411e+07	0			0.4	3.33631	8.86556	2.18116e+08	0.51398	2.5		0	2022-05-12	0.641519		1	1.06279e-07	3.91128e-07	0.000370474	0.000370474	0.6	1	0.358481	1.04886	328000	0.0104485	2.5	0.984771	1	0.896202	0.000370474	0.000301298	0.000369721	00:00:00	762333	2022-11-10
2022-05-13	1.45411e+07	0			0.4	3.23475	8.59569	2.18116e+08	0.498335	2.5		0	2022-05-13	0.641519		1	1.02743e-07	3.79222e-07	0.000369857	0.000369857	0.6	1	0.358481	1.04886	328300	0.0104276	2.5	0.984771	1	0.896202	0.000369857	0.000300601	0.000369102	00:00:00	762333	2022-11-10
2022-05-14	1.45411e+07	0			0.4	3.13629	8.33404	2.18116e+08	0.483165	2.5		0	2022-05-14	0.641519		1	9.93259e-08	3.67678e-07	0.000369242	0.000369242	0.6	1	0.358481	1.04886	328600	0.0104067	2.5	0.984771	1	0.896202	0.000369242	0.000299905	0.000368484	00:00:00	762333	2022-11-10
2022-05-15	1.45411e+07	0			0.4	3.04082	8.08035	2.18117e+08	0.468458	2.5		0	2022-05-15	0.641519		1	9.60221e-08	3.56486e-07	0.000368628	0.000368628	0.6	1	0.358481	1.04886	328900	0.0103859	2.5	0.984771	1	0.896202	0.000368628	0.000299211	0.000367868	00:00:00	762333	2022-11-10
2022-05-16	1.45411e+07	0			0.4	2.94825	7.83438	2.18117e+08	0.454198	2.5		0	2022-05-16	0.641519		1	9.28283e-08	3.45635e-07	0.000368015	0.000368015	0.6	1	0.358481	1.04886	329200	0.0103651	2.5	0.984771	1	0.896202	0.000368015	0.000298519	0.000367253	00:00:00	762333	2022-11-10
2022-05-17	1.45411e+07	0			0.4	2.85851	7.5959	2.18117e+08	0.440372	2.5		0	2022-05-17	0.641519		1	8.97408e-08	3.35113e-07	0.000367403	0.000367403	0.6	1	0.358481	1.04886	329500	0.0103444	2.5	0.984771	1	0.896202	0.000367403	0.000297829	0.000366639	00:00:00	762333	2022-11-10
2022-05-18	1.45411e+07	0			0.4	2.77149	7.36468	2.18117e+08	0.426967	2.5		0	2022-05-18	0.641519		1	8.67561e-08	3.24912e-07	0.000366792	0.000366792	0.6	1	0.358481	1.04886	329800	0.0103237	2.5	0.984771	1	0.896202	0.000366792	0.00029714	0.000366026	00:00:00	762333	2022-11-10
2022-05-19	1.45411e+07	0			0.4	2.68713	7.1405	2.18117e+08	0.41397	2.5		0	2022-05-19	0.641519		1	8.38707e-08	3.15022e-07	0.000366182	0.000366182	0.6	1	0.358481	1.04886	330100	0.0103031	2.5	0.984771	1	0.896202	0.000366182	0.000296453	0.000365414	00:00:00	762333	2022-11-10
2022-05-20	1.45411e+07	0			0.4	2.60533	6.92314	2.18117e+08	0.401368	2.5		0	2022-05-20	0.641519		1	8.10813e-08	3.05433e-07	0.000365574	0.000365574	0.6	1	0.358481	1.04886	330400	0.0102825	2.5	0.984771	1	0.896202	0.000365574	0.000295767	0.000364803	00:00:00	762333	2022-11-10
2022-05-21	1.45411e+07	0			0.4	2.52603	6.7124	2.18117e+08	0.389151	2.5		0	2022-05-21	0.641519		1	7.83848e-08	2.96135e-07	0.000364967	0.000364967	0.6	1	0.358481	1.04886	330700	0.0102619	2.5	0.984771	1	0.896202	0.000364967	0.000295084	0.000364194	00:00:00	762333	2022-11-10
2022-05-22	1.45411e+07	0			0.4	2.44913	6.50807	2.18117e+08	0.377305	2.5		0	2022-05-22	0.641519		1	7.5778e-08	2.87121e-07	0.00036436	0.00036436	0.6	1	0.358481	1.04886	331000	0.0102414	2.5	0.984771	1	0.896202	0.00036436	0.000294402	0.000363585	00:00:00	762333	2022-11-10
2022-05-23	1.45411e+07	0			0.4	2.37458	6.30997	2.18117e+08	0.365819	2.5		0	2022-05-23	0.641519		1	7.32579e-08	2.78381e-07	0.000363755	0.000363755	0.6	1	0.358481	1.04886	331300	0.0102209	2.5	0.984771	1	0.896202	0.000363755	0.000293721	0.000362978	00:00:00	762333	2022-11-10
2022-05-24	1.45411e+07	0			0.4	2.3023	6.11789	2.18117e+08	0.354684	2.5		0	2022-05-24	0.641519		1	7.08217e-08	2.69907e-07	0.000363151	0.000363151	0.6	1	0.358481	1.04886	331600	0.0102005	2.5	0.984771	1	0.896202	0.000363151	0.000293042	0.000362372	00:00:00	762333	2022-11-10
2022-05-25	1.45411e+07	0			0.4	2.23221	5.93166	2.18117e+08	0.343887	2.5		0	2022-05-25	0.641519		1	6.84666e-08	2.61691e-07	0.000362548	0.000362548	0.6	1	0.358481	1.04886	331900	0.0101801	2.5	0.984771	1	0.896202	0.000362548	0.000292365	0.000361767	00:00:00	762333	2022-11-10
2022-05-26	1.45411e+07	0			0.4	2.16426	5.7511	2.18117e+08	0.333419	2.5		0	2022-05-26	0.641519		1	6.61899e-08	2.53725e-07	0.000361947	0.000361947	0.6	1	0.358481	1.04886	332200	0.0101597	2.5	0.984771	1	0.896202	0.000361947	0.00029169	0.000361163	00:00:00	762333	2022-11-10
2022-05-27	1.45411e+07	0			0.4	2.09838	5.57603	2.18117e+08	0.32327	2.5		0	2022-05-27	0.641519		1	6.39889e-08	2.46001e-07	0.000361346	0.000361346	0.6	1	0.358481	1.04886	332500	0.0101394	2.5	0.984771	1	0.896202	0.000361346	0.000291016	0.00036056	00:00:00	762333	2022-11-10
2022-05-28	1.45411e+07	0			0.4	2.03451	5.4063	2.18117e+08	0.313429	2.5		0	2022-05-28	0.641519		1	6.18612e-08	2.38513e-07	0.000360747	0.000360747	0.6	1	0.358481	1.04886	332800	0.0101191	2.5	0.984771	1	0.896202	0.000360747	0.000290344	0.000359959	00:00:00	762333	2022-11-10
2022-05-29	1.45411e+07	0			0.4	1.97258	5.24173	2.18117e+08	0.303888	2.5		0	2022-05-29	0.641519		1	5.98042e-08	2.31253e-07	0.000360148	0.000360148	0.6	1	0.358481	1.04886	333100	0.0100989	2.5	0.984771	1	0.896202	0.000360148	0.000289674	0.000359358	00:00:00	762333	2022-11-10
2022-05-30	1.45411e+07	0			0.4	1.91253	5.08217	2.18117e+08	0.294638	2.5		0	2022-05-30	0.641519		1	5.78157e-08	2.24213e-07	0.000359551	0.000359551	0.6	1	0.358481	1.04886	333400	0.0100787	2.5	0.984771	1	0.896202	0.000359551	0.000289005	0.000358759	00:00:00	762333	2022-11-10
2022-05-31	1.45411e+07	0			0.4	1.85431	4.92746	2.18117e+08	0.285669	2.5		0	2022-05-31	0.641519		1	5.58934e-08	2.17388e-07	0.000358955	0.000358955	0.6	1	0.358481	1.04886	333700	0.0100585	2.5	0.984771	1	0.896202	0.000358955	0.000288338	0.000358161	00:00:00	762333	2022-11-10
2022-06-01	1.45411e+07	0			0.4	1.79787	4.77747	2.18117e+08	0.276973	2.5		0	2022-06-01	0.641519		1	5.4035e-08	2.10771e-07	0.00035836	0.00035836	0.6	1	0.358481	1.04886	334000	0.0100384	2.5	0.984771	1	0.896201	0.00035836	0.000287673	0.000357564	00:00:00	762333	2022-11-10
2022-06-02	1.45411e+07	0			0.4	1.74314	4.63204	2.18117e+08	0.268542	2.5		0	2022-06-02	0.641519		1	5.22384e-08	2.04355e-07	0.000357766	0.000357766	0.6	1	0.358481	1.04886	334300	0.0100183	2.5	0.984771	1	0.896201	0.000357766	0.000287009	0.000356968	00:00:00	762333	2022-11-10
2022-06-03	1.45411e+07	0			0.4	1.69008	4.49104	2.18117e+08	0.260367	2.5		0	2022-06-03	0.641519		1	5.05017e-08	1.98134e-07	0.000357173	0.000357173	0.6	1	0.358481	1.04886	334600	0.00999828	2.5	0.984771	1	0.896201	0.000357173	0.000286347	0.000356373	00:00:00	762333	2022-11-10
2022-06-04	1.45411e+07	0			0.4	1.63863	4.35433	2.18117e+08	0.252442	2.5		0	2022-06-04	0.641519		1	4.88227e-08	1.92103e-07	0.000356581	0.000356581	0.6	1	0.358481	1.04886	334900	0.00997828	2.5	0.984771	1	0.896201	0.000356581	0.000285686	0.000355779	00:00:00	762333	2022-11-10
2022-06-05	1.45411e+07	0			0.4	1.58875	4.22178	2.18117e+08	0.244757	2.5		0	2022-06-05	0.641519		1	4.71995e-08	1.86255e-07	0.00035599	0.00035599	0.6	1	0.358481	1.04886	335200	0.00995832	2.5	0.984771	1	0.896201	0.00035599	0.000285027	0.000355186	00:00:00	762333	2022-11-10
2022-06-06	1.45411e+07	0			0.4	1.54039	4.09327	2.18117e+08	0.237307	2.5		0	2022-06-06	0.641519		1	4.56304e-08	1.80585e-07	0.000355401	0.000355401	0.6	1	0.358481	1.04886	335500	0.00993841	2.5	0.984771	1	0.896201	0.000355401	0.00028437	0.000354594	00:00:00	762333	2022-11-10
2022-06-07	1.45411e+07	0			0.4	1.4935	3.96867	2.18117e+08	0.230083	2.5		0	2022-06-07	0.641519		1	4.41135e-08	1.75088e-07	0.000354812	0.000354812	0.6	1	0.358481	1.04886	335800	0.00991853	2.5	0.984771	1	0.896201	0.000354812	0.000283714	0.000354004	00:00:00	762333	2022-11-10
2022-06-08	1.45411e+07	0			0.4	1.44803	3.84786	2.18117e+08	0.223079	2.5		0	2022-06-08	0.641519		1	4.2647e-08	1.69759e-07	0.000354225	0.000354225	0.6	1	0.358481	1.04886	336100	0.00989869	2.5	0.984771	1	0.896201	0.000354225	0.00028306	0.000353415	00:00:00	762333	2022-11-10
2022-06-09	1.45411e+07	0			0.4	1.40396	3.73073	2.18117e+08	0.216288	2.5		0	2022-06-09	0.641519		1	4.12293e-08	1.64591e-07	0.000353638	0.000353638	0.6	1	0.358481	1.04886	336400	0.0098789	2.5	0.984771	1	0.896201	0.000353638	0.000282408	0.000352826	00:00:00	762333	2022-11-10
2022-06-10	1.45411e+07	0			0.4	1.36122	3.61717	2.18117e+08	0.209704	2.5		0	2022-06-10	0.64152		1	3.98587e-08	1.59581e-07	0.000353053	0.000353053	0.6	1	0.35848	1.04886	336700	0.00985914	2.5	0.984771	1	0.896201	0.000353053	0.000281757	0.000352239	00:00:00	762333	2022-11-10
2022-06-11	1.45411e+07	0			0.4	1.31978	3.50706	2.18117e+08	0.203321	2.5		0	2022-06-11	0.64152		1	3.85338e-08	1.54723e-07	0.000352469	0.000352469	0.6	1	0.35848	1.04886	337000	0.00983942	2.5	0.984771	1	0.896201	0.000352469	0.000281108	0.000351653	00:00:00	762333	2022-11-10
2022-06-12	1.45411e+07	0			0.4	1.27961	3.4003	2.18117e+08	0.197132	2.5		0	2022-06-12	0.64152		1	3.72529e-08	1.50013e-07	0.000351886	0.000351886	0.6	1	0.35848	1.04886	337300	0.00981974	2.5	0.984771	1	0.896201	0.000351886	0.00028046	0.000351068	00:00:00	762333	2022-11-10
2022-06-13	1.45411e+07	0			0.4	1.24066	3.29679	2.18117e+08	0.191131	2.5		0	2022-06-13	0.64152		1	3.60147e-08	1.45447e-07	0.000351304	0.000351304	0.6	1	0.35848	1.04886	337600	0.0098001	2.5	0.984771	1	0.896201	0.000351304	0.000279814	0.000350484	00:00:00	762333	2022-11-10
2022-06-14	1.45411e+07	0			0.4	1.20289	3.19644	2.18117e+08	0.185313	2.5		0	2022-06-14	0.64152		1	3.48176e-08	1.41019e-07	0.000350723	0.000350723	0.6	1	0.35848	1.04886	337900	0.0097805	2.5	0.984771	1	0.896201	0.000350723	0.000279169	0.000349901	00:00:00	762333	2022-11-10
2022-06-15	1.45411e+07	0			0.4	1.16627	3.09914	2.18117e+08	0.179672	2.5		0	2022-06-15	0.64152		1	3.36603e-08	1.36727e-07	0.000350143	0.000350143	0.6	1	0.35848	1.04886	338200	0.00976094	2.5	0.984771	1	0.896201	0.000350143	0.000278526	0.000349319	00:00:00	762333	2022-11-10
2022-06-16	1.45411e+07	0			0.4	1.13077	3.0048	2.18117e+08	0.174202	2.5		0	2022-06-16	0.64152		1	3.25415e-08	1.32565e-07	0.000349564	0.000349564	0.6	1	0.35848	1.04886	338500	0.00974142	2.5	0.984771	1	0.896201	0.000349564	0.000277885	0.000348738	00:00:00	762334	2022-11-10
2022-06-17	1.45411e+07	0			0.4	1.09635	2.91333	2.18117e+08	0.1689	2.5		0	2022-06-17	0.64152		1	3.146e-08	1.28529e-07	0.000348986	0.000348986	0.6	1	0.35848	1.04886	338800	0.00972194	2.5	0.984771	1	0.896201	0.000348986	0.000277245	0.000348159	00:00:00	762334	2022-11-10
2022-06-18	1.45411e+07	0			0.4	1.06298	2.82465	2.18117e+08	0.163758	2.5		0	2022-06-18	0.64152		1	3.04144e-08	1.24617e-07	0.00034841	0.00034841	0.6	1	0.35848	1.04886	339100	0.00970249	2.5	0.984771	1	0.896201	0.00034841	0.000276607	0.00034758	00:00:00	762334	2022-11-10
2022-06-19	1.45411e+07	0			0.4	1.03062	2.73866	2.18117e+08	0.158773	2.5		0	2022-06-19	0.64152		1	2.94036e-08	1.20823e-07	0.000347834	0.000347834	0.6	1	0.35848	1.04886	339400	0.00968309	2.5	0.984771	1	0.896201	0.000347834	0.00027597	0.000347002	00:00:00	762334	2022-11-10
2022-06-20	1.45411e+07	0			0.4	0.999246	2.6553	2.18117e+08	0.15394	2.5		0	2022-06-20	0.64152		1	2.84264e-08	1.17145e-07	0.00034726	0.00034726	0.6	1	0.35848	1.04886	339700	0.00966372	2.5	0.984771	1	0.896201	0.00034726	0.000275335	0.000346426	00:00:00	762334	2022-11-10
2022-06-21	1.45411e+07	0			0.4	0.968828	2.57447	2.18117e+08	0.149254	2.5		0	2022-06-21	0.64152		1	2.74816e-08	1.13579e-07	0.000346686	0.000346686	0.6	1	0.35848	1.04886	340000	0.00964439	2.5	0.984771	1	0.896201	0.000346686	0.000274702	0.000345851	00:00:00	762334	2022-11-10
2022-06-22	1.45411e+07	0			0.4	0.939336	2.4961	2.18117e+08	0.144711	2.5		0	2022-06-22	0.64152		1	2.65684e-08	1.10122e-07	0.000346114	0.000346114	0.6	1	0.35848	1.04886	340300	0.00962511	2.5	0.984771	1	0.896201	0.000346114	0.00027407	0.000345276	00:00:00	762334	2022-11-10
2022-06-23	1.45411e+07	0			0.4	0.910743	2.42012	2.18117e+08	0.140306	2.5		0	2022-06-23	0.64152		1	2.56854e-08	1.0677e-07	0.000345542	0.000345542	0.6	1	0.35848	1.04886	340600	0.00960585	2.5	0.984771	1	0.896201	0.000345542	0.000273439	0.000344703	00:00:00	762334	2022-11-10
2022-06-24	1.45411e+07	0			0.4	0.883019	2.34645	2.18117e+08	0.136035	2.5		0	2022-06-24	0.64152		1	2.48319e-08	1.0352e-07	0.000344972	0.000344972	0.6	1	0.35848	1.04886	340900	0.00958664	2.5	0.984771	1	0.896201	0.000344972	0.00027281	0.000344131	00:00:00	762334	2022-11-10
2022-06-25	1.45411e+07	0			0.4	0.856139	2.27502	2.18117e+08	0.131894	2.5		0	2022-06-25	0.64152		1	2.40067e-08	1.00369e-07	0.000344402	0.000344402	0.6	1	0.35848	1.04886	341200	0.00956747	2.5	0.984771	1	0.896201	0.000344402	0.000272183	0.000343559	00:00:00	762334	2022-11-10
2022-06-26	1.45411e+07	0			0.4	0.830078	2.20577	2.18117e+08	0.127879	2.5		0	2022-06-26	0.64152		1	2.3209e-08	9.73133e-08	0.000343834	0.000343834	0.6	1	0.35848	1.04886	341500	0.00954834	2.5	0.984771	1	0.896201	0.000343834	0.000271557	0.000342989	00:00:00	762334	2022-11-10
2022-06-27	1.45411e+07	0			0.4	0.80481	2.13862	2.18117e+08	0.123986	2.5		0	2022-06-27	0.64152		1	2.24378e-08	9.4351e-08	0.000343267	0.000343267	0.6	1	0.35848	1.04886	341800	0.00952924	2.5	0.984771	1	0.896201	0.000343267	0.000270933	0.00034242	00:00:00	762334	2022-11-10
2022-06-28	1.45411e+07	0			0.4	0.780311	2.07352	2.18117e+08	0.120212	2.5		0	2022-06-28	0.64152		1	2.16922e-08	9.14789e-08	0.000342701	0.000342701	0.6	1	0.35848	1.04886	342100	0.00951018	2.5	0.984771	1	0.896201	0.000342701	0.00027031	0.000341852	00:00:00	762334	2022-11-10
2022-06-29	1.45411e+07	0			0.4	0.756558	2.0104	2.18117e+08	0.116553	2.5		0	2022-06-29	0.64152		1	2.09714e-08	8.86942e-08	0.000342136	0.000342136	0.6	1	0.35848	1.04886	342400	0.00949116	2.5	0.984771	1	0.896201	0.000342136	0.000269688	0.000341285	00:00:00	762334	2022-11-10
2022-06-30	1.45411e+07	0			0.4	0.733528	1.9492	2.18117e+08	0.113005	2.5		0	2022-06-30	0.64152		1	2.02746e-08	8.59943e-08	0.000341571	0.000341571	0.6	1	0.35848	1.04886	342700	0.00947218	2.5	0.984771	1	0.896201	0.000341571	0.000269069	0.000340719	00:00:00	762334	2022-11-10
2022-07-01	1.45411e+07	0			0.4	0.711199	1.88987	2.18117e+08	0.109565	2.5		0	2022-07-01	0.64152		1	1.9601e-08	8.33766e-08	0.000341008	0.000341008	0.6	1	0.35848	1.04886	343000	0.00945323	2.5	0.984771	1	0.896201	0.000341008	0.00026845	0.000340154	00:00:00	762334	2022-11-10
2022-07-02	1.45411e+07	0			0.4	0.689549	1.83234	2.18117e+08	0.10623	2.5		0	2022-07-02	0.64152		1	1.89497e-08	8.08386e-08	0.000340446	0.000340446	0.6	1	0.35848	1.04886	343300	0.00943433	2.5	0.984771	1	0.896201	0.000340446	0.000267834	0.000339591	00:00:00	762334	2022-11-10
2022-07-03	1.45411e+07	0			0.4	0.668559	1.77656	2.18117e+08	0.102996	2.5		0	2022-07-03	0.64152		1	1.83201e-08	7.83778e-08	0.000339885	0.000339885	0.6	1	0.35848	1.04886	343600	0.00941546	2.5	0.984771	1	0.896201	0.000339885	0.000267218	0.000339028	00:00:00	762334	2022-11-10
2022-07-04	1.45411e+07	0			0.4	0.648208	1.72248	2.18117e+08	0.0998606	2.5		0	2022-07-04	0.64152		1	1.77114e-08	7.59919e-08	0.000339325	0.000339325	0.6	1	0.35848	1.04886	343900	0.00939663	2.5	0.984771	1	0.896201	0.000339325	0.000266605	0.000338466	00:00:00	762334	2022-11-10
2022-07-05	1.45411e+07	0			0.4	0.628476	1.67005	2.18117e+08	0.0968207	2.5		0	2022-07-05	0.64152		1	1.7123e-08	7.36787e-08	0.000338766	0.000338766	0.6	1	0.35848	1.04886	344200	0.00937783	2.5	0.984771	1	0.896201	0.000338766	0.000265992	0.000337905	00:00:00	762334	2022-11-10
2022-07-06	1.45411e+07	0			0.4	0.609345	1.61921	2.18117e+08	0.0938734	2.5		0	2022-07-06	0.64152		1	1.65542e-08	7.14359e-08	0.000338208	0.000338208	0.6	1	0.35848	1.04886	344500	0.00935908	2.5	0.984771	1	0.896201	0.000338208	0.000265382	0.000337345	00:00:00	762334	2022-11-10
2022-07-07	1.45411e+07	0			0.4	0.590796	1.56992	2.18117e+08	0.0910159	2.5		0	2022-07-07	0.64152		1	1.60042e-08	6.92613e-08	0.000337651	0.000337651	0.6	1	0.35848	1.04886	344800	0.00934036	2.5	0.984771	1	0.896201	0.000337651	0.000264772	0.000336787	00:00:00	762334	2022-11-10
2022-07-08	1.45411e+07	0			0.4	0.572812	1.52213	2.18117e+08	0.0882453	2.5		0	2022-07-08	0.64152		1	1.54725e-08	6.7153e-08	0.000337095	0.000337095	0.6	1	0.35848	1.04886	345100	0.00932168	2.5	0.984771	1	0.896201	0.000337095	0.000264164	0.000336229	00:00:00	762334	2022-11-10
2022-07-09	1.45411e+07	0			0.4	0.555375	1.4758	2.18117e+08	0.0855591	2.5		0	2022-07-09	0.64152		1	1.49585e-08	6.51088e-08	0.000336541	0.000336541	0.6	1	0.35848	1.04886	345400	0.00930304	2.5	0.984771	1	0.896201	0.000336541	0.000263558	0.000335672	00:00:00	762334	2022-11-10
2022-07-10	1.45411e+07	0			0.4	0.538469	1.43087	2.18117e+08	0.0829546	2.5		0	2022-07-10	0.64152		1	1.44616e-08	6.31268e-08	0.000335987	0.000335987	0.6	1	0.35848	1.04886	345700	0.00928443	2.5	0.984771	1	0.896201	0.000335987	0.000262953	0.000335117	00:00:00	762334	2022-11-10
2022-07-11	1.45411e+07	0			0.4	0.522078	1.38732	2.18117e+08	0.0804294	2.5		0	2022-07-11	0.64152		1	1.39812e-08	6.12052e-08	0.000335434	0.000335434	0.6	1	0.35848	1.04886	346000	0.00926586	2.5	0.984771	1	0.896201	0.000335434	0.00026235	0.000334562	00:00:00	762334	2022-11-10
2022-07-12	1.45411e+07	0			0.4	0.506185	1.34509	2.18117e+08	0.0779811	2.5		0	2022-07-12	0.64152		1	1.35168e-08	5.93421e-08	0.000334882	0.000334882	0.6	1	0.35848	1.04886	346300	0.00924733	2.5	0.984771	1	0.896201	0.000334882	0.000261748	0.000334009	00:00:00	762334	2022-11-10
2022-07-13	1.45411e+07	0			0.4	0.490777	1.30414	2.18117e+08	0.0756073	2.5		0	2022-07-13	0.64152		1	1.30678e-08	5.75357e-08	0.000334331	0.000334331	0.6	1	0.35848	1.04886	346600	0.00922883	2.5	0.984771	1	0.896201	0.000334331	0.000261148	0.000333456	00:00:00	762334	2022-11-10
2022-07-14	1.45411e+07	0			0.4	0.475837	1.26444	2.18117e+08	0.0733057	2.5		0	2022-07-14	0.64152		1	1.26337e-08	5.57843e-08	0.000333781	0.000333781	0.6	1	0.35848	1.04886	346900	0.00921038	2.5	0.984771	1	0.896201	0.000333781	0.000260549	0.000332905	00:00:00	762334	2022-11-10
2022-07-15	1.45411e+07	0			0.4	0.461352	1.22595	2.18117e+08	0.0710743	2.5		0	2022-07-15	0.64152		1	1.22141e-08	5.40861e-08	0.000333232	0.000333232	0.6	1	0.35848	1.04886	347200	0.00919196	2.5	0.984771	1	0.896201	0.000333232	0.000259951	0.000332354	00:00:00	762334	2022-11-10
2022-07-16	1.45411e+07	0			0.4	0.447308	1.18863	2.18117e+08	0.0689107	2.5		0	2022-07-16	0.64152		1	1.18084e-08	5.24397e-08	0.000332684	0.000332684	0.6	1	0.35848	1.04886	347500	0.00917357	2.5	0.984771	1	0.896201	0.000332684	0.000259355	0.000331804	00:00:00	762334	2022-11-10
2022-07-17	1.45411e+07	0			0.4	0.433692	1.15245	2.18117e+08	0.066813	2.5		0	2022-07-17	0.64152		1	1.14162e-08	5.08434e-08	0.000332138	0.000332138	0.6	1	0.35848	1.04886	347800	0.00915522	2.5	0.984771	1	0.896201	0.000332138	0.00025876	0.000331256	00:00:00	762334	2022-11-10
2022-07-18	1.45411e+07	0			0.4	0.42049	1.11737	2.18117e+08	0.0647792	2.5		0	2022-07-18	0.64152		1	1.1037e-08	4.92957e-08	0.000331592	0.000331592	0.6	1	0.35848	1.04886	348100	0.00913691	2.5	0.984771	1	0.896201	0.000331592	0.000258167	0.000330708	00:00:00	762334	2022-11-10
2022-07-19	1.45411e+07	0			0.4	0.40769	1.08336	2.18117e+08	0.0628073	2.5		0	2022-07-19	0.64152		1	1.06704e-08	4.77951e-08	0.000331047	0.000331047	0.6	1	0.35848	1.04886	348400	0.00911864	2.5	0.984771	1	0.896201	0.000331047	0.000257575	0.000330162	00:00:00	762334	2022-11-10
2022-07-20	1.45411e+07	0			0.4	0.39528	1.05038	2.18117e+08	0.0608954	2.5		0	2022-07-20	0.64152		1	1.0316e-08	4.63402e-08	0.000330503	0.000330503	0.6	1	0.35848	1.04886	348700	0.0091004	2.5	0.984771	1	0.896201	0.000330503	0.000256985	0.000329616	00:00:00	762334	2022-11-10
2022-07-21	1.45411e+07	0			0.4	0.383247	1.0184	2.18117e+08	0.0590417	2.5		0	2022-07-21	0.64152		1	9.97344e-09	4.49296e-08	0.00032996	0.00032996	0.6	1	0.35848	1.04886	349000	0.0090822	2.5	0.984771	1	0.896201	0.00032996	0.000256396	0.000329072	00:00:00	762334	2022-11-10
2022-07-22	1.45411e+07	0			0.4	0.371581	0.987403	2.18117e+08	0.0572444	2.5		0	2022-07-22	0.64152		1	9.64221e-09	4.35619e-08	0.000329418	0.000329418	0.6	1	0.35848	1.04886	349300	0.00906404	2.5	0.984771	1	0.896201	0.000329418	0.000255809	0.000328528	00:00:00	762334	2022-11-10
2022-07-23	1.45411e+07	0			0.4	0.36027	0.957346	2.18117e+08	0.0555019	2.5		0	2022-07-23	0.64152		1	9.32199e-09	4.22358e-08	0.000328877	0.000328877	0.6	1	0.35848	1.04886	349600	0.00904591	2.5	0.984771	1	0.896201	0.000328877	0.000255223	0.000327986	00:00:00	762334	2022-11-10
2022-07-24	1.45411e+07	0			0.4	0.349303	0.928204	2.18117e+08	0.0538123	2.5		0	2022-07-24	0.64152		1	9.01241e-09	4.09502e-08	0.000328337	0.000328337	0.6	1	0.35848	1.04886	349900	0.00902782	2.5	0.984771	1	0.896201	0.000328337	0.000254638	0.000327444	00:00:00	762334	2022-11-10
2022-07-25	1.45411e+07	0			0.4	0.33867	0.899949	2.18117e+08	0.0521743	2.5		0	2022-07-25	0.64152		1	8.71312e-09	3.97036e-08	0.000327798	0.000327798	0.6	1	0.35848	1.04886	350200	0.00900976	2.5	0.984771	1	0.896201	0.000327798	0.000254055	0.000326903	00:00:00	762334	2022-11-10
2022-07-26	1.45411e+07	0			0.4	0.328361	0.872553	2.18117e+08	0.050586	2.5		0	2022-07-26	0.64152		1	8.42378e-09	3.8495e-08	0.00032726	0.00032726	0.6	1	0.35848	1.04886	350500	0.00899174	2.5	0.984771	1	0.896201	0.00032726	0.000253473	0.000326364	00:00:00	762334	2022-11-10
2022-07-27	1.45411e+07	0			0.4	0.318365	0.845992	2.18117e+08	0.0490462	2.5		0	2022-07-27	0.64152		1	8.14405e-09	3.73232e-08	0.000326723	0.000326723	0.6	1	0.35848	1.04886	350800	0.00897376	2.5	0.984771	1	0.896201	0.000326723	0.000252893	0.000325825	00:00:00	762334	2022-11-10
2022-07-28	1.45411e+07	0			0.4	0.308674	0.82024	2.18117e+08	0.0475532	2.5		0	2022-07-28	0.64152		1	7.87361e-09	3.61871e-08	0.000326187	0.000326187	0.6	1	0.35848	1.04886	351100	0.00895581	2.5	0.984771	1	0.896201	0.000326187	0.000252314	0.000325288	00:00:00	762334	2022-11-10
2022-07-29	1.45411e+07	0			0.4	0.299278	0.795271	2.18117e+08	0.0461056	2.5		0	2022-07-29	0.64152		1	7.61216e-09	3.50855e-08	0.000325652	0.000325652	0.6	1	0.35848	1.04886	351400	0.0089379	2.5	0.984771	1	0.896201	0.000325652	0.000251736	0.000324751	00:00:00	762334	2022-11-10
2022-07-30	1.45411e+07	0			0.4	0.290167	0.771063	2.18117e+08	0.0447021	2.5		0	2022-07-30	0.64152		1	7.3594e-09	3.40175e-08	0.000325118	0.000325118	0.6	1	0.35848	1.04886	351700	0.00892002	2.5	0.984771	1	0.896201	0.000325118	0.00025116	0.000324215	00:00:00	762334	2022-11-10
2022-07-31	1.45411e+07	0			0.4	0.281334	0.747591	2.18117e+08	0.0433414	2.5		0	2022-07-31	0.64152		1	7.11503e-09	3.2982e-08	0.000324585	0.000324585	0.6	1	0.35848	1.04886	352000	0.00890218	2.5	0.984771	1	0.896201	0.000324585	0.000250585	0.000323681	00:00:00	762334	2022-11-10
2022-08-01	1.45411e+07	0			0.4	0.27277	0.724834	2.18117e+08	0.042022	2.5		0	2022-08-01	0.64152		1	6.87879e-09	3.1978e-08	0.000324053	0.000324053	0.6	1	0.35848	1.04886	352300	0.00888438	2.5	0.984771	1	0.896201	0.000324053	0.000250012	0.000323147	00:00:00	762334	2022-11-10
2022-08-02	1.45411e+07	0			0.4	0.264467	0.702769	2.18117e+08	0.0407428	2.5		0	2022-08-02	0.64152		1	6.65039e-09	3.10045e-08	0.000323522	0.000323522	0.6	1	0.35848	1.04886	352600	0.00886661	2.5	0.984771	1	0.896201	0.000323522	0.00024944	0.000322614	00:00:00	762334	2022-11-10
2022-08-03	1.45411e+07	0			0.4	0.256417	0.681377	2.18117e+08	0.0395026	2.5		0	2022-08-03	0.64152		1	6.42958e-09	3.00607e-08	0.000322991	0.000322991	0.6	1	0.35848	1.04886	352900	0.00884888	2.5	0.984771	1	0.896201	0.000322991	0.000248869	0.000322082	00:00:00	762334	2022-11-10
2022-08-04	1.45411e+07	0			0.4	0.248611	0.660635	2.18117e+08	0.0383001	2.5		0	2022-08-04	0.64152		1	6.21611e-09	2.91457e-08	0.000322462	0.000322462	0.6	1	0.35848	1.04886	353200	0.00883118	2.5	0.984771	1	0.896201	0.000322462	0.0002483	0.000321552	00:00:00	762334	2022-11-10
2022-08-05	1.45411e+07	0			0.4	0.241043	0.640525	2.18117e+08	0.0371342	2.5		0	2022-08-05	0.64152		1	6.00973e-09	2.82584e-08	0.000321934	0.000321934	0.6	1	0.35848	1.04886	353500	0.00881352	2.5	0.984771	1	0.896201	0.000321934	0.000247732	0.000321022	00:00:00	762334	2022-11-10
2022-08-06	1.45411e+07	0			0.4	0.233706	0.621027	2.18117e+08	0.0360038	2.5		0	2022-08-06	0.64152		1	5.8102e-09	2.73982e-08	0.000321406	0.000321406	0.6	1	0.35848	1.04886	353800	0.00879589	2.5	0.984771	1	0.896201	0.000321406	0.000247165	0.000320493	00:00:00	762334	2022-11-10
2022-08-07	1.45411e+07	0			0.4	0.226592	0.602122	2.18117e+08	0.0349079	2.5		0	2022-08-07	0.64152		1	5.61731e-09	2.65642e-08	0.00032088	0.00032088	0.6	1	0.35848	1.04886	354100	0.0087783	2.5	0.984771	1	0.896201	0.00032088	0.0002466	0.000319965	00:00:00	762334	2022-11-10
2022-08-08	1.45411e+07	0			0.4	0.219694	0.583793	2.18117e+08	0.0338452	2.5		0	2022-08-08	0.64152		1	5.43082e-09	2.57556e-08	0.000320355	0.000320355	0.6	1	0.35848	1.04886	354400	0.00876074	2.5	0.984771	1	0.896201	0.000320355	0.000246037	0.000319438	00:00:00	762334	2022-11-10
2022-08-09	1.45411e+07	0			0.4	0.213006	0.566022	2.18117e+08	0.032815	2.5		0	2022-08-09	0.64152		1	5.25052e-09	2.49716e-08	0.00031983	0.00031983	0.6	1	0.35848	1.04886	354700	0.00874322	2.5	0.984771	1	0.896201	0.00031983	0.000245474	0.000318912	00:00:00	762334	2022-11-10
2022-08-10	1.45411e+07	0			0.4	0.206522	0.548792	2.18117e+08	0.0318161	2.5		0	2022-08-10	0.64152		1	5.07622e-09	2.42114e-08	0.000319306	0.000319306	0.6	1	0.35848	1.04886	355000	0.00872573	2.5	0.984771	1	0.896201	0.000319306	0.000244913	0.000318387	00:00:00	762334	2022-11-10
2022-08-11	1.45411e+07	0			0.4	0.200236	0.532086	2.18117e+08	0.0308476	2.5		0	2022-08-11	0.64152		1	4.90771e-09	2.34744e-08	0.000318784	0.000318784	0.6	1	0.35848	1.04886	355300	0.00870828	2.5	0.984771	1	0.896201	0.000318784	0.000244353	0.000317863	00:00:00	762334	2022-11-10
2022-08-12	1.45411e+07	0			0.4	0.19414	0.515889	2.18117e+08	0.0299085	2.5		0	2022-08-12	0.64152		1	4.74479e-09	2.27598e-08	0.000318262	0.000318262	0.6	1	0.35848	1.04886	355600	0.00869087	2.5	0.984771	1	0.896201	0.000318262	0.000243795	0.00031734	00:00:00	762334	2022-11-10
2022-08-13	1.45411e+07	0			0.4	0.18823	0.500185	2.18117e+08	0.0289981	2.5		0	2022-08-13	0.64152		1	4.58728e-09	2.2067e-08	0.000317741	0.000317741	0.6	1	0.35848	1.04886	355900	0.00867348	2.5	0.984771	1	0.896201	0.000317741	0.000243238	0.000316818	00:00:00	762334	2022-11-10
2022-08-14	1.45411e+07	0			0.4	0.182501	0.484959	2.18117e+08	0.0281154	2.5		0	2022-08-14	0.64152		1	4.43501e-09	2.13953e-08	0.000317222	0.000317222	0.6	1	0.35848	1.04886	356200	0.00865614	2.5	0.984771	1	0.896201	0.000317222	0.000242682	0.000316296	00:00:00	762334	2022-11-10
2022-08-15	1.45411e+07	0			0.4	0.176945	0.470197	2.18117e+08	0.0272595	2.5		0	2022-08-15	0.64152		1	4.28779e-09	2.0744e-08	0.000316703	0.000316703	0.6	1	0.35848	1.04886	356500	0.00863883	2.5	0.984771	1	0.896201	0.000316703	0.000242128	0.000315776	00:00:00	762334	2022-11-10
2022-08-16	1.45411e+07	0			0.4	0.171559	0.455884	2.18117e+08	0.0264297	2.5		0	2022-08-16	0.64152		1	4.14547e-09	2.01125e-08	0.000316185	0.000316185	0.6	1	0.35848	1.04886	356800	0.00862155	2.5	0.984771	1	0.896201	0.000316185	0.000241575	0.000315257	00:00:00	762334	2022-11-10
2022-08-17	1.45411e+07	0			0.4	0.166336	0.442006	2.18117e+08	0.0256252	2.5		0	2022-08-17	0.64152		1	4.00787e-09	1.95003e-08	0.000315668	0.000315668	0.6	1	0.35848	1.04886	357100	0.0086043	2.5	0.984771	1	0.896201	0.000315668	0.000241023	0.000314738	00:00:00	762334	2022-11-10
2022-08-18	1.45411e+07	0			0.4	0.161273	0.428551	2.18117e+08	0.0248451	2.5		0	2022-08-18	0.64152		1	3.87484e-09	1.89067e-08	0.000315152	0.000315152	0.6	1	0.35848	1.04886	357400	0.0085871	2.5	0.984771	1	0.896201	0.000315152	0.000240473	0.000314221	00:00:00	762334	2022-11-10
2022-08-19	1.45411e+07	0			0.4	0.156364	0.415506	2.18117e+08	0.0240888	2.5		0	2022-08-19	0.64152		1	3.74623e-09	1.83311e-08	0.000314637	0.000314637	0.6	1	0.35848	1.04886	357700	0.00856992	2.5	0.984771	1	0.896201	0.000314637	0.000239924	0.000313704	00:00:00	762334	2022-11-10
2022-08-20	1.45411e+07	0			0.4	0.151604	0.402858	2.18117e+08	0.0233556	2.5		0	2022-08-20	0.64152		1	3.62189e-09	1.77731e-08	0.000314123	0.000314123	0.6	1	0.35848	1.04886	358000	0.00855278	2.5	0.984771	1	0.896201	0.000314123	0.000239377	0.000313189	00:00:00	762334	2022-11-10
2022-08-21	1.45411e+07	0			0.4	0.146989	0.390594	2.18117e+08	0.0226446	2.5		0	2022-08-21	0.64152		1	3.50168e-09	1.72321e-08	0.000313609	0.000313609	0.6	1	0.35848	1.04886	358300	0.00853568	2.5	0.984771	1	0.896201	0.000313609	0.00023883	0.000312674	00:00:00	762334	2022-11-10
2022-08-22	1.45411e+07	0			0.4	0.142515	0.378704	2.18117e+08	0.0219553	2.5		0	2022-08-22	0.64152		1	3.38546e-09	1.67075e-08	0.000313097	0.000313097	0.6	1	0.35848	1.04886	358600	0.00851861	2.5	0.984771	1	0.896201	0.000313097	0.000238285	0.00031216	00:00:00	762334	2022-11-10
2022-08-23	1.45411e+07	0			0.4	0.138176	0.367176	2.18117e+08	0.0212869	2.5		0	2022-08-23	0.64152		1	3.2731e-09	1.6199e-08	0.000312586	0.000312586	0.6	1	0.35848	1.04886	358900	0.00850157	2.5	0.984771	1	0.896201	0.000312586	0.000237741	0.000311647	00:00:00	762334	2022-11-10
2022-08-24	1.45411e+07	0			0.4	0.13397	0.355999	2.18117e+08	0.020639	2.5		0	2022-08-24	0.64152		1	3.16447e-09	1.57059e-08	0.000312075	0.000312075	0.6	1	0.35848	1.04886	359200	0.00848457	2.5	0.984771	1	0.896201	0.000312075	0.000237199	0.000311135	00:00:00	762334	2022-11-10
2022-08-25	1.45411e+07	0			0.4	0.129892	0.345162	2.18117e+08	0.0200107	2.5		0	2022-08-25	0.64152		1	3.05945e-09	1.52278e-08	0.000311565	0.000311565	0.6	1	0.35848	1.04886	359500	0.0084676	2.5	0.984771	1	0.896201	0.000311565	0.000236658	0.000310624	00:00:00	762334	2022-11-10
2022-08-26	1.45411e+07	0			0.4	0.125938	0.334655	2.18117e+08	0.0194015	2.5		0	2022-08-26	0.64152		1	2.95792e-09	1.47642e-08	0.000311057	0.000311057	0.6	1	0.35848	1.04886	359800	0.00845066	2.5	0.984771	1	0.896201	0.000311057	0.000236118	0.000310114	00:00:00	762334	2022-11-10
2022-08-27	1.45411e+07	0			0.4	0.122104	0.324468	2.18117e+08	0.018811	2.5		0	2022-08-27	0.64152		1	2.85976e-09	1.43148e-08	0.000310549	0.000310549	0.6	1	0.35848	1.04886	360100	0.00843376	2.5	0.984771	1	0.896201	0.000310549	0.00023558	0.000309605	00:00:00	762334	2022-11-10
2022-08-28	1.45411e+07	0			0.4	0.118387	0.314591	2.18117e+08	0.0182383	2.5		0	2022-08-28	0.64152		1	2.76486e-09	1.3879e-08	0.000310042	0.000310042	0.6	1	0.35848	1.04886	360400	0.00841689	2.5	0.984771	1	0.896201	0.000310042	0.000235042	0.000309097	00:00:00	762334	2022-11-10
2022-08-29	1.45411e+07	0			0.4	0.114784	0.305015	2.18117e+08	0.0176831	2.5		0	2022-08-29	0.64152		1	2.67311e-09	1.34565e-08	0.000309536	0.000309536	0.6	1	0.35848	1.04886	360700	0.00840006	2.5	0.984771	1	0.896201	0.000309536	0.000234506	0.00030859	00:00:00	762334	2022-11-10
2022-08-30	1.45411e+07	0			0.4	0.11129	0.29573	2.18117e+08	0.0171449	2.5		0	2022-08-30	0.64152		1	2.5844e-09	1.30469e-08	0.000309031	0.000309031	0.6	1	0.35848	1.04886	361000	0.00838326	2.5	0.984771	1	0.896201	0.000309031	0.000233972	0.000308083	00:00:00	762334	2022-11-10
2022-08-31	1.45411e+07	0			0.4	0.107902	0.286728	2.18117e+08	0.016623	2.5		0	2022-08-31	0.64152		1	2.49864e-09	1.26498e-08	0.000308527	0.000308527	0.6	1	0.35848	1.04886	361300	0.00836649	2.5	0.984771	1	0.896201	0.000308527	0.000233438	0.000307578	00:00:00	762334	2022-11-10
2022-09-01	1.45411e+07	0			0.4	0.104617	0.278	2.18117e+08	0.0161169	2.5		0	2022-09-01	0.64152		1	2.41573e-09	1.22647e-08	0.000308024	0.000308024	0.6	1	0.35848	1.04886	361600	0.00834976	2.5	0.984771	1	0.896201	0.000308024	0.000232906	0.000307073	00:00:00	762334	2022-11-10
2022-09-02	1.45411e+07	0			0.4	0.101433	0.269537	2.18117e+08	0.0156263	2.5		0	2022-09-02	0.64152		1	2.33557e-09	1.18913e-08	0.000307522	0.000307522	0.6	1	0.35848	1.04886	361900	0.00833306	2.5	0.984771	1	0.896201	0.000307522	0.000232375	0.00030657	00:00:00	762334	2022-11-10
2022-09-03	1.45411e+07	0			0.4	0.0983449	0.261332	2.18117e+08	0.0151507	2.5		0	2022-09-03	0.64152		1	2.25807e-09	1.15294e-08	0.00030702	0.00030702	0.6	1	0.35848	1.04886	362200	0.00831639	2.5	0.984771	1	0.896201	0.00030702	0.000231846	0.000306067	00:00:00	762334	2022-11-10
2022-09-04	1.45411e+07	0			0.4	0.0953512	0.253377	2.18117e+08	0.0146895	2.5		0	2022-09-04	0.64152		1	2.18315e-09	1.11784e-08	0.00030652	0.00030652	0.6	1	0.35848	1.04886	362500	0.00829976	2.5	0.984771	1	0.896201	0.00030652	0.000231318	0.000305565	00:00:00	762334	2022-11-10
2022-09-05	1.45411e+07	0			0.4	0.0924486	0.245664	2.18117e+08	0.0142423	2.5		0	2022-09-05	0.64152		1	2.11071e-09	1.08381e-08	0.00030602	0.00030602	0.6	1	0.35848	1.04886	362800	0.00828316	2.5	0.984771	1	0.896201	0.00030602	0.000230791	0.000305064	00:00:00	762334	2022-11-10
2022-09-06	1.45411e+07	0			0.4	0.0896344	0.238186	2.18117e+08	0.0138088	2.5		0	2022-09-06	0.64152		1	2.04068e-09	1.05082e-08	0.000305521	0.000305521	0.6	1	0.35848	1.04886	363100	0.00826659	2.5	0.984771	1	0.896201	0.000305521	0.000230265	0.000304564	00:00:00	762334	2022-11-10
2022-09-07	1.45411e+07	0			0.4	0.0869059	0.230935	2.18117e+08	0.0133884	2.5		0	2022-09-07	0.64152		1	1.97297e-09	1.01883e-08	0.000305024	0.000305024	0.6	1	0.35848	1.04886	363400	0.00825006	2.5	0.984771	1	0.896201	0.000305024	0.00022974	0.000304065	00:00:00	762334	2022-11-10
2022-09-08	1.45411e+07	0			0.4	0.0842604	0.223905	2.18117e+08	0.0129809	2.5		0	2022-09-08	0.64152		1	1.90752e-09	9.87818e-09	0.000304527	0.000304527	0.6	1	0.35848	1.04886	363700	0.00823356	2.5	0.984771	1	0.896201	0.000304527	0.000229217	0.000303567	00:00:00	762334	2022-11-10
2022-09-09	1.45411e+07	0			0.4	0.0816955	0.21709	2.18117e+08	0.0125857	2.5		0	2022-09-09	0.64152		1	1.84423e-09	9.57748e-09	0.000304031	0.000304031	0.6	1	0.35848	1.04886	364000	0.00821709	2.5	0.984771	1	0.896201	0.000304031	0.000228695	0.00030307	00:00:00	762334	2022-11-10
2022-09-10	1.45411e+07	0			0.4	0.0792086	0.210481	2.18117e+08	0.0122026	2.5		0	2022-09-10	0.64152		1	1.78304e-09	9.28594e-09	0.000303536	0.000303536	0.6	1	0.35848	1.04886	364300	0.00820066	2.5	0.984771	1	0.896201	0.000303536	0.000228175	0.000302573	00:00:00	762334	2022-11-10
2022-09-11	1.45411e+07	0			0.4	0.0767974	0.204074	2.18117e+08	0.0118311	2.5		0	2022-09-11	0.64152		1	1.72389e-09	9.00327e-09	0.000303041	0.000303041	0.6	1	0.35848	1.04886	364600	0.00818426	2.5	0.984771	1	0.896201	0.000303041	0.000227655	0.000302078	00:00:00	762334	2022-11-10
2022-09-12	1.45411e+07	0			0.4	0.0744597	0.197862	2.18117e+08	0.011471	2.5		0	2022-09-12	0.64152		1	1.6667e-09	8.7292e-09	0.000302548	0.000302548	0.6	1	0.35848	1.04886	364900	0.00816789	2.5	0.984771	1	0.896201	0.000302548	0.000227137	0.000301583	00:00:00	762334	2022-11-10
2022-09-13	1.45411e+07	0			0.4	0.0721931	0.191839	2.18117e+08	0.0111218	2.5		0	2022-09-13	0.64152		1	1.61141e-09	8.46348e-09	0.000302055	0.000302055	0.6	1	0.35848	1.04886	365200	0.00815155	2.5	0.984771	1	0.896201	0.000302055	0.00022662	0.000301089	00:00:00	762334	2022-11-10
2022-09-14	1.45411e+07	0			0.4	0.0699955	0.185999	2.18117e+08	0.0107832	2.5		0	2022-09-14	0.64152		1	1.55795e-09	8.20584e-09	0.000301564	0.000301564	0.6	1	0.35848	1.04886	365500	0.00813525	2.5	0.984771	1	0.896201	0.000301564	0.000226104	0.000300597	00:00:00	762334	2022-11-10
2022-09-15	1.45411e+07	0			0.4	0.0678647	0.180337	2.18117e+08	0.010455	2.5		0	2022-09-15	0.64152		1	1.50627e-09	7.95605e-09	0.000301073	0.000301073	0.6	1	0.35848	1.04886	365800	0.00811898	2.5	0.984771	1	0.896201	0.000301073	0.00022559	0.000300105	00:00:00	762334	2022-11-10
2022-09-16	1.45411e+07	0			0.4	0.0657989	0.174848	2.18117e+08	0.0101367	2.5		0	2022-09-16	0.64152		1	1.4563e-09	7.71386e-09	0.000300583	0.000300583	0.6	1	0.35848	1.04886	366100	0.00810274	2.5	0.984771	1	0.896201	0.000300583	0.000225076	0.000299613	00:00:00	762334	2022-11-10
2022-09-17	1.45411e+07	0			0.4	0.0637959	0.169525	2.18117e+08	0.00982817	2.5		0	2022-09-17	0.64152		1	1.40799e-09	7.47905e-09	0.000300094	0.000300094	0.6	1	0.35848	1.04886	366400	0.00808654	2.5	0.984771	1	0.896201	0.000300094	0.000224564	0.000299123	00:00:00	762334	2022-11-10
2022-09-18	1.45411e+07	0			0.4	0.0618539	0.164365	2.18117e+08	0.00952899	2.5		0	2022-09-18	0.64152		1	1.36129e-09	7.25138e-09	0.000299606	0.000299606	0.6	1	0.35848	1.04886	366700	0.00807036	2.5	0.984771	1	0.896201	0.000299606	0.000224053	0.000298634	00:00:00	762334	2022-11-10
2022-09-19	1.45411e+07	0			0.4	0.0599711	0.159361	2.18117e+08	0.00923892	2.5		0	2022-09-19	0.64152		1	1.31613e-09	7.03064e-09	0.000299119	0.000299119	0.6	1	0.35848	1.04886	367000	0.00805422	2.5	0.984771	1	0.896201	0.000299119	0.000223544	0.000298145	00:00:00	762334	2022-11-10
2022-09-20	1.45411e+07	0			0.4	0.0581455	0.15451	2.18117e+08	0.00895768	2.5		0	2022-09-20	0.64152		1	1.27248e-09	6.81663e-09	0.000298632	0.000298632	0.6	1	0.35848	1.04886	367300	0.00803811	2.5	0.984771	1	0.896201	0.000298632	0.000223035	0.000297658	00:00:00	762334	2022-11-10
2022-09-21	1.45411e+07	0			0.4	0.0563755	0.149807	2.18117e+08	0.008685	2.5		0	2022-09-21	0.64152		1	1.23027e-09	6.60912e-09	0.000298147	0.000298147	0.6	1	0.35848	1.04886	367600	0.00802204	2.5	0.984771	1	0.896201	0.000298147	0.000222528	0.000297171	00:00:00	762334	2022-11-10
2022-09-22	1.45411e+07	0			0.4	0.0546594	0.145247	2.18117e+08	0.00842063	2.5		0	2022-09-22	0.64152		1	1.18946e-09	6.40794e-09	0.000297662	0.000297662	0.6	1	0.35848	1.04886	367900	0.00800599	2.5	0.984771	1	0.896201	0.000297662	0.000222022	0.000296685	00:00:00	762334	2022-11-10
2022-09-23	1.45411e+07	0			0.4	0.0529955	0.140825	2.18117e+08	0.0081643	2.5		0	2022-09-23	0.64152		1	1.15001e-09	6.21287e-09	0.000297179	0.000297179	0.6	1	0.35848	1.04886	368200	0.00798998	2.5	0.984771	1	0.896201	0.000297179	0.000221518	0.0002962	00:00:00	762334	2022-11-10
2022-09-24	1.45411e+07	0			0.4	0.0513823	0.136538	2.18117e+08	0.00791577	2.5		0	2022-09-24	0.64152		1	1.11187e-09	6.02375e-09	0.000296696	0.000296696	0.6	1	0.35848	1.04886	368500	0.007974	2.5	0.984771	1	0.896201	0.000296696	0.000221014	0.000295716	00:00:00	762334	2022-11-10
2022-09-25	1.45411e+07	0			0.4	0.0498182	0.132382	2.18117e+08	0.00767481	2.5		0	2022-09-25	0.64152		1	1.07499e-09	5.84038e-09	0.000296214	0.000296214	0.6	1	0.35848	1.04886	368800	0.00795805	2.5	0.984771	1	0.896201	0.000296214	0.000220512	0.000295233	00:00:00	762334	2022-11-10
2022-09-26	1.45411e+07	0			0.4	0.0483017	0.128352	2.18117e+08	0.00744118	2.5		0	2022-09-26	0.64152		1	1.03934e-09	5.6626e-09	0.000295732	0.000295732	0.6	1	0.35848	1.04886	369100	0.00794214	2.5	0.984771	1	0.896201	0.000295732	0.000220011	0.000294751	00:00:00	762334	2022-11-10
2022-09-27	1.45411e+07	0			0.4	0.0468313	0.124445	2.18117e+08	0.00721467	2.5		0	2022-09-27	0.64152		1	1.00486e-09	5.49022e-09	0.000295252	0.000295252	0.6	1	0.35848	1.04886	369400	0.00792625	2.5	0.984771	1	0.896201	0.000295252	0.000219511	0.000294269	00:00:00	762334	2022-11-10
2022-09-28	1.45411e+07	0			0.4	0.0454058	0.120657	2.18117e+08	0.00699505	2.5		0	2022-09-28	0.64152		1	9.71539e-10	5.3231e-09	0.000294773	0.000294773	0.6	1	0.35848	1.04886	369700	0.0079104	2.5	0.984771	1	0.896201	0.000294773	0.000219012	0.000293789	00:00:00	762334	2022-11-10
2022-09-29	1.45411e+07	0			0.4	0.0440236	0.116984	2.18117e+08	0.00678211	2.5		0	2022-09-29	0.64152		1	9.39318e-10	5.16106e-09	0.000294294	0.000294294	0.6	1	0.35848	1.04886	370000	0.00789458	2.5	0.984771	1	0.896201	0.000294294	0.000218514	0.000293309	00:00:00	762334	2022-11-10
2022-09-30	1.45411e+07	0			0.4	0.0426835	0.113423	2.18117e+08	0.00657566	2.5		0	2022-09-30	0.64152		1	9.08167e-10	5.00395e-09	0.000293816	0.000293816	0.6	1	0.35848	1.04886	370300	0.00787879	2.5	0.984771	1	0.896201	0.000293816	0.000218018	0.00029283	00:00:00	762334	2022-11-10
2022-10-01	1.45411e+07	0			0.4	0.0413842	0.10997	2.18117e+08	0.00637549	2.5		0	2022-10-01	0.64152		1	8.78049e-10	4.85163e-09	0.000293339	0.000293339	0.6	1	0.35848	1.04886	370600	0.00786303	2.5	0.984771	1	0.896201	0.000293339	0.000217523	0.000292352	00:00:00	762334	2022-11-10
2022-10-02	1.45411e+07	0			0.4	0.0401244	0.106623	2.18117e+08	0.00618142	2.5		0	2022-10-02	0.64152		1	8.48931e-10	4.70394e-09	0.000292863	0.000292863	0.6	1	0.35848	1.04886	370900	0.00784731	2.5	0.984771	1	0.896201	0.000292863	0.000217029	0.000291875	00:00:00	762334	2022-11-10
2022-10-03	1.45411e+07	0			0.4	0.038903	0.103377	2.18117e+08	0.00599325	2.5		0	2022-10-03	0.64152		1	8.20779e-10	4.56075e-09	0.000292388	0.000292388	0.6	1	0.35848	1.04886	371200	0.00783161	2.5	0.984771	1	0.896201	0.000292388	0.000216536	0.000291398	00:00:00	762334	2022-11-10
2022-10-04	1.45411e+07	0			0.4	0.0377187	0.10023	2.18117e+08	0.00581081	2.5		0	2022-10-04	0.64152		1	7.93561e-10	4.42192e-09	0.000291914	0.000291914	0.6	1	0.35848	1.04886	371500	0.00781595	2.5	0.984771	1	0.896201	0.000291914	0.000216044	0.000290923	00:00:00	762334	2022-11-10
2022-10-05	1.45411e+07	0			0.4	0.0365706	0.0971791	2.18117e+08	0.00563393	2.5		0	2022-10-05	0.64152		1	7.67246e-10	4.28731e-09	0.00029144	0.00029144	0.6	1	0.35848	1.04886	371800	0.00780032	2.5	0.984771	1	0.896201	0.00029144	0.000215554	0.000290448	00:00:00	762334	2022-11-10
2022-10-06	1.45411e+07	0			0.4	0.0354573	0.0942209	2.18117e+08	0.00546243	2.5		0	2022-10-06	0.64152		1	7.41804e-10	4.1568e-09	0.000290967	0.000290967	0.6	1	0.35848	1.04886	372100	0.00778472	2.5	0.984771	1	0.896201	0.000290967	0.000215064	0.000289974	00:00:00	762334	2022-11-10
2022-10-07	1.45411e+07	0			0.4	0.034378	0.0913527	2.18117e+08	0.00529615	2.5		0	2022-10-07	0.64152		1	7.17206e-10	4.03027e-09	0.000290495	0.000290495	0.6	1	0.35848	1.04886	372400	0.00776915	2.5	0.984771	1	0.896201	0.000290495	0.000214576	0.000289501	00:00:00	762334	2022-11-10
2022-10-08	1.45411e+07	0			0.4	0.0333315	0.0885719	2.18117e+08	0.00513493	2.5		0	2022-10-08	0.64152		1	6.93425e-10	3.90758e-09	0.000290024	0.000290024	0.6	1	0.35848	1.04886	372700	0.00775361	2.5	0.984771	1	0.896201	0.000290024	0.000214089	0.000289029	00:00:00	762334	2022-11-10
2022-10-09	1.45411e+07	0			0.4	0.0323169	0.0858757	2.18117e+08	0.00497862	2.5		0	2022-10-09	0.64152		1	6.70432e-10	3.78863e-09	0.000289554	0.000289554	0.6	1	0.35848	1.04886	373000	0.0077381	2.5	0.984771	1	0.896201	0.000289554	0.000213603	0.000288558	00:00:00	762334	2022-11-10
2022-10-10	1.45411e+07	0			0.4	0.0313331	0.0832616	2.18117e+08	0.00482706	2.5		0	2022-10-10	0.64152		1	6.48202e-10	3.6733e-09	0.000289085	0.000289085	0.6	1	0.35848	1.04886	373300	0.00772263	2.5	0.984771	1	0.896201	0.000289085	0.000213119	0.000288087	00:00:00	762334	2022-11-10
2022-10-11	1.45411e+07	0			0.4	0.0303793	0.080727	2.18117e+08	0.00468012	2.5		0	2022-10-11	0.64152		1	6.2671e-10	3.56149e-09	0.000288616	0.000288616	0.6	1	0.35848	1.04886	373600	0.00770718	2.5	0.984771	1	0.896201	0.000288616	0.000212635	0.000287618	00:00:00	762334	2022-11-10
2022-10-12	1.45411e+07	0			0.4	0.0294545	0.0782696	2.18117e+08	0.00453766	2.5		0	2022-10-12	0.64152		1	6.0593e-10	3.45307e-09	0.000288149	0.000288149	0.6	1	0.35848	1.04886	373900	0.00769177	2.5	0.984771	1	0.896201	0.000288149	0.000212153	0.000287149	00:00:00	762334	2022-11-10
2022-10-13	1.45411e+07	0			0.4	0.0285579	0.075887	2.18117e+08	0.00439953	2.5		0	2022-10-13	0.64152		1	5.8584e-10	3.34796e-09	0.000287682	0.000287682	0.6	1	0.35848	1.04886	374200	0.00767638	2.5	0.984771	1	0.896201	0.000287682	0.000211672	0.000286681	00:00:00	762334	2022-11-10
2022-10-14	1.45411e+07	0			0.4	0.0276886	0.073577	2.18117e+08	0.0042656	2.5		0	2022-10-14	0.64152		1	5.66417e-10	3.24604e-09	0.000287216	0.000287216	0.6	1	0.35848	1.04886	374500	0.00766103	2.5	0.984771	1	0.896201	0.000287216	0.000211191	0.000286214	00:00:00	762334	2022-11-10
2022-10-15	1.45411e+07	0			0.4	0.0268457	0.0713372	2.18117e+08	0.00413575	2.5		0	2022-10-15	0.64152		1	5.47638e-10	3.14723e-09	0.000286751	0.000286751	0.6	1	0.35848	1.04886	374800	0.00764571	2.5	0.984771	1	0.896201	0.000286751	0.000210713	0.000285748	00:00:00	762334	2022-11-10
2022-10-16	1.45411e+07	0			0.4	0.0260285	0.0691657	2.18117e+08	0.00400986	2.5		0	2022-10-16	0.64152		1	5.29481e-10	3.05143e-09	0.000286286	0.000286286	0.6	1	0.35848	1.04886	375100	0.00763042	2.5	0.984771	1	0.896201	0.000286286	0.000210235	0.000285282	00:00:00	762334	2022-11-10
2022-10-17	1.45411e+07	0			0.4	0.0252362	0.0670602	2.18117e+08	0.0038878	2.5		0	2022-10-17	0.64152		1	5.11927e-10	2.95854e-09	0.000285823	0.000285823	0.6	1	0.35848	1.04886	375400	0.00761516	2.5	0.984771	1	0.896201	0.000285823	0.000209758	0.000284818	00:00:00	762334	2022-11-10
2022-10-18	1.45411e+07	0			0.4	0.024468	0.0650189	2.18117e+08	0.00376945	2.5		0	2022-10-18	0.64152		1	4.94956e-10	2.86848e-09	0.00028536	0.00028536	0.6	1	0.35848	1.04886	375700	0.00759993	2.5	0.984771	1	0.896201	0.00028536	0.000209282	0.000284354	00:00:00	762334	2022-11-10
2022-10-19	1.45411e+07	0			0.4	0.0237232	0.0630396	2.18117e+08	0.0036547	2.5		0	2022-10-19	0.64152		1	4.78547e-10	2.78116e-09	0.000284898	0.000284898	0.6	1	0.35848	1.04886	376000	0.00758473	2.5	0.984771	1	0.896201	0.000284898	0.000208808	0.000283891	00:00:00	762334	2022-11-10
2022-10-20	1.45411e+07	0			0.4	0.023001	0.0611207	2.18117e+08	0.00354345	2.5		0	2022-10-20	0.64152		1	4.62683e-10	2.6965e-09	0.000284437	0.000284437	0.6	1	0.35848	1.04886	376300	0.00756956	2.5	0.984771	1	0.896201	0.000284437	0.000208335	0.000283429	00:00:00	762334	2022-11-10
2022-10-21	1.45411e+07	0			0.4	0.0223008	0.0592601	2.18117e+08	0.00343559	2.5		0	2022-10-21	0.64152		1	4.47344e-10	2.61442e-09	0.000283977	0.000283977	0.6	1	0.35848	1.04886	376600	0.00755442	2.5	0.984771	1	0.896201	0.000283977	0.000207863	0.000282968	00:00:00	762334	2022-11-10
2022-10-22	1.45411e+07	0			0.4	0.021622	0.0574562	2.18117e+08	0.00333101	2.5		0	2022-10-22	0.64152		1	4.32515e-10	2.53483e-09	0.000283517	0.000283517	0.6	1	0.35848	1.04886	376900	0.00753931	2.5	0.984771	1	0.896201	0.000283517	0.000207392	0.000282507	00:00:00	762334	2022-11-10
2022-10-23	1.45411e+07	0			0.4	0.0209638	0.0557072	2.18117e+08	0.00322961	2.5		0	2022-10-23	0.64152		1	4.18177e-10	2.45767e-09	0.000283058	0.000283058	0.6	1	0.35848	1.04886	377200	0.00752423	2.5	0.984771	1	0.896201	0.000283058	0.000206922	0.000282047	00:00:00	762334	2022-11-10
2022-10-24	1.45411e+07	0			0.4	0.0203256	0.0540114	2.18117e+08	0.0031313	2.5		0	2022-10-24	0.64152		1	4.04315e-10	2.38286e-09	0.000282601	0.000282601	0.6	1	0.35848	1.04886	377500	0.00750918	2.5	0.984771	1	0.896201	0.000282601	0.000206453	0.000281589	00:00:00	762334	2022-11-10
2022-10-25	1.45411e+07	0			0.4	0.0197069	0.0523673	2.18117e+08	0.00303598	2.5		0	2022-10-25	0.64152		1	3.90913e-10	2.31032e-09	0.000282143	0.000282143	0.6	1	0.35848	1.04886	377800	0.00749416	2.5	0.984771	1	0.896201	0.000282143	0.000205985	0.000281131	00:00:00	762334	2022-11-10
2022-10-26	1.45411e+07	0			0.4	0.019107	0.0507732	2.18117e+08	0.00294356	2.5		0	2022-10-26	0.64152		1	3.77955e-10	2.23999e-09	0.000281687	0.000281687	0.6	1	0.35848	1.04886	378100	0.00747917	2.5	0.984771	1	0.896201	0.000281687	0.000205519	0.000280673	00:00:00	762334	2022-11-10
2022-10-27	1.45411e+07	0			0.4	0.0185254	0.0492276	2.18117e+08	0.00285395	2.5		0	2022-10-27	0.64152		1	3.65427e-10	2.17181e-09	0.000281232	0.000281232	0.6	1	0.35848	1.04886	378400	0.00746422	2.5	0.984771	1	0.896201	0.000281232	0.000205053	0.000280217	00:00:00	762334	2022-11-10
2022-10-28	1.45411e+07	0			0.4	0.0179615	0.0477291	2.18117e+08	0.00276708	2.5		0	2022-10-28	0.64152		1	3.53314e-10	2.10569e-09	0.000280777	0.000280777	0.6	1	0.35848	1.04886	378700	0.00744929	2.5	0.984771	1	0.896201	0.000280777	0.000204589	0.000279761	00:00:00	762334	2022-11-10
2022-10-29	1.45411e+07	0			0.4	0.0174147	0.0462762	2.18117e+08	0.00268285	2.5		0	2022-10-29	0.64152		1	3.41603e-10	2.0416e-09	0.000280323	0.000280323	0.6	1	0.35848	1.04886	379000	0.00743439	2.5	0.984771	1	0.896201	0.000280323	0.000204125	0.000279306	00:00:00	762334	2022-11-10
2022-10-30	1.45411e+07	0			0.4	0.0168846	0.0448675	2.18117e+08	0.00260118	2.5		0	2022-10-30	0.64152		1	3.30281e-10	1.97945e-09	0.00027987	0.00027987	0.6	1	0.35848	1.04886	379300	0.00741952	2.5	0.984771	1	0.896201	0.00027987	0.000203663	0.000278852	00:00:00	762334	2022-11-10
2022-10-31	1.45411e+07	0			0.4	0.0163706	0.0435017	2.18117e+08	0.002522	2.5		0	2022-10-31	0.64152		1	3.19334e-10	1.91919e-09	0.000279418	0.000279418	0.6	1	0.35848	1.04886	379600	0.00740468	2.5	0.984771	1	0.896201	0.000279418	0.000203202	0.000278399	00:00:00	762334	2022-11-10
2022-11-01	1.45411e+07	0			0.4	0.0158723	0.0421775	2.18117e+08	0.00244523	2.5		0	2022-11-01	0.64152		1	3.0875e-10	1.86077e-09	0.000278967	0.000278967	0.6	1	0.35848	1.04886	379900	0.00738987	2.5	0.984771	1	0.896201	0.000278967	0.000202742	0.000277947	00:00:00	762334	2022-11-10
2022-11-02	1.45411e+07	0			0.4	0.0153891	0.0408936	2.18117e+08	0.00237079	2.5		0	2022-11-02	0.64152		1	2.98517e-10	1.80413e-09	0.000278516	0.000278516	0.6	1	0.35848	1.04886	380200	0.00737509	2.5	0.984771	1	0.896201	0.000278516	0.000202283	0.000277495	00:00:00	762334	2022-11-10
2022-11-03	1.45411e+07	0			0.4	0.0149207	0.0396487	2.18117e+08	0.00229862	2.5		0	2022-11-03	0.64152		1	2.88623e-10	1.74921e-09	0.000278066	0.000278066	0.6	1	0.35848	1.04886	380500	0.00736034	2.5	0.984771	1	0.896201	0.000278066	0.000201825	0.000277045	00:00:00	762334	2022-11-10
2022-11-04	1.45411e+07	0			0.4	0.0144665	0.0384418	2.18117e+08	0.00222865	2.5		0	2022-11-04	0.64152		1	2.79058e-10	1.69596e-09	0.000277617	0.000277617	0.6	1	0.35848	1.04886	380800	0.00734562	2.5	0.984771	1	0.896201	0.000277617	0.000201369	0.000276595	00:00:00	762334	2022-11-10
2022-11-05	1.45411e+07	0			0.4	0.0140261	0.0372716	2.18117e+08	0.00216081	2.5		0	2022-11-05	0.64152		1	2.69809e-10	1.64433e-09	0.000277169	0.000277169	0.6	1	0.35848	1.04886	381100	0.00733093	2.5	0.984771	1	0.896201	0.000277169	0.000200913	0.000276145	00:00:00	762334	2022-11-10
2022-11-06	1.45411e+07	0			0.4	0.0135991	0.036137	2.18117e+08	0.00209503	2.5		0	2022-11-06	0.64152		1	2.60868e-10	1.59428e-09	0.000276721	0.000276721	0.6	1	0.35848	1.04886	381400	0.00731627	2.5	0.984771	1	0.896201	0.000276721	0.000200459	0.000275697	00:00:00	762334	2022-11-10
2022-11-07	1.45411e+07	0			0.4	0.0131852	0.035037	2.18117e+08	0.00203126	2.5		0	2022-11-07	0.64152		1	2.52222e-10	1.54575e-09	0.000276275	0.000276275	0.6	1	0.35848	1.04886	381700	0.00730164	2.5	0.984771	1	0.896201	0.000276275	0.000200005	0.000275249	00:00:00	762334	2022-11-10
2022-11-08	1.45411e+07	0			0.4	0.0127838	0.0339704	2.18117e+08	0.00196942	2.5		0	2022-11-08	0.64152		1	2.43864e-10	1.4987e-09	0.000275829	0.000275829	0.6	1	0.35848	1.04886	382000	0.00728703	2.5	0.984771	1	0.896201	0.000275829	0.000199553	0.000274803	00:00:00	762334	2022-11-10
2022-11-09	1.45411e+07	0			0.4	0.0123946	0.0329363	2.18117e+08	0.00190947	2.5		0	2022-11-09	0.64152		1	2.35782e-10	1.45307e-09	0.000275384	0.000275384	0.6	1	0.35848	1.04886	382300	0.00727246	2.5	0.984771	1	0.896201	0.000275384	0.000199101	0.000274357	00:00:00	762334	2022-11-10
2022-11-10	1.45411e+07	0			0.4	0	0.0319337	2.18117e+08	0.00185135	2.5		0	2022-11-10	0.64152		1	0	1.40884e-09	0.000274939	0.000274939	0.6	1	0.35848	1.04886	382600	0.00725791	2.5	0.984771	1	0.896201	0.000274939	0.000198651	0.000273911	00:00:00	762334	2022-11-10
2022-11-11	1.45411e+07	0			0.4	0	0.0291667	2.18117e+08	0	2.5		0	2022-11-11	0.64152		1	0	1.28676e-09	0.000274496	0.000274496	0.6	1	0.35848	1.04886	382900	0.0072434	2.5	0.984771	1	0.896201	0.000274496	0.000198202	0.000273467	00:00:00	762334	2022-11-11
2022-11-12	1.45411e+07	0			0.4	0	0.0264838	2.18117e+08	0	2.5		0	2022-11-12	0.64152		1	0	1.1684e-09	0.000274053	0.000274053	0.6	1	0.35848	1.04886	383200	0.00722891	2.5	0.984771	1	0.896201	0.000274053	0.000197754	0.000273023	00:00:00	762334	2022-11-12
2022-11-13	1.45411e+07	0			0.4	0	0.0238826	2.18117e+08	0	2.5		0	2022-11-13	0.64152		1	0	1.05365e-09	0.000273611	0.000273611	0.6	1	0.35848	1.04886	383500	0.00721445	2.5	0.984771	1	0.896201	0.000273611	0.000197306	0.00027258	00:00:00	762334	2022-11-13
2022-11-14	1.45411e+07	0			0.4	0	0.0213606	2.18117e+08	0	2.5		0	2022-11-14	0.64152		1	0	9.42381e-10	0.00027317	0.00027317	0.6	1	0.35848	1.04886	383800	0.00720002	2.5	0.984771	1	0.896201	0.00027317	0.00019686	0.000272138	00:00:00	762334	2022-11-14
2022-11-15	1.45411e+07	0			0.4	0	0.0189154	2.18117e+08	0	2.5		0	2022-11-15	0.64152		1	0	8.34503e-10	0.000272729	0.000272729	0.6	1	0.35848	1.04886	384100	0.00718562	2.5	0.984771	1	0.896201	0.000272729	0.000196415	0.000271697	00:00:00	762334	2022-11-15
2022-11-16	1.45411e+07	0			0.4	0	0.0165446	2.18117e+08	0	2.5		0	2022-11-16	0.64152		1	0	7.2991e-10	0.00027229	0.00027229	0.6	1	0.35848	1.04886	384400	0.00717125	2.5	0.984771	1	0.896201	0.00027229	0.000195972	0.000271256	00:00:00	762334	2022-11-16
2022-11-17	1.45411e+07	0			0.4	0	0.014246	2.18117e+08	0	2.5		0	2022-11-17	0.64152		1	0	6.285e-10	0.000271851	0.000271851	0.6	1	0.35848	1.04886	384700	0.00715691	2.5	0.984771	1	0.896201	0.000271851	0.000195529	0.000270817	00:00:00	762334	2022-11-17
2022-11-18	1.45411e+07	0			0.4	0	0.0120173	2.18117e+08	0	2.5		0	2022-11-18	0.64152		1	0	5.30177e-10	0.000271413	0.000271413	0.6	1	0.35848	1.04886	385000	0.0071426	2.5	0.984771	1	0.896201	0.000271413	0.000195087	0.000270378	00:00:00	762334	2022-11-18
2022-11-19	1.45411e+07	0			0.4	0	0.00985654	2.18117e+08	0	2.5		0	2022-11-19	0.64152		1	0	4.34847e-10	0.000270975	0.000270975	0.6	1	0.35848	1.04886	385300	0.00712831	2.5	0.984771	1	0.896201	0.000270975	0.000194646	0.000269939	00:00:00	762334	2022-11-19
2022-11-20	1.45411e+07	0			0.4	0	0.0077615	2.18117e+08	0	2.5		0	2022-11-20	0.64152		1	0	3.42419e-10	0.000270539	0.000270539	0.6	1	0.35848	1.04886	385600	0.00711405	2.5	0.984771	1	0.896201	0.000270539	0.000194206	0.000269502	00:00:00	762334	2022-11-20
2022-11-21	1.45411e+07	0			0.4	0	0.00573025	2.18117e+08	0	2.5		0	2022-11-21	0.64152		1	0	2.52805e-10	0.000270103	0.000270103	0.6	1	0.35848	1.04886	385900	0.00709983	2.5	0.984771	1	0.896201	0.000270103	0.000193767	0.000269065	00:00:00	762334	2022-11-21
2022-11-22	1.45411e+07	0			0.4	0	0.00376082	2.18117e+08	0	2.5		0	2022-11-22	0.64152		1	0	1.65919e-10	0.000269668	0.000269668	0.6	1	0.35848	1.04886	386200	0.00708563	2.5	0.984771	1	0.896201	0.000269668	0.00019333	0.000268629	00:00:00	762334	2022-11-22
2022-11-23	1.45411e+07	0			0.4	0	0.00185135	2.18117e+08	0	2.5		0	2022-11-23	0.64152		1	0	8.16771e-11	0.000269234	0.000269234	0.6	1	0.35848	1.04886	386500	0.00707146	2.5	0.984771	1	0.896201	0.000269234	0.000192893	0.000268194	00:00:00	762334	2022-11-23
2022-11-24	1.45411e+07	0			0.4	0	0	2.18117e+08	0	2.5		0	2022-11-24	0.64152		1	0	0	0.0002688	0.0002688	0.6	1	0.35848	1.04886	386800	0.00705731	2.5	0.984771	1	0.896201	0.0002688	0.000192457	0.00026776	00:00:00	762334	2022-11-24
2022-11-25	1.45411e+07	0			0.4	0	0	2.18117e+08	0	2.5		0	2022-11-25	0.64152		1	0	0	0.000268367	0.000268367	0.6	1	0.35848	1.04886	387100	0.0070432	2.5	0.984771	1	0.896201	0.000268367	0.000192023	0.000267326	00:00:00	762334	2022-11-25
2022-11-26	1.45411e+07	0			0.4	0	0	2.18117e+08	0	2.5		0	2022-11-26	0.64152		1	0	0	0.000267935	0.000267935	0.6	1	0.35848	1.04886	387400	0.00702911	2.5	0.984771	1	0.896201	0.000267935	0.000191589	0.000266893	00:00:00	762334	2022-11-26
2022-11-27	1.45411e+07	0			0.4	0	0	2.18117e+08	0	2.5		0	2022-11-27	0.64152		1	0	0	0.000267504	0.000267504	0.6	1	0.35848	1.04886	387700	0.00701505	2.5	0.984771	1	0.896201	0.000267504	0.000191157	0.000266461	00:00:00	762334	2022-11-27
2022-11-28	1.45411e+07	0			0.4	0	0	2.18117e+08	0	2.5		0	2022-11-28	0.64152		1	0	0	0.000267074	0.000267074	0.6	1	0.35848	1.04886	388000	0.00700102	2.5	0.984771	1	0.896201	0.000267074	0.000190725	0.00026603	00:00:00	762334	2022-11-28
2022-11-29	1.45411e+07	0			0.4	0	0	2.18117e+08	0	2.5		0	2022-11-29	0.64152		1	0	0	0.000266644	0.000266644	0.6	1	0.35848	1.04886	388300	0.00698702	2.5	0.984771	1	0.896201	0.000266644	0.000190295	0.0002656	00:00:00	762334	2022-11-29
2022-11-30	1.45411e+07	0			0.4	0	0	2.18117e+08	0	2.5		0	2022-11-30	0.64152		1	0	0	0.000266215	0.000266215	0.6	1	0.35848	1.04886	388600	0.00697305	2.5	0.984771	1	0.896201	0.000266215	0.000189865	0.00026517	00:00:00	762334	2022-11-30
2022-12-01	1.45411e+07	0			0.4	0	0	2.18117e+08	0	2.5		0	2022-12-01	0.64152		1	0	0	0.000265787	0.000265787	0.6	1	0.35848	1.04886	388900	0.0069591	2.5	0.984771	1	0.896201	0.000265787	0.000189437	0.000264741	00:00:00	762334	2022-12-01
2022-12-02	1.45411e+07	0			0.4	0	0	2.18117e+08	0	2.5		0	2022-12-02	0.64152		1	0	0	0.000265359	0.000265359	0.6	1	0.35848	1.04886	389200	0.00694518	2.5	0.984771	1	0.896201	0.000265359	0.000189009	0.000264312	00:00:00	762334	2022-12-02
2022-12-03	1.45411e+07	0			0.4	0	0	2.18117e+08	0	2.5		0	2022-12-03	0.64152		1	0	0	0.000264932	0.000264932	0.6	1	0.35848	1.04886	389500	0.00693129	2.5	0.984771	1	0.896201	0.000264932	0.000188583	0.000263885	00:00:00	762334	2022-12-03
2022-12-04	1.45411e+07	0			0.4	0	0	2.18117e+08	0	2.5		0	2022-12-04	0.64152		1	0	0	0.000264506	0.000264506	0.6	1	0.35848	1.04886	389800	0.00691743	2.5	0.984771	1	0.896201	0.000264506	0.000188157	0.000263458	00:00:00	762334	2022-12-04
2022-12-05	1.45411e+07	0			0.4	0	0	2.18117e+08	0	2.5		0	2022-12-05	0.64152		1	0	0	0.000264081	0.000264081	0.6	1	0.35848	1.04886	390100	0.0069036	2.5	0.984771	1	0.896201	0.000264081	0.000187733	0.000263032	00:00:00	762334	2022-12-05
2022-12-06	1.45411e+07	0			0.4	0	0	2.18117e+08	0	2.5		0	2022-12-06	0.64152		1	0	0	0.000263657	0.000263657	0.6	1	0.35848	1.04886	390400	0.00688979	2.5	0.984771	1	0.896201	0.000263657	0.000187309	0.000262607	00:00:00	762334	2022-12-06
2022-12-07	1.45411e+07	0			0.4	0	0	2.18117e+08	0	2.5		0	2022-12-07	0.64152		1	0	0	0.000263233	0.000263233	0.6	1	0.35848	1.04886	390700	0.00687601	2.5	0.984771	1	0.896201	0.000263233	0.000186887	0.000262182	00:00:00	762334	2022-12-07
2022-12-08	1.45411e+07	0			0.4	0	0	2.18117e+08	0	2.5		0	2022-12-08	0.64152		1	0	0	0.00026281	0.00026281	0.6	1	0.35848	1.04886	391000	0.00686226	2.5	0.984771	1	0.896201	0.00026281	0.000186465	0.000261758	00:00:00	762334	2022-12-08
2022-12-09	1.45411e+07	0			0.4	0	0	2.18117e+08	0	2.5		0	2022-12-09	0.64152		1	0	0	0.000262387	0.000262387	0.6	1	0.35848	1.04886	391300	0.00684853	2.5	0.984771	1	0.896201	0.000262387	0.000186045	0.000261335	00:00:00	762334	2022-12-09
2022-12-10	1.45411e+07	0			0.4	0	0	2.18117e+08	0	2.5		0	2022-12-10	0.64152		1	0	0	0.000261966	0.000261966	0.6	1	0.35848	1.04886	391600	0.00683484	2.5	0.984771	1	0.896201	0.000261966	0.000185625	0.000260913	00:00:00	762334	2022-12-10
2022-12-11	1.45411e+07	0			0.4	0	0	2.18117e+08	0	2.5		0	2022-12-11	0.64152		1	0	0	0.000261545	0.000261545	0.6	1	0.35848	1.04886	391900	0.00682117	2.5	0.984771	1	0.896201	0.000261545	0.000185207	0.000260491	00:00:00	762334	2022-12-11

## Sheet: US-daily
2020-05-01	2020-06-01	2021-09-01	2020-06-01	2020-07-15	2020-09-01	2021-01-01	scale all unlocks by	0-main region, 1-subregion, 2-without sub	Use Daily Partial Unlock->1	UNLOCK ALL->1	Initial & Unlocked R0	Total / Known case ratio	Mortality as % of vent cases enter at right	FINAL CASES	Econ Cost % 18-month lock down	Total Est. Deaths	Use proportional vent. alloc.	Initial Known Cases on Vent.	Spreading Window (Days)	Case Duration	Vents per capita	Vents avail for current region	Vents main region	Vents subregion (if not auto alloc)	Pre-Peak Vent. Util. Target	MWFSa or late Vent. Util. Target	TTSu Vent. Util. Target	Population	Population main region	Population subregion (e.g. NY St.)	Name of main region	Name of sub-region	Ventil mfg rate/day	Change per day in crit cases on vent (.01%=half in 1 yr.)	region mortality % of vent cases	sub-region mortality % of vent cases	region w/o sub-region mortality % vent cases
0	0.4	RE- LOCK	0.24	0.525	0.715	1	1	0	1	0	2.5	15	1.05	0.612326	0.29244	727593	0	0.05	6	14	0.000316176	100000	100000	7500	0.6	0.6	0.6	340000000	340000000	20000000	US	NY	0	0.0001	1.05	1.5	0.88
Date	Predicted Known cases	US known cases	US known cases	NY known cases	Target Vent. Util.	Known Spreading Cases	Known Active Cases	Total Cum. Cases	US Known New Cases	US COVID-19 Replication Rate (R0)	Unlock this day of the week on:	Lock-down ON/OFF	60% Herd immunity Threshold	US cases - NOT ended	historical known cases	UNLOCK %: R0=2.5, Deaths=0.73M, Cost=29.2%	ventilator utilization, 100000+0/day, Case Ratio=15	predicted active cases, partial daily unlock, case ratio=15	predicted active cases as of 3/21	case ratio 15/1	herd immunity ihreshold 60%	potential unlock effectiveness	suscepti-bility	last actual R0	current # ventils	current % known cases on vent	last 2-day avg R0	last locked R0	susceptibility change rate	Rt	US pred	NY pred	US excl NY pred	predicted from date	Est. Deaths	cases end date	date
2020-03-21	24000	24000	24000	10356	0	24000	24000	360000	3528.4	2.5	2021-01-01	0	2020-03-21	0.00105882	0.00105882	0.4	0.012	0.00105882	0.00423529	0.15	0.6	0.4	0.998941	2.5	100000	0.05	2.5	2.5	1	2.49735	0.00423529	0.0062136	0.00426375	2020-05-01	185.241	00:00:00		delta-cases
2020-03-22	32821	32821	32821	15168	0	32821	32821	492315	8821	2.35262	2021-01-01	1	2020-03-22	0.00144799	0.00144799	0	0.0163777	0.00144799	0.00599253	0.15	0.6	0	0.998552	2.35262	100000	0.0499	2.42631	2.35262	0.99961	2.34922	0.00599253	0.00878651	0.00603274	2020-05-01	648.344	00:00:00	2020-03-22	8821
2020-03-23	43600	43600	43600	20875	0	43600	43600	654000	10779	2.16157	2021-01-01	1	2020-03-23	0.00192353	0.00192353	0	0.0217129	0.00192353	0.00847445	0.15	0.6	0	0.998076	2.16157	100000	0.0498002	2.2571	2.16157	0.999524	2.15741	0.00847445	0.0124154	0.00853121	2020-05-01	1214.24	00:00:00	2020-03-23	10779
2020-03-24	53870	53870	53870	25665	0	53870	53870	808050	10270	2.10687	2021-01-01	1	2020-03-24	0.00237662	0.00237662	0	0.0267737	0.00237662	0.0119755	0.15	0.6	0	0.997623	2.10687	100000	0.0497006	2.13422	2.10687	0.999546	2.10187	0.0119755	0.0175242	0.0120556	2020-05-01	1753.42	00:00:00	2020-03-24	10270
2020-03-25	67857	67857	67857	30811	0	67857	67857	1017855	13987	2.04473	2021-01-01	1	2020-03-25	0.00299369	0.00299369	0	0.0336579	0.00299369	0.0169056	0.15	0.6	0	0.997006	2.04473	100000	0.0496012	2.0758	2.04473	0.999381	2.03861	0.0169056	0.0246981	0.0170182	2020-05-01	2487.73	00:00:00	2020-03-25	13987
2020-03-26	84773	84773	84773	37258	0	84773	84773	1271595	16916	1.95223	2021-01-01	1	2020-03-26	0.00373999	0.00373999	0	0.0419643	0.00373999	0.0238305	0.15	0.6	0	0.99626	1.95223	100000	0.049502	1.99848	1.95223	0.999251	1.94492	0.0238305	0.0347348	0.0239884	2020-05-01	3375.82	00:00:00	2020-03-26	16916
2020-03-27	102738	102738	102738	44635	0	78738	102738	1541070	17965	1.84384	2021-01-01	1	2020-03-27	0.00453256	0.00453256	0	0.0388989	0.00453256	0.0335233	0.15	0.6	0	0.995467	1.84384	100000	0.049403	1.89803	1.84384	0.999204	1.83548	0.0335233	0.0487049	0.0337438	2020-05-01	4318.99	00:00:00	2020-03-27	17965
2020-03-28	122070	122070	122070	52318	0	89249	122070	1831050	19332	1.82848		1	2020-03-28	0.00538544	0.00538544	0	0.0440035	0.00538544	0.04674	0.15	0.6	0	0.994615	1.82848	100000	0.0493042	1.83616	1.82848	0.999143	1.81864	0.04674	0.0676022	0.0470444	2020-05-01	5333.92	00:00:00	2020-03-28	19332
2020-03-29	140321	140321	140321	59513	0	96721	140321	2104815	18251	1.71288		1	2020-03-29	0.00619063	0.00619063	0	0.0475921	0.00619063	0.0643276	0.15	0.6	0	0.993809	1.71288	100000	0.0492056	1.77068	1.71288	0.99919	1.70228	0.0643276	0.0924662	0.0647407	2020-05-01	6292.09	00:00:00	2020-03-29	18251
2020-03-30	162417	162417	162417	66497	0	108547	162417	2436255	22096	1.68898		1	2020-03-30	0.00716546	0.00716546	0	0.0533044	0.00716546	0.0874799	0.15	0.6	0	0.992835	1.68898	100000	0.0491072	1.70093	1.68898	0.999019	1.67687	0.0874799	0.124697	0.0880308	2020-05-01	7452.13	00:00:00	2020-03-30	22096
2020-03-31	187500	187500	187500	75795	0	119643	187500	2812500	25083	1.6542		1	2020-03-31	0.00827206	0.00827206	0	0.0586358	0.00827206	0.117531	0.15	0.6	0	0.991728	1.6542	100000	0.049009	1.67159	1.6542	0.998885	1.64052	0.117531	0.165675	0.118252	2020-05-01	8768.99	00:00:00	2020-03-31	25083
2020-04-01	214465	214465	214465	83712	0	129692	214465	3216975	26965	1.60208		1	2020-04-01	0.00946169	0.00946169	0	0.0634336	0.00946169	0.155829	0.15	0.6	0	0.990538	1.60208	100000	0.0489109	1.62814	1.60208	0.9988	1.58692	0.155829	0.216486	0.156751	2020-05-01	10184.7	00:00:00	2020-04-01	26965
2020-04-02	244000	244000	244000	92381	0	141262	244000	3660000	29535	1.57791		1	2020-04-02	0.0107647	0.0107647	0	0.0689544	0.0107647	0.203501	0.15	0.6	0	0.989235	1.57791	100000	0.0488131	1.59	1.57791	0.998685	1.56093	0.203501	0.277513	0.204647	2020-05-01	11735.2	00:00:00	2020-04-02	29535
2020-04-03	276000	276000	276000	102863	0	153930	276000	4140000	32000	1.54834		1	2020-04-03	0.0121765	0.0121765	0	0.0749877	0.0121765	0.261084	0.15	0.6	0	0.987824	1.54834	100000	0.0487155	1.56313	1.54834	0.998573	1.52949	0.261084	0.347953	0.262462	2020-05-01	13415.2	00:00:00	2020-04-03	32000
2020-04-04	310500	310500	310500	113704	0	170179	286500	4657500	34500	1.51828		1	2020-04-04	0.0136985	0.0136985	0	0.0827377	0.0126397	0.311259	0.15	0.6	0	0.986301	1.51828	100000	0.0486181	1.53331	1.51828	0.998459	1.49748	0.311259	0.400831	0.312737	2020-05-01	15226.5	00:00:00	2020-04-04	34500
2020-04-05	336327	336327	336327	123018	0	173910	303506	5044905	25827	1.38878		1	2020-04-05	0.014838	0.014838	0	0.0843826	0.01339	0.379179	0.15	0.6	0	0.985162	1.38878	100000	0.0485208	1.45353	1.38878	0.998845	1.36817	0.379179	0.471759	0.38077	2020-05-01	16582.4	00:00:00	2020-04-05	25827
2020-04-06	364028	364028	364028	130689	0	176528	320428	5460420	27701	1.35278		1	2020-04-06	0.0160601	0.0160601	0	0.0854815	0.0141365	0.448852	0.15	0.6	0	0.98394	1.35278	100000	0.0484238	1.37078	1.35278	0.998759	1.33105	0.448852	0.537363	0.45045	2020-05-01	18036.7	00:00:00	2020-04-06	27701
2020-04-07	395000	395000	395000	139000	0	180535	341130	5925000	30972	1.32813		1	2020-04-07	0.0174265	0.0174265	0	0.087247	0.0150499	0.515085	0.15	0.6	0	0.982574	1.32813	100000	0.0483269	1.34045	1.32813	0.998611	1.30499	0.515085	0.591865	0.516562	2020-05-01	19662.7	00:00:00	2020-04-07	30972
2020-04-08	426659	426659	426659	149316	0	182659	358802	6399885	31659	1.28047		1	2020-04-08	0.0188232	0.0188232	0	0.0880969	0.0158295	0.572266	0.15	0.6	0	0.981177	1.28047	100000	0.0482303	1.3043	1.28047	0.998579	1.25636	0.572266	0.630591	0.573491	2020-05-01	21324.8	00:00:00	2020-04-08	31659
2020-04-09	466546	466546	466546	161504	0	190546	381773	6998190	39887	1.3179		1	2020-04-09	0.0205829	0.0205829	0	0.0917171	0.0168429	0.615228	0.15	0.6	0	0.979417	1.3179	100000	0.0481338	1.29918	1.3179	0.998207	1.29077	0.615228	0.650371	0.616094	2020-05-01	23418.9	00:00:00	2020-04-09	39887
2020-04-10	502000	502000	502000	173258	0	191500	399262	7530000	35454	1.26072		1	2020-04-10	0.0221471	0.0221471	0	0.0919919	0.0176145	0.640319	0.15	0.6	0	0.977853	1.26072	100000	0.0480375	1.28931	1.26072	0.998403	1.2328	0.640319	0.649909	0.64076	2020-05-01	25280.2	00:00:00	2020-04-10	35454
2020-04-11	531257	531257	531257	180458	0	194930	409187	7968855	29257	1.19394		1	2020-04-11	0.0234378	0.0234378	0	0.0934523	0.0180524	0.64573	0.15	0.6	0	0.976562	1.19394	100000	0.0479415	1.22733	1.19394	0.99868	1.16595	0.64573	0.629468	0.645721	2020-05-01	26816.2	00:00:00	2020-04-11	29257
2020-04-12	560402	560402	560402	189415	0	196374	420081	8406030	29145	1.16741		1	2020-04-12	0.0247236	0.0247236	0	0.0939563	0.018533	0.631305	0.15	0.6	0	0.975276	1.16741	100000	0.0478456	1.18068	1.16741	0.998683	1.13855	0.631305	0.590562	0.63085	2020-05-01	28346.3	00:00:00	2020-04-12	29145
2020-04-13	585290	585290	585290	195031	0	190290	422873	8779350	24888	1.09562		1	2020-04-13	0.0258216	0.0258216	0	0.0908633	0.0186562	0.598222	0.15	0.6	0	0.974178	1.09562	100000	0.0477499	1.13152	1.09562	0.998874	1.06733	0.598222	0.535908	0.597358	2020-05-01	29653	00:00:00	2020-04-13	24888
2020-04-14	611745	611745	611745	202208	0	185086	424245	9176175	26455	1.07278		1	2020-04-14	0.0269887	0.0269887	0	0.0882016	0.0187167	0.548788	0.15	0.6	0	0.973011	1.07278	100000	0.0476544	1.0842	1.07278	0.998802	1.04383	0.548788	0.469442	0.547575	2020-05-01	31041.9	00:00:00	2020-04-14	26455
2020-04-15	644025	644025	644025	214642	0	177479	429560	9660375	32280	1.09556		1	2020-04-15	0.0284129	0.0284129	0	0.0844074	0.0189512	0.486447	0.15	0.6	0	0.971587	1.09556	100000	0.0475591	1.08417	1.09556	0.998536	1.06443	0.486447	0.396228	0.484974	2020-05-01	32736.6	00:00:00	2020-04-15	32280
2020-04-16	676339	676339	676339	226198	0	174339	432339	10145085	32314	1.0891		1	2020-04-16	0.0298385	0.0298385	0	0.0827482	0.0190738	0.415846	0.15	0.6	0	0.970162	1.0891	100000	0.047464	1.09233	1.0891	0.998533	1.0566	0.415846	0.322038	0.414229	2020-05-01	34433	00:00:00	2020-04-16	32314
2020-04-17	709201	709201	709201	233951	0	177944	433201	10638015	32862	1.0971		1	2020-04-17	0.0312883	0.0312883	0	0.0842904	0.0191118	0.342499	0.15	0.6	0	0.968712	1.0971	100000	0.047369	1.0931	1.0971	0.998506	1.06278	0.342499	0.252379	0.340868	2020-05-01	36158.3	00:00:00	2020-04-17	32862
2020-04-18	737023	737023	737023	241041	0	176621	426523	11055345	27822	1.05497		1	2020-04-18	0.0325157	0.0325157	0	0.0834964	0.0188172	0.271967	0.15	0.6	0	0.967484	1.05497	100000	0.0472743	1.07604	1.05497	0.998733	1.02067	0.271967	0.1914	0.270444	2020-05-01	37618.9	00:00:00	2020-04-18	27822
2020-04-19	764265	764265	764265	247215	0	178975	427938	11463975	27242	1.04165		1	2020-04-19	0.0337176	0.0337176	0	0.08444	0.0188796	0.208799	0.15	0.6	0	0.966282	1.04165	100000	0.0471798	1.04831	1.04165	0.998758	1.00653	0.208799	0.141228	0.207471	2020-05-01	39049.2	00:00:00	2020-04-19	27242
2020-04-20	792759	792759	792759	252094	0	181014	428731	11891385	28494	1.03724		1	2020-04-20	0.0349747	0.0349747	0	0.0852312	0.0189146	0.155711	0.15	0.6	0	0.965025	1.03724	100000	0.0470854	1.03945	1.03724	0.998699	1.00096	0.155711	0.102024	0.154622	2020-05-01	40545.1	00:00:00	2020-04-20	28494
2020-04-21	816385	816385	816385	256555	0	172360	421385	12245775	23626	0.979247		1	2020-04-21	0.036017	0.036017	0	0.0809941	0.0185905	0.113447	0.15	0.6	0	0.963983	0.979247	100000	0.0469912	1.00824	0.979247	0.99892	0.943977	0.113447	0.0726087	0.112597	2020-05-01	41785.5	00:00:00	2020-04-21	23626
2020-04-22	848994	848994	848994	262268	0	172655	422335	12734910	32609	1.04832		1	2020-04-22	0.0374556	0.0374556	0	0.0809704	0.0186324	0.0812314	0.15	0.6	0	0.962544	1.04832	100000	0.0468972	1.01378	1.04832	0.998508	1.00906	0.0812314	0.0512009	0.0805932	2020-05-01	43497.4	00:00:00	2020-04-22	32609
2020-04-23	879430	879430	879430	268581	0	170229	412884	13191450	30436	1.03063		1	2020-04-23	0.0387984	0.0387984	0	0.079673	0.0182155	0.0574769	0.15	0.6	0	0.961202	1.03063	100000	0.0468034	1.03947	1.03063	0.998605	0.990639	0.0574769	0.0359644	0.0570121	2020-05-01	45095.3	00:00:00	2020-04-23	30436
2020-04-24	925038	925038	925038	277445	0	188015	423038	13875570	45608	1.16643		1	2020-04-24	0.0408105	0.0408105	0	0.0878215	0.0186634	0.0403853	0.15	0.6	0	0.95919	1.16643	100000	0.0467098	1.09853	1.16643	0.997907	1.11883	0.0403853	0.0252946	0.0400546	2020-05-01	47489.7	00:00:00	2020-04-24	45608
2020-04-25	960525	960525	960525	288313	0.6	196260	429268	14407875	35487	1.09446		1	2020-04-25	0.0423761	0.0423761	0	0.0914894	0.0189383	0.028305	0.15	0.6	0	0.957624	1.09446	100000	0.0466164	1.13045	1.09446	0.998368	1.04808	0.028305	0.0179096	0.0280741	2020-05-01	49352.8	00:00:00	2020-04-25	35487
2020-04-26	987322	987322	987322	293991	0	194563	426920	14809830	26797	1.02769		1	2020-04-26	0.0435583	0.0435583	0	0.0905169	0.0188347	0.0198761	0.15	0.6	0	0.956442	1.02769	100000	0.0465232	1.06108	1.02769	0.998765	0.982923	0.0198761	0.0128402	0.0197175	2020-05-01	50759.6	00:00:00	2020-04-26	26797
2020-04-27	1010356	1010356	1010356	298004	0.6	193971	425066	15155340	23034	0.999728		1	2020-04-27	0.0445745	0.0445745	0	0.090061	0.0187529	0.0140488	0.15	0.6	0	0.955425	0.999728	100000	0.0464301	1.01371	0.999728	0.998938	0.955166	0.0140488	0.00937982	0.0139416	2020-05-01	51968.9	00:00:00	2020-04-27	23034
2020-04-28	1035765	1035765	1035765	303048	0	186771	424020	15536475	25409	0.97696		1	2020-04-28	0.0456955	0.0456955	0	0.0865446	0.0187068	0.0100459	0.15	0.6	0	0.954304	0.97696	100000	0.0463373	0.988344	0.97696	0.998827	0.932318	0.0100459	0.00702672	0.00997476	2020-05-01	53302.9	00:00:00	2020-04-28	25409
2020-04-29	1064194	1064194	1064194	306158	0.6	184764	420169	15962910	28429	0.979414		1	2020-04-29	0.0469497	0.0469497	0	0.0854434	0.0185369	0.00730826	0.15	0.6	0	0.95305	0.979414	100000	0.0462446	0.978187	0.979414	0.998686	0.93343	0.00730826	0.0054306	0.00726219	2020-05-01	54795.4	00:00:00	2020-04-29	28429
2020-04-30	1094464	1094464	1094464	310389	0.6	169426	418125	16416960	30270	0.984771		1	2020-04-30	0.0482852	0.0482852	0	0.0781937	0.0184467	0.00544148	0.15	0.6	0	0.951715	0.984771	100000	0.0461521	0.982093	0.984771	0.998599	0.937222	0.00544148	0.00434964	0.00541275	2020-05-01	56384.6	00:00:00	2020-04-30	30270
2020-05-01	1129882	1129882	1129882	314318	0.6	169357	420681	16948230	35418	1.04886		0	2020-05-01	0.0498477	0.0498477	0.4	0.0780055	0.0185595	0.00417115	0.15	0.6	0.4	0.950152	1.04886	100000	0.0460598	1.01681	0.984771	0.998358	0.996574	0.00417115	0.00361814	0.00415436	2020-05-01	58244	00:00:00	2020-05-01	35418
2020-05-02	1.15712e+06	0	0	0	0	169794	420093	1.73567e+07	27234.2	1.01547		1	2020-05-02	0.0510492		0	0.0780505	0.0185335	0.00330788	0.15	0.6	0	0.948951	1.04886	100000	0.0459677	1.03217	1.01547	0.998735	0.963635	0.00330788	0.00312305	0.00329927	00:00:00	59673.8	00:00:00	2020-05-02	-1129882
2020-05-03	1.18853e+06	0	0	0	0	178169	424260	1.78279e+07	31409	1.1696		0	2020-05-03	0.0524349		0.4	0.0817365	0.0187174	0.00272166	0.15	0.6	0.4	0.947565	1.04886	100000	0.0458758	1.09254	1.01547	0.99854	1.10828	0.00272166	0.00278757	0.00271865	00:00:00	61322.8	00:00:00	2020-05-03	0
2020-05-04	1.21865e+06	0	0	0	0.6	182887	425893	1.82798e+07	30127.1	1.0707		1	2020-05-04	0.0537641		0	0.0837331	0.0187894	0.00232361	0.15	0.6	0	0.946236	1.04886	100000	0.045784	1.12015	1.0707	0.998597	1.01313	0.00232361	0.00255972	0.00232443	00:00:00	62904.5	00:00:00	2020-05-04	0
2020-05-05	1.24969e+06	0	0	0	0	185497	433306	1.87454e+07	31039	1.07616		1	2020-05-05	0.0551334		0	0.0847582	0.0191165	0.0020532	0.15	0.6	0	0.944867	1.04886	100000	0.0456924	1.07343	1.07616	0.998553	1.01683	0.0020532	0.00240436	0.00205661	00:00:00	64534	00:00:00	2020-05-05	0
2020-05-06	1.28581e+06	0	0	0	0.6	191346	436816	1.92871e+07	36118.6	1.23644		0	2020-05-06	0.0567269		0.4	0.0872558	0.0192713	0.00186925	0.15	0.6	0.4	0.943273	1.04886	100000	0.0456011	1.1563	1.07616	0.998314	1.1663	0.00186925	0.00229777	0.00187442	00:00:00	66430.3	00:00:00	2020-05-06	0
2020-05-07	1.32351e+06	0	0	0	0	193625	444077	1.98526e+07	37697.3	1.25315		0	2020-05-07	0.05839		0.4	0.0881185	0.0195916	0.00174384	0.15	0.6	0.4	0.94161	1.04886	100000	0.0455099	1.2448	1.07616	0.998237	1.17998	0.00174384	0.00222399	0.0017502	00:00:00	68409.4	00:00:00	2020-05-07	0
2020-05-08	1.35856e+06	0	0	0	0.6	201447	433525	2.03784e+07	35055.6	1.15365		1	2020-05-08	0.0599366		0	0.0914947	0.0191261	0.00165804	0.15	0.6	0	0.940063	1.04886	100000	0.0454188	1.2034	1.15365	0.998358	1.08451	0.00165804	0.00217225	0.0016652	00:00:00	70249.8	00:00:00	2020-05-08	0
2020-05-09	1.39559e+06	0	0	0	0	207061	435061	2.09338e+07	37023.2	1.17303		1	2020-05-09	0.06157		0	0.0938565	0.0191939	0.00159901	0.15	0.6	0	0.93843	1.04886	100000	0.045328	1.16334	1.17303	0.998262	1.1008	0.00159901	0.00213531	0.0016067	00:00:00	72193.5	00:00:00	2020-05-09	0
2020-05-10	1.43776e+06	0	0	0	0	219109	450439	2.15664e+07	42175	1.30229		0	2020-05-10	0.0634306		0.4	0.0991189	0.0198723	0.00155807	0.15	0.6	0.4	0.936569	1.04886	100000	0.0452373	1.23766	1.17303	0.998017	1.21968	0.00155807	0.00210832	0.00156611	00:00:00	74407.7	00:00:00	2020-05-10	0
2020-05-11	1.47776e+06	0	0	0	0.6	228067	467402	2.21664e+07	39997.4	1.16946		1	2020-05-11	0.0651952		0	0.102965	0.0206207	0.00152936	0.15	0.6	0	0.934805	1.04886	100000	0.0451469	1.23587	1.16946	0.998116	1.09321	0.00152936	0.002088	0.00153762	00:00:00	76507.6	00:00:00	2020-05-11	0
2020-05-12	1.51945e+06	0	0	0	0	233643	483688	2.27918e+07	41694.7	1.17341		1	2020-05-12	0.0670347		0	0.105272	0.0213392	0.0015089	0.15	0.6	0	0.932965	1.04886	100000	0.0450566	1.17143	1.17341	0.998032	1.09475	0.0015089	0.00207216	0.0015173	00:00:00	78696.5	00:00:00	2020-05-12	0
2020-05-13	1.56209e+06	0	0	0	0.6	238579	497893	2.34313e+07	42633.5	1.1735		1	2020-05-13	0.0689156		0	0.107281	0.0219658	0.00149401	0.15	0.6	0	0.931084	1.04886	100000	0.0449665	1.17345	1.1735	0.997984	1.09263	0.00149401	0.00205932	0.0015025	00:00:00	80934.8	00:00:00	2020-05-13	0
2020-05-14	1.60971e+06	0	0	0	0	251151	515250	2.41457e+07	47627	1.28642		0	2020-05-14	0.0710168		0.4	0.112708	0.0227316	0.00148288	0.15	0.6	0.4	0.928983	1.04886	100000	0.0448765	1.22996	1.1735	0.997743	1.19506	0.00148288	0.00204852	0.00149141	00:00:00	83435.2	00:00:00	2020-05-14	0
2020-05-15	1.65523e+06	0	0	0	0	259645	525349	2.48285e+07	45517.6	1.17055		1	2020-05-15	0.0730249		0	0.116287	0.0231772	0.00147429	0.15	0.6	0	0.926975	1.04886	100000	0.0447868	1.22848	1.17055	0.997838	1.08507	0.00147429	0.00203907	0.00148284	00:00:00	85824.9	00:00:00	2020-05-15	0
2020-05-16	1.70216e+06	0	0	0	0.6	264397	545042	2.55324e+07	46926.7	1.16983		1	2020-05-16	0.0750952		0	0.118178	0.024046	0.00146742	0.15	0.6	0	0.924905	1.04886	100000	0.0446972	1.17019	1.16983	0.997767	1.08198	0.00146742	0.00203055	0.00147596	00:00:00	88288.5	00:00:00	2020-05-16	0
2020-05-17	1.75571e+06	0	0	0	0	277955	567189	2.63357e+07	53555.8	1.31403		0	2020-05-17	0.077458		0.4	0.12399	0.025023	0.0014617	0.15	0.6	0.4	0.922542	1.04886	100000	0.0446078	1.24193	1.16983	0.997445	1.21225	0.0014617	0.00202266	0.00147023	00:00:00	91100.2	00:00:00	2020-05-17	0
2020-05-18	1.80597e+06	0	0	0	0.6	286512	587313	2.70895e+07	50251.5	1.17582		1	2020-05-18	0.0796749		0	0.127551	0.0259109	0.00145677	0.15	0.6	0	0.920325	1.04886	100000	0.0445186	1.24492	1.17582	0.997597	1.08213	0.00145677	0.00201519	0.00146527	00:00:00	93738.4	00:00:00	2020-05-18	0
2020-05-19	1.8577e+06	0	0	0	0	295611	608006	2.78655e+07	51731.9	1.17713		1	2020-05-19	0.0819572		0	0.131338	0.0268238	0.00145236	0.15	0.6	0	0.918043	1.04886	100000	0.0444296	1.17647	1.17713	0.99752	1.08066	0.00145236	0.00200801	0.00146084	00:00:00	96454.3	00:00:00	2020-05-19	0
2020-05-20	1.91102e+06	0	0	0	0.6	301309	625212	2.86653e+07	53324.9	1.17896		1	2020-05-20	0.0843098		0	0.133602	0.0275829	0.00144832	0.15	0.6	0	0.91569	1.04886	100000	0.0443407	1.17805	1.17896	0.997437	1.07956	0.00144832	0.00200105	0.00145676	00:00:00	99253.9	00:00:00	2020-05-20	0
2020-05-21	1.96368e+06	0	0	0	0	308452	640176	2.94552e+07	52660.7	1.14519		1	2020-05-21	0.0866331		0	0.136496	0.028243	0.00144452	0.15	0.6	0	0.913367	1.04886	100000	0.044252	1.16207	1.14519	0.997463	1.04598	0.00144452	0.00199423	0.00145293	00:00:00	102019	00:00:00	2020-05-21	0
2020-05-22	2.02391e+06	0	0	0	0.6	321752	665347	3.03586e+07	60226.7	1.28265		0	2020-05-22	0.0892901		0.4	0.142097	0.0293535	0.0014409	0.15	0.6	0.4	0.91071	1.04886	100000	0.0441635	1.21392	1.14519	0.997091	1.16812	0.0014409	0.00198752	0.00144927	00:00:00	105180	00:00:00	2020-05-22	0
2020-05-23	2.08075e+06	0	0	0	0	325038	685166	3.12113e+07	56842.1	1.16391		1	2020-05-23	0.0917979		0	0.143261	0.0302279	0.00143738	0.15	0.6	0	0.908202	1.04886	100000	0.0440752	1.22328	1.16391	0.997246	1.05707	0.00143738	0.00198089	0.00144572	00:00:00	108165	00:00:00	2020-05-23	0
2020-05-24	2.14497e+06	0	0	0	0	339005	707210	3.21746e+07	64219.2	1.30527		0	2020-05-24	0.0946311		0.4	0.149118	0.0312004	0.00143395	0.15	0.6	0.4	0.905369	1.04886	100000	0.043987	1.23459	1.16391	0.99688	1.18175	0.00143395	0.00197433	0.00144225	00:00:00	111536	00:00:00	2020-05-24	0
2020-05-25	2.20636e+06	0	0	0	0.6	348667	728606	3.30955e+07	61393.8	1.20017		1	2020-05-25	0.0973396		0	0.153062	0.0321444	0.00143058	0.15	0.6	0	0.90266	1.04886	100000	0.0438991	1.25272	1.20017	0.997008	1.08335	0.00143058	0.00196781	0.00143884	00:00:00	114759	00:00:00	2020-05-25	0
2020-05-26	2.26824e+06	0	0	0	0	357216	748785	3.40236e+07	61873.1	1.17955		1	2020-05-26	0.100069		0	0.156501	0.0330346	0.00142725	0.15	0.6	0	0.899931	1.04886	100000	0.0438113	1.18986	1.17955	0.996976	1.06152	0.00142725	0.00196135	0.00143547	00:00:00	118008	00:00:00	2020-05-26	0
2020-05-27	2.33165e+06	0	0	0	0.6	367963	769559	3.49747e+07	63407.8	1.18346		1	2020-05-27	0.102867		0	0.160887	0.0339511	0.00142396	0.15	0.6	0	0.897133	1.04886	100000	0.0437236	1.18151	1.18346	0.996892	1.06172	0.00142396	0.00195492	0.00143213	00:00:00	121337	00:00:00	2020-05-27	0
2020-05-28	2.40307e+06	0	0	0	0	379157	793353	3.6046e+07	71421	1.29812		0	2020-05-28	0.106018		0.4	0.16545	0.0350009	0.00142068	0.15	0.6	0.4	0.893982	1.04886	100000	0.0436362	1.24079	1.18346	0.996488	1.1605	0.00142068	0.00194852	0.00142882	00:00:00	125086	00:00:00	2020-05-28	0
2020-05-29	2.46959e+06	0	0	0	0.6	388836	814356	3.70438e+07	66520.8	1.1775		1	2020-05-29	0.108952		0	0.169334	0.0359275	0.00141743	0.15	0.6	0	0.891048	1.04886	100000	0.0435489	1.23781	1.1775	0.996717	1.04921	0.00141743	0.00194217	0.00142553	00:00:00	128579	00:00:00	2020-05-29	0
2020-05-30	2.53755e+06	0	0	0	0	392582	835394	3.80633e+07	67965.2	1.17699		1	2020-05-30	0.111951		0	0.170623	0.0368556	0.00141419	0.15	0.6	0	0.888049	1.04886	100000	0.0434618	1.17724	1.17699	0.996635	1.04522	0.00141419	0.00193584	0.00142226	00:00:00	132147	00:00:00	2020-05-30	0
2020-05-31	2.61428e+06	0	0	0	0	407915	858566	3.92142e+07	76726.9	1.32048		0	2020-05-31	0.115336		0.4	0.176933	0.0378779	0.00141097	0.15	0.6	0.4	0.884664	1.04886	100000	0.0433749	1.24873	1.17699	0.996188	1.16818	0.00141097	0.00192954	0.001419	00:00:00	136175	00:00:00	2020-05-31	0
2020-06-01	2.69054e+06	0	0	0	0.6	422306	884579	4.03582e+07	76264.8	1.26802		0	2020-06-01	0.1187		0.24	0.182809	0.0390255	0.00140777	0.15	0.6	0.24	0.8813	1.04886	100000	0.0432881	1.29425	1.17699	0.996197	1.11751	0.00140777	0.00192327	0.00141575	00:00:00	140179	00:00:00	2020-06-01	0
2020-06-02	2.7706e+06	0	0	0	0	438958	912906	4.1559e+07	80059	1.29066		0	2020-06-02	0.122232		0.24	0.189637	0.0402753	0.00140457	0.15	0.6	0.24	0.877768	1.04886	100000	0.0432016	1.27934	1.17699	0.995992	1.1329	0.00140457	0.00191703	0.00141251	00:00:00	144382	00:00:00	2020-06-02	0
2020-06-03	2.85531e+06	0	0	0	0.6	452244	944288	4.28297e+07	84707.1	1.31907		0	2020-06-03	0.12597		0.24	0.194986	0.0416598	0.00140138	0.15	0.6	0.24	0.87403	1.04886	100000	0.0431152	1.30486	1.17699	0.995743	1.15291	0.00140138	0.00191082	0.00140929	00:00:00	148829	00:00:00	2020-06-03	0
2020-06-04	2.94219e+06	0	0	0	0	472599	978504	4.41328e+07	86876.2	1.31872		0	2020-06-04	0.129802		0.24	0.203354	0.0431693	0.00139821	0.15	0.6	0.24	0.870198	1.04886	100000	0.0430289	1.3189	1.17699	0.995615	1.14755	0.00139821	0.00190463	0.00140608	00:00:00	153390	00:00:00	2020-06-04	0
2020-06-05	3.03344e+06	0	0	0	0.6	495891	1.00953e+06	4.55017e+07	91257.1	1.3314		0	2020-06-05	0.133828		0.24	0.21295	0.0445383	0.00139505	0.15	0.6	0.24	0.866172	1.04886	100000	0.0429429	1.32506	1.17699	0.995373	1.15322	0.00139505	0.00189848	0.00140288	00:00:00	158181	00:00:00	2020-06-05	0
2020-06-06	3.12948e+06	0	0	0	0	515205	1.04873e+06	4.69423e+07	96040.8	1.34158		0	2020-06-06	0.138065		0.24	0.220801	0.0462676	0.00139189	0.15	0.6	0.24	0.861935	1.04886	100000	0.042857	1.33649	1.17699	0.995108	1.15635	0.00139189	0.00189235	0.00139969	00:00:00	163223	00:00:00	2020-06-06	0
2020-06-07	3.22919e+06	0	0	0	0	538650	1.08422e+06	4.84379e+07	99709.7	1.34721		0	2020-06-07	0.142464		0.24	0.230387	0.0478334	0.00138875	0.15	0.6	0.24	0.857536	1.04886	100000	0.0427713	1.34439	1.17699	0.994896	1.15528	0.00138875	0.00188625	0.00139651	00:00:00	168458	00:00:00	2020-06-07	0
2020-06-08	3.33346e+06	0	0	0	0.6	562854	1.12709e+06	5.00019e+07	104263	1.35433		0	2020-06-08	0.147064		0.24	0.240258	0.0497247	0.00138562	0.15	0.6	0.24	0.852936	1.04886	100000	0.0426857	1.35077	1.17699	0.994636	1.15515	0.00138562	0.00188017	0.00139334	00:00:00	173932	00:00:00	2020-06-08	0
2020-06-09	3.44228e+06	0	0	0	0	586970	1.17404e+06	5.16342e+07	108823	1.36006		0	2020-06-09	0.151865		0.24	0.250051	0.051796	0.0013825	0.15	0.6	0.24	0.848135	1.04886	100000	0.0426004	1.35719	1.17699	0.994371	1.15352	0.0013825	0.00187412	0.00139018	00:00:00	179645	00:00:00	2020-06-09	0
2020-06-10	3.55551e+06	0	0	0	0.6	613323	1.22386e+06	5.33326e+07	113230	1.36468		0	2020-06-10	0.156861		0.24	0.260755	0.053994	0.00137938	0.15	0.6	0.24	0.843139	1.04886	100000	0.0425152	1.36237	1.17699	0.99411	1.15062	0.00137938	0.0018681	0.00138703	00:00:00	185590	00:00:00	2020-06-10	0
2020-06-11	3.6735e+06	0	0	0	0	640060	1.27044e+06	5.51025e+07	117993	1.36905		0	2020-06-11	0.162066		0.24	0.271578	0.0560487	0.00137628	0.15	0.6	0.24	0.837934	1.04886	100000	0.0424301	1.36687	1.17699	0.993826	1.14717	0.00137628	0.00186211	0.00138389	00:00:00	191784	00:00:00	2020-06-11	0
2020-06-12	3.79621e+06	0	0	0	0.6	666724	1.32662e+06	5.69431e+07	122706	1.37273		0	2020-06-12	0.16748		0.24	0.282326	0.0585274	0.00137318	0.15	0.6	0.24	0.83252	1.04886	100000	0.0423453	1.37089	1.17699	0.993539	1.14283	0.00137318	0.00185614	0.00138076	00:00:00	198226	00:00:00	2020-06-12	0
2020-06-13	3.92349e+06	0	0	0	0	694299	1.38594e+06	5.88524e+07	127285	1.3759		0	2020-06-13	0.173095		0.24	0.293415	0.0611445	0.0013701	0.15	0.6	0.24	0.826905	1.04886	100000	0.0422606	1.37432	1.17699	0.993255	1.13774	0.0013701	0.00185019	0.00137764	00:00:00	204909	00:00:00	2020-06-13	0
2020-06-14	4.05542e+06	0	0	0	0	721959	1.44114e+06	6.08313e+07	131923	1.3787		0	2020-06-14	0.178915		0.24	0.304494	0.0635796	0.00136703	0.15	0.6	0.24	0.821085	1.04886	100000	0.0421761	1.3773	1.17699	0.992962	1.13203	0.00136703	0.00184428	0.00137452	00:00:00	211835	00:00:00	2020-06-14	0
2020-06-15	4.19187e+06	0	0	0	0.6	749589	1.50132e+06	6.2878e+07	136452	1.38112		0	2020-06-15	0.184935		0.24	0.315515	0.0662349	0.00136396	0.15	0.6	0.24	0.815065	1.04886	100000	0.0420917	1.37991	1.17699	0.992668	1.1257	0.00136396	0.00183839	0.00137142	00:00:00	218998	00:00:00	2020-06-15	0
2020-06-16	4.33272e+06	0	0	0	0	777208	1.56211e+06	6.49908e+07	140849	1.38321		0	2020-06-16	0.191149		0.24	0.326486	0.0689168	0.00136091	0.15	0.6	0.24	0.808851	1.04886	100000	0.0420075	1.38216	1.17699	0.992376	1.11881	0.00136091	0.00183252	0.00136833	00:00:00	226393	00:00:00	2020-06-16	0
2020-06-17	4.47783e+06	0	0	0	0.6	804331	1.62252e+06	6.71675e+07	145116	1.38504		0	2020-06-17	0.197551		0.24	0.337204	0.0715819	0.00135786	0.15	0.6	0.24	0.802449	1.04886	100000	0.0419235	1.38413	1.17699	0.992085	1.11142	0.00135786	0.00182668	0.00136525	00:00:00	234012	00:00:00	2020-06-17	0
2020-06-18	4.627e+06	0	0	0	0	830788	1.68481e+06	6.94049e+07	149162	1.38663		0	2020-06-18	0.204132		0.24	0.347599	0.0743298	0.00135482	0.15	0.6	0.24	0.795868	1.04886	100000	0.0418397	1.38583	1.17699	0.991799	1.10357	0.00135482	0.00182086	0.00136218	00:00:00	241843	00:00:00	2020-06-18	0
2020-06-19	4.77995e+06	0	0	0	0.6	856460	1.74651e+06	7.16993e+07	152957	1.388		0	2020-06-19	0.21088		0.24	0.357623	0.0770519	0.0013518	0.15	0.6	0.24	0.78912	1.04886	100000	0.041756	1.38731	1.17699	0.991521	1.0953	0.0013518	0.00181507	0.00135912	00:00:00	249873	00:00:00	2020-06-19	0
2020-06-20	4.93644e+06	0	0	0	0	881018	1.80695e+06	7.40465e+07	156482	1.3892		0	2020-06-20	0.217784		0.24	0.367142	0.0797184	0.00134878	0.15	0.6	0.24	0.782216	1.04886	100000	0.0416725	1.3886	1.17699	0.991252	1.08665	0.00134878	0.00180931	0.00135606	00:00:00	258088	00:00:00	2020-06-20	0
2020-06-21	5.09612e+06	0	0	0	0	904246	1.86692e+06	7.64417e+07	159680	1.39024		0	2020-06-21	0.224829		0.24	0.376068	0.0823642	0.00134577	0.15	0.6	0.24	0.775171	1.04886	100000	0.0415891	1.38972	1.17699	0.990994	1.07767	0.00134577	0.00180357	0.00135302	00:00:00	266471	00:00:00	2020-06-21	0
2020-06-22	5.25863e+06	0	0	0	0.6	925917	1.92518e+06	7.88795e+07	162519	1.39114		0	2020-06-22	0.231999		0.24	0.384311	0.0849343	0.00134277	0.15	0.6	0.24	0.768001	1.04886	100000	0.0415059	1.39069	1.17699	0.99075	1.0684	0.00134277	0.00179785	0.00134998	00:00:00	275004	00:00:00	2020-06-22	0
2020-06-23	5.4236e+06	0	0	0	0	945769	1.98132e+06	8.1354e+07	164968	1.39193		0	2020-06-23	0.239277		0.24	0.391765	0.0874113	0.00133978	0.15	0.6	0.24	0.760723	1.04886	100000	0.0414229	1.39154	1.17699	0.990523	1.05887	0.00133978	0.00179216	0.00134696	00:00:00	283664	00:00:00	2020-06-23	0
2020-06-24	5.59059e+06	0	0	0	0.6	963596	2.03508e+06	8.38589e+07	166990	1.39261		0	2020-06-24	0.246644		0.24	0.398351	0.089783	0.0013368	0.15	0.6	0.24	0.753356	1.04886	100000	0.0413401	1.39227	1.17699	0.990316	1.04913	0.0013368	0.00178649	0.00134394	00:00:00	292431	00:00:00	2020-06-24	0
2020-06-25	5.75915e+06	0	0	0	0	979200	2.08565e+06	8.63873e+07	168562	1.3932		0	2020-06-25	0.25408		0.24	0.403993	0.092014	0.00133383	0.15	0.6	0.24	0.74592	1.04886	100000	0.0412574	1.39291	1.17699	0.990129	1.03922	0.00133383	0.00178085	0.00134094	00:00:00	301281	00:00:00	2020-06-25	0
2020-06-26	5.92882e+06	0	0	0	0.6	992382	2.13261e+06	8.89323e+07	169663	1.39372		0	2020-06-26	0.261565		0.24	0.408612	0.0940857	0.00133086	0.15	0.6	0.24	0.738435	1.04886	100000	0.0411749	1.39346	1.17699	0.989965	1.02917	0.00133086	0.00177523	0.00133794	00:00:00	310188	00:00:00	2020-06-26	0
2020-06-27	6.09909e+06	0	0	0	0.6	1.00298e+06	2.1756e+06	9.14864e+07	170276	1.39417		0	2020-06-27	0.269078		0.24	0.412149	0.0959823	0.00132791	0.15	0.6	0.24	0.730922	1.04886	100000	0.0410925	1.39394	1.17699	0.989827	1.01903	0.00132791	0.00176963	0.00133495	00:00:00	319128	00:00:00	2020-06-27	0
2020-06-28	6.26948e+06	0	0	0	0	1.01085e+06	2.21407e+06	9.40423e+07	170391	1.39455		0	2020-06-28	0.276595		0.24	0.414553	0.0976795	0.00132497	0.15	0.6	0.24	0.723405	1.04886	100000	0.0410104	1.39436	1.17699	0.989715	1.00883	0.00132497	0.00176406	0.00133197	00:00:00	328073	00:00:00	2020-06-28	0
2020-06-29	6.43949e+06	0	0	0	0.6	1.01589e+06	2.24762e+06	9.65923e+07	170003	1.39489		0	2020-06-29	0.284095		0.24	0.415785	0.0991597	0.00132203	0.15	0.6	0.24	0.715905	1.04886	100000	0.0409283	1.39472	1.17699	0.989632	0.99861	0.00132203	0.00175852	0.001329	00:00:00	336998	00:00:00	2020-06-29	0
2020-06-30	6.6086e+06	0	0	0	0	1.01801e+06	2.27589e+06	9.9129e+07	169115	1.39519		0	2020-06-30	0.291556		0.24	0.415821	0.100407	0.0013191	0.15	0.6	0.24	0.708444	1.04886	100000	0.0408465	1.39504	1.17699	0.989578	0.988411	0.0013191	0.00175299	0.00132604	00:00:00	345877	00:00:00	2020-06-30	0
2020-07-01	6.77634e+06	0	0	0	0.6	1.01718e+06	2.2985e+06	1.01645e+08	167733	1.39544		0	2020-07-01	0.298956		0.24	0.414652	0.101404	0.00131618	0.15	0.6	0.24	0.701044	1.04886	100000	0.0407648	1.39531	1.17699	0.989555	0.978266	0.00131618	0.00174749	0.00132309	00:00:00	354683	00:00:00	2020-07-01	0
2020-07-02	6.94221e+06	0	0	0	0	1.01339e+06	2.31521e+06	1.04133e+08	165872	1.39566		0	2020-07-02	0.306274		0.24	0.41228	0.102142	0.00131328	0.15	0.6	0.24	0.693726	1.04886	100000	0.0406833	1.39555	1.17699	0.989561	0.968208	0.00131328	0.00174201	0.00132015	00:00:00	363391	00:00:00	2020-07-02	0
2020-07-03	7.10576e+06	0	0	0	0.6	1.00667e+06	2.3258e+06	1.06586e+08	163551	1.39586		0	2020-07-03	0.313489		0.24	0.408725	0.102609	0.00131037	0.15	0.6	0.24	0.686511	1.04886	100000	0.0406019	1.39576	1.17699	0.989599	0.95827	0.00131037	0.00173656	0.00131721	00:00:00	371978	00:00:00	2020-07-03	0
2020-07-04	7.26655e+06	0	0	0	0.6	997069	2.33012e+06	1.08998e+08	160795	1.39602		0	2020-07-04	0.320583		0.24	0.404019	0.102799	0.00130748	0.15	0.6	0.24	0.679417	1.04886	100000	0.0405207	1.39594	1.17699	0.989667	0.948481	0.00130748	0.00173112	0.00131429	00:00:00	380419	00:00:00	2020-07-04	0
2020-07-05	7.42419e+06	0	0	0	0	984699	2.32807e+06	1.11363e+08	157633	1.39617		0	2020-07-05	0.327538		0.24	0.398209	0.102709	0.0013046	0.15	0.6	0.24	0.672462	1.04886	100000	0.0404396	1.3961	1.17699	0.989764	0.93887	0.0013046	0.00172572	0.00131137	00:00:00	388695	00:00:00	2020-07-05	0
2020-07-06	7.57829e+06	0	0	0	0.6	969683	2.31965e+06	1.13674e+08	154098	1.39629		0	2020-07-06	0.334336		0.24	0.391352	0.102338	0.00130173	0.15	0.6	0.24	0.665664	1.04886	100000	0.0403588	1.39623	1.17699	0.98989	0.929463	0.00130173	0.00172033	0.00130847	00:00:00	396785	00:00:00	2020-07-06	0
2020-07-07	7.72851e+06	0	0	0	0	952176	2.30491e+06	1.15928e+08	150226	1.3964		0	2020-07-07	0.340964		0.24	0.383518	0.101687	0.00129886	0.15	0.6	0.24	0.659036	1.04886	100000	0.0402781	1.39635	1.17699	0.990044	0.920281	0.00129886	0.00171496	0.00130557	00:00:00	404672	00:00:00	2020-07-07	0
2020-07-08	7.87457e+06	0	0	0	0.6	932359	2.28397e+06	1.18118e+08	146055	1.3965		0	2020-07-08	0.347407		0.24	0.374785	0.100764	0.001296	0.15	0.6	0.24	0.652593	1.04886	100000	0.0401975	1.39645	1.17699	0.990223	0.911345	0.001296	0.00170962	0.00130268	00:00:00	412340	00:00:00	2020-07-08	0
2020-07-09	8.01619e+06	0	0	0	0	910433	2.25704e+06	1.20243e+08	141625	1.39658		0	2020-07-09	0.353655		0.24	0.365239	0.0995752	0.00129316	0.15	0.6	0.24	0.646345	1.04886	100000	0.0401171	1.39654	1.17699	0.990426	0.902673	0.00129316	0.0017043	0.0012998	00:00:00	419775	00:00:00	2020-07-09	0
2020-07-10	8.15317e+06	0	0	0	0.6	886615	2.22435e+06	1.22298e+08	136978	1.39665		0	2020-07-10	0.359699		0.24	0.354973	0.0981332	0.00129032	0.15	0.6	0.24	0.640301	1.04886	100000	0.0400369	1.39662	1.17699	0.99065	0.89428	0.00129032	0.001699	0.00129693	00:00:00	426967	00:00:00	2020-07-10	0
2020-07-11	8.28532e+06	0	0	0	0.6	861134	2.18623e+06	1.2428e+08	132153	1.39672		0	2020-07-11	0.365529		0.24	0.344082	0.0964512	0.00128748	0.15	0.6	0.24	0.634471	1.04886	100000	0.0399568	1.39669	1.17699	0.990894	0.886176	0.00128748	0.00169373	0.00129406	00:00:00	433905	00:00:00	2020-07-11	0
2020-07-12	8.41251e+06	0	0	0	0	834227	2.14303e+06	1.26188e+08	127191	1.39677		0	2020-07-12	0.37114		0.24	0.332664	0.0945454	0.00128466	0.15	0.6	0.24	0.62886	1.04886	100000	0.0398769	1.39674	1.17699	0.991156	0.878373	0.00128466	0.00168848	0.00129121	00:00:00	440582	00:00:00	2020-07-12	0
2020-07-13	8.53464e+06	0	0	0	0.6	806133	2.09516e+06	1.2802e+08	122131	1.39682		0	2020-07-13	0.376528		0.24	0.320818	0.0924333	0.00128185	0.15	0.6	0.24	0.623472	1.04886	100000	0.0397971	1.39679	1.17699	0.991432	0.870877	0.00128185	0.00168324	0.00128836	00:00:00	446994	00:00:00	2020-07-13	0
2020-07-14	8.65165e+06	0	0	0	0	777088	2.04305e+06	1.29775e+08	117010	1.39686		0	2020-07-14	0.381691		0.24	0.30864	0.0901346	0.00127904	0.15	0.6	0.24	0.618309	1.04886	100000	0.0397175	1.39684	1.17699	0.99172	0.863691	0.00127904	0.00167803	0.00128552	00:00:00	453137	00:00:00	2020-07-14	0
2020-07-15	8.7718e+06	0	0	0	0.6	755607	1.99546e+06	1.31577e+08	120143	1.50029		0	2020-07-15	0.386991		0.525	0.299508	0.0880351	0.00127624	0.15	0.6	0.525	0.613009	1.04886	100000	0.0396381	1.44857	1.17699	0.991428	0.919691	0.00127624	0.00167284	0.0012827	00:00:00	459445	00:00:00	2020-07-15	0
2020-07-16	8.88962e+06	0	0	0	0.6	736448	1.94741e+06	1.33344e+08	117819	1.52617		0	2020-07-16	0.392189		0.525	0.29133	0.0859151	0.00127345	0.15	0.6	0.525	0.607811	1.04886	100000	0.0395588	1.51323	1.17699	0.991521	0.927622	0.00127345	0.00166768	0.00127987	00:00:00	465630	00:00:00	2020-07-16	0
2020-07-17	9.00589e+06	0	0	0	0.6	720565	1.90013e+06	1.35088e+08	116270	1.55851		0	2020-07-17	0.397319		0.525	0.284477	0.0838292	0.00127067	0.15	0.6	0.525	0.602681	1.04886	100000	0.0394797	1.54234	1.17699	0.991561	0.939283	0.00127067	0.00166253	0.00127706	00:00:00	471734	00:00:00	2020-07-17	0
2020-07-18	9.12161e+06	0	0	0	0.6	709101	1.85506e+06	1.36824e+08	115727	1.59892		0	2020-07-18	0.402424		0.525	0.279391	0.0818409	0.0012679	0.15	0.6	0.525	0.597576	1.04886	100000	0.0394007	1.57871	1.17699	0.991529	0.955475	0.0012679	0.0016574	0.00127426	00:00:00	477810	00:00:00	2020-07-18	0
2020-07-19	9.23628e+06	0	0	0	0.6	701632	1.81209e+06	1.38544e+08	114663	1.62357		0	2020-07-19	0.407483		0.525	0.275896	0.0799451	0.00126513	0.15	0.6	0.525	0.592517	1.04886	100000	0.0393219	1.61125	1.17699	0.991535	0.961996	0.00126513	0.0016523	0.00127146	00:00:00	483830	00:00:00	2020-07-19	0
2020-07-20	9.35046e+06	0	0	0	0.6	698804	1.77217e+06	1.40257e+08	114182	1.64793		0	2020-07-20	0.41252		0.525	0.274234	0.0781841	0.00126238	0.15	0.6	0.525	0.58748	1.04886	100000	0.0392433	1.63575	1.17699	0.991498	0.968123	0.00126238	0.00164722	0.00126868	00:00:00	489824	00:00:00	2020-07-20	0
2020-07-21	9.46474e+06	0	0	0	0.6	692945	1.73623e+06	1.41971e+08	114284	1.67028		0	2020-07-21	0.417562		0.525	0.271391	0.0765984	0.00125963	0.15	0.6	0.525	0.582438	1.04886	100000	0.0391648	1.6591	1.17699	0.991418	0.972835	0.00125963	0.00164215	0.0012659	00:00:00	495824	00:00:00	2020-07-21	0
2020-07-22	9.5783e+06	0	0	0	0.6	688680	1.70373e+06	1.43674e+08	113554	1.68812		0	2020-07-22	0.422572		0.525	0.269181	0.0751646	0.00125689	0.15	0.6	0.525	0.577428	1.04886	100000	0.0390865	1.6792	1.17699	0.991399	0.974769	0.00125689	0.00163711	0.00126313	00:00:00	501786	00:00:00	2020-07-22	0
2020-07-23	9.69125e+06	0	0	0	0.6	685363	1.67506e+06	1.45369e+08	112953	1.70426		0	2020-07-23	0.427555		0.525	0.267349	0.0738996	0.00125416	0.15	0.6	0.525	0.572445	1.04886	100000	0.0390083	1.69619	1.17699	0.99137	0.975594	0.00125416	0.00163209	0.00126036	00:00:00	507716	00:00:00	2020-07-23	0
2020-07-24	9.80361e+06	0	0	0	0.6	681996	1.65044e+06	1.47054e+08	112360	1.71834		0	2020-07-24	0.432512		0.525	0.265503	0.0728136	0.00125143	0.15	0.6	0.525	0.567488	1.04886	100000	0.0389303	1.7113	1.17699	0.991341	0.975138	0.00125143	0.00162709	0.00125761	00:00:00	513615	00:00:00	2020-07-24	0
2020-07-25	9.91522e+06	0	0	0	0.6	678949	1.6299e+06	1.48728e+08	111615	1.73036		0	2020-07-25	0.437436		0.525	0.263788	0.0719075	0.00124872	0.15	0.6	0.525	0.562564	1.04886	100000	0.0388524	1.72435	1.17699	0.991323	0.973436	0.00124872	0.00162211	0.00125486	00:00:00	519475	00:00:00	2020-07-25	0
2020-07-26	1.0026e+07	0	0	0	0.6	675591	1.61354e+06	1.50391e+08	110824	1.74092		0	2020-07-26	0.442326		0.525	0.261959	0.0711855	0.00124601	0.15	0.6	0.525	0.557674	1.04886	100000	0.0387747	1.73564	1.17699	0.991309	0.970864	0.00124601	0.00161715	0.00125213	00:00:00	525293	00:00:00	2020-07-26	0
2020-07-27	1.01359e+07	0	0	0	0.6	671200	1.6013e+06	1.52039e+08	109893	1.75008		0	2020-07-27	0.447174		0.525	0.259736	0.0706455	0.00124331	0.15	0.6	0.525	0.552826	1.04886	100000	0.0386972	1.7455	1.17699	0.991306	0.96749	0.00124331	0.0016122	0.0012494	00:00:00	531062	00:00:00	2020-07-27	0
2020-07-28	1.02447e+07	0	0	0	0.6	666367	1.59301e+06	1.5367e+08	108721	1.75802		0	2020-07-28	0.45197		0.525	0.25735	0.0702798	0.00124062	0.15	0.6	0.525	0.54803	1.04886	100000	0.0386198	1.75405	1.17699	0.991324	0.963445	0.00124062	0.00160728	0.00124667	00:00:00	536770	00:00:00	2020-07-28	0
2020-07-29	1.03521e+07	0	0	0	0.6	660836	1.58029e+06	1.55281e+08	107422	1.76493		0	2020-07-29	0.45671		0.525	0.254703	0.0697186	0.00123793	0.15	0.6	0.525	0.54329	1.04886	100000	0.0385425	1.76147	1.17699	0.991352	0.958869	0.00123793	0.00160238	0.00124396	00:00:00	542410	00:00:00	2020-07-29	0
2020-07-30	1.04581e+07	0	0	0	0.6	654444	1.56844e+06	1.56871e+08	105968	1.77093		0	2020-07-30	0.461385		0.525	0.251735	0.0691958	0.00123526	0.15	0.6	0.525	0.538615	1.04886	100000	0.0384655	1.76793	1.17699	0.991395	0.953852	0.00123526	0.0015975	0.00124125	00:00:00	547973	00:00:00	2020-07-30	0
2020-07-31	1.05624e+07	0	0	0	0.6	647176	1.55651e+06	1.58436e+08	104347	1.77615		0	2020-07-31	0.465988		0.525	0.248441	0.0686698	0.00123259	0.15	0.6	0.525	0.534012	1.04886	100000	0.0383885	1.77354	1.17699	0.991453	0.948483	0.00123259	0.00159264	0.00123856	00:00:00	553451	00:00:00	2020-07-31	0
2020-08-01	1.0665e+07	0	0	0	0.6	638918	1.54335e+06	1.59975e+08	102567	1.78068		0	2020-08-01	0.470513		0.525	0.244781	0.0680892	0.00122993	0.15	0.6	0.525	0.529487	1.04886	100000	0.0383118	1.77841	1.17699	0.991526	0.942846	0.00122993	0.0015878	0.00123587	00:00:00	558836	00:00:00
2020-08-02	1.07656e+07	0	0	0	0.6	629647	1.52931e+06	1.61484e+08	100622	1.78462		0	2020-08-02	0.474953		0.525	0.240746	0.0674697	0.00122727	0.15	0.6	0.525	0.525047	1.04886	100000	0.0382351	1.78265	1.17699	0.991616	0.937008	0.00122727	0.00158297	0.00123318	00:00:00	564119	00:00:00
2020-08-03	1.08641e+07	0	0	0	0.6	619446	1.51365e+06	1.62962e+08	98519.3	1.78804		0	2020-08-03	0.479299		0.525	0.236372	0.0667787	0.00122463	0.15	0.6	0.525	0.520701	1.04886	100000	0.0381587	1.78633	1.17699	0.991722	0.931033	0.00122463	0.00157817	0.00123051	00:00:00	569291	00:00:00
2020-08-04	1.09604e+07	0	0	0	0.6	608304	1.49565e+06	1.64406e+08	96280.6	1.79101		0	2020-08-04	0.483547		0.525	0.231657	0.0659845	0.00122199	0.15	0.6	0.525	0.516453	1.04886	100000	0.0380823	1.78952	1.17699	0.991842	0.924973	0.00122199	0.00157338	0.00122784	00:00:00	574346	00:00:00
2020-08-05	1.10543e+07	0	0	0	0.6	596249	1.47601e+06	1.65815e+08	93912.8	1.79359		0	2020-08-05	0.48769		0.525	0.226611	0.0651179	0.00121936	0.15	0.6	0.525	0.51231	1.04886	100000	0.0380062	1.7923	1.17699	0.991978	0.918876	0.00121936	0.00156862	0.00122518	00:00:00	579276	00:00:00
2020-08-06	1.11457e+07	0	0	0	0.6	583329	1.45448e+06	1.67186e+08	91427.3	1.79584		0	2020-08-06	0.491723		0.525	0.221258	0.0641683	0.00121674	0.15	0.6	0.525	0.508277	1.04886	100000	0.0379302	1.79471	1.17699	0.992127	0.912782	0.00121674	0.00156387	0.00122253	00:00:00	584076	00:00:00
2020-08-07	1.12346e+07	0	0	0	0.6	569601	1.43096e+06	1.68519e+08	88838.4	1.79779		0	2020-08-07	0.495643		0.525	0.215618	0.0631305	0.00121412	0.15	0.6	0.525	0.504357	1.04886	100000	0.0378543	1.79681	1.17699	0.992289	0.906727	0.00121412	0.00155914	0.00121989	00:00:00	588740	00:00:00
2020-08-08	1.13207e+07	0	0	0	0.6	555138	1.4055e+06	1.69811e+08	86159.8	1.79948		0	2020-08-08	0.499444		0.525	0.209723	0.0620075	0.00121152	0.15	0.6	0.525	0.500556	1.04886	100000	0.0377786	1.79863	1.17699	0.992463	0.900741	0.00121152	0.00155443	0.00121725	00:00:00	593263	00:00:00
2020-08-09	1.14041e+07	0	0	0	0.6	540026	1.37809e+06	1.71062e+08	83407.5	1.80095		0	2020-08-09	0.503124		0.525	0.203606	0.0607979	0.00120892	0.15	0.6	0.525	0.496876	1.04886	100000	0.037703	1.80022	1.17699	0.992649	0.894851	0.00120892	0.00154974	0.00121463	00:00:00	597642	00:00:00
2020-08-10	1.14847e+07	0	0	0	0.6	524343	1.34879e+06	1.72271e+08	80597.7	1.80223		0	2020-08-10	0.506679		0.525	0.197298	0.0595055	0.00120632	0.15	0.6	0.525	0.493321	1.04886	100000	0.0376276	1.80159	1.17699	0.992844	0.889078	0.00120632	0.00154507	0.00121201	00:00:00	601874	00:00:00
2020-08-11	1.15625e+07	0	0	0	0.6	508176	1.31782e+06	1.73437e+08	77745	1.80334		0	2020-08-11	0.510109		0.525	0.190832	0.0581389	0.00120374	0.15	0.6	0.525	0.489891	1.04886	100000	0.0375524	1.80279	1.17699	0.993047	0.883441	0.00120374	0.00154042	0.00120939	00:00:00	605955	00:00:00
2020-08-12	1.16373e+07	0	0	0	0.6	491612	1.28526e+06	1.7456e+08	74863.9	1.80431		0	2020-08-12	0.513412		0.525	0.184243	0.0567025	0.00120116	0.15	0.6	0.525	0.486588	1.04886	100000	0.0374773	1.80383	1.17699	0.993258	0.877955	0.00120116	0.00153578	0.00120679	00:00:00	609886	00:00:00
2020-08-13	1.17093e+07	0	0	0	0.6	474743	1.25126e+06	1.7564e+08	71969	1.80515		0	2020-08-13	0.516587		0.525	0.177565	0.0552025	0.00119859	0.15	0.6	0.525	0.483413	1.04886	100000	0.0374023	1.80473	1.17699	0.993475	0.872631	0.00119859	0.00153116	0.00120419	00:00:00	613664	00:00:00
2020-08-14	1.17784e+07	0	0	0	0.6	457657	1.21598e+06	1.76676e+08	69073.8	1.80588		0	2020-08-14	0.519635		0.525	0.170832	0.0536464	0.00119603	0.15	0.6	0.525	0.480365	1.04886	100000	0.0373275	1.80551	1.17699	0.993696	0.867481	0.00119603	0.00152657	0.0012016	00:00:00	617290	00:00:00
2020-08-15	1.18446e+07	0	0	0	0.6	440441	1.17961e+06	1.77669e+08	66191.3	1.80651		0	2020-08-15	0.522555		0.525	0.164077	0.0520416	0.00119347	0.15	0.6	0.525	0.477445	1.04886	100000	0.0372529	1.80619	1.17699	0.993921	0.862509	0.00119347	0.00152198	0.00119902	00:00:00	620766	00:00:00
2020-08-16	1.19079e+07	0	0	0	0.6	423176	1.14232e+06	1.78619e+08	63333.3	1.80706		0	2020-08-16	0.525349		0.525	0.15733	0.0503965	0.00119093	0.15	0.6	0.525	0.474651	1.04886	100000	0.0371784	1.80679	1.17699	0.994148	0.857723	0.00119093	0.00151742	0.00119644	00:00:00	624091	00:00:00
2020-08-17	1.19684e+07	0	0	0	0.6	405942	1.10431e+06	1.79526e+08	60510.7	1.80754		0	2020-08-17	0.528019		0.525	0.150621	0.0487196	0.00118839	0.15	0.6	0.525	0.471981	1.04886	100000	0.037104	1.8073	1.17699	0.994376	0.853125	0.00118839	0.00151288	0.00119388	00:00:00	627267	00:00:00
2020-08-18	1.20262e+07	0	0	0	0.6	388811	1.06576e+06	1.80392e+08	57733.1	1.80795		0	2020-08-18	0.530566		0.525	0.143976	0.047019	0.00118585	0.15	0.6	0.525	0.469434	1.04886	100000	0.0370298	1.80775	1.17699	0.994603	0.848716	0.00118585	0.00150835	0.00119132	00:00:00	630298	00:00:00
2020-08-19	1.20812e+07	0	0	0	0.6	371852	1.02686e+06	1.81217e+08	55009.4	1.80831		0	2020-08-19	0.532992		0.525	0.13742	0.0453027	0.00118333	0.15	0.6	0.525	0.467008	1.04886	100000	0.0369557	1.80813	1.17699	0.99483	0.844497	0.00118333	0.00150384	0.00118876	00:00:00	633186	00:00:00
2020-08-20	1.21335e+07	0	0	0	0.6	355125	987780	1.82003e+08	52347	1.80863		0	2020-08-20	0.535302		0.525	0.130976	0.0435785	0.00118081	0.15	0.6	0.525	0.464698	1.04886	100000	0.0368818	1.80847	1.17699	0.995055	0.840466	0.00118081	0.00149935	0.00118622	00:00:00	635935	00:00:00
2020-08-21	1.21833e+07	0	0	0	0.6	338686	948694	1.82749e+08	49752.6	1.8089		0	2020-08-21	0.537497		0.525	0.124664	0.0418541	0.0011783	0.15	0.6	0.525	0.462503	1.04886	100000	0.0368081	1.80876	1.17699	0.995277	0.836622	0.0011783	0.00149487	0.00118368	00:00:00	638547	00:00:00
2020-08-22	1.22305e+07	0	0	0	0.6	322584	909766	1.83457e+08	47231.6	1.80914		0	2020-08-22	0.539581		0.525	0.1185	0.0401367	0.00117579	0.15	0.6	0.525	0.460419	1.04886	100000	0.0367344	1.80902	1.17699	0.995495	0.832962	0.00117579	0.00149041	0.00118115	00:00:00	641026	00:00:00
2020-08-23	1.22753e+07	0	0	0	0.6	306862	871147	1.84129e+08	44788.5	1.80934		0	2020-08-23	0.541557		0.525	0.112499	0.0384329	0.00117329	0.15	0.6	0.525	0.458443	1.04886	100000	0.036661	1.80924	1.17699	0.995708	0.829482	0.00117329	0.00148597	0.00117862	00:00:00	643378	00:00:00
2020-08-24	1.23177e+07	0	0	0	0.6	291556	832976	1.84766e+08	42426.9	1.80952		0	2020-08-24	0.543428		0.525	0.106673	0.0367489	0.0011708	0.15	0.6	0.525	0.456572	1.04886	100000	0.0365876	1.80943	1.17699	0.995917	0.826177	0.0011708	0.00148155	0.00117611	00:00:00	645605	00:00:00
2020-08-25	1.23579e+07	0	0	0	0.6	276696	795381	1.85368e+08	40149.6	1.80968		0	2020-08-25	0.5452		0.525	0.101034	0.0350903	0.00116832	0.15	0.6	0.525	0.4548	1.04886	100000	0.0365145	1.8096	1.17699	0.99612	0.823042	0.00116832	0.00147714	0.0011736	00:00:00	647713	00:00:00
2020-08-26	1.23958e+07	0	0	0	0.6	262307	758475	1.85937e+08	37958.3	1.80981		0	2020-08-26	0.546874		0.525	0.0955886	0.0334621	0.00116584	0.15	0.6	0.525	0.453126	1.04886	100000	0.0364414	1.80975	1.17699	0.996318	0.820073	0.00116584	0.00147275	0.00117109	00:00:00	649706	00:00:00
2020-08-27	1.24317e+07	0	0	0	0.6	248409	722360	1.86475e+08	35854.2	1.80993		0	2020-08-27	0.548456		0.525	0.0903428	0.0318688	0.00116337	0.15	0.6	0.525	0.451544	1.04886	100000	0.0363686	1.80987	1.17699	0.996509	0.817263	0.00116337	0.00146838	0.0011686	00:00:00	651588	00:00:00
2020-08-28	1.24655e+07	0	0	0	0.6	235015	687124	1.86983e+08	33837.8	1.81003		0	2020-08-28	0.549949		0.525	0.0853007	0.0303143	0.00116091	0.15	0.6	0.525	0.450051	1.04886	100000	0.0362958	1.80998	1.17699	0.996694	0.814607	0.00116091	0.00146403	0.00116611	00:00:00	653364	00:00:00
2020-08-29	1.24974e+07	0	0	0	0.6	222136	652842	1.87461e+08	31909.1	1.81012		0	2020-08-29	0.551357		0.525	0.0804648	0.0288018	0.00115846	0.15	0.6	0.525	0.448643	1.04886	100000	0.0362232	1.81008	1.17699	0.996872	0.812098	0.00115846	0.00145969	0.00116363	00:00:00	655040	00:00:00
2020-08-30	1.25275e+07	0	0	0	0.6	209776	619576	1.87912e+08	30067.3	1.8102		0	2020-08-30	0.552683		0.525	0.0758357	0.0273342	0.00115601	0.15	0.6	0.525	0.447317	1.04886	100000	0.0361508	1.81016	1.17699	0.997043	0.809732	0.00115601	0.00145537	0.00116116	00:00:00	656618	00:00:00
2020-08-31	1.25558e+07	0	0	0	0.6	197938	587377	1.88337e+08	28311.4	1.81026		0	2020-08-31	0.553932		0.525	0.071413	0.0259137	0.00115357	0.15	0.6	0.525	0.446068	1.04886	100000	0.0360785	1.81023	1.17699	0.997208	0.807501	0.00115357	0.00145106	0.00115869	00:00:00	658105	00:00:00
2020-09-01	1.25835e+07	0	0	0	0.6	187634	557298	1.88752e+08	27654.4	1.87925		0	2020-09-01	0.555152		0.715	0.0675602	0.0245867	0.00115113	0.15	0.6	0.715	0.444848	1.04886	100000	0.0360063	1.84476	1.17699	0.997265	0.835981	0.00115113	0.00144677	0.00115623	00:00:00	659556	00:00:00
2020-09-02	1.26098e+07	0	0	0	0.6	178164	528672	1.89148e+08	26383.5	1.89653		0	2020-09-02	0.556316		0.715	0.0640218	0.0233238	0.0011487	0.15	0.6	0.715	0.443684	1.04886	100000	0.0359343	1.88789	1.17699	0.997383	0.841461	0.0011487	0.0014425	0.00115377	00:00:00	660942	00:00:00
2020-09-03	1.26351e+07	0	0	0	0.6	169596	501596	1.89527e+08	25270.7	1.91812		0	2020-09-03	0.557431		0.715	0.0608214	0.0221292	0.00114628	0.15	0.6	0.715	0.442569	1.04886	100000	0.0358624	1.90733	1.17699	0.997487	0.8489	0.00114628	0.00143824	0.00115133	00:00:00	662268	00:00:00
2020-09-04	1.26594e+07	0	0	0	0.6	162020	476176	1.89892e+08	24332.4	1.94508		0	2020-09-04	0.558505		0.715	0.057988	0.0210077	0.00114387	0.15	0.6	0.715	0.441495	1.04886	100000	0.0357907	1.9316	1.17699	0.997574	0.858745	0.00114387	0.001434	0.00114889	00:00:00	663546	00:00:00
2020-09-05	1.26828e+07	0	0	0	0.6	155337	452329	1.90242e+08	23385.1	1.96154		0	2020-09-05	0.559536		0.715	0.0554852	0.0199557	0.00114146	0.15	0.6	0.715	0.440464	1.04886	100000	0.0357191	1.95331	1.17699	0.997663	0.863987	0.00114146	0.00142978	0.00114646	00:00:00	664773	00:00:00
2020-09-06	1.27054e+07	0	0	0	0.6	149580	430094	1.90581e+08	22553.6	1.97779		0	2020-09-06	0.560531		0.715	0.0533217	0.0189747	0.00113906	0.15	0.6	0.715	0.439469	1.04886	100000	0.0356477	1.96967	1.17699	0.997741	0.869177	0.00113906	0.00142557	0.00114403	00:00:00	665958	00:00:00
2020-09-07	1.27272e+07	0	0	0	0.6	143757	409499	1.90908e+08	21832	1.99271		0	2020-09-07	0.561494		0.715	0.0511436	0.0180661	0.00113667	0.15	0.6	0.715	0.438506	1.04886	100000	0.0355764	1.98525	1.17699	0.997808	0.873814	0.00113667	0.00142138	0.00114161	00:00:00	667104	00:00:00
2020-09-08	1.27483e+07	0	0	0	0.6	138435	390411	1.91224e+08	21061.3	2.00462		0	2020-09-08	0.562424		0.715	0.0491517	0.017224	0.00113428	0.15	0.6	0.715	0.437576	1.04886	100000	0.0355052	1.99866	1.17699	0.997881	0.877173	0.00113428	0.0014172	0.0011392	00:00:00	668209	00:00:00
2020-09-09	1.27686e+07	0	0	0	0.6	133512	372800	1.91529e+08	20347.3	2.01539		0	2020-09-09	0.563321		0.715	0.0473088	0.0164471	0.0011319	0.15	0.6	0.715	0.436679	1.04886	100000	0.0354342	2.01	1.17699	0.997949	0.880076	0.0011319	0.00141304	0.00113679	00:00:00	669278	00:00:00
2020-09-10	1.27883e+07	0	0	0	0.6	128854	356620	1.91824e+08	19674.7	2.02478		0	2020-09-10	0.564189		0.715	0.0455671	0.0157333	0.00112952	0.15	0.6	0.715	0.435811	1.04886	100000	0.0353634	2.02008	1.17699	0.998012	0.882422	0.00112952	0.0014089	0.0011344	00:00:00	670311	00:00:00
2020-09-11	1.28073e+07	0	0	0	0.6	124494	341808	1.9211e+08	19025.6	2.0328		0	2020-09-11	0.565029		0.715	0.0439374	0.0150798	0.00112716	0.15	0.6	0.715	0.434971	1.04886	100000	0.0352926	2.02879	1.17699	0.998074	0.884211	0.00112716	0.00140477	0.001132	00:00:00	671309	00:00:00
2020-09-12	1.28257e+07	0	0	0	0.6	120351	328309	1.92386e+08	18410.2	2.03985		0	2020-09-12	0.565841		0.715	0.0423901	0.0144842	0.0011248	0.15	0.6	0.715	0.434159	1.04886	100000	0.0352221	2.03633	1.17699	0.998133	0.885619	0.0011248	0.00140065	0.00112962	00:00:00	672276	00:00:00
2020-09-13	1.28435e+07	0	0	0	0.6	116337	316060	1.92653e+08	17817.5	2.04596		0	2020-09-13	0.566627		0.715	0.0408942	0.0139438	0.00112244	0.15	0.6	0.715	0.433373	1.04886	100000	0.0351516	2.04291	1.17699	0.998189	0.886666	0.00112244	0.00139656	0.00112724	00:00:00	673211	00:00:00
2020-09-14	1.28608e+07	0	0	0	0.6	112512	304985	1.92912e+08	17236.4	2.05126		0	2020-09-14	0.567387		0.715	0.0394706	0.0134552	0.00112009	0.15	0.6	0.715	0.432613	1.04886	100000	0.0350813	2.04861	1.17699	0.998245	0.887401	0.00112009	0.00139247	0.00112487	00:00:00	674116	00:00:00
2020-09-15	1.28775e+07	0	0	0	0.6	108842	294008	1.93162e+08	16677.9	2.05587		0	2020-09-15	0.568123		0.715	0.0381069	0.0129709	0.00111775	0.15	0.6	0.715	0.431877	1.04886	100000	0.0350111	2.05357	1.17699	0.998299	0.887884	0.00111775	0.0013884	0.0011225	00:00:00	674992	00:00:00
2020-09-16	1.28936e+07	0	0	0	0.6	105306	283763	1.93404e+08	16138	2.05988		0	2020-09-16	0.568835		0.715	0.036795	0.0125189	0.00111542	0.15	0.6	0.715	0.431165	1.04886	100000	0.0349411	2.05788	1.17699	0.998351	0.888148	0.00111542	0.00138435	0.00112014	00:00:00	675839	00:00:00
2020-09-17	1.29092e+07	0	0	0	0.6	101894	274106	1.93638e+08	15614.2	2.06336		0	2020-09-17	0.569524		0.715	0.0355317	0.0120929	0.00111309	0.15	0.6	0.715	0.430476	1.04886	100000	0.0348712	2.06162	1.17699	0.998402	0.888227	0.00111309	0.00138032	0.00111779	00:00:00	676659	00:00:00
2020-09-18	1.29243e+07	0	0	0	0.6	98590.2	264880	1.93865e+08	15106.3	2.06638		0	2020-09-18	0.57019		0.715	0.0343109	0.0116859	0.00111077	0.15	0.6	0.715	0.42981	1.04886	100000	0.0348015	2.06487	1.17699	0.998452	0.888152	0.00111077	0.00137629	0.00111545	00:00:00	677452	00:00:00
2020-09-19	1.29389e+07	0	0	0	0.6	95385.2	256107	1.94084e+08	14612.4	2.06901		0	2020-09-19	0.570835		0.715	0.0331291	0.0112988	0.00110845	0.15	0.6	0.715	0.429165	1.04886	100000	0.0347319	2.0677	1.17699	0.9985	0.887947	0.00110845	0.00137229	0.00111311	00:00:00	678219	00:00:00
2020-09-20	1.29531e+07	0	0	0	0.6	92280.5	247685	1.94296e+08	14131.7	2.0713		0	2020-09-20	0.571459		0.715	0.0319867	0.0109273	0.00110614	0.15	0.6	0.715	0.428541	1.04886	100000	0.0346624	2.07015	1.17699	0.998547	0.887636	0.00110614	0.00136829	0.00111077	00:00:00	678961	00:00:00
2020-09-21	1.29667e+07	0	0	0	0.6	89267.5	239518	1.94501e+08	13665	2.07328		0	2020-09-21	0.572061		0.715	0.0308804	0.010567	0.00110384	0.15	0.6	0.715	0.427939	1.04886	100000	0.0345931	2.07229	1.17699	0.998593	0.887236	0.00110384	0.00136432	0.00110845	00:00:00	679678	00:00:00
2020-09-22	1.29799e+07	0	0	0	0.6	86340.8	231668	1.94699e+08	13211.2	2.075		0	2020-09-22	0.572644		0.715	0.0298082	0.0102207	0.00110154	0.15	0.6	0.715	0.427356	1.04886	100000	0.0345239	2.07414	1.17699	0.998638	0.886764	0.00110154	0.00136035	0.00110613	00:00:00	680372	00:00:00
2020-09-23	1.29927e+07	0	0	0	0.6	83496.5	224091	1.94891e+08	12769.9	2.0765		0	2020-09-23	0.573208		0.715	0.0287686	0.00988636	0.00109925	0.15	0.6	0.715	0.426792	1.04886	100000	0.0344549	2.07575	1.17699	0.998682	0.886234	0.00109925	0.00135641	0.00110381	00:00:00	681042	00:00:00
2020-09-24	1.3005e+07	0	0	0	0.6	80730.8	216757	1.95076e+08	12340.6	2.0778		0	2020-09-24	0.573752		0.715	0.0277601	0.0095628	0.00109697	0.15	0.6	0.715	0.426248	1.04886	100000	0.034386	2.07715	1.17699	0.998724	0.885658	0.00109697	0.00135247	0.00110151	00:00:00	681690	00:00:00
2020-09-25	1.3017e+07	0	0	0	0.6	78041.6	209654	1.95255e+08	11923.1	2.07893		0	2020-09-25	0.574278		0.715	0.0267817	0.00924946	0.00109469	0.15	0.6	0.715	0.425722	1.04886	100000	0.0343172	2.07837	1.17699	0.998766	0.885047	0.00109469	0.00134855	0.00109921	00:00:00	682316	00:00:00
2020-09-26	1.30285e+07	0	0	0	0.6	75427	202761	1.95427e+08	11517.2	2.07991		0	2020-09-26	0.574786		0.715	0.0258327	0.00894535	0.00109242	0.15	0.6	0.715	0.425214	1.04886	100000	0.0342486	2.07942	1.17699	0.998806	0.884408	0.00109242	0.00134465	0.00109691	00:00:00	682921	00:00:00
2020-09-27	1.30396e+07	0	0	0	0.6	72884.6	196067	1.95594e+08	11122.6	2.08077		0	2020-09-27	0.575277		0.715	0.024912	0.00864999	0.00109015	0.15	0.6	0.715	0.424723	1.04886	100000	0.0341801	2.08034	1.17699	0.998846	0.88375	0.00109015	0.00134076	0.00109462	00:00:00	683505	00:00:00
2020-09-28	1.30504e+07	0	0	0	0.6	70412.6	189569	1.95755e+08	10739.1	2.08151		0	2020-09-28	0.575751		0.715	0.0240189	0.00836335	0.00108789	0.15	0.6	0.715	0.424249	1.04886	100000	0.0341117	2.08114	1.17699	0.998884	0.883079	0.00108789	0.00133688	0.00109234	00:00:00	684069	00:00:00
2020-09-29	1.30607e+07	0	0	0	0.6	68009.2	183258	1.95911e+08	10366.5	2.08215		0	2020-09-29	0.576208		0.715	0.0231527	0.0080849	0.00108564	0.15	0.6	0.715	0.423792	1.04886	100000	0.0340435	2.08183	1.17699	0.998922	0.8824	0.00108564	0.00133302	0.00109007	00:00:00	684613	00:00:00
2020-09-30	1.30707e+07	0	0	0	0.6	65673.1	177124	1.96061e+08	10004.6	2.08271		0	2020-09-30	0.576649		0.715	0.0223127	0.00781431	0.00108339	0.15	0.6	0.715	0.423351	1.04886	100000	0.0339754	2.08243	1.17699	0.998959	0.881718	0.00108339	0.00132917	0.0010878	00:00:00	685138	00:00:00
2020-10-01	1.30804e+07	0	0	0	0.6	63403.1	171163	1.96206e+08	9653.12	2.0832		0	2020-10-01	0.577075		0.715	0.0214984	0.00755133	0.00108115	0.15	0.6	0.715	0.422925	1.04886	100000	0.0339074	2.08296	1.17699	0.998994	0.881037	0.00108115	0.00132534	0.00108553	00:00:00	685645	00:00:00
2020-10-02	1.30897e+07	0	0	0	0.6	61197.9	165369	1.96345e+08	9311.97	2.08362		0	2020-10-02	0.577486		0.715	0.0207091	0.00729569	0.00107892	0.15	0.6	0.715	0.422514	1.04886	100000	0.0338396	2.08341	1.17699	0.999029	0.88036	0.00107892	0.00132152	0.00108328	00:00:00	686134	00:00:00
2020-10-03	1.30987e+07	0	0	0	0.6	59056.3	159738	1.9648e+08	8980.95	2.08399		0	2020-10-03	0.577882		0.715	0.0199444	0.00704725	0.00107669	0.15	0.6	0.715	0.422118	1.04886	100000	0.0337719	2.08381	1.17699	0.999062	0.879689	0.00107669	0.00131772	0.00108103	00:00:00	686605	00:00:00
2020-10-04	1.31073e+07	0	0	0	0.6	56977	154266	1.9661e+08	8659.85	2.08431		0	2020-10-04	0.578264		0.715	0.0192038	0.00680584	0.00107447	0.15	0.6	0.715	0.421736	1.04886	100000	0.0337044	2.08415	1.17699	0.999095	0.879027	0.00107447	0.00131393	0.00107878	00:00:00	687060	00:00:00
2020-10-05	1.31157e+07	0	0	0	0.6	54959	148949	1.96735e+08	8348.5	2.08459		0	2020-10-05	0.578633		0.715	0.0184865	0.00657129	0.00107225	0.15	0.6	0.715	0.421367	1.04886	100000	0.033637	2.08445	1.17699	0.999127	0.878377	0.00107225	0.00131015	0.00107654	00:00:00	687498	00:00:00
2020-10-06	1.31237e+07	0	0	0	0.6	53001.1	143785	1.96856e+08	8046.71	2.08483		0	2020-10-06	0.578988		0.715	0.0177923	0.00634344	0.00107004	0.15	0.6	0.715	0.421012	1.04886	100000	0.0335697	2.08471	1.17699	0.999158	0.877738	0.00107004	0.00130638	0.00107431	00:00:00	687921	00:00:00
2020-10-07	1.31315e+07	0	0	0	0.6	51102.3	138769	1.96972e+08	7754.29	2.08504		0	2020-10-07	0.57933		0.715	0.0171206	0.00612217	0.00106784	0.15	0.6	0.715	0.42067	1.04886	100000	0.0335026	2.08493	1.17699	0.999187	0.877113	0.00106784	0.00130263	0.00107208	00:00:00	688328	00:00:00
2020-10-08	1.31389e+07	0	0	0	0.6	49261.4	133900	1.97084e+08	7471.06	2.08522		0	2020-10-08	0.579659		0.715	0.0164708	0.00590733	0.00106564	0.15	0.6	0.715	0.420341	1.04886	100000	0.0334356	2.08513	1.17699	0.999216	0.876502	0.00106564	0.0012989	0.00106986	00:00:00	688720	00:00:00
2020-10-09	1.31461e+07	0	0	0	0.6	47477.2	129173	1.97192e+08	7196.82	2.08538		0	2020-10-09	0.579977		0.715	0.0158425	0.00569882	0.00106344	0.15	0.6	0.715	0.420023	1.04886	100000	0.0333687	2.0853	1.17699	0.999245	0.875906	0.00106344	0.00129518	0.00106765	00:00:00	689098	00:00:00
2020-10-10	1.31531e+07	0	0	0	0.6	45748.8	124587	1.97296e+08	6931.39	2.08551		0	2020-10-10	0.580283		0.715	0.0152352	0.00549651	0.00106126	0.15	0.6	0.715	0.419717	1.04886	100000	0.033302	2.08545	1.17699	0.999272	0.875326	0.00106126	0.00129147	0.00106544	00:00:00	689462	00:00:00
2020-10-11	1.31598e+07	0	0	0	0.6	44074.8	120139	1.97396e+08	6674.57	2.08563		0	2020-10-11	0.580577		0.715	0.0146484	0.00530027	0.00105908	0.15	0.6	0.715	0.419423	1.04886	100000	0.0332354	2.08557	1.17699	0.999298	0.874762	0.00105908	0.00128777	0.00106324	00:00:00	689812	00:00:00
2020-10-12	1.31662e+07	0	0	0	0.6	42454.3	115826	1.97493e+08	6426.15	2.08574		0	2020-10-12	0.580861		0.715	0.0140816	0.00510999	0.0010569	0.15	0.6	0.715	0.419139	1.04886	100000	0.0331689	2.08569	1.17699	0.999324	0.874214	0.0010569	0.00128409	0.00106104	00:00:00	690150	00:00:00
2020-10-13	1.31724e+07	0	0	0	0.6	40886	111646	1.97585e+08	6185.96	2.08583		0	2020-10-13	0.581134		0.715	0.0135343	0.00492556	0.00105473	0.15	0.6	0.715	0.418866	1.04886	100000	0.0331026	2.08578	1.17699	0.999349	0.873683	0.00105473	0.00128042	0.00105885	00:00:00	690474	00:00:00
2020-10-14	1.31783e+07	0	0	0	0.6	39368.7	107595	1.97675e+08	5953.78	2.08591		0	2020-10-14	0.581396		0.715	0.013006	0.00474684	0.00105257	0.15	0.6	0.715	0.418604	1.04886	100000	0.0330363	2.08587	1.17699	0.999373	0.873168	0.00105257	0.00127676	0.00105667	00:00:00	690787	00:00:00
2020-10-15	1.3184e+07	0	0	0	0.6	37901.3	103671	1.97761e+08	5729.43	2.08597		0	2020-10-15	0.581649		0.715	0.0124962	0.00457374	0.00105041	0.15	0.6	0.715	0.418351	1.04886	100000	0.0329703	2.08594	1.17699	0.999396	0.872669	0.00105041	0.00127312	0.00105449	00:00:00	691088	00:00:00
2020-10-16	1.31896e+07	0	0	0	0.6	36482.6	99872.2	1.97843e+08	5512.7	2.08603		0	2020-10-16	0.581892		0.715	0.0120044	0.00440612	0.00104826	0.15	0.6	0.715	0.418108	1.04886	100000	0.0329043	2.086	1.17699	0.999419	0.872186	0.00104826	0.00126949	0.00105232	00:00:00	691377	00:00:00
2020-10-17	1.31949e+07	0	0	0	0.6	35111.4	96194.6	1.97923e+08	5303.4	2.08608		0	2020-10-17	0.582126		0.715	0.0115301	0.00424388	0.00104611	0.15	0.6	0.715	0.417874	1.04886	100000	0.0328385	2.08606	1.17699	0.99944	0.87172	0.00104611	0.00126587	0.00105015	00:00:00	691656	00:00:00
2020-10-18	1.32e+07	0	0	0	0.6	33786.6	92636.1	1.97999e+08	5101.33	2.08613		0	2020-10-18	0.582351		0.715	0.0110728	0.00408689	0.00104397	0.15	0.6	0.715	0.417649	1.04886	100000	0.0327729	2.08611	1.17699	0.999461	0.871269	0.00104397	0.00126227	0.00104799	00:00:00	691923	00:00:00
2020-10-19	1.32049e+07	0	0	0	0.6	32506.9	89193.9	1.98073e+08	4906.29	2.08617		0	2020-10-19	0.582568		0.715	0.0106321	0.00393502	0.00104184	0.15	0.6	0.715	0.417432	1.04886	100000	0.0327073	2.08615	1.17699	0.999482	0.870833	0.00104184	0.00125868	0.00104583	00:00:00	692181	00:00:00
2020-10-20	1.32096e+07	0	0	0	0.6	31271.2	85865.3	1.98144e+08	4718.1	2.0862		0	2020-10-20	0.582776		0.715	0.0102075	0.00378817	0.00103971	0.15	0.6	0.715	0.417224	1.04886	100000	0.0326419	2.08618	1.17699	0.999501	0.870413	0.00103971	0.0012551	0.00104368	00:00:00	692429	00:00:00
2020-10-21	1.32141e+07	0	0	0	0.6	30078.4	82647.5	1.98212e+08	4536.55	2.08623		0	2020-10-21	0.582976		0.715	0.00979851	0.00364621	0.00103759	0.15	0.6	0.715	0.417024	1.04886	100000	0.0325766	2.08622	1.17699	0.99952	0.870008	0.00103759	0.00125153	0.00104154	00:00:00	692667	00:00:00
2020-10-22	1.32185e+07	0	0	0	0.6	28927.1	79537.9	1.98277e+08	4361.46	2.08626		0	2020-10-22	0.583169		0.715	0.00940463	0.00350903	0.00103547	0.15	0.6	0.715	0.416831	1.04886	100000	0.0325115	2.08624	1.17699	0.999539	0.869617	0.00103547	0.00124798	0.0010394	00:00:00	692896	00:00:00
2020-10-23	1.32227e+07	0	0	0	0.6	27816.4	76533.7	1.9834e+08	4192.63	2.08628		0	2020-10-23	0.583353		0.715	0.00902541	0.00337649	0.00103336	0.15	0.6	0.715	0.416647	1.04886	100000	0.0324464	2.08627	1.17699	0.999556	0.86924	0.00103336	0.00124444	0.00103727	00:00:00	693116	00:00:00
2020-10-24	1.32267e+07	0	0	0	0.6	26744.9	73632.2	1.98401e+08	4029.89	2.0863		0	2020-10-24	0.583531		0.715	0.00866041	0.00324848	0.00103125	0.15	0.6	0.715	0.416469	1.04886	100000	0.0323815	2.08629	1.17699	0.999573	0.868877	0.00103125	0.00124091	0.00103514	00:00:00	693327	00:00:00
2020-10-25	1.32306e+07	0	0	0	0.6	25711.7	70830.7	1.98459e+08	3873.04	2.08631		0	2020-10-25	0.583702		0.715	0.00830918	0.00312488	0.00102915	0.15	0.6	0.715	0.416298	1.04886	100000	0.0323168	2.08631	1.17699	0.99959	0.868528	0.00102915	0.0012374	0.00103302	00:00:00	693531	00:00:00
2020-10-26	1.32343e+07	0	0	0	0.6	24715.5	68126.5	1.98515e+08	3721.91	2.08633		0	2020-10-26	0.583866		0.715	0.00797127	0.00300558	0.00102705	0.15	0.6	0.715	0.416134	1.04886	100000	0.0322521	2.08632	1.17699	0.999606	0.868191	0.00102705	0.0012339	0.0010309	00:00:00	693726	00:00:00
2020-10-27	1.32379e+07	0	0	0	0.6	23755.2	65516.8	1.98568e+08	3576.31	2.08634		0	2020-10-27	0.584024		0.715	0.00764625	0.00289045	0.00102496	0.15	0.6	0.715	0.415976	1.04886	100000	0.0321876	2.08633	1.17699	0.999621	0.867867	0.00102496	0.00123041	0.00102879	00:00:00	693914	00:00:00
2020-10-28	1.32413e+07	0	0	0	0.6	22829.9	62999.1	1.9862e+08	3436.08	2.08635		0	2020-10-28	0.584176		0.715	0.0073337	0.00277937	0.00102288	0.15	0.6	0.715	0.415824	1.04886	100000	0.0321233	2.08635	1.17699	0.999636	0.867556	0.00102288	0.00122693	0.00102669	00:00:00	694094	00:00:00
2020-10-29	1.32446e+07	0	0	0	0.6	21938.3	60570.7	1.98669e+08	3301.05	2.08636		0	2020-10-29	0.584321		0.715	0.0070332	0.00267224	0.0010208	0.15	0.6	0.715	0.415679	1.04886	100000	0.032059	2.08636	1.17699	0.99965	0.867256	0.0010208	0.00122347	0.00102459	00:00:00	694268	00:00:00
2020-10-30	1.32478e+07	0	0	0	0.6	21079.4	58229.1	1.98717e+08	3171.03	2.08637		0	2020-10-30	0.584461		0.715	0.00674434	0.00256893	0.00101873	0.15	0.6	0.715	0.415539	1.04886	100000	0.0319949	2.08637	1.17699	0.999663	0.866967	0.00101873	0.00122001	0.0010225	00:00:00	694434	00:00:00
2020-10-31	1.32508e+07	0	0	0	0.6	20252.3	55971.5	1.98763e+08	3045.87	2.08638		0	2020-10-31	0.584596		0.715	0.00646673	0.00246933	0.00101666	0.15	0.6	0.715	0.415404	1.04886	100000	0.0319309	2.08637	1.17699	0.999677	0.86669	0.00101666	0.00121657	0.00102041	00:00:00	694594	00:00:00
2020-11-01	1.32538e+07	0	0	0	0.6	19455.8	53795.6	1.98806e+08	2925.41	2.08638		0	2020-11-01	0.584725		0.715	0.00619998	0.00237334	0.0010146	0.15	0.6	0.715	0.415275	1.04886	100000	0.031867	2.08638	1.17699	0.999689	0.866423	0.0010146	0.00121314	0.00101833	00:00:00	694748	00:00:00
2020-11-02	1.32566e+07	0	0	0	0.6	18688.9	51698.8	1.98849e+08	2809.49	2.08639		0	2020-11-02	0.584849		0.715	0.0059437	0.00228083	0.00101254	0.15	0.6	0.715	0.415151	1.04886	100000	0.0318033	2.08639	1.17699	0.999702	0.866167	0.00101254	0.00120973	0.00101625	00:00:00	694895	00:00:00
2020-11-03	1.32593e+07	0	0	0	0.6	17950.8	49678.7	1.98889e+08	2697.96	2.08639		0	2020-11-03	0.584968		0.715	0.00569754	0.00219171	0.00101049	0.15	0.6	0.715	0.415032	1.04886	100000	0.0317397	2.08639	1.17699	0.999713	0.865921	0.00101049	0.00120632	0.00101418	00:00:00	695037	00:00:00
2020-11-04	1.32619e+07	0	0	0	0.6	17240.4	47732.8	1.98928e+08	2590.67	2.0864		0	2020-11-04	0.585082		0.715	0.00546112	0.00210586	0.00100844	0.15	0.6	0.715	0.414918	1.04886	100000	0.0316762	2.0864	1.17699	0.999725	0.865684	0.00100844	0.00120293	0.00101212	00:00:00	695173	00:00:00
2020-11-05	1.32643e+07	0	0	0	0.6	16556.9	45858.8	1.98965e+08	2487.47	2.0864		0	2020-11-05	0.585192		0.715	0.0052341	0.00202318	0.0010064	0.15	0.6	0.715	0.414808	1.04886	100000	0.0316129	2.0864	1.17699	0.999736	0.865456	0.0010064	0.00119955	0.00101006	00:00:00	695303	00:00:00
2020-11-06	1.32667e+07	0	0	0	0.6	15899.2	44054.4	1.99001e+08	2388.21	2.0864		0	2020-11-06	0.585297		0.715	0.00501615	0.00194358	0.00100437	0.15	0.6	0.715	0.414703	1.04886	100000	0.0315496	2.0864	1.17699	0.999746	0.865238	0.00100437	0.00119618	0.001008	00:00:00	695429	00:00:00
2020-11-07	1.3269e+07	0	0	0	0.6	15266.6	42317.3	1.99035e+08	2292.77	2.08641		0	2020-11-07	0.585398		0.715	0.00480692	0.00186694	0.00100234	0.15	0.6	0.715	0.414602	1.04886	100000	0.0314865	2.08641	1.17699	0.999756	0.865028	0.00100234	0.00119282	0.00100595	00:00:00	695549	00:00:00
2020-11-08	1.32712e+07	0	0	0	0.6	14658.1	40645.2	1.99068e+08	2201	2.08641		0	2020-11-08	0.585495		0.715	0.00460609	0.00179317	0.00100031	0.15	0.6	0.715	0.414505	1.04886	100000	0.0314236	2.08641	1.17699	0.999766	0.864826	0.00100031	0.00118948	0.00100391	00:00:00	695665	00:00:00
2020-11-09	1.32733e+07	0	0	0	0.6	14072.9	39036.1	1.991e+08	2112.78	2.08641		0	2020-11-09	0.585589		0.715	0.00441337	0.00172218	0.000998294	0.15	0.6	0.715	0.414411	1.04886	100000	0.0313607	2.08641	1.17699	0.999775	0.864633	0.000998294	0.00118614	0.00100187	00:00:00	695776	00:00:00
2020-11-10	1.32754e+07	0	0	0	0.6	13510.2	37487.8	1.99131e+08	2027.98	2.08641		0	2020-11-10	0.585678		0.715	0.00422843	0.00165387	0.00099628	0.15	0.6	0.715	0.414322	1.04886	100000	0.031298	2.08641	1.17699	0.999784	0.864447	0.00099628	0.00118282	0.000999837	00:00:00	695882	00:00:00
2020-11-11	1.32773e+07	0	0	0	0.6	12969.2	35998.2	1.9916e+08	1946.48	2.08641		0	2020-11-11	0.585764		0.715	0.00405099	0.00158816	0.000994271	0.15	0.6	0.715	0.414236	1.04886	100000	0.0312354	2.08641	1.17699	0.999793	0.864268	0.000994271	0.00117951	0.000997809	00:00:00	695984	00:00:00
2020-11-12	1.32792e+07	0	0	0	0.6	12449.2	34565.3	1.99188e+08	1868.15	2.08642		0	2020-11-12	0.585846		0.715	0.00388077	0.00152494	0.000992267	0.15	0.6	0.715	0.414154	1.04886	100000	0.0311729	2.08641	1.17699	0.999801	0.864097	0.000992267	0.00117621	0.000995787	00:00:00	696082	00:00:00
2020-11-13	1.3281e+07	0	0	0	0.6	11949.3	33187.1	1.99215e+08	1792.88	2.08642		0	2020-11-13	0.585925		0.715	0.00371749	0.00146414	0.000990269	0.15	0.6	0.715	0.414075	1.04886	100000	0.0311106	2.08642	1.17699	0.999809	0.863932	0.000990269	0.00117292	0.00099377	00:00:00	696176	00:00:00
2020-11-14	1.32827e+07	0	0	0	0.6	11468.8	31861.8	1.9924e+08	1720.56	2.08642		0	2020-11-14	0.586001		0.715	0.00356089	0.00140567	0.000988276	0.15	0.6	0.715	0.413999	1.04886	100000	0.0310484	2.08642	1.17699	0.999817	0.863774	0.000988276	0.00116965	0.000991758	00:00:00	696267	00:00:00
2020-11-15	1.32843e+07	0	0	0	0.6	11007.1	30587.5	1.99265e+08	1651.08	2.08642		0	2020-11-15	0.586074		0.715	0.0034107	0.00134945	0.000986287	0.15	0.6	0.715	0.413926	1.04886	100000	0.0309863	2.08642	1.17699	0.999824	0.863623	0.000986287	0.00116638	0.000989751	00:00:00	696353	00:00:00
2020-11-16	1.32859e+07	0	0	0	0.6	10563.5	29362.3	1.99289e+08	1584.34	2.08642		0	2020-11-16	0.586144		0.715	0.00326669	0.0012954	0.000984305	0.15	0.6	0.715	0.413856	1.04886	100000	0.0309243	2.08642	1.17699	0.999831	0.863477	0.000984305	0.00116313	0.00098775	00:00:00	696437	00:00:00
2020-11-17	1.32875e+07	0	0	0	0.6	10137.2	28184.6	1.99312e+08	1520.22	2.08642		0	2020-11-17	0.586211		0.715	0.0031286	0.00124344	0.000982327	0.15	0.6	0.715	0.413789	1.04886	100000	0.0308625	2.08642	1.17699	0.999838	0.863337	0.000982327	0.00115989	0.000985753	00:00:00	696516	00:00:00
2020-11-18	1.32889e+07	0	0	0	0.6	9727.73	27052.6	1.99334e+08	1458.64	2.08642		0	2020-11-18	0.586275		0.715	0.00299621	0.0011935	0.000980354	0.15	0.6	0.715	0.413725	1.04886	100000	0.0308007	2.08642	1.17699	0.999844	0.863203	0.000980354	0.00115666	0.000983762	00:00:00	696593	00:00:00
2020-11-19	1.32903e+07	0	0	0	0.6	9334.35	25964.6	1.99355e+08	1399.5	2.08642		0	2020-11-19	0.586337		0.715	0.0028693	0.0011455	0.000978387	0.15	0.6	0.715	0.413663	1.04886	100000	0.0307391	2.08642	1.17699	0.999851	0.863075	0.000978387	0.00115344	0.000981776	00:00:00	696667	00:00:00
2020-11-20	1.32917e+07	0	0	0	0.6	8956.49	24919.1	1.99375e+08	1342.71	2.08642		0	2020-11-20	0.586396		0.715	0.00274764	0.00109937	0.000976424	0.15	0.6	0.715	0.413604	1.04886	100000	0.0306776	2.08642	1.17699	0.999857	0.862951	0.000976424	0.00115023	0.000979796	00:00:00	696737	00:00:00
2020-11-21	1.32929e+07	0	0	0	0.6	8593.58	23914.5	1.99394e+08	1288.17	2.08642		0	2020-11-21	0.586453		0.715	0.00263104	0.00105505	0.000974467	0.15	0.6	0.715	0.413547	1.04886	100000	0.0306163	2.08642	1.17699	0.999863	0.862833	0.000974467	0.00114703	0.00097782	00:00:00	696805	00:00:00
2020-11-22	1.32942e+07	0	0	0	0.6	8245.05	22949.3	1.99413e+08	1235.8	2.08642		0	2020-11-22	0.586508		0.715	0.00251928	0.00101247	0.000972514	0.15	0.6	0.715	0.413492	1.04886	100000	0.0305551	2.08642	1.17699	0.999868	0.862719	0.000972514	0.00114385	0.00097585	00:00:00	696870	00:00:00
2020-11-23	1.32954e+07	0	0	0	0.6	7910.35	22022.1	1.9943e+08	1185.53	2.08642		0	2020-11-23	0.58656		0.715	0.00241218	0.000971561	0.000970567	0.15	0.6	0.715	0.41344	1.04886	100000	0.030494	2.08642	1.17699	0.999874	0.86261	0.000970567	0.00114067	0.000973884	00:00:00	696932	00:00:00
2020-11-24	1.32965e+07	0	0	0	0.6	7588.97	21131.3	1.99447e+08	1137.26	2.08642		0	2020-11-24	0.58661		0.715	0.00230955	0.000932265	0.000968625	0.15	0.6	0.715	0.41339	1.04886	100000	0.030433	2.08642	1.17699	0.999879	0.862506	0.000968625	0.0011375	0.000971924	00:00:00	696991	00:00:00
2020-11-25	1.32976e+07	0	0	0	0.6	7280.39	20275.8	1.99464e+08	1090.92	2.08642		0	2020-11-25	0.586658		0.715	0.00221121	0.000894519	0.000966687	0.15	0.6	0.715	0.413342	1.04886	100000	0.0303721	2.08642	1.17699	0.999884	0.862405	0.000966687	0.00113435	0.000969969	00:00:00	697049	00:00:00
2020-11-26	1.32986e+07	0	0	0	0.6	6984.12	19454.1	1.9948e+08	1046.44	2.08642		0	2020-11-26	0.586705		0.715	0.00211698	0.000858267	0.000964755	0.15	0.6	0.715	0.413295	1.04886	100000	0.0303114	2.08642	1.17699	0.999888	0.862309	0.000964755	0.00113121	0.000968019	00:00:00	697104	00:00:00
2020-11-27	1.32996e+07	0	0	0	0.6	6699.7	18664.9	1.99495e+08	1003.75	2.08642		0	2020-11-27	0.586749		0.715	0.00202671	0.000823453	0.000962828	0.15	0.6	0.715	0.413251	1.04886	100000	0.0302507	2.08642	1.17699	0.999893	0.862217	0.000962828	0.00112808	0.000966074	00:00:00	697156	00:00:00
2020-11-28	1.33006e+07	0	0	0	0.6	6426.66	17907.1	1.99509e+08	962.766	2.08642		0	2020-11-28	0.586791		0.715	0.00194022	0.00079002	0.000960905	0.15	0.6	0.715	0.413209	1.04886	100000	0.0301902	2.08642	1.17699	0.999897	0.862128	0.000960905	0.00112495	0.000964134	00:00:00	697207	00:00:00
2020-11-29	1.33015e+07	0	0	0	0.6	6164.57	17179.5	1.99523e+08	923.434	2.08642		0	2020-11-29	0.586832		0.715	0.00185737	0.000757918	0.000958988	0.15	0.6	0.715	0.413168	1.04886	100000	0.0301298	2.08642	1.17699	0.999901	0.862043	0.000958988	0.00112184	0.000962199	00:00:00	697255	00:00:00
2020-11-30	1.33024e+07	0	0	0	0.6	5913	16480.8	1.99536e+08	885.687	2.08642		0	2020-11-30	0.586871		0.715	0.00177801	0.000727096	0.000957075	0.15	0.6	0.715	0.413129	1.04886	100000	0.0300696	2.08642	1.17699	0.999905	0.861962	0.000957075	0.00111874	0.000960268	00:00:00	697302	00:00:00
2020-12-01	1.33033e+07	0	0	0	0.6	5671.54	15810.1	1.99549e+08	849.463	2.08642		0	2020-12-01	0.586909		0.715	0.001702	0.000697503	0.000955167	0.15	0.6	0.715	0.413091	1.04886	100000	0.0300094	2.08642	1.17699	0.999909	0.861884	0.000955167	0.00111565	0.000958343	00:00:00	697346	00:00:00
2020-12-02	1.33041e+07	0	0	0	0.6	5439.8	15166.1	1.99561e+08	814.701	2.08642		0	2020-12-02	0.586945		0.715	0.00162919	0.000669094	0.000953264	0.15	0.6	0.715	0.413055	1.04886	100000	0.0299494	2.08642	1.17699	0.999913	0.861809	0.000953264	0.00111257	0.000956423	00:00:00	697389	00:00:00
2020-12-03	1.33049e+07	0	0	0	0.6	5217.39	14548	1.99573e+08	781.344	2.08642		0	2020-12-03	0.586979		0.715	0.00155945	0.000641822	0.000951366	0.15	0.6	0.715	0.413021	1.04886	100000	0.0298895	2.08642	1.17699	0.999917	0.861737	0.000951366	0.0011095	0.000954508	00:00:00	697430	00:00:00
2020-12-04	1.33056e+07	0	0	0	0.6	5003.97	13954.6	1.99584e+08	749.337	2.08642		0	2020-12-04	0.587012		0.715	0.00149267	0.000615644	0.000949473	0.15	0.6	0.715	0.412988	1.04886	100000	0.0298298	2.08642	1.17699	0.99992	0.861668	0.000949473	0.00110645	0.000952597	00:00:00	697470	00:00:00
2020-12-05	1.33063e+07	0	0	0	0.6	4799.16	13385.1	1.99595e+08	718.626	2.08642		0	2020-12-05	0.587044		0.715	0.00142871	0.000590517	0.000947585	0.15	0.6	0.715	0.412956	1.04886	100000	0.0297701	2.08642	1.17699	0.999923	0.861602	0.000947585	0.0011034	0.000950692	00:00:00	697507	00:00:00
2020-12-06	1.3307e+07	0	0	0	0.6	4602.63	12838.4	1.99605e+08	689.16	2.08642		0	2020-12-06	0.587074		0.715	0.00136747	0.000566401	0.000945701	0.15	0.6	0.715	0.412926	1.04886	100000	0.0297106	2.08642	1.17699	0.999926	0.861538	0.000945701	0.00110036	0.000948791	00:00:00	697544	00:00:00
2020-12-07	1.33077e+07	0	0	0	0.6	4414.06	12313.8	1.99615e+08	660.89	2.08642		0	2020-12-07	0.587103		0.715	0.00130882	0.000543255	0.000943823	0.15	0.6	0.715	0.412897	1.04886	100000	0.0296511	2.08642	1.17699	0.999929	0.861477	0.000943823	0.00109733	0.000946896	00:00:00	697578	00:00:00
2020-12-08	1.33083e+07	0	0	0	0.6	4233.13	11810.3	1.99625e+08	633.769	2.08642		0	2020-12-08	0.587131		0.715	0.00125266	0.000521042	0.000941949	0.15	0.6	0.715	0.412869	1.04886	100000	0.0295918	2.08642	1.17699	0.999932	0.861419	0.000941949	0.00109431	0.000945005	00:00:00	697611	00:00:00
2020-12-09	1.33089e+07	0	0	0	0.6	4059.53	11327.1	1.99634e+08	607.749	2.08642		0	2020-12-09	0.587158		0.715	0.00119889	0.000499726	0.000940079	0.15	0.6	0.715	0.412842	1.04886	100000	0.0295326	2.08642	1.17699	0.999935	0.861363	0.000940079	0.00109131	0.000943119	00:00:00	697643	00:00:00
2020-12-10	1.33095e+07	0	0	0	0.6	3892.98	10863.5	1.99643e+08	582.789	2.08642		0	2020-12-10	0.587184		0.715	0.0011474	0.00047927	0.000938215	0.15	0.6	0.715	0.412816	1.04886	100000	0.0294736	2.08642	1.17699	0.999938	0.86131	0.000938215	0.00108831	0.000941237	00:00:00	697674	00:00:00
2020-12-11	1.33101e+07	0	0	0	0.6	3733.2	10418.6	1.99651e+08	558.844	2.08642		0	2020-12-11	0.587208		0.715	0.00109811	0.000459642	0.000936355	0.15	0.6	0.715	0.412792	1.04886	100000	0.0294146	2.08642	1.17699	0.99994	0.861258	0.000936355	0.00108532	0.000939361	00:00:00	697703	00:00:00
2020-12-12	1.33106e+07	0	0	0	0.6	3579.92	9991.67	1.99659e+08	535.875	2.08642		0	2020-12-12	0.587232		0.715	0.00105091	0.000440809	0.0009345	0.15	0.6	0.715	0.412768	1.04886	100000	0.0293558	2.08642	1.17699	0.999943	0.861209	0.0009345	0.00108235	0.000937489	00:00:00	697731	00:00:00
2020-12-13	1.33111e+07	0	0	0	0.6	3432.87	9582.08	1.99667e+08	513.843	2.08642		0	2020-12-13	0.587255		0.715	0.00100573	0.000422739	0.00093265	0.15	0.6	0.715	0.412745	1.04886	100000	0.0292971	2.08642	1.17699	0.999945	0.861162	0.00093265	0.00107938	0.000935622	00:00:00	697758	00:00:00
2020-12-14	1.33116e+07	0	0	0	0.6	3291.81	9189.1	1.99674e+08	492.709	2.08642		0	2020-12-14	0.587277		0.715	0.000962475	0.000405401	0.000930804	0.15	0.6	0.715	0.412723	1.04886	100000	0.0292385	2.08642	1.17699	0.999947	0.861116	0.000930804	0.00107642	0.00093376	00:00:00	697784	00:00:00
2020-12-15	1.33121e+07	0	0	0	0.6	3156.5	8812.07	1.99681e+08	472.438	2.08642		0	2020-12-15	0.587297		0.715	0.000921067	0.000388768	0.000928963	0.15	0.6	0.715	0.412703	1.04886	100000	0.02918	2.08642	1.17699	0.999949	0.861073	0.000928963	0.00107348	0.000931902	00:00:00	697809	00:00:00
2020-12-16	1.33125e+07	0	0	0	0.6	3026.7	8450.37	1.99688e+08	452.996	2.08642		0	2020-12-16	0.587317		0.715	0.000881427	0.00037281	0.000927127	0.15	0.6	0.715	0.412683	1.04886	100000	0.0291217	2.08642	1.17699	0.999952	0.861031	0.000927127	0.00107054	0.00093005	00:00:00	697833	00:00:00
2020-12-17	1.3313e+07	0	0	0	0.6	2902.21	8103.37	1.99694e+08	434.348	2.08642		0	2020-12-17	0.587337		0.715	0.000843481	0.000357502	0.000925295	0.15	0.6	0.715	0.412663	1.04886	100000	0.0290634	2.08642	1.17699	0.999954	0.860991	0.000925295	0.00106761	0.000928201	00:00:00	697856	00:00:00
2020-12-18	1.33134e+07	0	0	0	0.6	2782.8	7770.5	1.99701e+08	416.463	2.08642		0	2020-12-18	0.587355		0.715	0.000807158	0.000342816	0.000923468	0.15	0.6	0.715	0.412645	1.04886	100000	0.0290053	2.08642	1.17699	0.999955	0.860953	0.000923468	0.00106469	0.000926358	00:00:00	697878	00:00:00
2020-12-19	1.33138e+07	0	0	0	0.6	2668.26	7451.18	1.99707e+08	399.309	2.08642		0	2020-12-19	0.587373		0.715	0.00077239	0.000328729	0.000921645	0.15	0.6	0.715	0.412627	1.04886	100000	0.0289473	2.08642	1.17699	0.999957	0.860916	0.000921645	0.00106179	0.000924519	00:00:00	697899	00:00:00
2020-12-20	1.33142e+07	0	0	0	0.6	2558.41	7144.88	1.99712e+08	382.858	2.08642		0	2020-12-20	0.587389		0.715	0.00073911	0.000315215	0.000919827	0.15	0.6	0.715	0.412611	1.04886	100000	0.0288894	2.08642	1.17699	0.999959	0.860881	0.000919827	0.00105889	0.000922685	00:00:00	697919	00:00:00
2020-12-21	1.33145e+07	0	0	0	0.6	2453.06	6851.07	1.99718e+08	367.081	2.08642		0	2020-12-21	0.587406		0.715	0.000707255	0.000302253	0.000918014	0.15	0.6	0.715	0.412594	1.04886	100000	0.0288316	2.08642	1.17699	0.999961	0.860847	0.000918014	0.001056	0.000920856	00:00:00	697938	00:00:00
2020-12-22	1.33149e+07	0	0	0	0.6	2352.01	6569.25	1.99723e+08	351.951	2.08642		0	2020-12-22	0.587421		0.715	0.000676766	0.00028982	0.000916205	0.15	0.6	0.715	0.412579	1.04886	100000	0.0287739	2.08642	1.17699	0.999962	0.860815	0.000916205	0.00105312	0.000919031	00:00:00	697956	00:00:00
2020-12-23	1.33152e+07	0	0	0	0.6	2255.1	6298.94	1.99728e+08	337.441	2.08642		0	2020-12-23	0.587436		0.715	0.000647584	0.000277895	0.000914401	0.15	0.6	0.715	0.412564	1.04886	100000	0.0287164	2.08642	1.17699	0.999964	0.860783	0.000914401	0.00105025	0.000917211	00:00:00	697974	00:00:00
2020-12-24	1.33155e+07	0	0	0	0.6	2162.17	6039.68	1.99733e+08	323.526	2.08642		0	2020-12-24	0.58745		0.715	0.000619654	0.000266457	0.000912601	0.15	0.6	0.715	0.41255	1.04886	100000	0.028659	2.08642	1.17699	0.999965	0.860754	0.000912601	0.00104739	0.000915395	00:00:00	697991	00:00:00
2020-12-25	1.33158e+07	0	0	0	0.6	2073.04	5791.02	1.99738e+08	310.182	2.08642		0	2020-12-25	0.587464		0.715	0.000592923	0.000255486	0.000910806	0.15	0.6	0.715	0.412536	1.04886	100000	0.0286016	2.08642	1.17699	0.999967	0.860725	0.000910806	0.00104454	0.000913584	00:00:00	698007	00:00:00
2020-12-26	1.33161e+07	0	0	0	0.6	1987.57	5552.53	1.99742e+08	297.386	2.08642		0	2020-12-26	0.587477		0.715	0.00056734	0.000244965	0.000909015	0.15	0.6	0.715	0.412523	1.04886	100000	0.0285444	2.08642	1.17699	0.999968	0.860698	0.000909015	0.0010417	0.000911777	00:00:00	698023	00:00:00
2020-12-27	1.33164e+07	0	0	0	0.6	1905.6	5323.8	1.99746e+08	285.116	2.08642		0	2020-12-27	0.58749		0.715	0.000542855	0.000234874	0.000907229	0.15	0.6	0.715	0.41251	1.04886	100000	0.0284874	2.08642	1.17699	0.99997	0.860672	0.000907229	0.00103887	0.000909975	00:00:00	698038	00:00:00
2020-12-28	1.33167e+07	0	0	0	0.6	1827	5104.44	1.99751e+08	273.35	2.08642		0	2020-12-28	0.587502		0.715	0.000519423	0.000225196	0.000905447	0.15	0.6	0.715	0.412498	1.04886	100000	0.0284304	2.08642	1.17699	0.999971	0.860646	0.000905447	0.00103605	0.000908178	00:00:00	698052	00:00:00
2020-12-29	1.3317e+07	0	0	0	0.6	1751.63	4894.07	1.99755e+08	262.067	2.08642		0	2020-12-29	0.587513		0.715	0.000496998	0.000215915	0.000903669	0.15	0.6	0.715	0.412487	1.04886	100000	0.0283735	2.08642	1.17699	0.999972	0.860622	0.000903669	0.00103324	0.000906384	00:00:00	698066	00:00:00
2020-12-30	1.33172e+07	0	0	0	0.6	1679.35	4692.33	1.99758e+08	251.248	2.08642		0	2020-12-30	0.587524		0.715	0.000475537	0.000207014	0.000901896	0.15	0.6	0.715	0.412476	1.04886	100000	0.0283168	2.08642	1.17699	0.999973	0.860599	0.000901896	0.00103043	0.000904596	00:00:00	698079	00:00:00
2020-12-31	1.33175e+07	0	0	0	0.6	1610.04	4498.85	1.99762e+08	240.874	2.08642		0	2020-12-31	0.587535		0.715	0.000455	0.000198479	0.000900128	0.15	0.6	0.715	0.412465	1.04886	100000	0.0282601	2.08642	1.17699	0.999974	0.860577	0.000900128	0.00102764	0.000902812	00:00:00	698092	00:00:00
2021-01-01	1.33177e+07	0	0	0	0.6	1555.03	4324.76	1.99766e+08	242.371	2.18982		0	2021-01-01	0.587546		1	0.000438573	0.000190798	0.000898364	0.15	0.6	1	0.412454	1.04886	100000	0.0282036	2.13812	1.17699	0.999974	0.9032	0.000898364	0.00102485	0.000901032	00:00:00	698105	00:00:00
2021-01-02	1.33179e+07	0	0	0	0.6	1506.76	4162.3	1.99769e+08	236.846	2.21567		0	2021-01-02	0.587556		1	0.00042411	0.000183631	0.000896604	0.15	0.6	1	0.412444	1.04886	100000	0.0281472	2.20274	1.17699	0.999975	0.913838	0.000896604	0.00102208	0.000899257	00:00:00	698117	00:00:00
2021-01-03	1.33182e+07	0	0	0	0.6	1466.24	4012.27	1.99773e+08	232.835	2.24798		0	2021-01-03	0.587566		1	0.000411881	0.000177012	0.000894848	0.15	0.6	1	0.412434	1.04886	100000	0.0280909	2.23182	1.17699	0.999975	0.927141	0.000894848	0.00101931	0.000897486	00:00:00	698129	00:00:00
2021-01-04	1.33184e+07	0	0	0	0.6	1434.81	3875.83	1.99776e+08	230.64	2.28837		0	2021-01-04	0.587577		1	0.000402246	0.000170993	0.000893097	0.15	0.6	1	0.412423	1.04886	100000	0.0280347	2.26817	1.17699	0.999975	0.943776	0.000893097	0.00101655	0.00089572	00:00:00	698141	00:00:00
2021-01-05	1.33186e+07	0	0	0	0.6	1411.69	3752	1.99779e+08	228.12	2.313		0	2021-01-05	0.587587		1	0.000394971	0.000165529	0.00089135	0.15	0.6	1	0.412413	1.04886	100000	0.0279787	2.30068	1.17699	0.999976	0.953913	0.00089135	0.00101381	0.000893958	00:00:00	698153	00:00:00
2021-01-06	1.33189e+07	0	0	0	0.6	1397.61	3641.36	1.99783e+08	226.799	2.33734		0	2021-01-06	0.587597		1	0.000390251	0.000160648	0.000889608	0.15	0.6	1	0.412403	1.04886	100000	0.0279227	2.32517	1.17699	0.999976	0.963925	0.000889608	0.00101107	0.0008922	00:00:00	698165	00:00:00
2021-01-07	1.33191e+07	0	0	0	0.6	1381.92	3544.51	1.99786e+08	226.678	2.35968		0	2021-01-07	0.587607		1	0.000385097	0.000156376	0.00088787	0.15	0.6	1	0.412393	1.04886	100000	0.0278669	2.34851	1.17699	0.999976	0.973115	0.00088787	0.00100834	0.000890447	00:00:00	698177	00:00:00
2021-01-08	1.33193e+07	0	0	0	0.6	1370.89	3460.15	1.9979e+08	225.821	2.3775		0	2021-01-08	0.587617		1	0.000381261	0.000152654	0.000886136	0.15	0.6	1	0.412383	1.04886	100000	0.0278111	2.36859	1.17699	0.999976	0.980443	0.000886136	0.00100561	0.000888698	00:00:00	698189	00:00:00
2021-01-09	1.33195e+07	0	0	0	0.6	1363.59	3388.3	1.99793e+08	225.533	2.39363		0	2021-01-09	0.587627		1	0.000378471	0.000149484	0.000884406	0.15	0.6	1	0.412373	1.04886	100000	0.0277555	2.38557	1.17699	0.999976	0.987069	0.000884406	0.0010029	0.000886954	00:00:00	698201	00:00:00
2021-01-10	1.33198e+07	0	0	0	0.6	1358.6	3328.83	1.99796e+08	225.645	2.4077		0	2021-01-10	0.587637		1	0.000376331	0.00014686	0.000882681	0.15	0.6	1	0.412363	1.04886	100000	0.0277	2.40067	1.17699	0.999976	0.992848	0.000882681	0.0010002	0.000885214	00:00:00	698213	00:00:00
2021-01-11	1.332e+07	0	0	0	0.6	1356.41	3281.41	1.998e+08	225.934	2.41971		0	2021-01-11	0.587646		1	0.000374974	0.000144768	0.00088096	0.15	0.6	1	0.412354	1.04886	100000	0.0276446	2.41371	1.17699	0.999976	0.997775	0.00088096	0.000997503	0.000883478	00:00:00	698225	00:00:00
2021-01-12	1.33202e+07	0	0	0	0.6	1356.16	3245.89	1.99803e+08	226.549	2.43026		0	2021-01-12	0.587656		1	0.000374155	0.000143201	0.000879243	0.15	0.6	1	0.412344	1.04886	100000	0.0275893	2.42498	1.17699	0.999976	1.0021	0.000879243	0.000994817	0.000881746	00:00:00	698236	00:00:00
2021-01-13	1.33204e+07	0	0	0	0.6	1356.84	3222	1.99807e+08	227.355	2.43942		0	2021-01-13	0.587667		1	0.000373594	0.000142147	0.000877531	0.15	0.6	1	0.412333	1.04886	100000	0.0275341	2.43484	1.17699	0.999976	1.00585	0.000877531	0.000992139	0.000880019	00:00:00	698248	00:00:00
2021-01-14	1.33207e+07	0	0	0	0.6	1359.22	3209.33	1.9981e+08	228.203	2.44735		0	2021-01-14	0.587677		1	0.000373501	0.000141588	0.000875822	0.15	0.6	1	0.412323	1.04886	100000	0.0274791	2.44338	1.17699	0.999976	1.0091	0.000875822	0.00098947	0.000878296	00:00:00	698260	00:00:00
2021-01-15	1.33209e+07	0	0	0	0.6	1362.93	3196.2	1.99813e+08	229.243	2.45426		0	2021-01-15	0.587687		1	0.000373771	0.000141009	0.000874118	0.15	0.6	1	0.412313	1.04886	100000	0.0274241	2.4508	1.17699	0.999975	1.01192	0.000874118	0.00098681	0.000876577	00:00:00	698272	00:00:00
2021-01-16	1.33211e+07	0	0	0	0.6	1367.71	3189.78	1.99817e+08	230.425	2.46026		0	2021-01-16	0.587697		1	0.000374332	0.000140726	0.000872418	0.15	0.6	1	0.412303	1.04886	100000	0.0273693	2.45726	1.17699	0.999975	1.01437	0.000872418	0.000984159	0.000874863	00:00:00	698285	00:00:00
2021-01-17	1.33214e+07	0	0	0	0.6	1373.49	3188.66	1.9982e+08	231.717	2.46546		0	2021-01-17	0.587707		1	0.000375163	0.000140676	0.000870722	0.15	0.6	1	0.412293	1.04886	100000	0.0273145	2.46286	1.17699	0.999975	1.01649	0.000870722	0.000981516	0.000873152	00:00:00	698297	00:00:00
2021-01-18	1.33216e+07	0	0	0	0.6	1380.06	3191.14	1.99824e+08	233.119	2.46999		0	2021-01-18	0.587717		1	0.000376203	0.000140786	0.00086903	0.15	0.6	1	0.412283	1.04886	100000	0.0272599	2.46773	1.17699	0.999975	1.01834	0.00086903	0.000978882	0.000871446	00:00:00	698309	00:00:00
2021-01-19	1.33218e+07	0	0	0	0.6	1387.31	3197.62	1.99827e+08	234.601	2.47393		0	2021-01-19	0.587728		1	0.000377422	0.000141072	0.000867343	0.15	0.6	1	0.412272	1.04886	100000	0.0272054	2.47196	1.17699	0.999975	1.01993	0.000867343	0.000976256	0.000869744	00:00:00	698321	00:00:00
2021-01-20	1.33221e+07	0	0	0	0.6	1395.26	3206.98	1.99831e+08	236.152	2.47735		0	2021-01-20	0.587738		1	0.000378826	0.000141484	0.00086566	0.15	0.6	1	0.412262	1.04886	100000	0.027151	2.47564	1.17699	0.999975	1.02132	0.00086566	0.000973639	0.000868047	00:00:00	698334	00:00:00
2021-01-21	1.33223e+07	0	0	0	0.6	1403.8	3218.08	1.99835e+08	237.784	2.48032		0	2021-01-21	0.587749		1	0.000380382	0.000141974	0.00086398	0.15	0.6	1	0.412251	1.04886	100000	0.0270967	2.47883	1.17699	0.999975	1.02251	0.00086398	0.00097103	0.000866353	00:00:00	698346	00:00:00
2021-01-22	1.33225e+07	0	0	0	0.6	1412.86	3231.74	1.99838e+08	239.483	2.4829		0	2021-01-22	0.587759		1	0.000382071	0.000142577	0.000862305	0.15	0.6	1	0.412241	1.04886	100000	0.0270425	2.48161	1.17699	0.999974	1.02355	0.000862305	0.00096843	0.000864664	00:00:00	698359	00:00:00
2021-01-23	1.33228e+07	0	0	0	0.6	1422.38	3247.45	1.99842e+08	241.24	2.48514		0	2021-01-23	0.58777		1	0.000383877	0.00014327	0.000860634	0.15	0.6	1	0.41223	1.04886	100000	0.0269884	2.48402	1.17699	0.999974	1.02445	0.000860634	0.000965838	0.000862978	00:00:00	698371	00:00:00
2021-01-24	1.3323e+07	0	0	0	0.6	1432.31	3264.86	1.99845e+08	243.05	2.48709		0	2021-01-24	0.587781		1	0.000385784	0.000144038	0.000858967	0.15	0.6	1	0.412219	1.04886	100000	0.0269344	2.48611	1.17699	0.999974	1.02523	0.000858967	0.000963254	0.000861297	00:00:00	698384	00:00:00
2021-01-25	1.33233e+07	0	0	0	0.6	1442.62	3283.83	1.99849e+08	244.907	2.48878		0	2021-01-25	0.587791		1	0.000387783	0.000144875	0.000857304	0.15	0.6	1	0.412209	1.04886	100000	0.0268805	2.48794	1.17699	0.999974	1.0259	0.000857304	0.000960679	0.00085962	00:00:00	698397	00:00:00
2021-01-26	1.33235e+07	0	0	0	0.6	1453.27	3304.09	1.99853e+08	246.808	2.49025		0	2021-01-26	0.587802		1	0.000389866	0.000145769	0.000855645	0.15	0.6	1	0.412198	1.04886	100000	0.0268268	2.48952	1.17699	0.999974	1.02648	0.000855645	0.000958112	0.000857947	00:00:00	698410	00:00:00
2021-01-27	1.33238e+07	0	0	0	0.6	1464.24	3325.48	1.99856e+08	248.753	2.49153		0	2021-01-27	0.587813		1	0.000392023	0.000146713	0.00085399	0.15	0.6	1	0.412187	1.04886	100000	0.0267731	2.49089	1.17699	0.999973	1.02698	0.00085399	0.000955553	0.000856279	00:00:00	698423	00:00:00
2021-01-28	1.3324e+07	0	0	0	0.6	1475.49	3348.02	1.9986e+08	250.735	2.49264		0	2021-01-28	0.587824		1	0.000394245	0.000147707	0.000852339	0.15	0.6	1	0.412176	1.04886	100000	0.0267196	2.49209	1.17699	0.999973	1.02741	0.000852339	0.000953002	0.000854614	00:00:00	698436	00:00:00
2021-01-29	1.33243e+07	0	0	0	0.6	1487.01	3371.53	1.99864e+08	252.753	2.49361		0	2021-01-29	0.587835		1	0.000396527	0.000148744	0.000850692	0.15	0.6	1	0.412165	1.04886	100000	0.0266661	2.49312	1.17699	0.999973	1.02778	0.000850692	0.00095046	0.000852953	00:00:00	698449	00:00:00
2021-01-30	1.33245e+07	0	0	0	0.6	1498.76	3395.91	1.99868e+08	254.804	2.49444		0	2021-01-30	0.587847		1	0.000398862	0.000149819	0.000849049	0.15	0.6	1	0.412153	1.04886	100000	0.0266128	2.49403	1.17699	0.999973	1.02809	0.000849049	0.000947925	0.000851296	00:00:00	698463	00:00:00
2021-01-31	1.33248e+07	0	0	0	0.6	1510.74	3421.07	1.99872e+08	256.886	2.49517		0	2021-01-31	0.587858		1	0.000401246	0.00015093	0.00084741	0.15	0.6	1	0.412142	1.04886	100000	0.0265596	2.49481	1.17699	0.999973	1.02837	0.00084741	0.000945399	0.000849644	00:00:00	698476	00:00:00
2021-02-01	1.3325e+07	0	0	0	0.6	1522.93	3446.95	1.99876e+08	258.998	2.49581		0	2021-02-01	0.587869		1	0.000403674	0.000152071	0.000845775	0.15	0.6	1	0.412131	1.04886	100000	0.0265065	2.49549	1.17699	0.999972	1.0286	0.000845775	0.000942881	0.000847995	00:00:00	698490	00:00:00
2021-02-02	1.33253e+07	0	0	0	0.6	1535.31	3473.49	1.9988e+08	261.138	2.49636		0	2021-02-02	0.587881		1	0.000406143	0.000153242	0.000844144	0.15	0.6	1	0.412119	1.04886	100000	0.0264534	2.49608	1.17699	0.999972	1.0288	0.000844144	0.000940371	0.000846351	00:00:00	698504	00:00:00
2021-02-03	1.33256e+07	0	0	0	0.6	1547.88	3500.64	1.99883e+08	263.304	2.49683		0	2021-02-03	0.587893		1	0.000408649	0.00015444	0.000842517	0.15	0.6	1	0.412107	1.04886	100000	0.0264005	2.49659	1.17699	0.999972	1.02896	0.000842517	0.000937869	0.00084471	00:00:00	698517	00:00:00
2021-02-04	1.33258e+07	0	0	0	0.6	1560.63	3528.35	1.99887e+08	265.497	2.49725		0	2021-02-04	0.587904		1	0.000411189	0.000155663	0.000840894	0.15	0.6	1	0.412096	1.04886	100000	0.0263477	2.49704	1.17699	0.999972	1.02911	0.000840894	0.000935375	0.000843073	00:00:00	698531	00:00:00
2021-02-05	1.33261e+07	0	0	0	0.6	1573.54	3556.58	1.99891e+08	267.713	2.49761		0	2021-02-05	0.587916		1	0.000413762	0.000156908	0.000839275	0.15	0.6	1	0.412084	1.04886	100000	0.026295	2.49743	1.17699	0.999971	1.02922	0.000839275	0.000932889	0.000841441	00:00:00	698545	00:00:00
2021-02-06	1.33264e+07	0	0	0	0.6	1586.6	3585.3	1.99896e+08	269.954	2.49792		0	2021-02-06	0.587928		1	0.000416364	0.000158175	0.00083766	0.15	0.6	1	0.412072	1.04886	100000	0.0262424	2.49777	1.17699	0.999971	1.02932	0.00083766	0.00093041	0.000839812	00:00:00	698560	00:00:00
2021-02-07	1.33266e+07	0	0	0	0.6	1599.82	3614.47	1.999e+08	272.218	2.4982		0	2021-02-07	0.58794		1	0.000418993	0.000159462	0.000836048	0.15	0.6	1	0.41206	1.04886	100000	0.02619	2.49806	1.17699	0.999971	1.02941	0.000836048	0.00092794	0.000838187	00:00:00	698574	00:00:00
2021-02-08	1.33269e+07	0	0	0	0.6	1613.19	3644.06	1.99904e+08	274.504	2.49843		0	2021-02-08	0.587952		1	0.000421649	0.000160768	0.000834441	0.15	0.6	1	0.412048	1.04886	100000	0.0261376	2.49831	1.17699	0.999971	1.02947	0.000834441	0.000925477	0.000836566	00:00:00	698588	00:00:00
2021-02-09	1.33272e+07	0	0	0	0.6	1626.7	3674.07	1.99908e+08	276.812	2.49864		0	2021-02-09	0.587964		1	0.000424329	0.000162091	0.000832837	0.15	0.6	1	0.412036	1.04886	100000	0.0260853	2.49853	1.17699	0.99997	1.02953	0.000832837	0.000923023	0.000834949	00:00:00	698603	00:00:00
2021-02-10	1.33275e+07	0	0	0	0.6	1640.34	3704.46	1.99912e+08	279.142	2.49882		0	2021-02-10	0.587977		1	0.000427033	0.000163432	0.000831237	0.15	0.6	1	0.412023	1.04886	100000	0.0260331	2.49873	1.17699	0.99997	1.02957	0.000831237	0.000920576	0.000833336	00:00:00	698617	00:00:00
2021-02-11	1.33278e+07	0	0	0	0.6	1654.12	3735.21	1.99916e+08	281.492	2.49897		0	2021-02-11	0.587989		1	0.000429759	0.000164789	0.000829641	0.15	0.6	1	0.412011	1.04886	100000	0.0259811	2.49889	1.17699	0.99997	1.0296	0.000829641	0.000918137	0.000831727	00:00:00	698632	00:00:00
2021-02-12	1.3328e+07	0	0	0	0.6	1668.03	3766.33	1.99921e+08	283.864	2.49911		0	2021-02-12	0.588002		1	0.000432506	0.000166161	0.000828049	0.15	0.6	1	0.411998	1.04886	100000	0.0259291	2.49904	1.17699	0.99997	1.02963	0.000828049	0.000915705	0.000830122	00:00:00	698647	00:00:00
2021-02-13	1.33283e+07	0	0	0	0.6	1682.07	3797.78	1.99925e+08	286.255	2.49922		0	2021-02-13	0.588014		1	0.000435273	0.000167549	0.000826461	0.15	0.6	1	0.411986	1.04886	100000	0.0258772	2.49916	1.17699	0.999969	1.02964	0.000826461	0.000913281	0.000828521	00:00:00	698662	00:00:00
2021-02-14	1.33286e+07	0	0	0	0.6	1696.23	3829.56	1.99929e+08	288.667	2.49933		0	2021-02-14	0.588027		1	0.000438061	0.000168951	0.000824876	0.15	0.6	1	0.411973	1.04886	100000	0.0258255	2.49927	1.17699	0.999969	1.02965	0.000824876	0.000910865	0.000826923	00:00:00	698677	00:00:00
2021-02-15	1.33289e+07	0	0	0	0.6	1710.52	3861.66	1.99934e+08	291.099	2.49941		0	2021-02-15	0.58804		1	0.000440867	0.000170367	0.000823295	0.15	0.6	1	0.41196	1.04886	100000	0.0257738	2.49937	1.17699	0.999969	1.02966	0.000823295	0.000908457	0.000825329	00:00:00	698693	00:00:00
2021-02-16	1.33292e+07	0	0	0	0.6	1724.93	3894.07	1.99938e+08	293.551	2.49949		0	2021-02-16	0.588053		1	0.000443691	0.000171797	0.000821718	0.15	0.6	1	0.411947	1.04886	100000	0.0257223	2.49945	1.17699	0.999969	1.02966	0.000821718	0.000906056	0.00082374	00:00:00	698708	00:00:00
2021-02-17	1.33295e+07	0	0	0	0.6	1739.46	3926.79	1.99942e+08	296.023	2.49956		0	2021-02-17	0.588066		1	0.000446534	0.000173241	0.000820145	0.15	0.6	1	0.411934	1.04886	100000	0.0256709	2.49952	1.17699	0.999968	1.02965	0.000820145	0.000903663	0.000822154	00:00:00	698724	00:00:00
2021-02-18	1.33298e+07	0	0	0	0.6	1754.11	3959.81	1.99947e+08	298.514	2.49962		0	2021-02-18	0.588079		1	0.000449394	0.000174697	0.000818576	0.15	0.6	1	0.411921	1.04886	100000	0.0256195	2.49959	1.17699	0.999968	1.02964	0.000818576	0.000901277	0.000820571	00:00:00	698739	00:00:00
2021-02-19	1.33301e+07	0	0	0	0.6	1768.88	3993.12	1.99951e+08	301.024	2.49967		0	2021-02-19	0.588092		1	0.000452272	0.000176167	0.00081701	0.15	0.6	1	0.411908	1.04886	100000	0.0255683	2.49964	1.17699	0.999968	1.02963	0.00081701	0.000898898	0.000818993	00:00:00	698755	00:00:00
2021-02-20	1.33304e+07	0	0	0	0.6	1783.76	4026.72	1.99956e+08	303.554	2.49971		0	2021-02-20	0.588106		1	0.000455166	0.000177649	0.000815448	0.15	0.6	1	0.411894	1.04886	100000	0.0255171	2.49969	1.17699	0.999967	1.02962	0.000815448	0.000896528	0.000817418	00:00:00	698771	00:00:00
2021-02-21	1.33307e+07	0	0	0	0.6	1798.77	4060.61	1.99961e+08	306.104	2.49975		0	2021-02-21	0.588119		1	0.000458076	0.000179144	0.00081389	0.15	0.6	1	0.411881	1.04886	100000	0.0254661	2.49973	1.17699	0.999967	1.0296	0.00081389	0.000894164	0.000815847	00:00:00	698787	00:00:00
2021-02-22	1.3331e+07	0	0	0	0.6	1813.89	4094.77	1.99965e+08	308.672	2.49978		0	2021-02-22	0.588133		1	0.000461003	0.000180652	0.000812335	0.15	0.6	1	0.411867	1.04886	100000	0.0254152	2.49976	1.17699	0.999967	1.02958	0.000812335	0.000891808	0.00081428	00:00:00	698803	00:00:00
2021-02-23	1.33313e+07	0	0	0	0.6	1829.13	4129.22	1.9997e+08	311.26	2.49981		0	2021-02-23	0.588147		1	0.000463946	0.000182172	0.000810784	0.15	0.6	1	0.411853	1.04886	100000	0.0253643	2.4998	1.17699	0.999967	1.02956	0.000810784	0.00088946	0.000812717	00:00:00	698820	00:00:00
2021-02-24	1.33316e+07	0	0	0	0.6	1844.48	4163.95	1.99975e+08	313.868	2.49983		0	2021-02-24	0.58816		1	0.000466905	0.000183704	0.000809237	0.15	0.6	1	0.41184	1.04886	100000	0.0253136	2.49982	1.17699	0.999966	1.02953	0.000809237	0.000887118	0.000811157	00:00:00	698836	00:00:00
2021-02-25	1.3332e+07	0	0	0	0.6	1859.95	4198.95	1.99979e+08	316.495	2.49986		0	2021-02-25	0.588174		1	0.00046988	0.000185248	0.000807694	0.15	0.6	1	0.411826	1.04886	100000	0.025263	2.49985	1.17699	0.999966	1.0295	0.000807694	0.000884784	0.000809601	00:00:00	698853	00:00:00
2021-02-26	1.33323e+07	0	0	0	0.6	1875.54	4234.23	1.99984e+08	319.141	2.49988		0	2021-02-26	0.588188		1	0.00047287	0.000186804	0.000806154	0.15	0.6	1	0.411812	1.04886	100000	0.0252125	2.49987	1.17699	0.999966	1.02948	0.000806154	0.000882458	0.000808049	00:00:00	698869	00:00:00
2021-02-27	1.33326e+07	0	0	0	0.6	1891.24	4269.78	1.99989e+08	321.806	2.49989		0	2021-02-27	0.588203		1	0.000475875	0.000188373	0.000804618	0.15	0.6	1	0.411797	1.04886	100000	0.025162	2.49988	1.17699	0.999966	1.02945	0.000804618	0.000880138	0.0008065	00:00:00	698886	00:00:00
2021-02-28	1.33329e+07	0	0	0	0.6	1907.06	4305.6	1.99994e+08	324.491	2.49991		0	2021-02-28	0.588217		1	0.000478896	0.000189953	0.000803085	0.15	0.6	1	0.411783	1.04886	100000	0.0251117	2.4999	1.17699	0.999965	1.02942	0.000803085	0.000877826	0.000804956	00:00:00	698903	00:00:00
2021-03-01	1.33332e+07	0	0	0	0.6	1923	4341.7	1.99999e+08	327.196	2.49992		0	2021-03-01	0.588231		1	0.000481932	0.000191546	0.000801556	0.15	0.6	1	0.411769	1.04886	100000	0.0250615	2.49991	1.17699	0.999965	1.02939	0.000801556	0.000875521	0.000803414	00:00:00	698921	00:00:00
2021-03-02	1.33336e+07	0	0	0	0.6	1939.05	4378.07	2.00004e+08	329.92	2.49993		0	2021-03-02	0.588246		1	0.000484983	0.00019315	0.000800031	0.15	0.6	1	0.411754	1.04886	100000	0.0250114	2.49992	1.17699	0.999965	1.02936	0.000800031	0.000873224	0.000801877	00:00:00	698938	00:00:00
2021-03-03	1.33339e+07	0	0	0	0.6	1955.22	4414.71	2.00009e+08	332.663	2.49994		0	2021-03-03	0.588261		1	0.000488048	0.000194767	0.000798509	0.15	0.6	1	0.411739	1.04886	100000	0.0249613	2.49993	1.17699	0.999964	1.02932	0.000798509	0.000870933	0.000800343	00:00:00	698955	00:00:00
2021-03-04	1.33342e+07	0	0	0	0.6	1971.5	4451.62	2.00014e+08	335.426	2.49995		0	2021-03-04	0.588275		1	0.000491129	0.000196395	0.000796991	0.15	0.6	1	0.411725	1.04886	100000	0.0249114	2.49994	1.17699	0.999964	1.02929	0.000796991	0.00086865	0.000798813	00:00:00	698973	00:00:00
2021-03-05	1.33346e+07	0	0	0	0.6	1987.91	4488.81	2.00019e+08	338.209	2.49995		0	2021-03-05	0.58829		1	0.000494225	0.000198036	0.000795476	0.15	0.6	1	0.41171	1.04886	100000	0.0248616	2.49995	1.17699	0.999964	1.02926	0.000795476	0.000866373	0.000797286	00:00:00	698991	00:00:00
2021-03-06	1.33349e+07	0	0	0	0.6	2004.42	4526.26	2.00024e+08	341.011	2.49996		0	2021-03-06	0.588305		1	0.000497335	0.000199688	0.000793965	0.15	0.6	1	0.411695	1.04886	100000	0.0248119	2.49996	1.17699	0.999963	1.02922	0.000793965	0.000864104	0.000795763	00:00:00	699009	00:00:00
2021-03-07	1.33353e+07	0	0	0	0.6	2021.06	4563.99	2.00029e+08	343.833	2.49996		0	2021-03-07	0.588321		1	0.00050046	0.000201353	0.000792458	0.15	0.6	1	0.411679	1.04886	100000	0.0247622	2.49996	1.17699	0.999963	1.02918	0.000792458	0.000861842	0.000794244	00:00:00	699027	00:00:00
2021-03-08	1.33356e+07	0	0	0	0.6	2037.82	4601.99	2.00034e+08	346.675	2.49997		0	2021-03-08	0.588336		1	0.0005036	0.000203029	0.000790954	0.15	0.6	1	0.411664	1.04886	100000	0.0247127	2.49997	1.17699	0.999963	1.02915	0.000790954	0.000859586	0.000792728	00:00:00	699045	00:00:00
2021-03-09	1.3336e+07	0	0	0	0.6	2054.69	4640.27	2.00039e+08	349.536	2.49997		0	2021-03-09	0.588351		1	0.000506754	0.000204718	0.000789454	0.15	0.6	1	0.411649	1.04886	100000	0.0246633	2.49997	1.17699	0.999963	1.02911	0.000789454	0.000857338	0.000791216	00:00:00	699063	00:00:00
2021-03-10	1.33363e+07	0	0	0	0.6	2071.68	4678.82	2.00045e+08	352.418	2.49998		0	2021-03-10	0.588367		1	0.000509923	0.000206419	0.000787957	0.15	0.6	1	0.411633	1.04886	100000	0.024614	2.49998	1.17699	0.999962	1.02907	0.000787957	0.000855097	0.000789707	00:00:00	699082	00:00:00
2021-03-11	1.33367e+07	0	0	0	0.6	2088.79	4717.65	2.0005e+08	355.319	2.49998		0	2021-03-11	0.588382		1	0.000513106	0.000208131	0.000786464	0.15	0.6	1	0.411618	1.04886	100000	0.0245647	2.49998	1.17699	0.999962	1.02904	0.000786464	0.000852862	0.000788202	00:00:00	699100	00:00:00
2021-03-12	1.3337e+07	0	0	0	0.6	2106.02	4756.74	2.00055e+08	358.241	2.49998		0	2021-03-12	0.588398		1	0.000516304	0.000209856	0.000784974	0.15	0.6	1	0.411602	1.04886	100000	0.0245156	2.49998	1.17699	0.999962	1.029	0.000784974	0.000850635	0.0007867	00:00:00	699119	00:00:00
2021-03-13	1.33374e+07	0	0	0	0.6	2123.37	4796.12	2.00061e+08	361.182	2.49998		0	2021-03-13	0.588414		1	0.000519516	0.000211594	0.000783488	0.15	0.6	1	0.411586	1.04886	100000	0.0244666	2.49998	1.17699	0.999961	1.02896	0.000783488	0.000848414	0.000785202	00:00:00	699138	00:00:00
2021-03-14	1.33378e+07	0	0	0	0.6	2140.84	4835.77	2.00066e+08	364.144	2.49999		0	2021-03-14	0.58843		1	0.000522743	0.000213343	0.000782005	0.15	0.6	1	0.41157	1.04886	100000	0.0244176	2.49999	1.17699	0.999961	1.02892	0.000782005	0.0008462	0.000783708	00:00:00	699157	00:00:00
2021-03-15	1.33381e+07	0	0	0	0.6	2158.43	4875.7	2.00072e+08	367.125	2.49999		0	2021-03-15	0.588446		1	0.000525983	0.000215105	0.000780525	0.15	0.6	1	0.411554	1.04886	100000	0.0243688	2.49999	1.17699	0.999961	1.02888	0.000780525	0.000843993	0.000782217	00:00:00	699177	00:00:00
2021-03-16	1.33385e+07	0	0	0	0.6	2176.14	4915.91	2.00077e+08	370.127	2.49999		0	2021-03-16	0.588463		1	0.000529238	0.000216878	0.00077905	0.15	0.6	1	0.411537	1.04886	100000	0.0243201	2.49999	1.17699	0.99996	1.02884	0.00077905	0.000841793	0.000780729	00:00:00	699196	00:00:00
2021-03-17	1.33389e+07	0	0	0	0.6	2193.97	4956.4	2.00083e+08	373.15	2.49999		0	2021-03-17	0.588479		1	0.000532508	0.000218665	0.000777577	0.15	0.6	1	0.411521	1.04886	100000	0.0242714	2.49999	1.17699	0.99996	1.0288	0.000777577	0.0008396	0.000779245	00:00:00	699216	00:00:00
2021-03-18	1.33392e+07	0	0	0	0.6	2211.92	4997.16	2.00089e+08	376.192	2.49999		0	2021-03-18	0.588496		1	0.000535791	0.000220463	0.000776108	0.15	0.6	1	0.411504	1.04886	100000	0.0242229	2.49999	1.17699	0.99996	1.02876	0.000776108	0.000837413	0.000777765	00:00:00	699235	00:00:00
2021-03-19	1.33396e+07	0	0	0	0.6	2229.99	5038.21	2.00094e+08	379.255	2.49999		0	2021-03-19	0.588513		1	0.000539088	0.000222274	0.000774642	0.15	0.6	1	0.411487	1.04886	100000	0.0241744	2.49999	1.17699	0.999959	1.02872	0.000774642	0.000835233	0.000776288	00:00:00	699255	00:00:00
2021-03-20	1.334e+07	0	0	0	0.6	2248.19	5079.54	2.001e+08	382.338	2.49999		0	2021-03-20	0.588529		1	0.0005424	0.000224097	0.00077318	0.15	0.6	1	0.411471	1.04886	100000	0.0241261	2.49999	1.17699	0.999959	1.02867	0.00077318	0.00083306	0.000774814	00:00:00	699275	00:00:00
2021-03-21	1.33404e+07	0	0	0	0.6	2266.5	5121.14	2.00106e+08	385.442	2.5		0	2021-03-21	0.588546		1	0.000545725	0.000225933	0.000771722	0.15	0.6	1	0.411454	1.04886	100000	0.0240778	2.49999	1.17699	0.999959	1.02863	0.000771722	0.000830893	0.000773344	00:00:00	699296	00:00:00
2021-03-22	1.33408e+07	0	0	0	0.6	2284.94	5163.04	2.00112e+08	388.567	2.5		0	2021-03-22	0.588564		1	0.000549065	0.000227781	0.000770266	0.15	0.6	1	0.411436	1.04886	100000	0.0240297	2.5	1.17699	0.999958	1.02859	0.000770266	0.000828733	0.000771878	00:00:00	699316	00:00:00
2021-03-23	1.33412e+07	0	0	0	0.6	2303.51	5205.21	2.00117e+08	391.711	2.5		0	2021-03-23	0.588581		1	0.000552418	0.000229642	0.000768814	0.15	0.6	1	0.411419	1.04886	100000	0.0239816	2.5	1.17699	0.999958	1.02855	0.000768814	0.00082658	0.000770414	00:00:00	699336	00:00:00
2021-03-24	1.33416e+07	0	0	0	0.6	2322.19	5247.67	2.00123e+08	394.877	2.5		0	2021-03-24	0.588598		1	0.000555785	0.000231515	0.000767366	0.15	0.6	1	0.411402	1.04886	100000	0.0239337	2.5	1.17699	0.999958	1.0285	0.000767366	0.000824433	0.000768955	00:00:00	699357	00:00:00
2021-03-25	1.3342e+07	0	0	0	0.6	2341	5290.41	2.00129e+08	398.063	2.5		0	2021-03-25	0.588616		1	0.000559166	0.000233401	0.00076592	0.15	0.6	1	0.411384	1.04886	100000	0.0238858	2.5	1.17699	0.999957	1.02846	0.00076592	0.000822292	0.000767498	00:00:00	699378	00:00:00
2021-03-26	1.33424e+07	0	0	0	0.6	2359.93	5333.44	2.00135e+08	401.27	2.5		0	2021-03-26	0.588634		1	0.000562561	0.000235299	0.000764478	0.15	0.6	1	0.411366	1.04886	100000	0.023838	2.5	1.17699	0.999957	1.02842	0.000764478	0.000820159	0.000766045	00:00:00	699399	00:00:00
2021-03-27	1.33428e+07	0	0	0	0.6	2378.99	5376.76	2.00141e+08	404.498	2.5		0	2021-03-27	0.588651		1	0.000565969	0.00023721	0.00076304	0.15	0.6	1	0.411349	1.04886	100000	0.0237903	2.5	1.17699	0.999957	1.02837	0.00076304	0.000818031	0.000764595	00:00:00	699420	00:00:00
2021-03-28	1.33432e+07	0	0	0	0.6	2398.17	5420.36	2.00148e+08	407.747	2.5		0	2021-03-28	0.588669		1	0.000569391	0.000239134	0.000761605	0.15	0.6	1	0.411331	1.04886	100000	0.0237428	2.5	1.17699	0.999956	1.02833	0.000761605	0.000815911	0.000763149	00:00:00	699442	00:00:00
2021-03-29	1.33436e+07	0	0	0	0.6	2417.47	5464.25	2.00154e+08	411.016	2.5		0	2021-03-29	0.588688		1	0.000572827	0.00024107	0.000760173	0.15	0.6	1	0.411312	1.04886	100000	0.0236953	2.5	1.17699	0.999956	1.02828	0.000760173	0.000813796	0.000761706	00:00:00	699463	00:00:00
2021-03-30	1.3344e+07	0	0	0	0.6	2436.9	5508.43	2.0016e+08	414.307	2.5		0	2021-03-30	0.588706		1	0.000576276	0.000243019	0.000758744	0.15	0.6	1	0.411294	1.04886	100000	0.0236479	2.5	1.17699	0.999956	1.02823	0.000758744	0.000811689	0.000760267	00:00:00	699485	00:00:00
2021-03-31	1.33444e+07	0	0	0	0.6	2456.46	5552.9	2.00166e+08	417.618	2.5		0	2021-03-31	0.588724		1	0.000579738	0.000244981	0.000757319	0.15	0.6	1	0.411276	1.04886	100000	0.0236006	2.5	1.17699	0.999955	1.02819	0.000757319	0.000809587	0.000758831	00:00:00	699507	00:00:00
2021-04-01	1.33448e+07	0	0	0	0.6	2476.14	5597.66	2.00173e+08	420.95	2.5		0	2021-04-01	0.588743		1	0.000583214	0.000246956	0.000755897	0.15	0.6	1	0.411257	1.04886	100000	0.0235534	2.5	1.17699	0.999955	1.02814	0.000755897	0.000807492	0.000757398	00:00:00	699529	00:00:00
2021-04-02	1.33453e+07	0	0	0	0.6	2495.94	5642.71	2.00179e+08	424.303	2.5		0	2021-04-02	0.588762		1	0.000586703	0.000248943	0.000754478	0.15	0.6	1	0.411238	1.04886	100000	0.0235063	2.5	1.17699	0.999954	1.0281	0.000754478	0.000805403	0.000755968	00:00:00	699551	00:00:00
2021-04-03	1.33457e+07	0	0	0	0.6	2515.87	5688.05	2.00185e+08	427.678	2.5		0	2021-04-03	0.58878		1	0.000590205	0.000250943	0.000753063	0.15	0.6	1	0.41122	1.04886	100000	0.0234593	2.5	1.17699	0.999954	1.02805	0.000753063	0.000803321	0.000754542	00:00:00	699574	00:00:00
2021-04-04	1.33461e+07	0	0	0	0.6	2535.93	5733.68	2.00192e+08	431.073	2.5		0	2021-04-04	0.588799		1	0.000593721	0.000252956	0.000751651	0.15	0.6	1	0.411201	1.04886	100000	0.0234124	2.5	1.17699	0.999954	1.028	0.000751651	0.000801245	0.000753119	00:00:00	699597	00:00:00
2021-04-05	1.33466e+07	0	0	0	0.6	2556.11	5779.6	2.00198e+08	434.49	2.5		0	2021-04-05	0.588819		1	0.000597249	0.000254982	0.000750242	0.15	0.6	1	0.411181	1.04886	100000	0.0233655	2.5	1.17699	0.999953	1.02795	0.000750242	0.000799175	0.000751699	00:00:00	699619	00:00:00
2021-04-06	1.3347e+07	0	0	0	0.6	2576.42	5825.82	2.00205e+08	437.927	2.5		0	2021-04-06	0.588838		1	0.000600791	0.000257021	0.000748836	0.15	0.6	1	0.411162	1.04886	100000	0.0233188	2.5	1.17699	0.999953	1.02791	0.000748836	0.000797112	0.000750283	00:00:00	699642	00:00:00
2021-04-07	1.33474e+07	0	0	0	0.6	2596.86	5872.33	2.00212e+08	441.386	2.5		0	2021-04-07	0.588857		1	0.000604345	0.000259073	0.000747434	0.15	0.6	1	0.411143	1.04886	100000	0.0232722	2.5	1.17699	0.999953	1.02786	0.000747434	0.000795054	0.00074887	00:00:00	699666	00:00:00
2021-04-08	1.33479e+07	0	0	0	0.6	2617.42	5919.13	2.00218e+08	444.866	2.5		0	2021-04-08	0.588877		1	0.000607912	0.000261138	0.000746034	0.15	0.6	1	0.411123	1.04886	100000	0.0232256	2.5	1.17699	0.999952	1.02781	0.000746034	0.000793003	0.00074746	00:00:00	699689	00:00:00
2021-04-09	1.33483e+07	0	0	0	0.6	2638.11	5966.23	2.00225e+08	448.367	2.5		0	2021-04-09	0.588897		1	0.000611492	0.000263216	0.000744638	0.15	0.6	1	0.411103	1.04886	100000	0.0231792	2.5	1.17699	0.999952	1.02776	0.000744638	0.000790958	0.000746054	00:00:00	699712	00:00:00
2021-04-10	1.33488e+07	0	0	0	0.6	2658.93	6013.62	2.00232e+08	451.89	2.5		0	2021-04-10	0.588917		1	0.000615084	0.000265307	0.000743246	0.15	0.6	1	0.411083	1.04886	100000	0.0231328	2.5	1.17699	0.999952	1.02771	0.000743246	0.00078892	0.00074465	00:00:00	699736	00:00:00
2021-04-11	1.33492e+07	0	0	0	0.6	2679.87	6061.31	2.00239e+08	455.433	2.5		0	2021-04-11	0.588937		1	0.000618689	0.000267411	0.000741856	0.15	0.6	1	0.411063	1.04886	100000	0.0230865	2.5	1.17699	0.999951	1.02766	0.000741856	0.000786887	0.00074325	00:00:00	699760	00:00:00
2021-04-12	1.33497e+07	0	0	0	0.6	2700.94	6109.29	2.00245e+08	458.998	2.5		0	2021-04-12	0.588957		1	0.000622307	0.000269527	0.00074047	0.15	0.6	1	0.411043	1.04886	100000	0.0230404	2.5	1.17699	0.999951	1.02761	0.00074047	0.000784861	0.000741853	00:00:00	699784	00:00:00
2021-04-13	1.33502e+07	0	0	0	0.6	2722.14	6157.56	2.00252e+08	462.584	2.5		0	2021-04-13	0.588977		1	0.000625937	0.000271657	0.000739086	0.15	0.6	1	0.411023	1.04886	100000	0.0229943	2.5	1.17699	0.99995	1.02756	0.000739086	0.00078284	0.00074046	00:00:00	699808	00:00:00
2021-04-14	1.33506e+07	0	0	0	0.6	2743.46	6206.14	2.00259e+08	466.192	2.5		0	2021-04-14	0.588998		1	0.000629579	0.0002738	0.000737706	0.15	0.6	1	0.411002	1.04886	100000	0.0229483	2.5	1.17699	0.99995	1.0275	0.000737706	0.000780826	0.000739069	00:00:00	699833	00:00:00
2021-04-15	1.33511e+07	0	0	0	0.6	2764.92	6255.01	2.00266e+08	469.821	2.5		0	2021-04-15	0.589019		1	0.000633233	0.000275956	0.000736329	0.15	0.6	1	0.410981	1.04886	100000	0.0229024	2.5	1.17699	0.99995	1.02745	0.000736329	0.000778818	0.000737682	00:00:00	699858	00:00:00
2021-04-16	1.33516e+07	0	0	0	0.6	2786.5	6304.18	2.00273e+08	473.471	2.5		0	2021-04-16	0.58904		1	0.000636899	0.000278125	0.000734956	0.15	0.6	1	0.41096	1.04886	100000	0.0228566	2.5	1.17699	0.999949	1.0274	0.000734956	0.000776816	0.000736298	00:00:00	699882	00:00:00
2021-04-17	1.3352e+07	0	0	0	0.6	2808.21	6353.64	2.00281e+08	477.142	2.5		0	2021-04-17	0.589061		1	0.000640577	0.000280308	0.000733585	0.15	0.6	1	0.410939	1.04886	100000	0.0228109	2.5	1.17699	0.999949	1.02735	0.000733585	0.000774819	0.000734917	00:00:00	699907	00:00:00
2021-04-18	1.33525e+07	0	0	0	0.6	2830.04	6403.4	2.00288e+08	480.835	2.5		0	2021-04-18	0.589082		1	0.000644267	0.000282503	0.000732217	0.15	0.6	1	0.410918	1.04886	100000	0.0227653	2.5	1.17699	0.999948	1.0273	0.000732217	0.000772829	0.000733539	00:00:00	699933	00:00:00
2021-04-19	1.3353e+07	0	0	0	0.6	2852.01	6453.46	2.00295e+08	484.548	2.5		0	2021-04-19	0.589103		1	0.000647969	0.000284712	0.000730853	0.15	0.6	1	0.410897	1.04886	100000	0.0227197	2.5	1.17699	0.999948	1.02724	0.000730853	0.000770845	0.000732165	00:00:00	699958	00:00:00
2021-04-20	1.33535e+07	0	0	0	0.6	2874.1	6503.82	2.00302e+08	488.284	2.5		0	2021-04-20	0.589125		1	0.000651682	0.000286933	0.000729492	0.15	0.6	1	0.410875	1.04886	100000	0.0226743	2.5	1.17699	0.999948	1.02719	0.000729492	0.000768867	0.000730793	00:00:00	699984	00:00:00
2021-04-21	1.3354e+07	0	0	0	0.6	2896.32	6554.47	2.0031e+08	492.04	2.5		0	2021-04-21	0.589147		1	0.000655407	0.000289168	0.000728134	0.15	0.6	1	0.410853	1.04886	100000	0.0226289	2.5	1.17699	0.999947	1.02713	0.000728134	0.000766894	0.000729425	00:00:00	700010	00:00:00
2021-04-22	1.33545e+07	0	0	0	0.6	2918.67	6605.42	2.00317e+08	495.818	2.5		0	2021-04-22	0.589168		1	0.000659143	0.000291416	0.000726778	0.15	0.6	1	0.410832	1.04886	100000	0.0225837	2.5	1.17699	0.999947	1.02708	0.000726778	0.000764928	0.00072806	00:00:00	700036	00:00:00
2021-04-23	1.3355e+07	0	0	0	0.6	2941.14	6656.67	2.00325e+08	499.617	2.5		0	2021-04-23	0.58919		1	0.00066289	0.000293677	0.000725426	0.15	0.6	1	0.41081	1.04886	100000	0.0225385	2.5	1.17699	0.999946	1.02702	0.000725426	0.000762967	0.000726698	00:00:00	700062	00:00:00
2021-04-24	1.33555e+07	0	0	0	0.6	2963.74	6708.22	2.00332e+08	503.437	2.5		0	2021-04-24	0.589213		1	0.000666648	0.000295951	0.000724077	0.15	0.6	1	0.410787	1.04886	100000	0.0224934	2.5	1.17699	0.999946	1.02697	0.000724077	0.000761012	0.000725339	00:00:00	700088	00:00:00
2021-04-25	1.3356e+07	0	0	0	0.6	2986.47	6760.06	2.0034e+08	507.278	2.5		0	2021-04-25	0.589235		1	0.000670417	0.000298238	0.000722732	0.15	0.6	1	0.410765	1.04886	100000	0.0224485	2.5	1.17699	0.999946	1.02691	0.000722732	0.000759063	0.000723983	00:00:00	700115	00:00:00
2021-04-26	1.33565e+07	0	0	0	0.6	3009.33	6812.21	2.00348e+08	511.141	2.5		0	2021-04-26	0.589258		1	0.000674197	0.000300539	0.000721389	0.15	0.6	1	0.410742	1.04886	100000	0.0224036	2.5	1.17699	0.999945	1.02686	0.000721389	0.00075712	0.00072263	00:00:00	700142	00:00:00
2021-04-27	1.3357e+07	0	0	0	0.6	3032.32	6864.65	2.00355e+08	515.025	2.5		0	2021-04-27	0.58928		1	0.000677988	0.000302852	0.000720049	0.15	0.6	1	0.41072	1.04886	100000	0.0223588	2.5	1.17699	0.999945	1.0268	0.000720049	0.000755183	0.000721281	00:00:00	700169	00:00:00
[truncated: 593 more rows]

## Sheet: World-likely
2020-05-01	2020-05-01	2021-10-01	2020-05-01	2020-08-01	2020-10-01	2021-03-01	scale all unlocks by	0-main region, 1-subregion, 2-without sub	Use Daily Partial Unlock->1	UNLOCK ALL->1	Initial & Unlocked R0	Total / Known case ratio	Mortality as % of vent cases enter at right	FINAL CASES	Econ Cost % 18-month lock down	Total Est. Deaths	Use proportional vent. alloc.	Initial Known Cases on Vent.	Spreading Window (Days)	Case Duration	Vents per capita	Vents avail for current region	Vents main region	Vents subregion (if not auto alloc)	Pre-Peak Vent. Util. Target	MWFSa or late Vent. Util. Target	TTSu Vent. Util. Target	Population	Population main region	Population subregion (e.g. NY St.)	Name of main region	Name of sub-region	Ventil mfg rate/day	Change per day in crit cases on vent (.01%=half in 1 yr.)	region mortality % of vent cases	sub-region mortality % of vent cases	region w/o sub-region mortality % vent cases
[truncated: 998 more rows]

[truncated: 5 more sheets: World-daily, profiles, Analysis, US-exp, US-exp2]
